# Supplementary material for: Combined Transcriptome and Metabolome Analysis of a New Species of Microalgae from the Tibetan Plateau and Its Response to Sewage Treatment
Source: MDPI journal article supplement (doi:10.3390/w14213391), 2022-10-26
Supplement: s1 [file s1]

# Combined Transcriptome and Metabolome Analysis of a New Species of Microalgae from the Tibetan Plateau and Its Response to Sewage Treatment

Jinhu Wang, Qiangying Zhang, Junyu Chen, Jinna Zhou, Jing Li, Yanli Wei, Balmukunda Regmi and Duo Bu

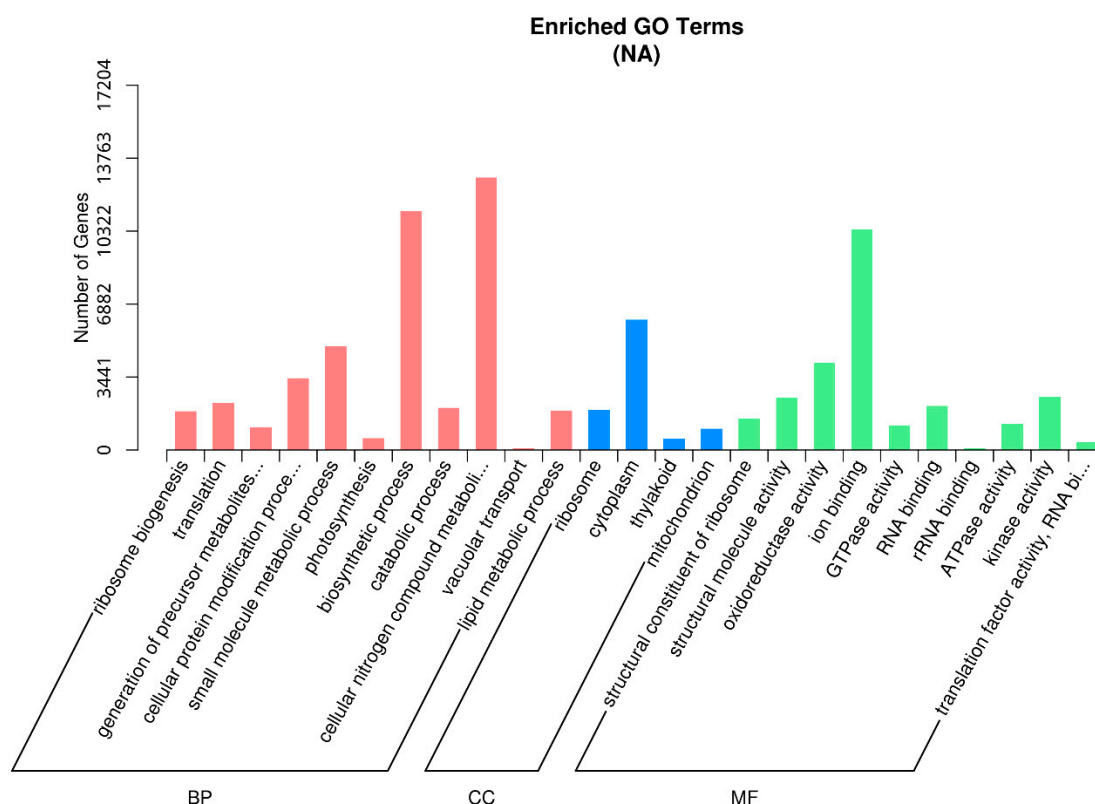

**Figure S1.** GO annotation classification statistics chart.

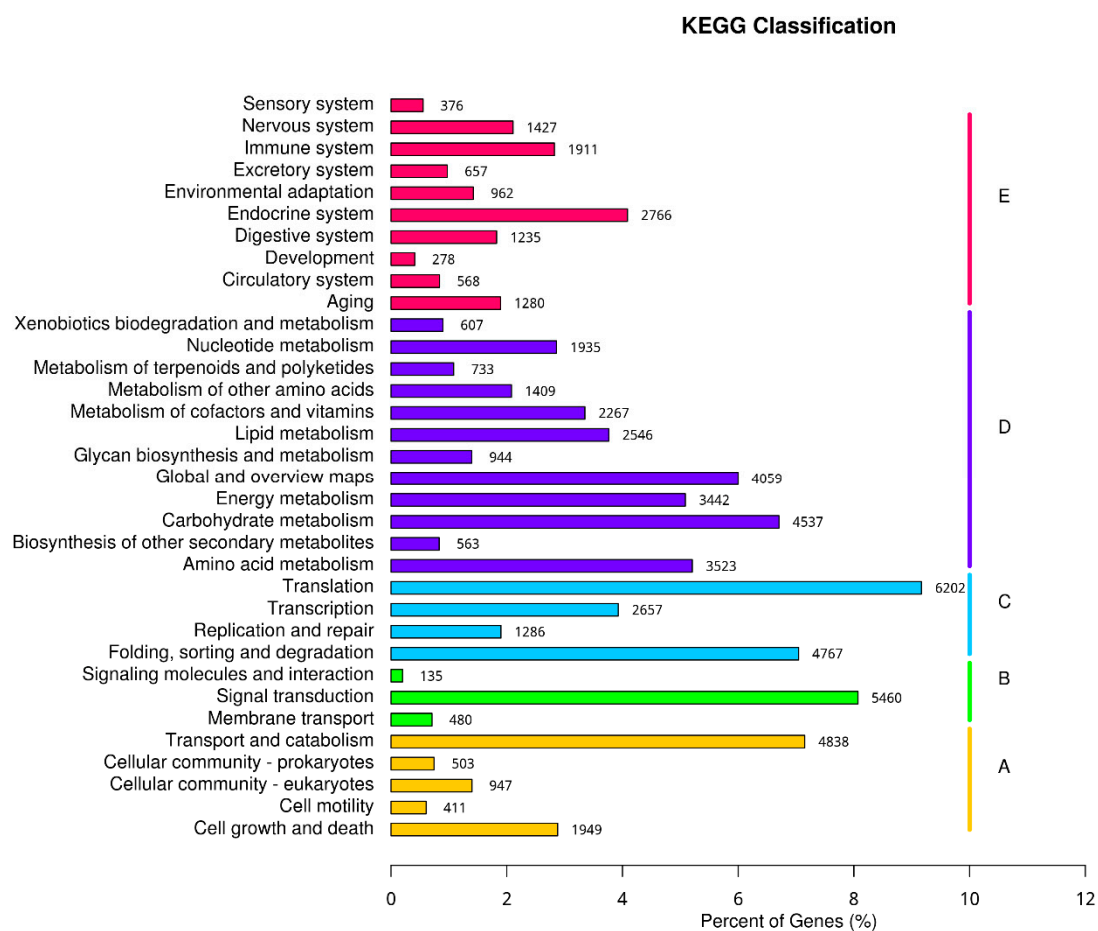

**Figure S2.** Statistical map of KEGG metabolic pathway classification.
