# Supplementary material for: Combined Transcriptome and Metabolome Analysis of a New Species of Microalgae from the Tibetan Plateau and Its Response to Sewage Treatment
Source: MDPI journal article supplement (doi:10.3390/w14213391), 2022-10-26
Supplement: s1 [file s1]

Archive with 6 entries (6 files):
- Table S1.xlt
- Table S2.xlt
- Table S3.xlt
- Table S4.xlt
- Table S5.xlt
- water-1915463-supplementary.pdf
