# Supplementary material for: Combined Transcriptome and Metabolome Analysis of a New Species of Microalgae from the Tibetan Plateau and Its Response to Sewage Treatment
Source: MDPI journal article supplement (doi:10.3390/w14213391), 2022-10-26
Supplement: s1 [file s1 › Table S1.xlt]

## Sheet: YH_3.vs.YH_2_pos_Diff
Compound_ID	Name	Formula	Molecular Weight	RT [min]	m/z	mzCloud_Results	mzVault_Results	MassList_Results	pos_YH_3_1	pos_YH_3_2	pos_YH_3_3	pos_YH_3_4	pos_YH_3_5	pos_YH_3_6	pos_YH_2_1	pos_YH_2_2	pos_YH_2_3	pos_YH_2_4	pos_YH_2_5	pos_YH_2_6	FC	log2FC	Pvalue	ROC	VIP	Up.Down
Com_8207_pos	Glabrene	C20 H18 O4	322.121	1.436	323.128	No results	No results	Full match	1.3125e+07	1.25945e+07	1.30388e+07	1.10407e+07	9.68989e+06	1.12774e+07	750790	654483	760638	653244	804654	852519	15.809	3.98268	1.66493e-12	1	1.69667	up
Com_23277_pos	S-Adenosyl-methionine	C22 H30 N6 O8 S2	570.159	4.897	571.166	No results	No results	Full match	143278	158727	193341	179523	220763	194113	2.25686e+06	2.04637e+06	2.46671e+06	2.34976e+06	3.19696e+06	3.06253e+06	0.0708585	-3.81892	1.20007e-10	1	1.79671	down
Com_4734_pos	Thiamine	C12 H16 N4 O S	264.104	1.465	265.111	Full match	Full match	No results	819069	978838	1.22738e+06	1.07894e+06	1.38186e+06	1.43366e+06	3.28352e+07	3.54987e+07	3.53118e+07	4.13306e+07	3.19924e+07	4.49465e+07	0.0311819	-5.00315	3.12057e-10	1	1.64119	down
Com_1705_pos	LPE 16:4	C21 H36 N O7 P	445.223	7.563	446.23	No results	Full match	No results	1.03906e+08	9.16852e+07	8.95455e+07	1.12444e+08	6.79974e+07	1.00973e+08	4.92191e+06	5.62186e+06	3.23975e+06	5.18576e+06	4.09351e+06	2.92714e+06	21.7989	4.44618	3.30142e-09	1	1.83631	up
Com_757_pos	Propionylcarnitine	C10 H19 N O4	217.131	3.553	218.139	Full match	Full match	No results	3.3146e+06	5.6584e+06	7.96435e+06	6.87929e+06	8.66271e+06	8.06269e+06	2.31611e+08	2.28403e+08	2.5638e+08	2.94042e+08	5.24533e+08	4.22684e+08	0.0207095	-5.59356	3.49472e-09	1	1.83224	down
Com_3326_pos	D-Raffinose	C18 H32 O16	526.151	1.456	527.158	Invalid mass	No results	No results	4.49313e+06	5.54154e+06	6.09875e+06	6.24436e+06	7.08988e+06	5.25773e+06	6.38926e+07	5.71959e+07	6.52087e+07	5.90351e+07	7.02351e+07	6.26293e+07	0.0918183	-3.44507	4.56383e-09	1	1.7356	down
Com_8151_pos	Linalool	C10 H18 O	154.136	7.332	155.143	No results	Full match	Full match	3.62992e+06	3.50468e+06	4.12706e+06	3.32696e+06	3.88188e+06	2.63798e+06	1.56296e+07	1.59303e+07	2.10521e+07	1.94977e+07	1.61108e+07	1.46361e+07	0.205222	-2.28474	5.43757e-09	1	1.79005	down
Com_2257_pos	Ingenol	C20 H28 O5	348.193	5.792	349.2	No results	No results	Full match	8.38484e+06	1.29384e+07	1.38624e+07	9.61744e+06	1.24623e+07	1.12713e+07	9.05476e+07	6.44065e+07	1.14441e+08	1.11758e+08	7.95173e+07	8.63724e+07	0.125286	-2.99671	9.06988e-09	1	1.67779	down
Com_723_pos	N6-Succinyl Adenosine	C14 H17 N5 O8	383.108	5.072	384.115	No results	No results	Full match	1.97063e+08	2.25931e+08	2.48716e+08	2.77148e+08	3.15482e+08	3.38556e+08	2.79941e+07	2.96768e+07	2.90039e+07	3.97356e+07	4.67344e+07	3.70742e+07	7.62489	2.93072	9.77343e-09	1	1.7453	up
Com_9681_pos	Adenylosuccinic acid	C14 H18 N5 O11 P	463.074	4.763	464.082	No results	Full match	Full match	6.1088e+06	5.93415e+06	5.90851e+06	5.83989e+06	6.203e+06	1.09887e+07	697656	585107	477492	580540	804887	756760	10.5019	3.39258	1.1219e-08	1	1.6709	up
Com_2912_pos	Kanosamine	C6 H13 N O5	201.061	1.354	202.069	Invalid mass	No results	No results	1.21787e+06	2.37357e+06	2.62952e+06	1.94679e+06	2.09992e+06	2.67818e+06	3.20664e+07	6.79074e+07	3.97305e+07	3.45844e+07	2.8197e+07	5.02958e+07	0.0512136	-4.28733	1.49204e-08	1	1.3005	down
Com_1683_pos	N'2-(2-furylcarbonyl)-3-chloro-4-methylthiophene-2-carbohydrazide	C11 H9 Cl N2 O3 S	284.006	1.416	285.013	Invalid mass	No results	No results	8.37714e+07	8.68501e+07	8.82745e+07	1.13933e+08	1.14024e+08	1.05269e+08	1.89235e+07	1.26444e+07	2.16538e+07	1.40934e+07	1.73176e+07	1.60776e+07	5.87944	2.55568	1.91157e-08	1	1.75733	up
Com_825_pos	5-(6-hydroxy-6-methyloctyl)-2,5-dihydrofuran-2-one	C13 H22 O3	208.146	6.022	209.153	Invalid mass	No results	No results	2.52395e+07	3.29653e+07	3.68477e+07	3.3297e+07	3.92262e+07	3.28426e+07	1.19836e+08	1.06159e+08	1.57374e+08	1.45136e+08	1.55649e+08	1.57991e+08	0.237985	-2.07105	2.83172e-08	1	1.01761	down
Com_7887_pos	Valepotriate	C22 H30 O8	422.193	5.425	440.229	No results	No results	Full match	2.08147e+06	3.04538e+06	4.00727e+06	3.12046e+06	3.45592e+06	2.9942e+06	2.4511e+07	1.75166e+07	1.30722e+07	2.03486e+07	2.1853e+07	1.9121e+07	0.160662	-2.6379	4.62159e-08	1	1.67103	down
Com_11655_pos	MJN110	C22 H21 Cl2 N3 O4	461.095	4.72	462.102	Invalid mass	No results	No results	483678	259946	492089	374461	604283	289966	6.51183e+06	8.58186e+06	4.81676e+06	5.80707e+06	1.31842e+07	9.26726e+06	0.0519924	-4.26555	4.75272e-08	1	1.66229	down
Com_8548_pos	Pomolic acid beta-D-glucopyranosyl ester	C36 H58 O9	634.407	6.332	635.414	No results	No results	Full match	917775	1.01861e+06	1.33884e+06	1.12954e+06	1.93989e+06	1.8172e+06	1.66804e+07	1.33063e+07	1.73213e+07	1.21427e+07	2.15107e+07	1.60894e+07	0.0840989	-3.57177	7.3162e-08	1	1.75683	down
Com_6978_pos	Cinobufagin	C26 H34 O6	442.234	5.752	443.242	No results	No results	Full match	309969	587129	1.05755e+06	552353	643244	948680	1.46454e+07	1.28497e+07	1.62429e+07	1.6475e+07	2.90265e+07	2.66278e+07	0.035376	-4.82109	7.71723e-08	1	1.87495	down
Com_13024_pos	5-({[5-(trifluoromethyl)pyridin-2-yl]sulfonyl}methyl)-2-furoic acid	C12 H8 F3 N O5 S	372.97	1.372	373.977	Invalid mass	No results	No results	5.34018e+06	5.52076e+06	6.14962e+06	5.03051e+06	4.97661e+06	6.69987e+06	2.0681e+06	1.40928e+06	2.00873e+06	1.54505e+06	1.65906e+06	1.87182e+06	3.19234	1.67461	8.07728e-08	1	1.68113	up
Com_470_pos	D-(+)-Maltose	C12 H22 O11	364.098	1.433	365.105	Invalid mass	No results	No results	4.05441e+07	5.66767e+07	6.88295e+07	5.504e+07	1.0428e+08	5.79679e+07	7.21127e+08	5.03279e+08	7.29223e+08	5.95602e+08	8.88751e+08	8.23745e+08	0.0899491	-3.47475	9.51385e-08	1	1.59852	down
Com_956_pos	QPH	C16 H24 N6 O5	380.181	5.838	381.188	Full match	No results	No results	3.06873e+07	3.40423e+07	2.61455e+07	3.39521e+07	4.56839e+07	3.14375e+07	1.54805e+08	1.27709e+08	1.61828e+08	1.39132e+08	1.53292e+08	1.20302e+08	0.235627	-2.08542	1.02058e-07	1	1.06604	down
Com_8283_pos	Desthiobiotin	C10 H18 N2 O3	214.132	3.789	215.139	Full match	No results	Full match	2.37493e+06	3.06441e+06	4.01304e+06	4.07926e+06	3.27347e+06	3.59324e+06	1.52848e+07	1.30561e+07	1.3052e+07	1.51836e+07	1.91022e+07	1.64032e+07	0.221524	-2.17447	1.06779e-07	1	1.42095	down
Com_713_pos	Cmp_257	C20 H30 O4	351.24	7.506	334.237	Invalid mass	No results	No results	5.82585e+07	6.81043e+07	9.05118e+07	8.05469e+07	8.63246e+07	7.7434e+07	2.72443e+08	2.40292e+08	2.694e+08	2.5768e+08	2.16192e+08	3.49262e+08	0.287291	-1.79941	1.07874e-07	1	1.29485	down
Com_7276_pos	Octanedioic acid	C8 H14 O4	174.089	5.499	175.096	No results	No results	Full match	1.74032e+06	2.53583e+06	2.61932e+06	2.68328e+06	3.68605e+06	2.79417e+06	1.18545e+07	1.27316e+07	1.50055e+07	1.33176e+07	1.75014e+07	1.93681e+07	0.178873	-2.483	1.33323e-07	1	1.4353	down
Com_13446_pos	Sepiapterin	C9 H11 N5 O3	237.086	4.719	238.093	No results	No results	Full match	244359	151361	166972	211209	470669	370368	7.18861e+06	4.95913e+06	4.02871e+06	4.37502e+06	1.02796e+07	9.66152e+06	0.0398823	-4.64811	1.369e-07	1	1.63347	down
Com_1260_pos	15(R)-Prostaglandin D2	C20 H32 O5	369.251	6.737	370.258	Invalid mass	No results	No results	2.02271e+07	2.96455e+07	2.74357e+07	2.29441e+07	2.3468e+07	1.68463e+07	1.18733e+08	1.24034e+08	1.9429e+08	2.36281e+08	1.45308e+08	1.83217e+08	0.140306	-2.83336	1.46185e-07	1	1.41323	down
Com_5725_pos	Dendrobine	C16 H25 N O2	263.188	6.807	264.196	No results	No results	Full match	1.43421e+06	2.11717e+06	3.08257e+06	2.53006e+06	3.26161e+06	2.66877e+06	2.17877e+07	2.06343e+07	2.40092e+07	1.73272e+07	3.51662e+07	4.00058e+07	0.0949748	-3.39631	1.49172e-07	1	1.81476	down
Com_1873_pos	14-Deoxyandrographolide	C20 H30 O4	334.218	5.711	317.215	No results	Invalid mass	No results	9.15246e+06	1.53398e+07	1.63984e+07	1.06578e+07	1.14059e+07	1.01891e+07	1.31493e+08	6.95545e+07	1.39884e+08	1.41678e+08	8.65675e+07	8.29842e+07	0.112155	-3.15643	1.85617e-07	1	1.18516	down
Com_5706_pos	LPE 18:0	C23 H48 N O7 P	481.317	10.373	482.324	No results	Full match	Full match	2.24247e+07	9.85004e+06	7.60727e+06	9.44627e+06	7.88898e+06	1.00945e+07	718843	970498	779160	915397	424645	462739	15.7591	3.97812	1.97961e-07	1	1.48934	up
Com_12608_pos	Helicide	C13 H16 O7	284.09	4.91	285.097	No results	No results	Full match	558754	1.00764e+06	1.27583e+06	797691	1.18342e+06	750251	1.01186e+07	6.59757e+06	8.44802e+06	9.70248e+06	7.4772e+06	4.74545e+06	0.118362	-3.07872	2.17405e-07	1	1.84369	down
Com_896_pos	DL-Carnitine	C7 H15 N O3	161.105	1.446	162.112	Full match	Full match	No results	3.76983e+07	4.96546e+07	5.85153e+07	6.08194e+07	6.40318e+07	6.76002e+07	3.01781e+08	3.04409e+08	3.383e+08	3.17056e+08	3.92521e+08	3.65052e+08	0.167558	-2.57727	2.35342e-07	1	1.80015	down
Com_1324_pos	2-hydroxy-6-[(8Z,11Z)-pentadeca-8,11,14-trien-1-yl]benzoic acid	C22 H30 O3	324.206	9.617	325.213	Invalid mass	No results	No results	2.22999e+07	1.68726e+07	3.71688e+07	2.87194e+07	2.71312e+07	2.59211e+07	1.33358e+08	1.89889e+08	1.26301e+08	2.01119e+08	1.40423e+08	1.43041e+08	0.169262	-2.56267	2.49896e-07	1	1.20076	down
Com_11816_pos	4'-Methoxychalcone	C16 H14 O2	238.099	1.397	239.106	No results	No results	Full match	2.29756e+06	3.13285e+06	2.84047e+06	2.2063e+06	3.34997e+06	3.33177e+06	1.20113e+07	7.94922e+06	9.90091e+06	9.45471e+06	1.28991e+07	1.27424e+07	0.264156	-1.92054	2.65332e-07	1	1.63334	down
Com_5430_pos	Tetrahydrojatrorrhizine	C20 H23 N O4	341.163	5.857	342.169	No results	No results	Full match	3.62477e+06	6.19767e+06	5.54046e+06	4.69833e+06	4.17294e+06	3.92025e+06	3.05308e+07	1.81583e+07	2.95491e+07	3.46164e+07	2.55567e+07	1.92964e+07	0.178523	-2.48582	3.00594e-07	1	1.48828	down
Com_20818_pos	Oryzalexin E	C20 H32 O2	304.24	8.971	305.248	No results	No results	Full match	792552	760509	578928	535966	535998	605759	2.59949e+06	3.08178e+06	2.7066e+06	2.79594e+06	1.86397e+06	1.87941e+06	0.25522	-1.97019	3.99305e-07	1	1.83889	down
Com_49_pos	9-Oxo-10(E),12(E)-octadecadienoic acid	C18 H30 O3	294.219	8.1	317.208	Full match	No results	Full match	6.20761e+08	8.31388e+08	9.11781e+08	8.66401e+08	1.1289e+09	7.84084e+08	2.38531e+09	2.64966e+09	3.89254e+09	2.67024e+09	3.06746e+09	2.9014e+09	0.292789	-1.77207	4.58665e-07	1	1.00811	down
Com_5258_pos	6-(3-hydroxybutan-2-yl)-5-(hydroxymethyl)-4-methoxy-2H-pyran-2-one	C11 H16 O5	250.082	5.682	251.089	Invalid mass	No results	No results	9.79913e+06	1.21697e+07	1.38862e+07	1.3412e+07	1.54903e+07	1.20032e+07	4.65222e+07	2.79688e+07	3.85201e+07	3.61703e+07	4.21219e+07	4.11961e+07	0.330154	-1.59879	4.85459e-07	1	1.39332	down
Com_599_pos	gamma-Glutamylleucine	C11 H20 N2 O5	260.137	5.409	261.145	No results	Full match	Full match	6.6983e+07	8.78762e+07	1.29152e+08	1.01831e+08	1.24035e+08	1.24636e+08	4.50135e+08	4.54549e+08	6.12824e+08	4.34433e+08	6.83831e+08	5.34418e+08	0.20015	-2.32085	4.98293e-07	1	1.74562	down
Com_359_pos	Oxolamine	C14 H19 N3 O	263.16	6.446	264.167	Invalid mass	No results	No results	2.17807e+08	3.26332e+08	3.37359e+08	3.08526e+08	3.45043e+08	3.1197e+08	8.98958e+08	7.4797e+08	1.10604e+09	9.62188e+08	1.26536e+09	1.1788e+09	0.299876	-1.73756	5.60264e-07	1	1.7407	down
Com_3941_pos	Bicyclo Prostaglandin E2	C20 H30 O4	356.196	6.728	357.203	Invalid mass	No results	No results	9.8542e+06	4.32867e+06	4.56329e+06	5.86531e+06	8.40669e+06	5.45924e+06	4.60724e+07	3.98355e+07	6.21206e+07	4.28309e+07	6.21378e+07	6.28344e+07	0.121829	-3.03707	5.61819e-07	1	1.85235	down
Com_5326_pos	7-(2-aminophenyl)heptanoic acid	C13 H19 N O2	221.142	5.431	222.149	Full match	No results	No results	2.04132e+07	2.00285e+07	1.63058e+07	1.89947e+07	2.39646e+07	2.61646e+07	5.27996e+06	8.90348e+06	7.32651e+06	6.60951e+06	7.07831e+06	5.98316e+06	3.05655	1.6119	6.08021e-07	1	1.26458	up
Com_10732_pos	5-Henicosyl-1,3-benzenediol	C27 H48 O2	404.363	11.642	405.37	Invalid mass	No results	No results	8.5353e+06	8.30148e+06	8.56476e+06	7.52628e+06	4.11381e+06	5.4187e+06	392443	254449	466767	332645	349008	117169	22.2017	4.4726	6.56852e-07	1	1.72217	up
Com_3020_pos	3,5-Dimethoxybenzoic acid	C9 H10 O4	160.074	5.5	183.063	Invalid mass	No results	No match	8.9113e+06	8.5869e+06	1.08359e+07	9.6805e+06	1.13702e+07	1.06983e+07	6.51681e+07	4.49892e+07	8.28012e+07	6.28634e+07	7.80951e+07	9.32821e+07	0.140644	-2.82988	7.71545e-07	1	1.7295	down
Com_1392_pos	ACar 5:0	C12 H24 N O4	245.163	5.334	246.17	No results	Invalid mass	No results	2.41452e+07	3.84443e+07	4.50558e+07	3.17183e+07	3.94437e+07	3.76423e+07	1.85806e+08	1.77148e+08	2.07482e+08	1.88538e+08	2.19529e+08	2.14063e+08	0.181499	-2.46197	8.30749e-07	1	1.74273	down
Com_8170_pos	Maltotetraose	C24 H42 O21	688.203	1.527	689.21	Invalid mass	No results	No match	2.15129e+06	3.44709e+06	2.47799e+06	2.29849e+06	4.36804e+06	2.20426e+06	1.61547e+07	1.01986e+07	1.22051e+07	1.94629e+07	1.63401e+07	1.60577e+07	0.187429	-2.41559	8.48086e-07	1	1.67151	down
Com_539_pos	Acetyl-L-carnitine	C9 H17 N O4	203.116	1.936	204.123	Full match	Full match	No results	1.681e+07	2.6872e+07	5.07184e+07	3.83632e+07	4.13844e+07	5.14777e+07	4.68567e+08	4.78312e+08	5.35907e+08	5.68141e+08	7.87569e+08	7.93516e+08	0.0621214	-4.00877	8.57688e-07	1	1.8697	down
Com_404_pos	LPC 16:4	C24 H42 N O7 P	487.27	7.435	488.277	No results	Full match	No results	6.19841e+08	4.42693e+08	2.33345e+08	4.69731e+08	4.23006e+08	5.10673e+08	7.54381e+07	5.30288e+07	5.08718e+07	6.61575e+07	3.6297e+07	2.79976e+07	8.71327	3.12321	9.15081e-07	1	1.45567	up
Com_796_pos	15-Deoxy-Δ12,14-prostaglandin A1	C20 H30 O3	300.209	7.813	301.216	Invalid mass	No match	No match	1.34701e+07	1.60624e+07	2.08839e+07	2.47405e+07	3.08007e+07	2.10937e+07	3.45852e+08	3.53204e+08	3.89814e+08	3.52624e+08	4.08827e+08	3.66641e+08	0.0573088	-4.1251	1.03301e-06	1	1.37413	down
Com_19154_pos	Protostemonine	C25 H31 N O6	441.213	5.438	442.22	No results	No results	Full match	294835	595315	534843	542800	411819	460912	2.8433e+06	2.55412e+06	3.13191e+06	2.51356e+06	3.33789e+06	3.00384e+06	0.163393	-2.61358	1.04683e-06	1	1.41642	down
Com_3415_pos	N,N'-di[4-(2,6-dimethylmorpholino)phenyl]thiourea	C25 H34 N4 O2 S	476.227	5.838	477.234	Invalid mass	No results	No results	8.78886e+06	1.61047e+07	1.05326e+07	1.00267e+07	1.25537e+07	1.20243e+07	5.68529e+07	5.46157e+07	5.74154e+07	6.39784e+07	6.71675e+07	6.08973e+07	0.19403	-2.36565	1.05437e-06	1	1.71747	down
Com_16779_pos	2-Ethyl-3-hydroxy-4H-pyran-4-one	C7 H8 O3	140.047	5.432	141.055	No results	No results	Full match	1.09302e+06	1.40909e+06	1.34268e+06	1.32796e+06	1.85066e+06	1.54849e+06	4.83906e+06	3.70861e+06	6.19749e+06	4.79145e+06	6.25755e+06	7.05292e+06	0.260964	-1.93808	1.20738e-06	1	1.48247	down
Com_439_pos	Tetranor-PGDM	C16 H24 O7	310.141	5.704	311.148	Invalid mass	No results	No results	7.47001e+07	8.63882e+07	1.23329e+08	9.63012e+07	1.22017e+08	1.08235e+08	4.62809e+08	3.18542e+08	4.56335e+08	3.73228e+08	6.9104e+08	5.28591e+08	0.215849	-2.21191	1.24219e-06	1	1.21369	down
Com_333_pos	Ketoisophorone	C9 H12 O2	152.084	6.621	153.091	No results	No results	Full match	1.10579e+08	1.58575e+08	2.60276e+08	1.9775e+08	2.1762e+08	2.04642e+08	6.805e+08	9.7133e+08	9.69895e+08	1.00433e+09	1.36726e+09	1.07374e+09	0.189456	-2.40006	1.24704e-06	1	1.56418	down
Com_1351_pos	Ginkgolic Acid (C13:0)	C20 H32 O3	320.234	8.12	321.241	No results	No results	Full match	3.75416e+07	3.12179e+07	3.49549e+07	2.69739e+07	4.09867e+07	1.94784e+07	2.42691e+08	1.04764e+08	2.63883e+08	2.11776e+08	2.30296e+08	2.39961e+08	0.147795	-2.75833	1.31403e-06	1	1.6917	down
Com_9365_pos	Stachydrine	C7 H13 N O2	143.095	4.144	144.102	No results	No results	Full match	3.74025e+06	5.0029e+06	5.95353e+06	5.11411e+06	5.91966e+06	5.571e+06	1.11088e+07	1.3475e+07	1.48449e+07	1.45619e+07	1.49106e+07	1.26927e+07	0.383625	-1.38223	1.62292e-06	1	1.61644	down
Com_1878_pos	Phosphocholine	C5 H14 N O4 P	183.066	1.445	184.073	No results	Full match	No results	3.3808e+07	3.32523e+07	4.2703e+07	4.37392e+07	4.42507e+07	3.52567e+07	1.15934e+08	9.50398e+07	1.27435e+08	1.06758e+08	1.67966e+08	1.47519e+08	0.306329	-1.70685	1.7153e-06	1	1.64586	down
Com_3492_pos	1-[4-hydroxy-3-(3-methylbut-2-en-1-yl)phenyl]ethan-1-one	C13 H16 O2	204.115	6.125	205.122	Full match	No results	No results	1.07648e+07	1.54059e+07	1.93845e+07	1.46699e+07	1.84466e+07	1.58238e+07	4.12881e+07	4.11278e+07	5.80424e+07	4.58539e+07	6.6769e+07	6.15995e+07	0.30029	-1.73557	1.77934e-06	1	1.28449	down
Com_11767_pos	Lysops 22:5	C28 H46 N O9 P	571.293	5.526	572.3	No results	No results	Full match	1.14973e+06	1.28269e+06	1.23911e+06	1.39842e+06	1.65155e+06	633317	9.12795e+06	8.41035e+06	8.93546e+06	9.61685e+06	1.29893e+07	9.25976e+06	0.126069	-2.98772	1.83389e-06	1	1.80221	down
Com_7308_pos	D-Panthotenate	C9 H17 N O5	219.111	1.509	220.118	No results	No results	Full match	1.00469e+07	9.8486e+06	1.16516e+07	1.18261e+07	1.08887e+07	1.67629e+07	3.67362e+06	2.76607e+06	4.65614e+06	4.27295e+06	3.60183e+06	4.55179e+06	3.01945	1.59429	1.86551e-06	1	1.56581	up
Com_323_pos	HPK	C17 H28 N6 O4	398.228	6.001	399.237	Invalid mass	No results	No results	1.73263e+08	1.99323e+08	1.80516e+08	1.3458e+08	1.37866e+08	1.55276e+08	1.0809e+09	8.67487e+08	1.15772e+09	1.17945e+09	6.31499e+08	6.33627e+08	0.176703	-2.5006	1.97997e-06	1	1.55487	down
Com_23041_pos	Cepharanthine	C37 H38 N2 O6	606.274	8.269	607.281	No results	No results	Full match	1.89717e+06	1.15093e+06	1.48868e+06	1.51987e+06	1.97747e+06	1.91652e+06	179131	375788	148875	162255	131168	149605	8.67671	3.11715	1.98143e-06	1	1.53505	up
Com_152_pos	L-Glutamic acid	C5 H9 N O4	147.053	1.443	148.06	Full match	Full match	Full match	8.06209e+08	9.5631e+08	1.08987e+09	9.14974e+08	1.34773e+09	1.09052e+09	2.94464e+09	2.36763e+09	2.93407e+09	2.09952e+09	2.84646e+09	2.56616e+09	0.393795	-1.34448	2.10931e-06	1	1.14716	down
Com_2048_pos	N6-Me-Adenosine	C11 H15 N5 O4	281.111	1.5	282.118	Invalid mass	No results	No results	2.7616e+07	3.71268e+07	4.02854e+07	3.65489e+07	4.03551e+07	3.28015e+07	8.73403e+07	1.09045e+08	9.85671e+07	8.40547e+07	6.59104e+07	8.58776e+07	0.404551	-1.30561	2.1538e-06	1	1.01133	down
Com_3621_pos	Estriol	C18 H24 O3	288.17	8.004	289.177	Invalid mass	No results	No results	4.29229e+06	5.2122e+06	5.45408e+06	5.60556e+06	9.33644e+06	5.4756e+06	2.02571e+07	1.59036e+07	2.15555e+07	2.07993e+07	2.98445e+07	2.52496e+07	0.264773	-1.91717	2.56086e-06	1	1.04189	down
Com_12297_pos	Retrorsine	C18 H25 N O6	351.169	5.541	352.176	Full match	No results	No results	1.42919e+06	2.53832e+06	2.64295e+06	2.35937e+06	2.66133e+06	2.63891e+06	6.42721e+06	8.45107e+06	9.52835e+06	1.00824e+07	8.67785e+06	7.68845e+06	0.280601	-1.83341	2.56951e-06	1	1.60291	down
Com_8013_pos	WLH	C23 H30 N6 O4	454.233	7.286	455.24	Full match	No results	No results	589241	771123	1.20397e+06	842536	1.10646e+06	816689	7.09672e+06	7.43093e+06	1.12061e+07	9.16861e+06	1.04684e+07	2.46902e+07	0.0760768	-3.7164	2.64408e-06	1	1.55141	down
Com_13113_pos	PC (16:3/16:4)	C40 H66 N O8 P	719.449	11.447	720.456	No results	Full match	No results	3.5031e+06	5.98304e+06	2.29725e+06	5.95904e+06	1.77587e+06	3.34225e+06	169756	380901	278428	486398	183806	151935	13.8446	3.79125	2.78051e-06	1	1.66323	up
Com_9914_pos	VMK	C16 H32 N4 O4 S	376.22	5.5	377.227	Invalid mass	No results	No results	2.21072e+06	2.53281e+06	4.22573e+06	3.30281e+06	4.0539e+06	3.53296e+06	8.87711e+06	1.2336e+07	1.05474e+07	1.25827e+07	1.23951e+07	1.73623e+07	0.268	-1.8997	3.02824e-06	1	1.35868	down
Com_4108_pos	5-Methylcytosine	C5 H7 N3 O	125.059	2.497	126.066	No results	No results	Full match	3.26798e+06	4.8613e+06	5.90662e+06	5.14871e+06	6.05206e+06	6.20103e+06	2.59906e+07	2.34088e+07	2.83377e+07	4.09762e+07	5.89574e+07	4.85683e+07	0.138958	-2.84728	3.1324e-06	1	1.53265	down
Com_3401_pos	6β-Oxycodol N-oxide	C18 H23 N O5	333.161	5.629	334.168	Invalid mass	No results	No results	5.7772e+06	7.411e+06	1.00629e+07	7.0694e+06	8.79005e+06	5.18578e+06	4.18618e+07	3.79919e+07	5.84735e+07	6.43302e+07	2.47055e+07	3.42024e+07	0.169351	-2.56191	3.87877e-06	1	1.21438	down
Com_6165_pos	Panaxydol	C17 H24 O2	260.177	6.594	261.185	No results	No results	Full match	4.8366e+06	7.00997e+06	7.85042e+06	6.57885e+06	1.00607e+07	8.11604e+06	2.34389e+07	1.97244e+07	2.99334e+07	2.50581e+07	2.91755e+07	2.5476e+07	0.290908	-1.78136	3.90873e-06	1	1.48705	down
Com_3368_pos	5-(2,5-dihydroxyhexyl)oxolan-2-one	C10 H18 O4	184.11	6.229	185.117	Invalid mass	No results	No results	4.27706e+06	7.59095e+06	1.04978e+07	1.13091e+07	7.56258e+06	7.55955e+06	5.10309e+07	2.56597e+07	5.2867e+07	6.51987e+07	3.87191e+07	5.976e+07	0.166409	-2.58719	3.93108e-06	1	1.52058	down
Com_16143_pos	FQH	C20 H26 N6 O5	860.402	8.244	861.408	Invalid mass	No results	No results	3.97526e+06	4.08335e+06	3.68994e+06	4.12082e+06	1.80938e+06	2.67632e+06	343406	284978	344020	288613	285314	324707	10.879	3.44348	4.04346e-06	1	1.55563	up
Com_462_pos	Olivetol	C11 H16 O2	180.115	6.205	181.122	No results	No results	Full match	3.35126e+07	3.94303e+07	3.91902e+07	4.22226e+07	5.00282e+07	4.75135e+07	1.96438e+08	1.41276e+08	1.87926e+08	2.15842e+08	2.45784e+08	3.42874e+08	0.189377	-2.40067	4.31858e-06	1	1.10635	down
Com_1169_pos	3-Hydroxy-3-Methylpentane-1,5-Dioic Acid	C6 H10 O5	162.053	1.502	163.06	No results	No results	Full match	4.67661e+07	6.90464e+07	5.34946e+07	7.02168e+07	8.2865e+07	6.02814e+07	2.30806e+08	2.23553e+08	2.4951e+08	1.39266e+08	1.5833e+08	2.18932e+08	0.313562	-1.67318	4.37879e-06	1	1.71222	down
Com_3398_pos	18-Nor-4,15-dihydroxyabieta-8,11,13-trien-7-one	C19 H26 O3	302.187	7.235	303.194	No results	No results	Full match	5.61386e+06	6.52695e+06	9.29781e+06	8.98253e+06	1.22507e+07	9.94244e+06	4.76964e+07	3.34644e+07	4.92152e+07	3.16467e+07	7.66614e+07	6.91004e+07	0.170945	-2.5484	4.63009e-06	1	1.74415	down
Com_1165_pos	Aminopurine	C5 H5 N5	135.054	1.784	136.062	No results	No results	Full match	1.39889e+08	1.12377e+08	1.49739e+08	1.32066e+08	1.21879e+08	1.91699e+08	5.1376e+07	5.88031e+07	4.44685e+07	5.61833e+07	6.65782e+07	6.52882e+07	2.47346	1.30653	4.69021e-06	1	1.17182	up
Com_3232_pos	Akebia saponin D	C47 H76 O18	928.503	11.724	465.259	No results	No results	Full match	3.94299e+07	3.50434e+07	4.37366e+07	4.87929e+07	5.33291e+07	4.85696e+07	5.87536e+06	7.0827e+06	4.74392e+06	8.28308e+06	3.08058e+06	4.0466e+06	8.12091	3.02164	4.69332e-06	1	1.70383	up
Com_870_pos	Prostaglandin H1	C20 H34 O5	336.229	7.502	337.236	Invalid mass	No results	No results	4.85965e+07	7.43703e+07	8.95265e+07	8.0796e+07	9.00199e+07	7.78587e+07	2.03186e+08	2.08506e+08	2.09692e+08	2.22965e+08	3.40932e+08	3.20131e+08	0.30634	-1.70679	4.93609e-06	1	1.18612	down
Com_15604_pos	10-Deacetylasperulosidic acid	C16 H22 O11	390.116	5.126	391.124	No results	No results	Full match	3.80471e+06	2.76095e+06	2.52417e+06	4.63708e+06	3.79552e+06	3.8618e+06	1.00933e+06	879837	1.21926e+06	1.207e+06	1.11747e+06	1.24682e+06	3.20137	1.67869	5.24426e-06	1	1.44858	up
Com_7052_pos	8-Aminooctanoic acid	C8 H17 N O2	159.126	1.771	160.133	No results	No results	Full match	4.23459e+06	5.30429e+06	5.52716e+06	4.22648e+06	6.32883e+06	6.03591e+06	1.53877e+07	1.86947e+07	1.32273e+07	1.24724e+07	2.30035e+07	2.06249e+07	0.306132	-1.70777	5.69542e-06	1	1.23708	down
Com_1587_pos	Trigonelline	C7 H7 N O2	137.048	1.513	138.055	Full match	No results	Full match	9.7997e+06	1.09481e+07	1.45473e+07	1.26103e+07	1.44813e+07	1.24565e+07	6.87924e+07	4.16763e+07	1.01619e+08	5.65895e+07	5.01755e+07	5.82464e+07	0.198471	-2.333	5.86365e-06	1	1.05927	down
Com_10293_pos	Kojic acid	C6 H6 O4	142.024	1.362	143.031	Invalid mass	No results	No results	1.32855e+06	1.00265e+06	1.4756e+06	875275	1.34548e+06	1.49402e+06	1.70791e+07	6.49029e+06	1.27425e+07	7.71025e+06	7.97885e+06	1.67886e+07	0.109342	-3.19308	6.30351e-06	1	1.7849	down
Com_9259_pos	lupinine	C10 H19 N O	169.147	11.479	170.154	No results	No results	Full match	1.0987e+07	8.70035e+06	6.91728e+06	7.14878e+06	3.13904e+06	5.13395e+06	605977	1.56715e+06	456655	906120	485623	531118	9.23122	3.20652	6.79549e-06	1	1.32675	up
Com_3556_pos	2'-Deoxycytidine	C9 H13 N3 O4	227.091	1.947	228.098	No results	Full match	Full match	5.81715e+06	9.35019e+06	1.215e+07	7.35258e+06	1.02841e+07	1.04439e+07	3.27038e+07	3.48914e+07	3.79463e+07	3.85699e+07	6.55097e+07	7.42612e+07	0.195144	-2.35739	6.8566e-06	1	1.76144	down
Com_724_pos	6-Hydroxynicotinic acid	C6 H5 N O3	139.027	3.689	140.034	Full match	No results	Full match	1.15692e+08	1.63961e+08	2.89754e+08	2.03793e+08	3.48791e+08	3.37321e+08	2.40804e+07	2.20855e+07	2.62396e+07	2.60723e+07	5.21767e+07	4.03886e+07	7.63865	2.93332	7.45665e-06	1	1.21431	up
Com_7105_pos	LPE 16:3	C21 H38 N O7 P	447.239	7.851	448.246	No results	Full match	No results	1.63693e+07	1.43347e+07	1.15227e+07	1.32885e+07	1.27151e+07	1.20657e+07	1.15976e+06	2.04287e+06	1.01093e+06	1.58525e+06	925412	660485	10.8733	3.44272	7.54971e-06	1	1.73264	up
Com_2751_pos	XLR11 N-(4-hydroxypentyl) metabolite-d5	C21 H23 [2]H5 F N O2	350.245	11.695	351.252	Invalid mass	No results	No match	5.93435e+07	5.17993e+07	5.0296e+07	5.43564e+07	2.4686e+07	4.16023e+07	5.4803e+06	1.13398e+07	4.85209e+06	8.87723e+06	4.41308e+06	3.41817e+06	7.34963	2.87767	8.07912e-06	1	1.59442	up
Com_6898_pos	4-(4-nitrophenylazo)aniline	C12 H10 N4 O2	242.079	5.173	243.086	Full match	No results	Full match	6.25544e+06	6.39577e+06	9.73692e+06	8.3915e+06	1.11249e+07	8.83774e+06	2.75815e+07	2.12857e+07	3.01792e+07	1.8906e+07	2.42491e+07	1.98611e+07	0.357182	-1.48527	8.26645e-06	1	1.61788	down
Com_4184_pos	N-Sinapoylputrescine	C15 H22 N2 O4	294.157	9.011	295.164	No results	No results	Full match	5.78482e+06	1.06188e+07	1.44958e+07	1.27656e+07	1.31633e+07	1.0365e+07	6.32452e+07	4.03749e+07	5.96857e+07	4.00582e+07	5.30447e+07	4.97141e+07	0.219498	-2.18772	8.97455e-06	1	1.59197	down
Com_3609_pos	2-(2-hydroxy-3-methylbutanamido)-4-methylpentanoic acid	C11 H21 N O4	231.147	5.369	232.155	Full match	No results	No results	9.08535e+06	1.4316e+07	1.75883e+07	1.5144e+07	1.71773e+07	1.51283e+07	5.93587e+07	3.5532e+07	7.03884e+07	5.88742e+07	5.18489e+07	3.66008e+07	0.282912	-1.82157	9.28704e-06	1	1.3363	down
Com_6530_pos	Enrofloxacin	C19 H22 F N3 O3	341.159	4.827	342.166	Invalid mass	No results	No results	6.41249e+06	9.96123e+06	1.12209e+07	8.54687e+06	9.60556e+06	1.16579e+07	1.92162e+07	2.10925e+07	2.76767e+07	2.53046e+07	3.21492e+07	3.03036e+07	0.368589	-1.43992	9.48893e-06	1	1.25061	down
Com_13789_pos	N-glycyl-L-proline	C5 H10 N2 O4	162.064	1.4	163.071	No results	No results	Full match	2.08852e+06	1.97492e+06	2.96302e+06	1.98286e+06	2.63359e+06	2.69803e+06	7.6351e+06	4.6738e+06	6.53665e+06	6.54696e+06	9.82145e+06	6.98053e+06	0.339877	-1.55691	9.67726e-06	1	1.58963	down
Com_545_pos	DGTS (16:4/18:4)	C44 H69 N O7	723.507	11.698	724.514	No results	Full match	No results	4.47883e+08	2.23496e+08	1.25215e+08	1.46629e+08	1.01276e+08	1.85625e+08	1.61376e+07	2.59509e+07	1.2153e+07	1.97039e+07	9.49807e+06	4.9611e+06	13.9147	3.79854	1.0465e-05	1	1.75589	up
Com_4648_pos	2,6-Diethylaniline	C10 H15 N	149.12	6.171	150.128	Full match	No results	No results	1.29804e+07	1.46823e+07	2.25945e+07	2.985e+07	3.3837e+07	2.5225e+07	2.77255e+06	3.69869e+06	2.32005e+06	2.76688e+06	2.95062e+06	3.08497e+06	7.91015	2.9837	1.09349e-05	1	1.17496	up
Com_1428_pos	MAG (18:2)	C21 H38 O4	354.277	9.242	355.284	No results	No results	Full match	1.38523e+08	8.40022e+07	6.74276e+07	9.4741e+07	4.53783e+07	8.62746e+07	8.27857e+06	1.20254e+07	4.46005e+06	8.61659e+06	3.3425e+06	2.61413e+06	13.1261	3.71437	1.21827e-05	1	1.60201	up
Com_20685_pos	RNH	C16 H27 N9 O5	447.201	4.998	448.208	Invalid mass	No results	No results	335105	416378	478748	425854	479230	626389	1.53462e+06	2.50757e+06	2.6183e+06	3.25932e+06	4.3437e+06	1.82798e+06	0.171625	-2.54267	1.24285e-05	1	1.61296	down
Com_8981_pos	LDGTS 14:1	C24 H45 N O6	443.325	8.181	444.332	No results	Full match	No results	1.149e+07	9.87728e+06	1.05259e+07	1.10656e+07	4.52935e+06	7.98611e+06	1.93643e+06	3.14179e+06	1.75475e+06	2.04828e+06	1.96886e+06	1.31821e+06	4.55891	2.18869	1.28573e-05	1	1.27355	up
Com_12589_pos	L-Saccharopine	C11 H20 N2 O6	276.132	1.394	277.139	No results	No results	Full match	1.57927e+06	1.93851e+06	2.33641e+06	1.98984e+06	1.26769e+06	2.44192e+06	8.90885e+06	8.34726e+06	4.2955e+06	5.35145e+06	7.79362e+06	5.83792e+06	0.285031	-1.81081	1.30248e-05	1	1.00081	down
Com_12333_pos	S-Adenosylmethionine	C15 H22 N6 O5 S	398.137	1.408	399.144	Full match	Full match	Full match	6.8563e+06	6.64645e+06	3.44286e+06	2.87715e+06	3.20237e+06	4.86314e+06	1.01184e+06	652116	834403	599180	571193	1.45442e+06	5.44358	2.44456	1.31077e-05	1	1.39473	up
Com_5109_pos	LysoPC 19:0	C27 H56 N O7 P	537.38	10.241	538.387	No results	No results	Full match	2.57974e+07	2.36795e+07	2.16637e+07	2.17379e+07	4.17743e+06	2.2861e+07	645052	2.6479e+06	443595	677114	371335	369024	23.2667	4.54019	1.32362e-05	1	1.74791	up
Com_4743_pos	Triacanthine	C10 H13 N5	203.118	5.795	424.27	No results	No results	Full match	3.78748e+06	4.97718e+06	6.55515e+06	4.82583e+06	5.44025e+06	6.02086e+06	3.03182e+07	1.85094e+07	4.7482e+07	2.78867e+07	4.77843e+07	5.09136e+07	0.141802	-2.81805	1.3245e-05	1	1.65105	down
Com_564_pos	LDGTS 16:3	C26 H45 N O6	467.324	7.75	468.332	No results	Full match	No results	4.32594e+08	3.20522e+08	1.3146e+08	2.96951e+08	2.65307e+08	2.56057e+08	1.21459e+07	2.01061e+07	1.10788e+07	1.84198e+07	5.39907e+06	3.06876e+06	24.2513	4.59999	1.32574e-05	1	1.35138	up
Com_3476_pos	Cafestol	C20 H28 O3	316.204	6.461	317.211	Full match	Full match	Full match	2.79895e+07	2.24075e+07	2.145e+07	2.81783e+07	2.63584e+07	1.9439e+07	5.84161e+07	5.36902e+07	6.04955e+07	5.86782e+07	5.98798e+07	5.94283e+07	0.415937	-1.26556	1.38746e-05	1	1.30898	down
Com_315_pos	3-hydroxy-N-(1-hydroxy-4-methylpentan-2-yl)-5-oxo-6-phenylhexanamide	C18 H27 N O4	321.194	6.622	322.201	Full match	No results	No results	1.35218e+08	1.70872e+08	3.1439e+08	2.54845e+08	2.99061e+08	2.75093e+08	8.2956e+08	1.00028e+09	1.04987e+09	1.03225e+09	1.45375e+09	1.12191e+09	0.223422	-2.16216	1.44273e-05	1	1.06277	down
Com_3729_pos	4-decyl-3-hydroxy-5-oxooxolane-2,3-dicarboxylic acid	C16 H26 O7	352.15	5.504	353.158	Invalid mass	No results	No results	5.38479e+06	6.12996e+06	6.74231e+06	5.83266e+06	3.66597e+06	6.688e+06	3.68223e+07	2.42173e+07	6.96225e+07	2.52544e+07	3.41508e+07	5.61442e+07	0.139895	-2.83759	1.44854e-05	1	1.442	down
Com_1335_pos	Cortisone	C21 H28 O5	378.2	5.222	379.208	Invalid mass	No results	No results	2.49864e+07	3.85766e+07	5.36367e+07	2.36019e+07	4.11747e+07	4.68299e+07	1.54039e+08	1.06979e+08	1.34363e+08	1.5493e+08	2.27233e+08	2.69932e+08	0.218436	-2.19472	1.53319e-05	1	1.20502	down
Com_10846_pos	AMK	C14 H28 N4 O4 S	330.179	5.405	331.187	Invalid mass	No results	No results	1.61518e+06	3.50934e+06	2.94185e+06	2.75959e+06	3.19231e+06	2.4777e+06	1.34205e+07	1.07335e+07	1.22475e+07	1.15758e+07	7.57534e+06	6.1461e+06	0.267364	-1.90313	1.53708e-05	1	1.38784	down
Com_4689_pos	LPE 16:1	C21 H42 N O7 P	451.27	9.22	452.277	No results	Full match	No results	2.24609e+07	2.18303e+07	2.11799e+07	2.94752e+07	1.03663e+07	2.29947e+07	2.14192e+06	3.35267e+06	1.8444e+06	3.04424e+06	926489	870327	10.5342	3.39701	1.70523e-05	1	1.30473	up
Com_5118_pos	Pleuromutilin	C22 H34 O5	395.267	5.626	396.274	Invalid mass	No results	No results	1.82834e+07	1.97574e+07	2.52496e+07	2.54557e+07	2.27393e+07	2.34385e+07	5.18535e+06	5.98946e+06	8.87644e+06	7.49639e+06	5.01119e+06	3.99033e+06	3.69157	1.88424	1.76734e-05	1	1.1018	up
Com_895_pos	Acetylcholine	C7 H15 N O2	145.11	1.511	146.117	Full match	No results	No results	2.21509e+07	4.72806e+07	6.59451e+07	6.21705e+07	6.09707e+07	6.19708e+07	3.15443e+08	2.70975e+08	3.46823e+08	2.89395e+08	4.22615e+08	4.19897e+08	0.155189	-2.6879	2.02237e-05	1	1.48354	down
Com_2551_pos	DGTS (16:4/16:4)	C42 H65 N O7	695.476	11.137	696.484	No results	Full match	No results	6.56894e+07	4.16688e+07	3.40171e+07	3.68421e+07	1.51704e+07	2.95818e+07	2.21787e+06	5.31611e+06	1.46591e+06	3.44739e+06	882639	992797	15.5676	3.96047	2.09085e-05	1	1.76273	up
Com_2844_pos	Fexofenadine	C32 H39 N O4	501.294	5.866	502.301	Invalid mass	No results	No results	1.14504e+07	1.30775e+07	9.17965e+06	1.26234e+07	2.04185e+07	1.48231e+07	3.96089e+07	7.06464e+07	3.55167e+07	4.61115e+07	4.53023e+07	3.13252e+07	0.303796	-1.71883	2.14615e-05	1	1.48223	down
Com_601_pos	Pyroglutamic acid	C5 H7 N O3	129.043	1.439	130.05	No results	Full match	Full match	1.92049e+08	2.09985e+08	2.90882e+08	2.13782e+08	3.11302e+08	2.5654e+08	6.09567e+08	4.92083e+08	6.24848e+08	4.94993e+08	5.63577e+08	4.9947e+08	0.448933	-1.15543	2.23473e-05	1	1.19536	down
Com_4032_pos	LPE 20:1	C25 H50 N O7 P	507.332	10.575	508.34	No results	Full match	No results	3.48291e+07	1.60993e+07	1.14437e+07	1.57683e+07	8.51728e+06	1.31871e+07	1.44979e+06	4.33163e+06	1.32625e+06	2.19979e+06	1.12828e+06	1.00781e+06	8.72498	3.12515	2.29869e-05	1	1.3834	up
Com_23726_pos	(2E)-6-hydroxy-2-methyl-6-(4-methylphenyl)hept-2-enoic acid	C15 H20 O3	230.131	7.812	231.138	Invalid mass	No match	No match	697973	783947	708270	884869	1.2719e+06	642191	1.94121e+06	2.18465e+06	2.25261e+06	2.31537e+06	2.74965e+06	2.61801e+06	0.354809	-1.49489	2.32079e-05	1	1.78191	down
Com_2924_pos	3-(propan-2-yl)-octahydropyrrolo[1,2-a]pyrazine-1,4-dione	C10 H16 N2 O2	196.121	5.094	197.129	Full match	No results	No results	1.89603e+07	2.13967e+07	2.83292e+07	2.60909e+07	2.38264e+07	2.22049e+07	4.19978e+07	6.73749e+07	5.07587e+07	7.86631e+07	5.99573e+07	5.15031e+07	0.402017	-1.31467	2.3702e-05	1	1.59757	down
Com_5534_pos	Carvone	C10 H14 O	150.104	5.732	151.112	Full match	Full match	Full match	9.94657e+06	1.32787e+07	1.43265e+07	1.31161e+07	1.5074e+07	1.43361e+07	2.68343e+07	2.43505e+07	2.93897e+07	2.36652e+07	4.02993e+07	2.79027e+07	0.464378	-1.10663	2.41817e-05	1	1.3593	down
Com_13612_pos	16-Heptadecyne-1,2,4-triol	C17 H32 O3	306.219	11.38	307.226	Invalid mass	No results	No results	5.81692e+06	2.73655e+06	2.49016e+06	2.96649e+06	1.73304e+06	2.64937e+06	672253	623122	979114	587713	450993	430171	4.91337	2.29671	2.48883e-05	1	1.75731	up
Com_3822_pos	(+/-)11(12)-DiHET	C20 H34 O4	360.227	7.492	361.235	Invalid mass	No results	No results	4.39308e+06	4.91324e+06	1.14543e+07	7.93661e+06	1.33284e+07	6.21834e+06	3.51747e+07	3.02435e+07	3.67801e+07	3.66882e+07	6.20522e+07	6.70551e+07	0.180019	-2.47378	2.71931e-05	1	1.68974	down
Com_3505_pos	L-Asparagine	C4 H8 N2 O3	132.053	1.387	133.061	No results	No results	Full match	6.99849e+06	6.6258e+06	1.00386e+07	9.64076e+06	2.11165e+07	8.77433e+06	8.09688e+07	3.17049e+07	6.90696e+07	4.94383e+07	3.60101e+07	5.4373e+07	0.196522	-2.34724	2.745e-05	1	1.64493	down
Com_12587_pos	N,N-Dimethylaniline	C8 H11 N	121.089	5.177	122.096	No results	No results	Full match	3.23067e+06	3.42751e+06	3.21809e+06	3.63878e+06	4.21103e+06	4.03601e+06	6.83965e+06	7.24618e+06	7.98046e+06	8.48786e+06	1.0114e+07	1.20173e+07	0.413057	-1.27559	2.80348e-05	1	1.37017	down
Com_1442_pos	1-(4-benzylpiperazino)-2-(pyridin-2-ylamino)propan-1-one	C19 H24 N4 O	324.192	6.143	325.199	Invalid mass	No results	No results	3.42674e+07	6.22049e+07	5.36019e+07	5.60561e+07	6.49795e+07	4.82215e+07	1.92263e+08	9.83262e+07	2.21561e+08	1.9463e+08	1.40445e+08	1.60228e+08	0.316969	-1.65759	2.94044e-05	1	1.35182	down
Com_1021_pos	Vanillin	C8 H8 O3	152.047	5.587	153.055	Full match	Full match	Full match	2.10942e+08	1.63908e+08	1.88293e+08	1.98421e+08	2.40537e+08	2.09625e+08	1.22825e+08	1.06546e+08	1.08397e+08	1.1496e+08	1.13628e+08	1.18498e+08	1.76933	0.823199	3.00046e-05	1	1.02381	up
Com_326_pos	Valylproline	C10 H18 N2 O3	214.132	4.912	215.139	Full match	No results	Full match	1.47607e+08	2.18766e+08	2.63143e+08	1.85422e+08	2.29437e+08	2.89749e+08	6.80854e+08	6.26184e+08	7.43299e+08	7.09418e+08	1.28395e+09	1.44564e+09	0.243039	-2.04074	3.06194e-05	1	1.65322	down
Com_7386_pos	ACar 8:1	C15 H28 N O4	285.194	5.746	286.201	No results	Invalid mass	No results	3.90081e+06	5.61697e+06	6.36112e+06	4.1781e+06	5.72916e+06	5.56006e+06	1.32654e+07	1.2408e+07	1.4653e+07	1.56277e+07	2.66873e+07	2.22473e+07	0.298852	-1.7425	3.06259e-05	1	1.73878	down
Com_5989_pos	O-7460	C25 H48 F O5 P	495.354	10.21	496.361	Invalid mass	No results	No results	2.10006e+07	1.11017e+07	7.46633e+06	7.74365e+06	5.94551e+06	9.41486e+06	1.14903e+06	1.95617e+06	1.11184e+06	1.53356e+06	552108	422245	9.31942	3.22024	3.07339e-05	1	1.37193	up
Com_4065_pos	Caprolactam	C6 H11 N O	113.084	5.403	114.091	Full match	No results	No results	7.51332e+06	9.38279e+06	1.03653e+07	9.98952e+06	1.09669e+07	1.04245e+07	5.876e+07	2.56738e+07	4.09817e+07	3.57084e+07	2.85093e+07	4.90813e+07	0.245659	-2.02527	3.15244e-05	1	1.35679	down
Com_16723_pos	Adenosine 3'5'-cyclic monophosphate	C10 H12 N5 O6 P	329.052	2.26	330.06	Full match	No results	Full match	484446	1.28411e+06	1.30937e+06	944778	966677	790833	3.86891e+06	2.56945e+06	3.06733e+06	4.18192e+06	6.8467e+06	5.51613e+06	0.221886	-2.17211	3.1765e-05	1	1.6117	down
Com_155_pos	N-[2-chloro-6-(trifluoromethoxy)phenyl]-2,2-dimethylpropanamide	C12 H13 Cl F3 N O2	295.058	1.355	296.066	Full match	No results	No results	9.50003e+08	9.48884e+08	1.18628e+09	1.91829e+09	1.42739e+09	1.58549e+09	2.79139e+08	3.13642e+08	3.31463e+08	3.33982e+08	3.32085e+08	2.94089e+08	4.25405	2.08884	3.27745e-05	1	1.66069	up
Com_8114_pos	L-Alanyl-L-Lysine	C9 H19 N3 O3	217.143	1.385	218.15	No results	No results	Full match	5.2965e+06	4.60196e+06	6.03278e+06	3.47838e+06	5.90965e+06	5.94109e+06	1.34431e+07	1.10892e+07	1.36234e+07	1.42116e+07	2.33985e+07	2.14676e+07	0.321498	-1.63712	3.34059e-05	1	1.1711	down
Com_29258_pos	Chrysophanol 8-O-β-D-glucoside	C21 H20 O9	200.067	1.333	439.098	No results	Invalid mass	No results	119157	105979	136895	144498	165484	144991	826832	953741	822832	1.14782e+06	582733	378118	0.173385	-2.52795	3.85617e-05	1	1.77011	down
Com_4606_pos	L-(+)-Citrulline	C6 H13 N3 O3	197.078	1.4	198.085	Invalid mass	No results	No results	2.63695e+06	4.47894e+06	7.34236e+06	6.17355e+06	7.33892e+06	5.67828e+06	4.12602e+07	3.67802e+07	3.71095e+07	3.98728e+07	4.17749e+07	3.49892e+07	0.145172	-2.78416	4.0821e-05	1	1.70941	down
Com_267_pos	LPE 18:1	C23 H46 N O7 P	441.345	9.726	442.353	No results	Invalid mass	No results	9.90193e+08	6.43889e+08	6.53593e+08	8.06881e+08	4.81542e+08	5.89119e+08	3.8303e+07	9.26373e+07	3.20735e+07	8.1964e+07	2.95914e+07	1.65705e+07	14.3066	3.83861	4.10922e-05	1	1.42526	up
Com_4456_pos	3alpha-Dihydrocadambine	C27 H34 N2 O10	546.223	7.571	547.23	No results	No results	Full match	3.06179e+07	2.34345e+07	1.86821e+07	1.47609e+07	2.17286e+07	1.36445e+07	6.29887e+06	3.30178e+06	1.72847e+06	4.37065e+06	1.9716e+06	2.12917e+06	6.20531	2.6335	4.55569e-05	1	1.37003	up
Com_16013_pos	Lysopc 20:0	C28 H58 N O7 P	551.396	11.41	552.404	No results	No results	Full match	2.19383e+06	3.78582e+06	2.82573e+06	4.41218e+06	2.37148e+06	4.39817e+06	553067	988249	664680	772246	364304	271624	5.53024	2.46734	4.79089e-05	1	1.6704	up
Com_319_pos	L-Alanyl-L-proline	C8 H14 N2 O3	186.1	2.25	187.108	Full match	No results	No results	1.78529e+08	2.80025e+08	3.43819e+08	2.62228e+08	2.87422e+08	3.61859e+08	7.30743e+08	7.00994e+08	8.69503e+08	7.75739e+08	1.41907e+09	1.4832e+09	0.286638	-1.8027	4.80432e-05	1	1.58038	down
Com_5509_pos	Erianin	C18 H22 O5	318.146	6.071	336.18	No results	No results	Full match	5.46389e+06	7.35006e+06	8.31542e+06	8.44283e+06	9.23732e+06	1.54438e+07	3.23961e+07	1.84948e+07	3.77731e+07	3.40755e+07	2.81551e+07	2.97844e+07	0.300274	-1.73565	4.93646e-05	1	1.27236	down
Com_11783_pos	RMK	C17 H35 N7 O4 S	415.233	7.81	416.241	Invalid mass	No results	No results	5.07015e+06	5.44304e+06	7.35167e+06	6.21128e+06	8.30506e+06	7.11752e+06	1.91782e+06	1.9065e+06	2.69268e+06	2.18458e+06	2.77728e+06	1.16419e+06	3.12415	1.64346	4.97095e-05	1	1.36439	up
Com_11095_pos	7-(1-pyrrolidinyl)pyrimido[4,5-d]pyrimidin-4-amine	C10 H12 N6	216.111	4.84	217.118	Invalid mass	No results	No results	2.24907e+06	1.44784e+06	1.59957e+06	1.06634e+06	1.61304e+06	770739	1.07559e+07	3.83535e+06	9.06429e+06	7.20952e+06	5.82243e+06	4.30463e+06	0.213373	-2.22855	5.00088e-05	1	1.14959	down
Com_116_pos	9,17-Octadecadiene-12,14-diyne-1,11,16-triol	C18 H26 O3	290.188	6.492	291.195	No results	No results	Full match	3.88679e+08	4.27591e+08	3.20678e+08	4.23843e+08	4.99485e+08	4.30682e+08	1.90835e+09	1.56636e+09	2.0342e+09	1.76133e+09	3.99768e+09	3.87749e+09	0.16447	-2.60411	5.15341e-05	1	1.77456	down
Com_2709_pos	LDGTS 22:5	C32 H53 N O6	547.387	9.42	548.394	No results	Full match	No results	3.64756e+07	5.82552e+07	4.10997e+07	4.31492e+07	2.47885e+07	3.99433e+07	4.83572e+06	7.97632e+06	3.29398e+06	5.76723e+06	3.04101e+06	1.44244e+06	9.24666	3.20893	5.30218e-05	1	1.10267	up
Com_1813_pos	6-Shogaol	C17 H24 O3	276.172	6.418	277.179	No results	No results	Full match	4.14731e+07	4.99591e+07	5.40498e+07	5.70838e+07	8.08302e+07	6.53453e+07	1.20985e+08	1.18549e+08	1.41747e+08	1.33564e+08	1.74746e+08	1.01517e+08	0.440827	-1.18172	5.30684e-05	1	1.33293	down
Com_1581_pos	5α-Dihydrotestosterone glucuronide	C25 H38 O8	466.256	7.239	467.264	Full match	No results	No results	1.21848e+08	9.01226e+07	5.22689e+07	7.37484e+07	7.1589e+07	7.79399e+07	2.93636e+07	1.60246e+07	1.89024e+07	3.0311e+07	1.59892e+07	1.06747e+07	4.02024	2.00728	5.5268e-05	1	1.35716	up
Com_6220_pos	PLH	C17 H27 N5 O4	347.195	5.409	348.202	Invalid mass	No results	No results	1.12553e+07	1.91291e+07	1.90806e+07	1.56618e+07	1.15122e+07	1.65495e+07	5.53958e+06	6.30004e+06	7.60937e+06	5.67146e+06	5.96077e+06	6.3423e+06	2.4901	1.31621	5.9247e-05	1	1.54997	up
Com_3635_pos	Cyclopropyl fentanyl-d5	C23 H23 [2]H5 N2 O	353.256	5.638	354.264	Invalid mass	No results	No results	8.65672e+06	1.1256e+07	1.61638e+07	1.38218e+07	1.6267e+07	1.4624e+07	6.7549e+07	3.25671e+07	7.22823e+07	3.90768e+07	3.766e+07	3.52179e+07	0.284116	-1.81545	5.92501e-05	1	1.04247	down
Com_7605_pos	Phytocassane E	C20 H28 O3	316.204	7.292	317.211	No results	No results	Full match	1.79468e+06	2.00618e+06	2.35466e+06	1.90733e+06	2.82046e+06	6.79848e+06	1.27447e+07	1.84279e+07	2.31505e+07	2.13e+07	1.82292e+07	1.62633e+07	0.160575	-2.63868	6.35675e-05	1	1.80325	down
Com_22045_pos	Brassinolide	C28 H48 O6	480.347	6.022	481.354	No results	No results	Full match	724803	1.74114e+06	2.09385e+06	1.74465e+06	2.14166e+06	1.30033e+06	200762	662608	212071	358787	246009	313763	4.88788	2.28921	6.42192e-05	1	1.65609	up
Com_22022_pos	vasicine	C11 H12 N2 O	188.094	5.271	399.177	No results	No results	Full match	781203	1.20335e+06	1.24405e+06	1.19273e+06	1.20684e+06	1.54317e+06	1.86998e+06	2.67092e+06	3.3065e+06	2.39032e+06	3.21374e+06	3.18669e+06	0.431019	-1.21418	6.43368e-05	1	1.60055	down
Com_8112_pos	(2S)-2-(2-hydroxypropan-2-yl)-2H,3H,7H-furo[3,2-g]chromen-7-one	C14 H14 O4	246.087	5.746	247.094	Invalid mass	No results	No results	3.32891e+06	3.67115e+06	3.50565e+06	3.33361e+06	4.14756e+06	4.46419e+06	1.66445e+07	7.02396e+06	1.2077e+07	1.02843e+07	1.10666e+07	1.02673e+07	0.333282	-1.58519	6.53719e-05	1	1.10127	down
Com_19618_pos	Adenosine 5'-Diphosphate	C10 H15 N5 O10 P2	427.03	2.336	428.037	No results	No results	Full match	1.92606e+06	2.73508e+06	1.94639e+06	2.32959e+06	2.81812e+06	2.85043e+06	1.23295e+06	1.12406e+06	1.50583e+06	911946	1.29405e+06	1.39497e+06	1.95686	0.968543	7.22973e-05	1	1.05719	up
Com_17516_pos	Narasin	C43 H72 O11	781.53	11.601	782.537	Invalid mass	No results	No results	180374	184921	133010	141147	138463	133864	989884	1.78715e+06	2.42942e+06	2.91819e+06	753330	1.09198e+06	0.0914526	-3.45083	7.27515e-05	1	1.21658	down
Com_7464_pos	5,8-dihydroxy-10-methyl-5,8,9,10-tetrahydro-2H-oxecin-2-one	C10 H14 O4	180.079	5.927	181.086	Invalid mass	No match	No match	3.40294e+06	2.914e+06	4.07723e+06	3.34518e+06	4.63946e+06	4.55884e+06	1.24328e+07	1.01816e+07	1.52844e+07	1.10912e+07	2.6296e+07	2.20842e+07	0.235572	-2.08576	7.57702e-05	1	1.39422	down
Com_309_pos	Tetranor-12(S)-HETE	C16 H26 O3	288.17	7.127	289.177	Invalid mass	No results	No results	3.84782e+08	4.45491e+08	5.73158e+08	5.69018e+08	8.01783e+08	5.31009e+08	1.31705e+09	1.05175e+09	1.42381e+09	1.07344e+09	1.48247e+09	1.38575e+09	0.42735	-1.22651	7.82699e-05	1	1.64029	down
Com_25287_pos	Bilobalide	C15 H18 O8	326.101	5.553	327.108	No results	No results	Full match	255518	395387	503189	359831	727359	590868	2.28572e+06	1.80092e+06	2.17767e+06	1.9609e+06	2.18691e+06	1.65688e+06	0.234663	-2.09134	7.87996e-05	1	1.70256	down
Com_1498_pos	4-Phenyl-3-buten-2-one	C10 H10 O	146.073	6.821	147.08	Full match	No results	No results	2.38429e+07	2.84506e+07	4.5871e+07	2.93242e+07	3.40953e+07	3.936e+07	8.46535e+07	8.71932e+07	1.19291e+08	9.06683e+07	2.24386e+08	1.27793e+08	0.273771	-1.86896	8.41503e-05	1	1.35446	down
Com_15931_pos	Icariin	C33 H40 O15	676.224	8.044	677.231	Invalid mass	No results	No results	1.4327e+06	1.20308e+06	1.19822e+06	1.30992e+06	953194	1.23904e+06	7.92395e+06	3.66828e+06	7.81791e+06	3.21538e+06	5.3104e+06	4.55798e+06	0.22577	-2.14707	9.47387e-05	1	1.21541	down
Com_3896_pos	PC (18:0e/2:0)	C28 H58 N O7 P	551.395	10.47	552.402	No results	Full match	Full match	2.24405e+07	3.51689e+07	3.21543e+07	2.84523e+07	1.16216e+07	2.01081e+07	4.29974e+06	1.01546e+07	4.56693e+06	6.92701e+06	3.35053e+06	3.07043e+06	4.63236	2.21175	9.6013e-05	1	1.12434	up
Com_785_pos	Cytosine	C4 H5 N3 O	111.043	1.736	112.05	Full match	Full match	Full match	1.08659e+08	1.53853e+08	1.38031e+08	1.72479e+08	2.08721e+08	1.19543e+08	3.18006e+08	2.79388e+08	2.7537e+08	3.38888e+08	5.04268e+08	4.21137e+08	0.421742	-1.24557	9.66686e-05	1	1.5293	down
Com_1544_pos	L-Leucyl-L-alanine Hydrate	C9 H18 N2 O3	202.132	4.14	203.139	No results	No results	Full match	1.22972e+07	1.99885e+07	2.58887e+07	2.27182e+07	2.48017e+07	2.32104e+07	6.98707e+07	7.49933e+07	9.7382e+07	8.4898e+07	2.16756e+08	1.92875e+08	0.174958	-2.51492	9.87159e-05	1	1.37304	down
Com_2700_pos	2-Aminoadipic acid	C6 H11 N O4	161.069	1.527	162.076	Full match	Full match	Full match	1.64104e+07	2.29929e+07	3.50937e+07	2.49739e+07	4.06817e+07	3.13327e+07	6.22403e+07	7.57587e+07	9.08752e+07	8.22008e+07	9.81148e+07	9.77777e+07	0.338257	-1.56381	0.000101356	1	1.08052	down
Com_130_pos	Leucylproline	C11 H20 N2 O3	228.147	5.23	229.155	Full match	No results	Full match	4.52969e+08	6.58812e+08	8.6732e+08	6.48806e+08	8.01971e+08	9.11148e+08	1.81675e+09	1.73739e+09	1.87185e+09	1.71967e+09	3.25662e+09	3.73701e+09	0.307019	-1.7036	0.000101963	1	1.5016	down
Com_13753_pos	3-Acetyl-11-keto-β-boswellic acid	C32 H48 O5	512.36	11.04	513.367	Invalid mass	No results	No results	755500	286540	865982	943193	306749	1.07575e+06	2.4662e+06	7.1121e+06	2.65955e+06	4.96716e+06	4.55228e+06	5.22266e+06	0.156921	-2.67189	0.000110345	1	1.12568	down
Com_7848_pos	TMK	C15 H30 N4 O5 S	189.1	1.581	190.107	Invalid mass	No results	No results	5.41128e+06	5.17176e+06	9.22303e+06	4.7391e+06	7.0555e+06	8.36653e+06	2.09486e+07	1.32446e+07	2.06872e+07	1.14955e+07	1.68318e+07	1.61503e+07	0.402254	-1.31382	0.00011321	1	1.09508	down
Com_24856_pos	L-Cystathionine	C7 H14 N2 O4 S	222.067	1.474	223.074	No results	No results	Full match	526280	830608	901852	1.1171e+06	921664	1.14226e+06	2.6054e+06	1.87623e+06	2.41188e+06	1.86296e+06	2.63845e+06	2.16262e+06	0.401235	-1.31748	0.000113555	1	1.71158	down
Com_6533_pos	Polygalic acid	C29 H44 O6	488.313	10.169	489.32	No results	No results	Full match	7.63116e+06	1.52811e+07	1.82203e+07	1.46413e+07	6.62742e+06	8.03338e+06	2.23737e+06	3.7381e+06	1.75484e+06	3.00555e+06	1.06657e+06	1.03371e+06	5.48722	2.45608	0.000115856	1	1.44961	up
Com_26563_pos	Celastrol	C29 H38 O4	450.275	8.802	451.283	No results	No results	Full match	862982	756321	628910	757684	584020	692269	355474	285367	270140	257700	156736	174100	2.85571	1.51385	0.000117824	1	1.0339	up
Com_7655_pos	Nicotianamine	C12 H21 N3 O6	303.143	5.208	304.15	No results	No results	Full match	3.09613e+06	4.19691e+06	4.90494e+06	3.95535e+06	4.45206e+06	5.7813e+06	1.23888e+07	9.49552e+06	1.74597e+07	1.34024e+07	2.43355e+07	2.63136e+07	0.255201	-1.97029	0.000127909	1	1.34144	down
Com_5315_pos	N1-(1H-indol-4-yl)cyclohexane-1-carboxamide	C15 H18 N2 O	280.099	4.968	281.106	Invalid mass	No results	No results	1.91827e+07	2.137e+07	2.40942e+07	1.94243e+07	2.1082e+07	2.01409e+07	1.36147e+07	8.48875e+06	1.04535e+07	1.15853e+07	8.04455e+06	8.43157e+06	2.06693	1.04749	0.000129084	1	1.62213	up
Com_4224_pos	LysoPC 20:2	C28 H54 N O7 P	547.365	9.682	570.354	No results	No results	Full match	1.84791e+07	2.41647e+07	3.21753e+07	3.03244e+07	7.38766e+06	6.96934e+06	1.7758e+06	3.42061e+06	976488	3.74853e+06	1.52914e+06	1.17894e+06	9.462	3.24215	0.000134827	1	1.37305	up
Com_3238_pos	Gly-Tyr	C11 H14 N2 O4	238.095	4.734	239.103	No results	Full match	Full match	1.51317e+07	1.90747e+07	2.48582e+07	1.91803e+07	2.21406e+07	2.62399e+07	5.40293e+07	3.73741e+07	5.10983e+07	4.21825e+07	8.21325e+07	7.38121e+07	0.37174	-1.42763	0.000143598	1	1.56513	down
Com_1820_pos	LDGTS 18:0	C28 H55 N O6	501.403	10.243	502.41	No results	Full match	No results	1.00504e+08	8.79188e+07	8.1727e+07	7.53683e+07	3.84057e+07	5.38046e+07	7.69627e+06	1.84154e+07	9.18087e+06	1.59481e+07	6.13436e+06	3.05774e+06	7.24323	2.85663	0.00015292	1	1.14965	up
Com_13490_pos	5,6-dimethyl-4-oxo-4H-pyran-2-carboxylic acid	C8 H8 O4	185.066	1.34	186.074	Invalid mass	Invalid mass	No results	1.33447e+06	1.32275e+06	1.39281e+06	1.38385e+06	1.61485e+06	1.36887e+06	5.86091e+06	3.2273e+06	5.48561e+06	4.07123e+06	7.45938e+06	7.9905e+06	0.246887	-2.01808	0.000154521	1	1.29807	down
Com_2728_pos	D-(-)-Aspartic acid	C4 H7 N O4	133.037	1.42	134.045	Full match	No results	Full match	1.23072e+07	1.18799e+07	1.26909e+07	1.28858e+07	1.38204e+07	1.3454e+07	9.67216e+07	3.95054e+07	6.52478e+07	4.68493e+07	9.78608e+07	1.07454e+08	0.169823	-2.55789	0.000156102	1	1.74055	down
Com_4114_pos	(S)-AL 8810	C24 H31 F O4	424.208	5.628	425.215	Invalid mass	No results	No results	8.26188e+06	8.09635e+06	6.88934e+06	5.84613e+06	5.75262e+06	6.01919e+06	2.56302e+07	2.16257e+07	3.25493e+07	4.94541e+07	1.66578e+07	1.91929e+07	0.247505	-2.01447	0.000159064	1	1.32974	down
Com_3979_pos	ethyl 4-({[(3-morpholinopropyl)amino]carbothioyl}amino)benzoate	C17 H25 N3 O3 S	373.149	9.72	374.154	Invalid mass	No results	No results	4.82754e+06	4.31285e+06	7.7045e+06	7.75756e+06	1.38933e+07	2.09423e+06	5.55785e+07	1.73971e+07	5.09741e+07	3.52393e+07	5.19957e+07	6.34859e+07	0.147777	-2.75851	0.000166406	1	1.36949	down
Com_27702_pos	Cimifugin	C16 H18 O6	306.11	8.844	613.228	No results	No results	Full match	673720	661475	499039	1.05457e+06	446513	753755	185099	243099	169938	365132	133520	123607	3.35062	1.74443	0.00017212	1	1.63651	up
Com_8783_pos	LPC 9:0	C17 H36 N O7 P	397.222	6.58	398.229	No results	Full match	No results	1.13935e+07	7.80392e+06	7.27539e+06	7.29629e+06	1.55271e+07	9.69931e+06	3.59501e+06	3.10794e+06	2.87301e+06	4.16849e+06	5.01486e+06	4.20172e+06	2.56937	1.36142	0.000175074	1	1.31753	up
Com_4194_pos	Artesunate	C19 H28 O8	203.08	5.683	407.168	Invalid mass	No results	No results	4.53009e+06	3.28085e+06	4.35537e+06	3.30027e+06	4.87277e+06	3.61953e+06	1.6804e+07	8.28653e+06	1.45084e+07	1.01368e+07	2.37572e+07	1.94736e+07	0.257715	-1.95615	0.000177991	1	1.16088	down
Com_7339_pos	(4-benzoylpiperidino)[4-(tert-butyl)phenyl]methanone	C23 H27 N O2	387.165	6.068	388.173	Invalid mass	No results	No results	6.8306e+06	6.76114e+06	7.41045e+06	6.83859e+06	9.80335e+06	6.68211e+06	1.50277e+07	1.94425e+07	1.26412e+07	1.20353e+07	1.8759e+07	2.32778e+07	0.438078	-1.19074	0.000180612	1	1.04422	down
Com_13937_pos	Guanosine 3',5'-Cyclic Monophosphate	C10 H12 N5 O7 P	345.047	2.477	346.055	No results	No results	Full match	1.04891e+06	1.84748e+06	2.86174e+06	2.53563e+06	2.66109e+06	1.64757e+06	5.39869e+06	4.91339e+06	5.48283e+06	6.79092e+06	9.6102e+06	6.80293e+06	0.323148	-1.62973	0.000185329	1	1.47452	down
Com_2144_pos	Diaminopimelic acid	C7 H14 N2 O4	190.095	1.524	191.103	Full match	No results	Full match	2.67838e+07	3.44676e+07	4.49148e+07	4.09365e+07	5.49922e+07	4.69954e+07	7.42288e+07	7.36003e+07	9.04747e+07	9.66438e+07	1.42721e+08	1.29604e+08	0.410178	-1.28568	0.000189789	1	1.47321	down
Com_834_pos	N', N''-DiFeruloylspermidine	C27 H35 N3 O6	497.252	8.67	498.26	No results	No results	Full match	2.69155e+08	1.64474e+08	1.5811e+08	2.16203e+08	2.37103e+08	1.96293e+08	8.15e+06	1.34779e+07	5.7525e+06	1.37636e+07	2.64058e+06	1.11474e+06	27.6471	4.78906	0.000204899	1	1.46928	up
Com_24120_pos	Decursin	C19 H20 O5	328.132	9.227	329.14	No results	No results	Full match	822717	637130	632047	608097	1.1971e+06	877641	2.1509e+06	1.23111e+06	2.17877e+06	1.46995e+06	1.70599e+06	1.83865e+06	0.451495	-1.14722	0.000212353	1	1.0083	down
Com_820_pos	LPC 16:3	C24 H44 N O7 P	489.286	7.886	490.293	No results	Full match	No results	1.89786e+08	2.27669e+08	1.95112e+08	2.80152e+08	2.08314e+08	2.09738e+08	3.89291e+07	7.62128e+07	3.73756e+07	6.31784e+07	3.18997e+07	1.97666e+07	4.90261	2.29355	0.000213883	1	1.09712	up
Com_4014_pos	Ala-Gln	C8 H15 N3 O4	217.106	1.517	218.114	No results	No results	Full match	1.03682e+07	1.61374e+07	2.10802e+07	1.17445e+07	1.60648e+07	1.70786e+07	3.21888e+07	2.84742e+07	3.23992e+07	3.1999e+07	6.0528e+07	5.19327e+07	0.389327	-1.36094	0.000246644	1	1.34126	down
Com_3045_pos	5-Methyluridine	C10 H14 N2 O6	258.085	1.546	276.119	No results	No results	Full match	1.80552e+07	2.01574e+07	2.45184e+07	2.34608e+07	2.98542e+07	2.66584e+07	5.09985e+07	3.85069e+07	5.4135e+07	5.29825e+07	7.52711e+07	9.23282e+07	0.391806	-1.35179	0.00024906	1	1.079	down
Com_2951_pos	Tauroursodeoxycholic acid	C26 H45 N O6 S	499.295	5.866	500.302	No results	No results	Full match	1.21049e+07	1.25862e+07	1.61438e+07	1.36361e+07	2.4983e+07	1.69687e+07	3.3761e+07	6.65719e+07	2.82313e+07	4.14408e+07	4.8864e+07	3.22602e+07	0.383956	-1.38099	0.000250217	1	1.57585	down
Com_16333_pos	PC (16:2/16:2)	C40 H72 N O8 P	743.504	11.354	744.51	No results	Invalid mass	No results	2.21555e+06	3.94366e+06	4.06135e+06	2.52515e+06	1.77405e+06	2.17011e+06	828317	1.28694e+06	1.00038e+06	1.15421e+06	1.0202e+06	525533	2.86985	1.52098	0.000267305	1	1.34079	up
Com_1312_pos	5-trans prostaglandin F2β	C20 H34 O5	376.222	7.335	377.229	Invalid mass	No results	No results	6.28346e+07	6.90148e+07	7.78324e+07	7.92715e+07	9.75709e+07	8.64559e+07	1.93635e+08	1.11272e+08	1.48061e+08	1.59924e+08	2.24657e+08	2.22666e+08	0.446117	-1.16451	0.000274451	1	1.05689	down
Com_4314_pos	Alanyltyrosine	C12 H16 N2 O4	252.111	4.728	253.118	Full match	No results	No results	3.67214e+06	5.89424e+06	6.82122e+06	6.81126e+06	7.45921e+06	7.43672e+06	1.66417e+07	1.20758e+07	1.81371e+07	1.507e+07	3.45591e+07	2.84436e+07	0.304935	-1.71342	0.000275934	1	1.01405	down
Com_1460_pos	LPE 18:4	C23 H40 N O7 P	435.298	8.224	436.306	No results	Invalid mass	No results	1.33898e+08	8.21725e+07	4.49693e+07	9.8453e+07	6.03593e+07	1.10403e+07	7.01004e+06	5.76606e+06	4.09062e+06	9.80652e+06	2.03711e+06	1.23159e+06	14.3909	3.84709	0.000282894	1	1.20763	up
Com_6563_pos	Xanthoxyline	C10 H12 O4	196.071	5.685	197.078	No results	Invalid mass	No results	4.48809e+06	3.01193e+06	3.36594e+06	3.15824e+06	4.97329e+06	3.20961e+06	1.22911e+07	8.24636e+06	1.49838e+07	1.12632e+07	2.27437e+07	2.97876e+07	0.223601	-2.161	0.000294496	1	1.17228	down
Com_16851_pos	DL-methionine sulfoxide	C5 H11 N O3 S	165.04	1.298	166.047	No results	Invalid mass	No results	701175	798769	1.01953e+06	838585	772733	846563	1.57018e+06	2.77895e+06	4.00604e+06	4.13251e+06	5.29414e+06	4.57924e+06	0.22259	-2.16754	0.00031248	1	1.27102	down
Com_4579_pos	Ocfentanil-d5	C22 H22 [2]H5 F N2 O2	375.241	5.482	376.249	Invalid mass	No results	No match	2.74082e+07	2.3966e+07	1.96406e+07	1.57342e+07	1.84461e+07	3.16328e+07	7.79786e+06	6.51912e+06	1.2957e+07	1.24151e+07	1.11523e+07	8.95989e+06	2.28804	1.19411	0.000323184	1	1.47396	up
Com_3969_pos	Dihexyl nonanedioate	C21 H40 O4	263.225	8.5	264.232	Invalid mass	No results	No results	2.18017e+07	3.42193e+07	1.12106e+07	2.34094e+07	4.79296e+06	1.74921e+07	2.53621e+06	1.59762e+06	1.35496e+06	1.82621e+06	2.52541e+06	1.96909e+06	9.5623	3.25736	0.00033837	1	1.70121	up
Com_1294_pos	Glycerophospho-N-palmitoyl ethanolamine	C21 H44 N O7 P	453.285	9.52	454.293	Full match	Full match	Full match	1.56535e+08	4.93629e+07	7.17999e+07	8.34242e+07	5.2074e+07	7.98408e+07	1.6656e+07	3.59818e+07	1.74072e+07	3.03689e+07	1.39987e+07	9.89764e+06	3.96618	1.98775	0.000341831	1	1.2059	up
Com_13542_pos	(2R,3S,4S,5R,6S)-2-(hydroxymethyl)-6-phenoxyoxane-3,4,5-triol	C12 H16 O6	273.121	4.95	274.129	Invalid mass	No results	No results	2.25399e+06	2.76551e+06	2.65169e+06	2.56539e+06	2.57714e+06	2.85587e+06	5.04535e+06	6.26689e+06	6.98695e+06	6.63557e+06	3.60533e+06	6.7389e+06	0.444162	-1.17084	0.000354678	1	1.05535	down
Com_1058_pos	Matrine	C15 H24 N2 O	248.189	4.872	249.196	No results	Full match	Full match	1.05497e+06	1.29944e+06	1.90358e+06	1.64832e+06	2.37221e+06	1.51569e+06	3.00456e+07	1.5837e+07	5.90335e+07	1.02025e+08	2.60637e+08	3.6137e+08	0.0118152	-6.40321	0.000365147	1	1.71224	down
Com_792_pos	Glycyl-L-leucine	C8 H16 N2 O3	188.116	5.22	189.123	Full match	Full match	Full match	9.52063e+07	1.47841e+08	1.8528e+08	1.44069e+08	1.55899e+08	2.005e+08	2.73437e+08	3.05338e+08	2.81424e+08	2.85243e+08	4.57416e+08	5.14511e+08	0.438654	-1.18884	0.000374271	1	1.08924	down
Com_236_pos	LPC 18:4	C26 H46 N O7 P	515.302	8.267	516.309	No results	Full match	No results	1.09969e+09	7.18194e+08	6.05261e+08	9.31583e+08	5.24874e+08	8.57346e+08	3.99178e+07	1.10877e+08	3.62883e+07	6.75523e+07	1.02251e+07	8.7328e+06	17.3138	4.11385	0.000375804	1	1.18739	up
Com_4967_pos	Bevirimat	C36 H56 O6	584.407	10.788	585.415	No results	No results	Full match	1.62032e+07	1.89782e+07	2.50166e+07	2.73846e+07	6.38699e+06	2.33281e+07	2.6787e+06	6.88692e+06	1.48631e+06	4.17873e+06	5.38325e+06	2.81032e+06	5.00753	2.3241	0.000404137	0.972222	1.17963	up
Com_9342_pos	Tropine	C8 H15 N O	141.115	5.59	142.123	No results	No results	Full match	6.29569e+06	6.08975e+06	7.57982e+06	6.03269e+06	9.06001e+06	7.4423e+06	1.64937e+07	8.39411e+06	1.41941e+07	1.57572e+07	1.40766e+07	1.44231e+07	0.509969	-0.971518	0.000411512	0.972222	1.14365	down
Com_23421_pos	(6E,10E)-3,7,11,15-tetramethylhexadeca-1,6,10,14-tetraene-3,5,9-triol	C20 H34 O3	339.276	6.114	340.284	Invalid mass	No results	No match	662853	486630	678959	542263	777680	832566	2.42667e+06	1.29062e+06	3.28127e+06	1.93274e+06	1.34952e+06	1.40249e+06	0.340739	-1.55326	0.00041392	1	1.62231	down
Com_4551_pos	LDGTS 15:1	C25 H47 N O6	457.34	8.617	458.348	No results	Full match	No results	1.99406e+07	2.86902e+07	1.9582e+07	2.93055e+07	1.19399e+07	2.2606e+07	2.83724e+06	9.34278e+06	2.91715e+06	5.57596e+06	1.89151e+06	1.60724e+06	5.46354	2.44984	0.000415084	1	1.2912	up
Com_910_pos	α-Lactose	C12 H22 O11	342.116	1.475	343.124	Full match	Full match	Full match	5.83182e+07	7.45617e+07	7.94922e+07	7.55276e+07	1.88311e+08	7.14917e+07	3.20026e+08	2.97214e+08	3.19893e+08	2.20635e+08	2.69526e+08	2.29869e+08	0.330506	-1.59725	0.000423528	1	1.60833	down
Com_1968_pos	Gly-Val	C7 H14 N2 O3	174.1	3.288	175.108	No results	Full match	Full match	2.83778e+07	5.10127e+07	6.38506e+07	3.89066e+07	4.09659e+07	6.43399e+07	9.00955e+07	9.29324e+07	9.65165e+07	9.78616e+07	1.55942e+08	1.64514e+08	0.411906	-1.27961	0.000424519	1	1.1252	down
Com_2162_pos	N epsilon-(1-Carboxymethyl)-L-lysine	C8 H16 N2 O4	204.111	2.851	205.118	No results	No results	Full match	1.45404e+07	2.50867e+07	3.29446e+07	2.73971e+07	2.13649e+07	3.09516e+07	5.93095e+07	5.19486e+07	6.48748e+07	6.7776e+07	1.40959e+08	1.43304e+08	0.288326	-1.79423	0.000484107	1	1.46262	down
Com_2593_pos	KNH	C16 H27 N7 O5	397.208	5.425	398.215	Full match	No results	No results	2.49202e+07	2.23143e+07	2.10819e+07	9.4911e+06	1.71606e+07	1.60222e+07	8.40725e+07	7.98509e+07	8.52385e+07	5.37592e+07	3.46001e+07	3.30968e+07	0.299474	-1.7395	0.000530576	1	1.1493	down
Com_20934_pos	L-Homocystine	C8 H16 N2 O4 S2	268.056	4.985	269.064	No results	No results	Full match	1.59031e+06	1.976e+06	2.272e+06	2.02097e+06	2.27428e+06	2.44714e+06	3.06705e+06	2.72169e+06	3.23803e+06	3.20692e+06	4.15835e+06	4.38449e+06	0.605525	-0.723742	0.000544416	1	1.27767	down
Com_2860_pos	5-{[(cyclododecylideneamino)oxy]carbonyl}-4-methyl-1,2,3-thiadiazole	C16 H25 N3 O2 S	301.189	6.068	302.196	Invalid mass	No results	No results	1.20595e+07	1.73251e+07	2.59567e+07	2.45571e+07	2.76845e+07	2.23544e+07	7.93049e+07	3.15012e+07	8.93844e+07	8.1296e+07	5.39041e+07	4.84992e+07	0.338476	-1.56288	0.000551546	1	1.57975	down
Com_30547_pos	Ergothioneine	C9 H15 N3 O2 S	229.089	4.954	230.096	No results	No results	Full match	100769	296323	298294	195389	205414	282711	628428	526695	1.03062e+06	538810	707158	518529	0.349067	-1.51842	0.000552752	1	1.55627	down
Com_13548_pos	Taurochenodeoxycholic acid	C26 H45 N O6 S	481.282	7.748	482.289	Invalid mass	No results	No results	1.71864e+06	1.98262e+06	529357	1.38952e+06	1.87588e+06	1.69666e+06	5.91273e+06	4.21948e+06	7.83755e+06	3.41891e+06	5.73368e+06	4.65279e+06	0.289304	-1.78934	0.000572845	1	1.29264	down
Com_14649_pos	Levodopa	C9 H11 N O4	197.069	5.472	198.076	No results	No results	Full match	2.40744e+06	2.9848e+06	3.88186e+06	3.72199e+06	4.52219e+06	3.6463e+06	4.7876e+06	6.17356e+06	5.89444e+06	7.39669e+06	5.75905e+06	8.23898e+06	0.553318	-0.85382	0.000600101	1	1.47346	down
Com_2817_pos	1-Aminocyclopropanecarboxylic acid	C4 H7 N O2	101.048	1.535	102.055	No results	No results	Full match	3.11456e+07	2.89324e+07	4.29292e+07	3.52768e+07	3.79544e+07	4.10126e+07	7.51347e+07	7.19151e+07	8.44531e+07	4.92089e+07	7.90497e+07	4.89307e+07	0.531576	-0.911653	0.000616034	1	1.19338	down
Com_13960_pos	LDGTS 19:0	C29 H57 N O6	515.417	10.793	516.424	No results	Full match	No results	3.26986e+06	4.63048e+06	5.06717e+06	5.67589e+06	2.22486e+06	2.20615e+06	709067	1.7603e+06	681221	1.16458e+06	467036	298526	4.54155	2.18319	0.000635974	1	1.53447	up
Com_7956_pos	Ganoderic acid H	C32 H44 O9	572.297	6.663	573.303	No results	No results	Full match	3.51811e+06	1.11212e+07	5.44103e+06	5.20662e+06	4.32329e+06	5.35684e+06	1.42975e+07	9.20565e+06	1.23014e+07	1.83123e+07	1.96491e+07	2.49416e+07	0.354249	-1.49716	0.000640645	0.972222	1.49509	down
Com_1038_pos	Ala-Ile	C9 H18 N2 O3	202.132	5.205	203.139	No results	Full match	Full match	5.76863e+07	7.05734e+07	1.0401e+08	9.4725e+07	9.06004e+07	1.06417e+08	1.69095e+08	1.48082e+08	1.81381e+08	2.10548e+08	3.58712e+08	3.45665e+08	0.370723	-1.43158	0.000648802	1	1.30474	down
Com_23507_pos	Oleanic acid	C30 H48 O3	456.361	9.754	457.368	No results	No results	Full match	1.28588e+06	1.73349e+06	1.74124e+06	1.02022e+06	808645	811310	356909	713746	334602	582127	249395	263447	2.96005	1.56562	0.000651854	1	1.13548	up
Com_3038_pos	Oxymatrine	C15 H24 N2 O2	264.184	5.044	265.191	Full match	Full match	Full match	823274	1.00975e+06	1.108e+06	1.08683e+06	1.1144e+06	1.24313e+06	1.23168e+07	6.32426e+06	1.6168e+07	2.82334e+07	7.98313e+07	9.26337e+07	0.0271132	-5.20486	0.000674095	1	1.43574	down
Com_17253_pos	trans-Zeatin-riboside	C15 H21 N5 O5	351.155	5.483	352.162	No results	No results	Full match	819295	649326	397471	643409	1.14584e+06	1.43031e+06	2.36915e+06	4.62941e+06	2.43329e+06	1.75943e+06	2.53313e+06	1.96647e+06	0.324115	-1.62542	0.000687125	1	1.37791	down
Com_10638_pos	3-(cyclopropylmethyl)-2-mercaptoquinazolin-4(3H)-one	C12 H12 N2 O S	232.069	5.879	233.076	Invalid mass	No results	No results	1.85221e+06	1.8343e+06	1.53654e+06	252652	301980	234273	1.68881e+07	5.6445e+06	1.38019e+07	9.37395e+06	9.79011e+06	1.36191e+07	0.0869815	-3.52315	0.000688048	1	1.64514	down
Com_386_pos	LDGTS 15:0	C25 H49 N O6	459.356	9.193	460.363	No results	Full match	No results	6.64816e+08	5.87448e+08	5.66679e+08	5.03552e+08	2.5344e+08	3.93822e+08	4.55423e+07	1.49427e+08	4.4747e+07	1.01399e+08	2.0894e+07	1.44085e+07	7.88952	2.97994	0.000739483	1	1.1659	up
Com_5798_pos	Anacardic Acid	C22 H36 O3	348.266	9.784	349.273	No results	No results	Full match	2.1944e+07	1.72877e+07	1.63075e+07	8.68027e+06	7.70264e+06	9.0913e+06	3.09417e+06	5.02571e+06	3.3098e+06	5.85354e+06	1.62635e+06	1.49222e+06	3.9709	1.98946	0.000752461	1	1.4519	up
Com_2119_pos	D-Erythrose 4-phosphate	C4 H9 O7 P	200.009	1.33	201.016	No results	No results	Full match	1.49417e+07	1.7583e+07	1.91896e+07	2.03055e+07	2.343e+07	1.84832e+07	5.27891e+07	1.04999e+08	6.44846e+07	5.39691e+07	2.94299e+07	4.9171e+07	0.32108	-1.63899	0.000805177	1	1.00644	down
Com_10040_pos	LPE 14:0	C19 H40 N O7 P	425.255	8.615	426.262	No results	Full match	Full match	9.72323e+06	8.35927e+06	7.61844e+06	5.49433e+06	8.2752e+06	6.23066e+06	1.84549e+06	3.51177e+06	2.44498e+06	3.70519e+06	1.57548e+06	1.02904e+06	3.23847	1.69531	0.000812584	1	1.0234	up
Com_7699_pos	Tetrahydrocortisone	C21 H32 O5	364.225	8.38	365.232	Full match	No results	No results	1.2771e+07	1.14296e+07	1.12238e+07	1.09822e+07	1.01297e+07	1.55151e+07	3.62928e+06	5.99899e+06	3.60936e+06	4.40313e+06	1.698e+06	1.89455e+06	3.39331	1.7627	0.000821734	1	1.50568	up
Com_27206_pos	Tenuifoliside B	C30 H36 O17	668.194	8.905	669.201	No results	No results	Full match	222454	218188	174543	230494	145117	146301	127514	124917	98800.3	113246	75564.9	74499	1.85031	0.88777	0.00083892	1	1.40194	up
Com_665_pos	2,3-Dinor-11β-prostaglandin F2α	C18 H30 O5	326.209	7.103	327.217	Full match	No results	No results	2.28537e+08	2.82919e+08	3.25788e+08	2.80466e+08	4.4967e+08	2.76656e+08	2.16194e+08	2.06638e+08	1.5805e+08	1.47749e+08	1.68159e+08	1.39668e+08	1.77917	0.831204	0.000847429	1	1.0388	up
Com_5220_pos	7-Methylguanine	C6 H7 N5 O	165.065	2.246	166.072	Full match	No results	Full match	1.54151e+07	1.73787e+07	1.8994e+07	1.96271e+07	2.61369e+07	2.63471e+07	3.11697e+07	2.92088e+07	3.21395e+07	3.43184e+07	4.34059e+07	3.7868e+07	0.595352	-0.748185	0.000863738	1	1.1036	down
Com_4915_pos	Ambroxane	C16 H28 O	236.214	8.633	237.221	No results	No results	Full match	2.00143e+07	2.60955e+07	2.3875e+07	2.3288e+07	1.04443e+07	1.76161e+07	3.30786e+06	6.29913e+06	2.99145e+06	5.37934e+06	1.13053e+06	927405	6.05585	2.59833	0.000882237	1	1.38927	up
Com_7586_pos	Glu-Val-Phe	C19 H27 N3 O6	393.19	5.615	394.198	No results	Full match	No results	6.80178e+06	8.60182e+06	9.39194e+06	8.27153e+06	1.13096e+07	8.59286e+06	1.52169e+07	1.64113e+07	1.25962e+07	1.5764e+07	2.56754e+07	2.6123e+07	0.473845	-1.07751	0.00092754	1	1.45867	down
Com_7296_pos	Prostaglandin E1	C20 H34 O5	336.229	6.793	337.237	Invalid mass	No results	No results	8.55335e+06	8.75586e+06	8.29214e+06	9.40244e+06	9.42863e+06	8.47315e+06	1.28795e+07	1.70073e+07	1.6203e+07	2.28813e+07	2.06802e+07	1.2811e+07	0.516342	-0.9536	0.000947393	1	1.37918	down
Com_1117_pos	Cytidine	C9 H13 N3 O5	243.085	1.724	244.093	Full match	Full match	Full match	3.86303e+07	6.03861e+07	7.29917e+07	7.67807e+07	1.0683e+08	1.90849e+07	2.11136e+08	2.34821e+08	2.09288e+08	2.76017e+08	3.28822e+08	3.33852e+08	0.235081	-2.08877	0.000961822	1	1.5776	down
Com_353_pos	L-Glutathione oxidized	C20 H32 N6 O12 S2	612.152	2.371	307.083	Full match	Full match	Full match	2.76861e+08	3.92345e+08	6.62187e+08	3.24973e+08	4.25525e+08	7.99034e+08	1.86267e+07	3.94271e+07	1.58241e+07	1.92227e+07	1.30754e+08	1.32062e+08	8.09438	3.01692	0.000966927	1	1.60302	up
Com_848_pos	7α-Hydroxytestosterone	C19 H28 O3	304.204	11.77	305.211	Full match	No results	No results	2.64582e+08	6.48059e+07	6.44379e+07	6.99723e+07	3.94827e+07	6.81467e+07	1.32682e+07	3.16884e+07	1.60215e+07	1.64477e+07	3.86842e+06	5.85383e+06	6.55698	2.71303	0.00101158	1	1.46576	up
Com_25581_pos	LPC(1-acyl 18:2)	C26 H50 N O7 P	519.332	9.979	520.339	No results	No results	Full match	1.39128e+06	1.05768e+06	1.10511e+06	1.41083e+06	780954	1.17684e+06	550333	670053	379112	594121	270633	259137	2.54195	1.34593	0.00101414	1	1.33292	up
Com_9165_pos	Monensin	C36 H62 O11	692.411	9.259	693.418	Invalid mass	No results	No results	1.11501e+07	1.35192e+06	2.60636e+06	2.73018e+06	2.52503e+06	1.55509e+06	462978	1.08716e+06	386325	510718	144588	135273	8.03754	3.00675	0.0010232	1	1.45092	up
Com_16510_pos	LDGTS 19:2	C29 H53 N O6	511.388	9.505	512.395	No results	Full match	No results	2.69695e+06	3.90308e+06	3.51591e+06	3.06755e+06	2.19405e+06	2.51099e+06	557755	964138	412587	815429	415234	125994	5.43537	2.44238	0.00103052	1	1.38349	up
Com_7055_pos	Tetrahydropapaverine	C20 H25 N O4	343.178	6.921	366.167	No results	No results	Full match	3.38945e+06	2.20893e+06	2.8028e+06	1.04881e+06	2.55018e+06	1.56746e+06	2.1557e+07	1.31361e+07	2.11368e+07	2.39775e+07	6.78494e+06	3.77122e+06	0.150145	-2.73557	0.00103083	1	1.24132	down
Com_1879_pos	N-Acetylornithine	C7 H14 N2 O3	174.1	2.246	175.108	Full match	Full match	Full match	1.99005e+07	2.96426e+07	4.12486e+07	3.36297e+07	4.11452e+07	3.82799e+07	6.36512e+07	5.73855e+07	8.57392e+07	9.08706e+07	1.52436e+08	1.7408e+08	0.326592	-1.61444	0.00105101	1	1.54772	down
Com_5020_pos	Mupirocin	C26 H44 O9	522.28	8.323	523.287	Invalid mass	No results	No results	2.63964e+07	1.57315e+07	8.94078e+06	1.45485e+07	1.09128e+07	1.48958e+07	1.47738e+06	1.86863e+06	876650	2.19151e+06	167731	168503	13.5437	3.75955	0.0010556	1	1.33938	up
Com_751_pos	9-Oxo-ODE	C18 H30 O3	294.219	7.116	295.226	Full match	No results	Full match	1.52089e+08	1.94357e+08	2.13437e+08	2.25058e+08	3.19921e+08	2.32433e+08	3.09512e+08	3.20704e+08	3.81704e+08	4.37756e+08	5.19207e+08	5.46376e+08	0.531673	-0.91139	0.00107271	0.972222	1.30184	down
Com_1808_pos	Riboflavin	C17 H20 N4 O6	376.138	5.404	377.146	Full match	Full match	Full match	1.03453e+07	5.14455e+06	3.91778e+06	3.87834e+06	2.64308e+07	7.16239e+06	5.17552e+07	4.58334e+07	4.66536e+07	5.57143e+07	5.88132e+07	5.02622e+07	0.184056	-2.44179	0.00116699	1	1.0623	down
Com_6416_pos	3-hydroxy-1,5-diphenylpentan-1-one	C17 H18 O2	276.111	5.3	277.118	Invalid mass	No results	No results	2.78833e+06	3.78916e+06	4.83934e+06	4.7098e+06	7.59914e+06	7.27428e+06	1.03401e+07	8.21161e+06	1.15864e+07	1.3544e+07	2.39058e+07	2.14182e+07	0.348292	-1.52163	0.00119387	1	1.03628	down
Com_12421_pos	Orsellinic acid	C8 H8 O4	168.042	5.158	169.05	No results	Full match	Full match	4.93599e+06	4.84513e+06	4.63968e+06	5.35094e+06	7.08041e+06	7.28853e+06	3.72002e+06	1.62171e+06	2.91874e+06	2.67716e+06	2.41109e+06	3.70904e+06	2.00148	1.00106	0.00121954	1	1.66209	up
Com_53_pos	LDGTS 16:4	C26 H43 N O6	465.309	7.656	466.316	No results	Full match	No results	4.23278e+09	4.38084e+09	3.71114e+09	4.77796e+09	2.65729e+09	3.83694e+09	5.80319e+08	5.84215e+08	2.81709e+08	4.20853e+08	3.87454e+07	9.69245e+07	11.7822	3.55853	0.00127584	1	1.15072	up
Com_15160_pos	Pseudoephedrine	C10 H15 N O	165.115	6.85	166.123	No results	No results	Full match	3.13271e+06	3.61693e+06	4.69646e+06	4.45364e+06	5.77127e+06	3.71942e+06	2.34672e+06	2.30082e+06	3.08012e+06	2.18025e+06	2.38115e+06	2.93557e+06	1.66772	0.737878	0.00128116	1	1.29723	up
Com_2270_pos	4-Phenylbutyric acid	C10 H12 O2	164.084	6.969	165.091	Full match	Full match	Full match	3.18238e+07	3.30707e+07	5.34569e+07	4.55563e+07	5.0105e+07	4.85015e+07	6.31125e+07	5.69794e+07	8.42177e+07	6.61673e+07	8.91923e+07	9.21586e+07	0.581005	-0.783378	0.00128667	1	1.02208	down
Com_2876_pos	N-(4-butyl-2-methylphenyl)-N'-[4-(4-methylpiperazino)phenyl]urea	C23 H32 N4 O	380.254	7.312	381.261	Invalid mass	No results	No results	5.55933e+07	4.8374e+07	4.59968e+07	4.04418e+07	2.86168e+07	3.05789e+07	1.28654e+07	2.67087e+07	1.64153e+07	1.85097e+07	1.57656e+07	7.22136e+06	2.56038	1.35636	0.00134345	1	1.40381	up
Com_27454_pos	Cinnamyl acetate	C11 H12 O2	176.084	7.435	177.091	No results	No results	Full match	863278	522671	466295	686460	925106	951046	1.21213e+06	1.33178e+06	1.41791e+06	1.33869e+06	1.68818e+06	1.67968e+06	0.509306	-0.973395	0.00136715	1	1.01298	down
Com_3461_pos	α-Aspartylphenylalanine	C13 H16 N2 O5	280.106	5.318	281.113	Full match	Full match	Full match	8.35776e+06	1.35427e+07	1.47433e+07	1.36742e+07	1.92947e+07	1.73847e+07	3.09653e+07	2.68992e+07	3.17422e+07	2.9822e+07	6.7905e+07	7.76846e+07	0.328269	-1.60705	0.00138398	1	1.4723	down
Com_4922_pos	D-Alanyl-D-alanine	C6 H12 N2 O3	160.085	1.531	161.092	Full match	No results	Full match	1.32812e+07	1.60761e+07	2.05119e+07	2.15757e+07	2.60121e+07	2.42685e+07	2.98657e+07	2.94917e+07	3.38049e+07	3.38006e+07	4.68088e+07	4.22579e+07	0.563467	-0.827597	0.00139236	1	1.08546	down
Com_60_pos	(3beta,9xi)-3-(beta-D-Glucopyranosyloxy)-14-hydroxycard-20(22)-enolide	C29 H44 O9	536.296	8.733	537.304	Full match	No results	No results	4.43431e+09	2.95041e+09	2.28304e+09	3.41816e+09	2.91248e+09	3.70935e+09	1.68294e+08	3.34241e+08	1.24385e+08	2.75086e+08	1.11041e+07	1.89481e+07	21.1443	4.4022	0.00142098	1	1.1834	up
Com_15866_pos	Geranylgeraniol	C20 H34 O	290.261	10.205	291.268	No results	No results	Full match	4.27084e+06	4.21592e+06	3.54885e+06	3.53507e+06	753303	3.00093e+06	417790	1.54686e+06	390100	837013	232157	227294	5.29274	2.40401	0.00143732	0.944444	1.34141	up
Com_2097_pos	L-5-Hydroxytryptophan	C11 H12 N2 O3	220.085	2.817	221.092	Full match	No results	Full match	2.46076e+07	5.02958e+07	6.44831e+07	7.41626e+07	8.20261e+07	9.08808e+07	1.49006e+07	1.55293e+07	1.41319e+07	1.44073e+07	3.56229e+07	2.95858e+07	3.11212	1.6379	0.00144144	0.944444	1.41573	up
Com_2606_pos	Dihydrojasmone	C11 H18 O	166.136	6.403	167.143	No results	No results	Full match	4.19817e+07	5.25661e+07	6.30345e+07	5.77714e+07	7.96261e+07	5.91126e+07	2.8967e+07	3.7234e+07	3.24918e+07	2.84418e+07	3.99873e+07	4.67082e+07	1.65595	0.727662	0.00161443	0.972222	1.47414	up
Com_11353_pos	Methyl linoleate	C19 H34 O2	294.255	9.701	295.263	No results	No results	Full match	7.26591e+06	7.66995e+06	6.68468e+06	7.76762e+06	4.01218e+06	6.18351e+06	2.60915e+06	5.07039e+06	2.2106e+06	3.35656e+06	2.07985e+06	1.56259e+06	2.34375	1.22882	0.00163577	0.972222	1.46762	up
Com_1809_pos	Ala-Val	C8 H16 N2 O3	188.116	3.025	189.123	No results	Full match	Full match	2.07683e+07	3.20024e+07	4.26325e+07	3.75119e+07	3.13645e+07	4.69041e+07	6.41745e+07	6.54396e+07	7.46015e+07	7.64396e+07	1.7505e+08	1.63922e+08	0.340824	-1.5529	0.00164479	1	1.23725	down
Com_8897_pos	17beta-Trenbolone	C18 H22 O2	270.158	5.214	271.165	Invalid mass	No results	No results	5.45923e+06	8.62274e+06	8.44667e+06	8.20731e+06	9.64185e+06	7.71947e+06	9.23556e+06	1.45218e+07	1.13916e+07	1.56522e+07	1.71351e+07	1.37186e+07	0.589032	-0.763583	0.00166429	0.972222	1.03576	down
Com_5038_pos	Cocamidopropyl betaine	C19 H38 N2 O3	342.288	7.476	343.295	No results	No results	Full match	5.2282e+06	5.87618e+06	5.99186e+06	9.56275e+06	2.35019e+07	6.46604e+06	2.49343e+07	1.50499e+07	2.46009e+07	2.5504e+07	4.546e+07	4.56198e+07	0.312564	-1.67778	0.00175299	0.972222	1.48377	down
Com_11407_pos	Dehydroeffusol	C17 H14 O2	250.099	3.82	251.106	No results	No results	Full match	810048	1.11789e+06	1.66192e+06	1.30789e+06	1.26221e+06	1.19943e+06	2.66625e+06	2.28224e+06	3.22872e+06	3.15419e+06	7.42504e+06	8.01102e+06	0.274938	-1.86282	0.00175992	1	1.07518	down
Com_1548_pos	LNK	C16 H31 N5 O5	188.116	2.204	189.123	Invalid mass	No results	No match	2.05693e+07	3.59427e+07	4.85934e+07	4.113e+07	3.99952e+07	5.05361e+07	7.1875e+07	7.75993e+07	8.99282e+07	9.3488e+07	2.1429e+08	2.24052e+08	0.306998	-1.7037	0.00183759	1	1.14928	down
Com_5385_pos	5-Hydroxyindole-3-acetic acid	C10 H9 N O3	191.058	4.88	192.066	Full match	Full match	Full match	6.24326e+06	7.99224e+06	1.0251e+07	8.20785e+06	1.2059e+07	1.18216e+07	2.38039e+07	1.28298e+07	2.66296e+07	1.7016e+07	3.85071e+07	4.31697e+07	0.349323	-1.51737	0.00195924	1	1.42936	down
Com_1489_pos	L-Cysteine-glutathione gisulfide	C13 H22 N4 O8 S2	426.088	1.505	427.095	No results	No results	Full match	9.54086e+07	9.89206e+07	1.08576e+08	9.18255e+07	1.32258e+08	1.39927e+08	2.5414e+07	3.28654e+07	2.34938e+07	2.19251e+07	6.22721e+07	7.13899e+07	2.80972	1.49043	0.00202486	1	1.18509	up
Com_15919_pos	2-[(3S)-1-(4-Fluorobenzyl)-3-pyrrolidinyl]-5-methyl-1H-benzimidazole	C19 H20 F N3	309.169	4.104	310.176	Invalid mass	No results	No results	987033	1.50759e+06	1.16695e+06	519212	911916	751414	1.9014e+06	1.54075e+06	2.84096e+06	3.79483e+06	7.5264e+06	4.89597e+06	0.259735	-1.94489	0.00203151	1	1.13401	down
Com_5684_pos	Lysopc 14:0	C22 H46 N O7 P	467.301	9.551	468.309	No results	No results	Full match	5.5961e+06	3.5074e+06	3.58848e+06	4.85344e+06	2.13869e+06	3.20323e+06	1.28018e+07	2.80966e+07	1.2235e+07	2.26557e+07	9.02148e+06	5.40556e+06	0.253695	-1.97884	0.00203643	0.972222	1.09448	down
Com_16664_pos	N-Phenylacetylglycine	C10 H11 N O3	193.074	5.645	194.081	No results	No results	Full match	2.63946e+06	3.67195e+06	3.00199e+06	2.86181e+06	2.77608e+06	2.99156e+06	7.59137e+06	4.0681e+06	6.41807e+06	4.44408e+06	4.05492e+06	5.30195e+06	0.562851	-0.829175	0.00211135	1	1.38942	down
Com_1926_pos	1,2-Dipalmitoylphosphatidylglycerol	C38 H75 O10 P	744.48	11.706	745.488	Invalid mass	No results	No results	9.40423e+07	3.69482e+07	3.90174e+07	5.28075e+07	3.0132e+07	5.51878e+07	1.6886e+07	1.57221e+07	1.66199e+07	1.62095e+07	2.96216e+06	9.71833e+06	3.94448	1.97984	0.00213016	1	1.45311	up
Com_16431_pos	S-(-)-Cotinine	C10 H12 N2 O	176.095	5.29	177.102	No results	No results	Full match	1.59714e+06	1.6375e+06	2.52967e+06	1.84894e+06	2.17875e+06	2.29872e+06	3.70416e+06	3.11712e+06	3.20673e+06	3.8974e+06	7.08058e+06	7.0342e+06	0.431192	-1.2136	0.0021365	1	1.38139	down
Com_15100_pos	FNK	C19 H29 N5 O5	385.233	5.096	386.24	Invalid mass	No results	No results	1.59933e+06	2.74749e+06	3.8224e+06	4.22084e+06	2.5185e+06	5.14051e+06	1.11985e+06	1.42032e+06	884867	944220	1.43039e+06	2.144e+06	2.52391	1.33566	0.00228249	0.972222	1.51743	up
Com_20738_pos	2-[(3S)-1-(2-Thienylmethyl)-3-pyrrolidinyl]-1,3-benzoxazole	C16 H16 N2 O S	131.059	6.581	285.107	Invalid mass	No results	No results	1.12216e+06	1.17673e+06	880158	700854	1.14129e+06	1.36797e+06	3.14073e+06	1.73216e+06	3.09259e+06	1.33748e+06	3.20014e+06	4.47379e+06	0.376344	-1.40987	0.002446	0.972222	1.46482	down
Com_9854_pos	N1,N10-Dicoumaroyl spermidine	C25 H31 N3 O4	437.232	5.441	438.239	No results	No results	Full match	718017	894827	694588	832589	1.72743e+06	836265	2.43478e+06	2.63217e+06	2.8405e+06	1.17608e+07	6.51661e+06	1.79183e+07	0.129327	-2.95091	0.00245334	1	1.42022	down
Com_8639_pos	HKK	C18 H33 N7 O4	393.251	5.611	394.258	Invalid mass	No results	No results	7.52527e+06	1.0969e+07	1.20019e+07	8.14557e+06	8.28958e+06	9.68151e+06	3.87307e+06	3.44167e+06	5.61928e+06	4.60418e+06	7.14602e+06	6.75039e+06	1.80097	0.848774	0.00246007	1	1.16061	up
Com_7615_pos	PC (16:2e/4:0)	C28 H54 N O7 P	547.364	9.904	548.372	No results	Full match	Full match	1.82029e+06	1.87036e+06	2.23691e+06	2.52371e+06	1.69439e+06	2.0487e+06	1.03836e+07	1.84041e+07	1.2344e+07	1.6753e+07	4.01022e+06	3.89062e+06	0.185365	-2.43156	0.00246861	1	1.69717	down
Com_1349_pos	Gly-Phe	C11 H14 N2 O3	222.1	5.282	223.108	No results	No results	Full match	4.68108e+07	5.91031e+07	7.87511e+07	6.06994e+07	7.73619e+07	9.12931e+07	1.19789e+08	1.03923e+08	1.21944e+08	1.23194e+08	2.28636e+08	2.63035e+08	0.431036	-1.21412	0.00249718	1	1.44016	down
Com_7213_pos	Neotuberostemonine	C22 H33 N O4	375.24	6.625	376.247	No results	No results	Full match	1.20021e+07	1.24287e+07	1.53478e+07	1.26676e+07	2.08907e+07	8.96938e+06	4.95283e+06	6.12601e+06	6.19497e+06	7.2593e+06	1.19729e+07	5.19078e+06	1.97392	0.981066	0.00268446	0.972222	1.21002	up
Com_3224_pos	Oleic Acid	C18 H34 O2	282.256	10.259	283.263	No results	No results	Full match	4.78222e+07	3.09282e+07	3.07692e+07	2.96281e+07	1.015e+07	2.42726e+07	7.0212e+06	1.80143e+07	7.39836e+06	1.15085e+07	4.10577e+06	4.43387e+06	3.30723	1.72562	0.00270162	0.944444	1.16701	up
Com_25309_pos	DKK	C16 H31 N5 O6	411.212	4.21	412.219	Invalid mass	No results	No results	468146	388215	1.31057e+06	1.28028e+06	1.87991e+06	866366	241329	198992	232001	206074	396162	252389	4.05613	2.0201	0.00272347	0.972222	1.60951	up
Com_7130_pos	L-Kynurenine	C10 H12 N2 O3	208.085	4.883	209.092	Full match	Full match	Full match	4.22262e+06	5.93155e+06	7.37903e+06	5.88287e+06	8.06729e+06	8.35892e+06	1.61876e+07	8.37216e+06	1.88583e+07	1.17494e+07	2.62726e+07	2.91859e+07	0.360153	-1.47332	0.00272426	1	1.30994	down
Com_1268_pos	Methyl dihydrojasmonate	C13 H22 O3	226.157	6.281	227.164	Full match	No results	Full match	7.13995e+07	1.02278e+08	1.58435e+08	1.17381e+08	1.68403e+08	1.49861e+08	4.59576e+07	6.00864e+07	7.38576e+07	5.36463e+07	8.12848e+07	7.38845e+07	1.9751	0.981929	0.00284458	0.916667	1.05284	up
Com_10381_pos	Aucubin	C15 H22 O9	346.127	1.205	347.134	No results	No results	Full match	5.26732e+06	5.29156e+06	5.76141e+06	5.3074e+06	5.3575e+06	4.68665e+06	9.05272e+06	7.87447e+06	9.69731e+06	7.63201e+06	1.40438e+07	1.65424e+07	0.488441	-1.03374	0.00296093	1	1.38986	down
Com_5707_pos	Tetrahydropiperine	C17 H23 N O3	289.164	5.263	290.171	No results	Invalid mass	No results	9.01237e+06	1.36194e+07	1.75724e+07	1.577e+07	1.94162e+07	1.48555e+07	2.44028e+07	2.13181e+07	2.29204e+07	2.22768e+07	3.71753e+07	4.01956e+07	0.536256	-0.899006	0.0029661	1	1.04877	down
Com_2836_pos	Polypodine B	C27 H44 O8	496.304	8.55	497.311	No results	No results	Full match	4.45271e+07	5.47444e+07	1.1892e+07	4.34291e+07	2.11374e+07	2.32109e+07	3.18893e+06	6.94039e+06	2.93076e+06	5.88879e+06	312886	359919	10.1388	3.34182	0.00304126	1	1.15676	up
Com_4923_pos	Isomucronulatol	C17 H18 O5	302.116	8.869	303.124	No results	No results	Full match	1.19591e+07	1.33964e+07	1.46383e+07	1.18529e+07	1.63736e+07	2.88464e+07	2.20683e+06	2.34613e+06	1.80702e+06	1.06259e+07	4.26791e+06	6.87773e+06	3.45046	1.78679	0.00307327	1	1.01514	up
Com_1244_pos	1-Stearoylglycerol	C21 H42 O4	358.308	10.915	359.315	Full match	No results	No results	8.14728e+07	2.19908e+07	2.43454e+07	3.55783e+07	3.97483e+07	3.89959e+07	5.27056e+07	1.07209e+08	1.39599e+08	1.6913e+08	6.98318e+07	1.07215e+08	0.374996	-1.41505	0.00309678	0.944444	1.02958	down
Com_10117_pos	PC (18:5e/4:0)	C30 H52 N O7 P	569.348	9.436	570.355	No results	Full match	No results	4.09611e+06	5.6441e+06	9.41513e+06	7.71e+06	4.30818e+06	5.34572e+06	1.73517e+06	4.76656e+06	1.18702e+06	2.95432e+06	1.23337e+06	1.12563e+06	2.80872	1.48992	0.00328597	0.944444	1.19875	up
Com_17577_pos	YNK	C19 H29 N5 O6	846.412	4.934	424.213	Invalid mass	No results	No results	411012	1.87316e+06	2.5033e+06	3.13553e+06	4.67501e+06	1.43993e+06	392616	261187	320199	238512	400378	496099	6.65624	2.73471	0.00329416	0.972222	1.43299	up
Com_5514_pos	KKK	C18 H38 N6 O4	384.288	9.183	385.295	Invalid mass	No results	No results	2.34327e+07	1.75706e+07	6.60907e+06	1.66536e+07	7.16198e+06	1.38916e+07	3.08431e+06	5.58898e+06	2.40056e+06	3.77534e+06	514744	665536	5.32267	2.41215	0.00332644	1	1.2106	up
Com_1595_pos	(-)-secoisolariciresinol	C20 H26 O6	362.172	5.783	380.206	No results	No results	Full match	2.01439e+07	5.65822e+06	3.32458e+07	2.0875e+07	2.2081e+07	1.95403e+07	1.48658e+08	1.07094e+08	3.42772e+07	2.88699e+07	1.31733e+08	1.44594e+08	0.204199	-2.29196	0.00347302	0.972222	1.0798	down
Com_5286_pos	2-Benzyl-5-[(3S)-1-isopropyl-3-pyrrolidinyl]-1,3,4-oxadiazole	C16 H21 N3 O	271.164	1.769	272.171	Invalid mass	No results	No results	7.03211e+06	9.37763e+06	1.17416e+07	1.00816e+07	1.03819e+07	1.139e+07	1.48676e+07	1.71232e+07	2.11046e+07	1.98032e+07	4.28235e+07	4.35488e+07	0.376748	-1.40833	0.0038484	1	1.12446	down
Com_9444_pos	LNH	C16 H26 N6 O5	382.196	7.708	383.204	Full match	No results	No results	1.85894e+06	1.49242e+06	2.13549e+06	2.0092e+06	2.13975e+06	1.54909e+06	7.39688e+06	2.57688e+06	4.90461e+06	8.27368e+06	1.84683e+07	1.3848e+07	0.201645	-2.31011	0.00385509	1	1.35585	down
Com_2558_pos	2,6-Di-tert-butyl-1,4-benzoquinone	C14 H20 O2	220.146	6.659	221.153	Full match	No results	No results	3.13405e+07	2.87547e+07	3.94718e+07	3.89221e+07	4.8115e+07	4.05328e+07	5.98936e+07	4.57361e+07	6.30374e+07	6.18792e+07	1.03194e+08	1.05369e+08	0.517268	-0.951015	0.00387187	0.972222	1.06117	down
Com_1480_pos	LDGTS 17:0	C27 H53 N O6	487.387	10.05	488.394	No results	Full match	No results	1.3199e+08	1.23501e+08	1.01731e+08	9.85887e+07	7.85762e+07	7.27516e+07	3.31823e+07	6.72043e+07	3.82796e+07	5.17761e+07	2.28251e+07	1.3802e+07	2.6738	1.41889	0.00396249	1	1.11731	up
Com_4776_pos	4-(cyclohexylmethyl)-6-(2-thienyl)-2,3-dihydropyridazin-3-one hydrate	C15 H18 N2 O S	296.101	2.419	297.108	Invalid mass	No results	No results	7.05164e+06	1.13646e+07	1.329e+07	9.70887e+06	1.10266e+07	1.24979e+07	1.9187e+07	1.87162e+07	2.11314e+07	1.8601e+07	4.85149e+07	5.04691e+07	0.367681	-1.44347	0.00404718	1	1.00426	down
Com_7492_pos	TriacetonaMine	C9 H17 N O	155.131	5.207	156.138	No results	No results	Full match	2.68171e+06	2.82538e+06	4.43413e+06	3.08526e+06	2.6391e+06	2.57949e+06	1.7818e+07	9.86486e+06	1.92112e+07	2.19646e+07	3.12626e+06	1.3707e+07	0.212915	-2.23165	0.004133	0.972222	1.37054	down
Com_3775_pos	gamma-Glutamylmethionine	C10 H18 N2 O5 S	261.067	4.948	262.074	No results	Invalid mass	No results	2.50527e+07	1.53839e+07	3.71908e+07	1.41468e+07	3.01963e+07	1.8257e+07	4.63949e+07	4.73502e+07	4.4325e+07	5.12531e+07	4.19001e+07	5.15314e+07	0.495933	-1.01178	0.00425399	1	1.01357	down
Com_30835_pos	Menadione	C11 H10 O5 S	254.025	1.247	255.032	No results	No results	Full match	98972.3	95216.1	110485	97200.1	113322	109231	161631	121794	168087	136729	216866	233873	0.600999	-0.734566	0.00439509	1	1.14977	down
Com_4710_pos	Taurochenodeoxycholic Acid (sodium salt)	C26 H45 N O6 S	464.253	5.698	465.261	Invalid mass	No results	No results	1.56897e+07	2.71677e+07	2.81147e+07	2.09542e+07	2.40843e+07	2.13214e+07	1.17475e+07	1.56432e+07	1.03839e+07	1.91695e+07	7.11018e+06	1.01356e+07	1.85109	0.888373	0.00439737	0.972222	1.17353	up
Com_143_pos	Denin	C33 H56 O14	676.367	8.41	677.372	No results	No results	Full match	1.93561e+09	1.62188e+09	1.17439e+09	1.72961e+09	1.08585e+09	1.53975e+09	8.58139e+07	1.80347e+08	6.34553e+07	1.50659e+08	5.85372e+06	1.77206e+06	18.6249	4.21916	0.00440659	1	1.22162	up
Com_29546_pos	N-(p-Coumaroyl) serotonin	C19 H18 N2 O3	644.256	10.403	645.263	Invalid mass	No results	No results	254374	78670.8	207916	111095	61315.4	307355	593218	929720	456242	1.00041e+06	219266	397902	0.283791	-1.8171	0.00453907	0.944444	1.39818	down
Com_5322_pos	AL 8810 Methyl ester	C25 H33 F O4	456.233	5.85	457.24	Invalid mass	No results	No results	1.32098e+07	1.24765e+07	8.45858e+06	5.83731e+06	1.76206e+07	6.8439e+06	3.00419e+07	2.17218e+07	2.86273e+07	2.94701e+07	1.61177e+07	1.43624e+07	0.459214	-1.12276	0.00457151	0.944444	1.10581	down
Com_5484_pos	Andrographolide	C20 H30 O5	350.206	8.422	351.214	Invalid mass	No results	No results	9.40528e+06	1.55367e+07	1.64859e+07	1.44773e+07	2.35479e+07	1.42084e+07	2.58814e+07	1.88018e+07	3.45635e+07	2.16938e+07	3.77427e+07	4.22848e+07	0.517558	-0.950206	0.00462353	0.944444	1.18107	down
Com_14433_pos	RLK	C18 H37 N7 O4	415.283	7.554	416.29	Invalid mass	No results	No results	4.66149e+06	5.03943e+06	4.93229e+06	4.11534e+06	1.20162e+06	2.79037e+06	720808	2.73298e+06	827652	1.51367e+06	947338	843283	2.9978	1.58391	0.00464809	0.944444	1.03876	up
Com_30134_pos	Ganoderiol A	C30 H46 O2	438.348	11.425	439.356	No results	No results	Full match	193458	219407	220694	147850	111715	174613	237661	812157	438253	737379	383451	275053	0.370234	-1.43349	0.00469419	1	1.34182	down
Com_396_pos	LDGTS 18:1	C28 H53 N O6	499.387	9.615	500.394	No results	Full match	No results	6.45009e+08	6.07228e+08	5.57014e+08	6.41848e+08	3.80087e+08	4.99917e+08	1.44397e+08	3.14245e+08	1.47737e+08	2.41776e+08	7.20465e+07	4.0193e+07	3.46848	1.7943	0.00482939	1	1.15836	up
Com_23749_pos	Guan-fu base A	C24 H31 N O6	429.213	5.335	430.221	No results	No results	Full match	293073	334979	446395	155023	160466	289329	327637	1.37086e+06	3.15009e+06	1.44493e+06	1.37632e+06	600074	0.203057	-2.30004	0.00485451	0.944444	1.15915	down
Com_343_pos	5α-Dihydrotestosterone	C19 H30 O2	290.224	10.017	291.232	Full match	No results	No results	1.42092e+08	3.79111e+08	5.55008e+08	7.86097e+08	4.58484e+08	6.81255e+08	7.9167e+07	1.50256e+08	6.41116e+07	1.17859e+08	2.98058e+08	1.81632e+08	3.36899	1.75232	0.00497474	0.916667	1.40236	up
Com_1249_pos	1,11-Undecanedicarboxylic acid	C13 H24 O4	244.167	6.284	245.174	No results	No results	Full match	7.38452e+07	1.05778e+08	1.61678e+08	1.2079e+08	1.72052e+08	1.52999e+08	5.18736e+07	6.44699e+07	8.01215e+07	6.1073e+07	9.05433e+07	8.17436e+07	1.83131	0.872876	0.00511335	0.916667	1.14652	up
Com_9049_pos	Docosanoic acid	C22 H44 O2	340.334	10.446	341.341	No results	No results	Full match	1.13575e+07	7.48785e+06	7.27109e+06	8.04416e+06	3.60941e+06	6.46046e+06	2.12255e+06	5.53451e+06	2.17419e+06	4.11365e+06	1.15292e+06	1.49108e+06	2.66627	1.41482	0.00514999	0.944444	1.19709	up
Com_720_pos	DGMG (18:2)	C33 H58 O14	678.382	8.908	679.389	No results	No results	Full match	3.18542e+08	2.27715e+08	1.76653e+08	2.41329e+08	1.36976e+08	2.13621e+08	2.24734e+07	6.02533e+07	2.28914e+07	4.56967e+07	7.18802e+06	1.38698e+06	8.22339	3.03973	0.00528323	1	1.19313	up
Com_195_pos	LDGTS 18:2	C28 H51 N O6	497.371	9.053	498.379	No results	Full match	No results	1.37e+09	7.92663e+08	6.06842e+08	9.93994e+08	6.01635e+08	9.00957e+08	1.42772e+08	3.00373e+08	1.34521e+08	2.02341e+08	3.94418e+07	1.1503e+07	6.33741	2.66389	0.0054596	1	1.02599	up
Com_3962_pos	Canthaxanthin	C40 H52 O2	564.397	10.242	565.404	No results	No results	Full match	3.56766e+07	2.95428e+07	2.16073e+07	2.19328e+07	1.06e+07	1.19287e+07	4.04079e+06	9.44874e+06	5.19295e+06	7.16474e+06	1.15346e+06	772317	4.72719	2.24098	0.00548863	1	1.33014	up
Com_7557_pos	LDGTS 22:4	C32 H55 N O6	549.403	9.697	550.41	No results	Full match	No results	1.49221e+07	1.42464e+07	1.39279e+07	1.45495e+07	8.25169e+06	1.0288e+07	1.37989e+06	6.81564e+06	1.79771e+06	5.76779e+06	538261	710476	4.47893	2.16315	0.00582259	1	1.1078	up
Com_20425_pos	Myristoleic Acid	C14 H26 O2	226.193	8.228	227.2	No results	No results	Full match	626414	455614	721383	733779	816019	701868	1.82287e+06	3.23152e+06	1.7598e+06	1.95421e+06	867849	916975	0.38425	-1.37988	0.00610008	1	1.58331	down
Com_412_pos	LPC(1-acyl 16:0)	C24 H50 N O7 P	495.334	9.654	496.341	No results	No results	Full match	4.62602e+08	4.24459e+08	4.30967e+08	6.14161e+08	2.74399e+08	5.99402e+08	9.63169e+07	3.86906e+08	8.87433e+07	2.52963e+08	7.52451e+07	6.35811e+07	2.91152	1.54177	0.00611263	0.972222	1.31059	up
Com_10_pos	LDGTS 18:4	C28 H47 N O6	493.34	8.109	494.347	No results	Full match	No results	1.06351e+10	6.35376e+09	2.74347e+09	7.07935e+09	5.00128e+09	6.26831e+09	5.74499e+08	7.70033e+08	3.49982e+08	6.15791e+08	3.19872e+07	5.41826e+06	16.2206	4.01976	0.00657465	1	1.05979	up
Com_5120_pos	Prostaglandin A2	C20 H30 O4	316.2	5.453	317.207	Invalid mass	No results	No results	7.69554e+06	1.31903e+07	2.52277e+07	1.23343e+07	1.23184e+07	1.20841e+07	3.41559e+07	2.02663e+07	3.72165e+07	2.27017e+07	2.13801e+07	2.07272e+07	0.529572	-0.917101	0.00668336	0.888889	1.23666	down
Com_1488_pos	Isophorone	C9 H14 O	138.104	5.936	139.112	Full match	No results	No results	7.03959e+07	8.94644e+07	1.19961e+08	1.18816e+08	1.44997e+08	1.01025e+08	1.1355e+08	1.54752e+08	1.83909e+08	1.90697e+08	1.79114e+08	1.81432e+08	0.64244	-0.638366	0.00672638	0.916667	1.04854	down
Com_958_pos	Ganoderic acid C2	C30 H46 O7	518.322	8.498	519.33	No results	No results	Full match	2.26823e+08	1.54245e+08	1.46779e+08	2.16868e+08	1.40965e+08	1.92869e+08	3.47089e+07	7.1708e+07	3.15036e+07	5.15292e+07	5.72036e+06	4.17701e+06	5.41041	2.43574	0.00679205	1	1.21859	up
Com_30329_pos	Vinblastine	C46 H58 N4 O9	810.419	10.957	811.425	No results	No results	Full match	608176	270332	592167	622252	132426	424778	177162	164745	134626	169015	95066.7	106705	3.12766	1.64509	0.00722455	0.888889	1.45055	up
Com_6286_pos	Adenine	C5 H5 N5	135.054	5.232	136.062	Full match	No results	Full match	9.74846e+06	1.00725e+07	1.17548e+07	1.65867e+07	2.54749e+07	1.27501e+07	4.55142e+06	5.80852e+06	6.06049e+06	5.85262e+06	1.30324e+07	7.68311e+06	2.00954	1.00687	0.007583	0.888889	1.02266	up
Com_3490_pos	Boc-beta-cyano-L-alanine	C9 H14 N2 O4	214.095	2.979	215.103	No results	No results	Full match	1.11481e+07	1.75133e+07	2.19433e+07	1.73289e+07	1.70647e+07	2.45875e+07	2.61346e+07	2.79847e+07	3.33958e+07	3.04852e+07	7.40524e+07	7.57477e+07	0.409207	-1.2891	0.00762359	1	1.3138	down
Com_17725_pos	Acetylharpagide	C17 H26 O11	406.149	5.318	407.156	No results	No results	Full match	652388	808428	1.4614e+06	1.14376e+06	1.70552e+06	1.43557e+06	1.83765e+06	2.03975e+06	2.32477e+06	1.90712e+06	4.99276e+06	6.32448e+06	0.370991	-1.43054	0.00785153	1	1.32605	down
Com_11310_pos	1-(3,4-dimethylphenyl)-3-piperidinopyrrolidine-2,5-dione	C17 H22 N2 O2	572.341	4.9	287.178	Invalid mass	No results	No results	8.00735e+06	4.34511e+06	2.07752e+06	1.09915e+06	535211	6.41389e+06	319840	290612	578261	518150	744834	327945	8.08674	3.01556	0.00788373	0.944444	1.35867	up
Com_527_pos	(+/-)-CP 47,497-C7-Hydroxy metabolite	C21 H34 O3	334.25	9.028	335.258	Full match	No results	No results	4.62443e+08	1.78329e+08	1.34607e+08	1.36978e+08	1.09506e+08	1.78043e+08	4.27642e+07	7.49839e+07	7.39593e+07	5.6197e+07	5.83379e+06	1.68116e+07	4.43506	2.14895	0.00788641	1	1.16269	up
Com_15070_pos	7-(2-thienyl)[1,2,4]triazolo[4,3-a]pyrimidine	C9 H6 N4 S	224.008	1.627	225.016	Invalid mass	No results	No results	3.53823e+06	3.84698e+06	4.00402e+06	3.97407e+06	3.57206e+06	4.17333e+06	8.97745e+06	4.03046e+06	7.59953e+06	4.77315e+06	8.36935e+06	8.32036e+06	0.549288	-0.864367	0.00924407	0.972222	1.21486	down
Com_11186_pos	Saxitoxin	C10 H17 N7 O4	281.124	5.684	282.132	Invalid mass	No results	No results	3.52378e+06	4.44091e+06	4.78109e+06	8.2953e+06	6.96108e+06	4.58339e+06	1.49276e+07	6.24541e+06	1.46944e+07	1.16864e+07	7.97918e+06	7.34031e+06	0.518274	-0.948214	0.00963461	0.888889	1.10134	down
Com_22170_pos	PC (16:2/16:3)	C40 H70 N O8 P	723.482	10.56	724.491	No results	Full match	No results	475949	2.02321e+06	1.07823e+06	579228	2.08772e+06	1.00462e+06	499830	629104	209231	467721	408552	243724	2.94893	1.56019	0.00964344	0.916667	1.12147	up
Com_8315_pos	Sclareol Glycol	C16 H30 O2	254.224	9.742	255.231	No results	No results	Full match	1.30242e+07	1.0056e+07	1.22414e+07	5.89581e+06	3.97173e+06	5.10107e+06	3.14538e+06	6.58264e+06	2.99063e+06	4.13932e+06	1.62109e+06	2.16124e+06	2.43651	1.28481	0.0106564	0.888889	1.11067	up
Com_10204_pos	Triptolide	C20 H24 O6	360.156	6.733	361.163	No results	No results	Full match	241732	3.7484e+06	2.14824e+06	2.47562e+06	1.07714e+06	1.73464e+06	5.55997e+06	5.00132e+06	1.51683e+07	7.72306e+06	3.75214e+06	5.51448e+06	0.267462	-1.9026	0.0110842	1	1.16205	down
Com_17717_pos	Berbamine	C37 H40 N2 O6	608.289	8.504	609.296	No results	No results	Full match	3.53269e+06	2.38819e+06	2.01686e+06	2.73841e+06	2.4662e+06	3.08707e+06	1.21624e+06	1.21307e+06	1.07172e+06	1.28731e+06	234002	193866	3.11134	1.63754	0.0121207	1	1.10491	up
Com_8997_pos	3-N-butyl-4,5-dihydrophthalide	C12 H16 O2	192.115	9.262	193.122	No results	No results	Full match	2.53132e+06	5.56081e+06	1.10996e+07	1.1731e+07	6.92212e+06	1.21427e+07	2.65056e+06	3.63479e+06	2.51195e+06	3.26995e+06	2.79737e+06	2.73566e+06	2.84015	1.50597	0.0128605	0.861111	1.38673	up
Com_23476_pos	Daurisoline	C37 H42 N2 O6	610.306	9.258	611.313	No results	No results	Full match	1.14561e+06	1.01401e+06	1.28759e+06	1.65777e+06	2.22296e+06	1.92912e+06	724277	1.0375e+06	527120	926341	161254	372095	2.46948	1.30421	0.0129133	0.972222	1.0421	up
Com_5075_pos	methyl 2-[(2-acetyl-3-oxo-1-butenyl)amino]acetate	C9 H13 N O4	199.085	5.54	200.092	Full match	No results	No results	1.11998e+07	1.48484e+07	1.52684e+07	1.72551e+07	2.1425e+07	2.23143e+07	2.20595e+07	1.92647e+07	2.39291e+07	2.8908e+07	3.0715e+07	4.66285e+07	0.596549	-0.745288	0.0131721	0.916667	1.03295	down
Com_18710_pos	5-Methoxy-N,N-dimethyltryptamine	C13 H18 N2 O	218.142	5.765	219.149	No results	No results	Full match	2.92593e+06	1.96958e+06	3.08859e+06	1.74849e+06	3.68275e+06	3.03582e+06	975385	1.64992e+06	1.6041e+06	2.24407e+06	654883	480463	2.16212	1.11244	0.0138473	0.944444	1.18601	up
Com_3541_pos	Ingenol-3-angelate	C25 H34 O6	430.233	6.829	431.241	Invalid mass	No results	No results	9.08381e+06	1.27558e+06	7.93056e+06	7.25718e+06	735353	6.29571e+06	2.39095e+07	1.10542e+07	1.93382e+07	1.71824e+07	2.27075e+07	2.28112e+07	0.278439	-1.84457	0.0139681	1	1.03777	down
Com_5465_pos	LDGTS 17:2	C27 H49 N O6	483.356	8.654	484.364	No results	Full match	No results	2.37265e+07	1.72548e+07	1.10651e+07	1.76603e+07	1.15581e+07	1.633e+07	4.14995e+06	1.03257e+07	3.7891e+06	5.9674e+06	966954	456508	3.80404	1.92753	0.0139735	1	1.05439	up
Com_16127_pos	DPK	C15 H26 N4 O6	340.175	4.782	341.182	Invalid mass	No results	No results	1.8562e+06	2.02773e+06	2.53974e+06	2.2877e+06	2.72682e+06	2.94227e+06	3.28146e+06	3.43958e+06	2.76742e+06	4.0098e+06	6.6798e+06	7.62191e+06	0.517283	-0.950975	0.0140799	0.972222	1.06822	down
Com_9318_pos	1-Phenyl-3-methyl-5-pyrazolone	C10 H10 N2 O	174.079	4.093	175.087	Full match	Full match	Full match	3.4741e+06	6.31617e+06	8.66242e+06	8.88189e+06	1.08507e+07	1.16173e+07	2.9539e+06	2.02078e+06	2.92786e+06	2.47754e+06	6.73518e+06	5.98247e+06	2.15617	1.10847	0.0143469	0.916667	1.24016	up
Com_31453_pos	N-Feruloylagmatine	C15 H21 N4 O3	305.16	4.146	328.15	No results	No results	Full match	147058	174094	227733	162712	247806	213821	222725	219391	325156	557877	333642	461778	0.553259	-0.853973	0.0144112	0.888889	1.0535	down
Com_209_pos	LPC 18:3	C26 H48 N O7 P	517.317	8.506	518.324	No results	Full match	Full match	1.15662e+09	8.30413e+08	8.11787e+08	1.27707e+09	9.04615e+08	1.20098e+09	1.94154e+08	4.29517e+08	1.91259e+08	3.53608e+08	2.44956e+07	1.0576e+07	5.1358	2.36059	0.0147513	1	1.03254	up
Com_27849_pos	gamma,gamma-Dimethylallyl pyrophosphate	C5 H12 O7 P2	246.006	1.232	247.013	No results	No results	Full match	495324	623302	593939	440629	425932	421686	694129	605472	751358	820893	1.54349e+06	1.80637e+06	0.482313	-1.05196	0.0150398	0.972222	1.23883	down
Com_6064_pos	H-Gly-Pro-OH	C7 H12 N2 O3	172.085	1.569	173.092	No results	No results	Full match	4.8925e+06	1.98348e+07	6.64413e+06	5.8341e+06	6.83774e+06	6.73738e+06	1.19169e+07	1.32979e+07	1.35727e+07	1.4289e+07	1.92572e+07	2.08583e+07	0.544904	-0.875926	0.0150758	0.861111	1.20257	down
Com_2556_pos	PC (16:0e/2:0)	C26 H54 N O7 P	523.364	10.566	524.371	No results	Full match	Full match	6.55752e+07	4.61495e+07	4.65429e+07	6.29479e+07	2.55018e+07	1.97966e+07	7.77404e+06	3.78362e+07	1.3621e+07	3.02719e+07	6.86882e+06	7.19346e+06	2.57339	1.36367	0.0159406	0.888889	1.14339	up
Com_1160_pos	Coenzyme Q2	C19 H26 O4	318.183	6.246	319.19	Full match	No results	No results	5.28789e+07	6.0098e+07	7.50538e+07	5.0209e+07	2.35406e+08	5.72424e+07	1.29491e+08	1.7968e+08	2.10241e+08	1.76382e+08	2.87468e+08	1.02052e+08	0.489156	-1.03163	0.0163357	0.861111	1.31026	down
Com_20136_pos	Neocnidilide	C12 H18 O2	194.131	9.989	195.138	No results	No results	Full match	1.13492e+06	1.40919e+06	1.5123e+06	2.74432e+06	1.25715e+06	1.8448e+06	1.00961e+06	1.07982e+06	867625	974499	1.20721e+06	941355	1.6287	0.70372	0.0164631	0.972222	1.16545	up
Com_2923_pos	PC (14:1e/3:0)	C25 H50 N O7 P	507.332	9.399	508.34	No results	Full match	No results	5.00473e+07	4.42262e+07	4.57217e+07	5.56092e+07	3.55754e+07	5.2897e+07	1.21947e+07	5.56382e+07	1.24414e+07	2.46495e+07	8.05267e+06	5.47163e+06	2.39832	1.26203	0.0170445	0.833333	1.04605	up
Com_11161_pos	D-beta-Homophenylalanine	C10 H13 N O2	179.095	5.973	180.102	No results	No results	Full match	3.59111e+06	5.72426e+06	8.03493e+06	6.79784e+06	9.90071e+06	6.72041e+06	3.40563e+06	4.20301e+06	3.74099e+06	6.64355e+06	2.86945e+06	2.68329e+06	1.73148	0.792004	0.0174855	0.888889	1.2083	up
Com_4759_pos	4-oxo-5-phenylpentanoic acid	C11 H12 O3	174.068	6.002	175.075	Invalid mass	No results	No match	1.0238e+07	1.6137e+07	2.14752e+07	1.53718e+07	2.30026e+07	2.25664e+07	2.49378e+07	2.36367e+07	2.42506e+07	2.35189e+07	4.49638e+07	5.07085e+07	0.566571	-0.81967	0.0178934	1	1.16445	down
Com_9950_pos	senkyunolide O	C24 H28 O4	380.199	7.714	381.206	No results	No results	Full match	1.89477e+06	1.52119e+06	2.17666e+06	293181	3.81493e+06	1.57895e+06	9.10408e+06	1.05923e+06	5.41298e+06	8.43318e+06	1.70308e+07	1.52957e+07	0.200222	-2.32033	0.0181534	0.861111	1.26783	down
Com_13000_pos	Methyl oleate	C19 H36 O2	296.271	11.808	297.279	No results	No results	Full match	3.40887e+06	4.16299e+06	5.97351e+06	6.45568e+06	3.56756e+06	5.85529e+06	923281	2.99529e+06	1.45933e+06	2.1514e+06	4.50023e+06	2.94142e+06	1.9654	0.974823	0.0200555	0.916667	1.0947	up
Com_26517_pos	Lapachol	C15 H14 O3	242.094	5.772	243.101	No results	No results	Full match	303788	280488	273262	659170	443628	414131	396921	1.3693e+06	2.20337e+06	782387	488778	1.77948e+06	0.338232	-1.56391	0.0203884	0.888889	1.07948	down
Com_8216_pos	Oleoyl ethanolamide	C20 H39 N O2	325.298	9.958	326.305	Full match	No results	No results	8.80011e+06	9.9945e+06	1.3015e+07	1.34397e+07	8.55519e+06	9.65438e+06	5.70153e+06	1.07464e+07	4.87325e+06	8.7312e+06	3.64823e+06	3.54056e+06	1.70399	0.76892	0.0208577	0.861111	1.15182	up
Com_11246_pos	Panthenol	C9 H19 N O4	205.131	5.121	206.139	Full match	Full match	Full match	2.71074e+06	3.52555e+06	4.83453e+06	4.00695e+06	6.32007e+06	2.48896e+06	4.6189e+06	5.11023e+06	5.35786e+06	7.30569e+06	9.059e+06	1.45046e+07	0.519773	-0.944047	0.0221261	0.888889	1.19066	down
Com_9892_pos	Dehydropachymic Acid	C33 H50 O5	526.366	9.459	527.374	No results	No results	Full match	9.92899e+06	6.8934e+06	4.78164e+06	7.66449e+06	3.38954e+06	5.27359e+06	2.59966e+06	5.99543e+06	2.56874e+06	4.43615e+06	1.48546e+06	1.18532e+06	2.07608	1.05386	0.0227082	0.888889	1.06022	up
Com_12362_pos	LPC(1-acyl 18:1)	C26 H52 N O7 P	521.347	10.813	522.355	No results	No results	Full match	6.88575e+06	3.92129e+06	4.4446e+06	5.93154e+06	2.63407e+06	3.76326e+06	1.45415e+06	4.86867e+06	1.31717e+06	3.41681e+06	803170	831610	2.17314	1.11978	0.0229161	0.861111	1.28131	up
Com_16671_pos	PC (22:4e/11:0)	C41 H76 N O7 P	725.549	11.852	726.556	No results	Invalid mass	No results	581147	262540	316388	357400	223053	183914	3.27581e+06	4.96841e+06	1.69405e+06	179684	827672	1.06475e+06	0.160232	-2.64177	0.0274896	0.833333	1.06887	down
Com_1093_pos	LPC(1-acyl 18:3)	C26 H48 N O7 P	517.314	9.677	518.322	No results	No results	Full match	9.31764e+07	9.28567e+07	1.05376e+08	1.89558e+08	1.1656e+08	2.07986e+08	4.24483e+07	1.55628e+08	4.19396e+07	9.82135e+07	3.08271e+07	2.57559e+07	2.04024	1.02874	0.0276198	0.833333	1.11266	up
Com_29736_pos	D-Galacturonic acid	C6 H10 O7	194.043	1.211	195.05	No results	No results	Full match	346618	319118	338925	292209	333168	424296	636685	305771	529345	505698	829542	1.28234e+06	0.502358	-0.993211	0.0287991	0.861111	1.18671	down
Com_4746_pos	PC (18:3e/2:0)	C28 H52 N O7 P	545.348	9.379	546.355	No results	Full match	No results	4.72093e+06	6.11418e+06	8.20223e+06	5.58772e+06	3.58063e+06	5.37068e+06	1.87013e+07	3.53612e+07	1.84683e+07	3.02395e+07	6.68175e+06	3.97421e+06	0.296019	-1.75624	0.0364824	0.833333	1.28091	down
Com_18961_pos	Lysops 22:6	C28 H44 N O9 P	569.275	7.799	570.282	No results	No results	Full match	1.96074e+06	1.61665e+06	734925	1.25305e+06	3.99452e+06	1.89079e+06	896218	719358	914355	915242	966005	987288	2.1211	1.08481	0.0398373	0.861111	1.27373	up
Com_27692_pos	D-Glucarate	C6 H10 O8	210.038	1.214	211.045	No results	No results	Full match	542786	641611	450077	693810	779273	675768	1.0476e+06	652577	804468	686016	1.55712e+06	1.84941e+06	0.573475	-0.802198	0.0402318	0.861111	1.09115	down
Com_27175_pos	VLK	C17 H34 N4 O4	358.258	4.908	359.265	Full match	No results	No results	483699	725910	593786	685639	942694	1.02409e+06	1.06047e+06	830694	1.24954e+06	678530	1.92619e+06	1.79019e+06	0.591302	-0.758032	0.0413335	0.833333	1.16669	down
Com_8968_pos	Linoleoyl ethanolamide	C20 H37 N O2	323.282	9.383	324.289	Full match	No results	No results	8.53228e+06	7.31772e+06	9.87472e+06	1.17899e+07	4.35183e+06	9.85127e+06	4.04451e+06	8.20334e+06	5.42917e+06	7.15719e+06	2.22657e+06	2.33773e+06	1.7592	0.814916	0.0424821	0.888889	1.02238	up
Com_6137_pos	N-Oleoyl Glycine	C20 H37 N O3	339.277	7.639	340.284	No results	No results	Full match	2.02419e+07	3.34126e+06	1.41305e+07	1.72228e+07	2.46877e+07	4.42208e+06	3.34514e+07	1.93702e+07	3.46241e+07	2.13094e+07	2.65769e+07	3.38204e+07	0.496867	-1.00907	0.0444576	0.916667	1.13357	down
Com_11593_pos	Lysopc 17:0	C25 H52 N O7 P	509.348	9.968	510.355	No results	No results	Full match	7.69576e+06	4.79363e+06	6.5946e+06	7.60573e+06	3.2999e+06	5.69932e+06	2.76713e+06	7.76343e+06	2.14135e+06	4.56764e+06	1.72001e+06	1.38577e+06	1.75416	0.81078	0.0459094	0.805556	1.03772	up
