# Supplementary material for: Combined Transcriptome and Metabolome Analysis of a New Species of Microalgae from the Tibetan Plateau and Its Response to Sewage Treatment
Source: MDPI journal article supplement (doi:10.3390/w14213391), 2022-10-26
Supplement: s1 [file s1 › Table S2.xlt]

## Sheet: YH_3.vs.YH_2_neg_Diff
Compound_ID	Name	Formula	Molecular Weight	RT [min]	m/z	mzCloud_Results	mzVault_Results	MassList_Results	neg_YH_3_1	neg_YH_3_2	neg_YH_3_3	neg_YH_3_4	neg_YH_3_5	neg_YH_3_6	neg_YH_2_1	neg_YH_2_2	neg_YH_2_3	neg_YH_2_4	neg_YH_2_5	neg_YH_2_6	FC	log2FC	Pvalue	ROC	VIP	Up.Down
Com_4924_neg	4,5-Dicaffeoylquinic acid	C25 H24 O12	516.137	4.744	515.13	Invalid mass	No results	No results	252503	243506	273247	249537	304223	189813	9.10842e+06	6.54057e+06	7.54174e+06	8.76406e+06	1.04e+07	9.13426e+06	0.0293816	-5.08894	3.90022e-12	1	1.58149	down
Com_6715_neg	Tricin O-malonylhexoside	C26 H26 O15	578.126	5.043	577.119	No results	No results	Full match	74172.9	96669.7	130440	116445	95841.4	104159	5.52347e+06	4.70931e+06	4.51316e+06	5.92231e+06	4.45972e+06	4.17726e+06	0.0210791	-5.56804	1.96212e-11	1	1.70032	down
Com_88_neg	5-oxoproline	C5 H7 N O3	129.042	2.29	128.035	No results	No results	Full match	1.03933e+09	1.13852e+09	1.04359e+09	1.11672e+09	1.15094e+09	1.28828e+09	2.73721e+08	3.12704e+08	2.60116e+08	2.77633e+08	2.43312e+08	3.11521e+08	4.03655	2.01312	2.58814e-10	1	1.14316	up
Com_4619_neg	2,5-Dimethylphenol	C8 H10 O	122.073	5.321	121.066	Full match	No results	Full match	746392	1.08077e+06	1.00695e+06	807069	907092	876268	3.44191e+06	2.78611e+06	3.52883e+06	3.62546e+06	3.78359e+06	3.69175e+06	0.260075	-1.943	7.01648e-09	1	1.06548	down
Com_654_neg	15(R)-Prostaglandin E2	C20 H32 O5	352.225	6.476	351.217	Full match	No results	No results	7.37027e+06	9.64509e+06	1.50309e+07	1.03313e+07	1.32206e+07	1.24164e+07	7.92143e+07	1.27498e+08	1.14148e+08	1.00489e+08	1.63053e+08	1.21583e+08	0.0963399	-3.37572	1.64141e-08	1	1.60749	down
Com_4954_neg	DGDG (16:4/18:4)	C49 H76 O15	950.524	11.283	949.517	No results	Invalid mass	No results	8.74509e+06	3.86384e+06	3.64894e+06	3.96654e+06	2.34745e+06	4.85214e+06	78379.9	192982	89961.9	78749.6	70010.2	73436.7	46.9975	5.55451	1.81123e-08	1	1.91302	up
Com_8500_neg	8-iso Prostaglandin A2	C20 H30 O4	316.203	7.516	315.196	Invalid mass	No results	No match	447639	342300	618478	443095	346257	339579	2.82411e+06	3.21205e+06	4.76346e+06	3.26178e+06	2.47798e+06	3.33835e+06	0.127648	-2.96976	2.45123e-08	1	1.7518	down
Com_14924_neg	(+)-epipinoresinol-4-O-beta-D-glucoside	C26 H32 O11	520.192	5.138	519.184	No results	No results	Full match	848524	704487	640173	1.084e+06	960221	873185	85390.1	116782	103589	86330.5	109297	171873	7.5908	2.92425	5.61406e-08	1	1.69333	up
Com_1524_neg	Prostaglandin J2	C20 H30 O4	316.203	7.747	315.196	Invalid mass	No results	No match	1.55491e+06	1.49606e+06	1.87364e+06	3.86739e+06	2.28565e+06	1.83145e+06	4.19584e+07	4.47347e+07	3.84872e+07	3.31072e+07	1.96811e+07	2.55513e+07	0.0634292	-3.97871	5.75384e-08	1	1.82331	down
Com_803_neg	(+/-)11-HETE	C20 H32 O3	320.235	8.274	319.228	Full match	No results	Full match	7.55875e+06	9.48406e+06	1.32398e+07	1.33778e+07	1.13678e+07	1.42685e+07	9.10571e+07	1.08648e+08	1.03634e+08	7.09797e+07	8.94349e+07	9.79965e+07	0.123359	-3.01907	6.17297e-08	1	1.04211	down
Com_938_neg	Kolavic acid	C20 H30 O4	334.214	7.031	333.207	No results	No results	Full match	4.40579e+06	6.72216e+06	9.33109e+06	8.20122e+06	8.98461e+06	8.18832e+06	4.59563e+07	8.625e+07	7.27994e+07	6.74854e+07	6.4668e+07	6.11678e+07	0.115064	-3.11949	7.09382e-08	1	1.60241	down
Com_7738_neg	2-Ethylbutyric Acid	C6 H12 O2	116.083	5.498	115.076	No results	No results	Full match	618683	928275	1.07139e+06	943854	1.00076e+06	956835	3.49456e+06	3.50482e+06	4.83956e+06	3.84883e+06	4.71127e+06	5.70139e+06	0.211483	-2.24138	8.70227e-08	1	1.7574	down
Com_459_neg	Pimelic acid	C7 H12 O4	160.073	5.497	159.066	Full match	Full match	Full match	3.16153e+07	4.15697e+07	4.80447e+07	4.16326e+07	4.64012e+07	4.65643e+07	1.57273e+08	1.66114e+08	2.0357e+08	1.87052e+08	2.34862e+08	2.70233e+08	0.209849	-2.25258	9.65195e-08	1	1.75134	down
Com_1344_neg	Ptaquiloside	C20 H30 O8	398.194	6.022	397.187	No results	No results	Full match	1.0235e+07	1.4252e+07	1.55487e+07	9.43949e+06	1.10239e+07	1.18994e+07	4.85679e+07	5.22929e+07	3.85303e+07	4.34383e+07	6.0205e+07	6.48641e+07	0.235138	-2.08842	1.49321e-07	1	1.90651	down
Com_2426_neg	Carnosic acid	C20 H28 O4	332.199	6.835	331.191	No results	No results	Full match	2.70032e+06	2.98315e+06	3.40062e+06	3.77674e+06	3.78957e+06	3.19244e+06	2.15719e+07	2.41752e+07	2.48306e+07	2.23712e+07	1.32755e+07	1.81496e+07	0.159542	-2.64799	2.05241e-07	1	1.68359	down
Com_9129_neg	Taurine	C2 H7 N O3 S	125.014	4.747	124.007	Full match	No results	No results	129729	233589	231078	258328	386666	274581	2.53655e+06	3.23389e+06	1.75749e+06	2.11627e+06	3.03528e+06	4.21512e+06	0.0896128	-3.48015	2.29536e-07	1	1.38753	down
Com_2479_neg	(-)-3-(3,4-Dihydroxyphenyl)-2-methylalanine	C10 H13 N O4	211.084	5.627	210.077	No results	No results	Full match	9.86893e+06	1.20355e+07	1.10687e+07	1.26157e+07	1.23658e+07	1.23717e+07	2.4866e+07	2.3251e+07	2.32604e+07	2.06269e+07	2.1885e+07	1.95801e+07	0.526909	-0.924374	2.68966e-07	1	1.30919	down
Com_454_neg	Ginsenoside F1	C36 H62 O9	638.439	6.843	637.43	No results	No results	Full match	3.03087e+07	4.87647e+07	5.63163e+07	4.05203e+07	4.04935e+07	3.63151e+07	1.75177e+08	1.64011e+08	2.2634e+08	2.27017e+08	1.49499e+08	1.40487e+08	0.233452	-2.0988	3.18076e-07	1	1.06692	down
Com_6413_neg	Oridonin	C20 H28 O6	364.188	7.087	363.181	No results	No results	Full match	1.18719e+06	1.40303e+06	1.11082e+06	1.87324e+06	1.21839e+06	1.59262e+06	6.53265e+06	6.16618e+06	7.45673e+06	6.38953e+06	4.14339e+06	4.82282e+06	0.23613	-2.08235	3.27733e-07	1	1.41651	down
Com_4455_neg	4-tert-Amylphenol	C11 H16 O	164.12	6.645	163.112	Full match	No results	No results	7.0624e+06	9.41991e+06	8.21676e+06	9.4741e+06	1.05284e+07	1.0719e+07	2.88906e+06	3.95689e+06	3.25929e+06	2.8853e+06	3.39408e+06	3.54859e+06	2.78031	1.47525	3.69291e-07	1	1.59298	up
Com_3873_neg	DL-4-Hydroxyphenyllactic acid	C9 H10 O4	182.055	5.497	181.048	Invalid mass	No results	No results	2.01028e+06	1.67983e+06	1.83281e+06	1.09523e+06	2.04671e+06	1.70521e+06	1.43909e+07	7.19307e+06	1.58018e+07	9.38563e+06	9.96004e+06	1.22141e+07	0.15041	-2.73303	3.76013e-07	1	1.68531	down
Com_5333_neg	Methyl gallate	C8 H8 O5	184.037	4.936	183.03	No results	No results	Full match	3.87572e+06	6.8527e+06	7.86418e+06	7.18225e+06	5.80236e+06	7.04135e+06	515807	1.34635e+06	549061	702929	746067	628177	8.60411	3.10503	4.46895e-07	1	1.57549	up
Com_733_neg	6-Gingerol	C17 H26 O4	294.183	6.471	293.176	No results	No results	Full match	1.98686e+07	2.64909e+07	3.50888e+07	1.93789e+07	2.26762e+07	2.81465e+07	9.75571e+07	1.17737e+08	1.20787e+08	1.23984e+08	1.40035e+08	1.18039e+08	0.21117	-2.24352	7.47496e-07	1	1.81064	down
Com_9238_neg	Coixol	C8 H7 N O3	165.042	5.754	164.035	No results	No results	Full match	1.21499e+06	1.26148e+06	1.38196e+06	1.29401e+06	1.62453e+06	1.34064e+06	3.72051e+06	2.8882e+06	2.72703e+06	2.861e+06	3.69957e+06	3.58166e+06	0.416759	-1.26272	7.56565e-07	1	1.33615	down
Com_674_neg	6β-Prostaglandin I1	C20 H34 O5	336.23	7.249	335.223	Invalid mass	No results	No results	1.17842e+07	1.7474e+07	2.00882e+07	1.63356e+07	1.80866e+07	1.79099e+07	7.73232e+07	1.02365e+08	8.89406e+07	1.01032e+08	1.56704e+08	1.60517e+08	0.148029	-2.75605	7.73255e-07	1	1.54071	down
Com_1427_neg	Esculin	C15 H16 O9	294.075	1.436	293.068	Invalid mass	No results	No results	4.67219e+07	3.64701e+07	3.64668e+07	1.91878e+07	3.80485e+07	4.04531e+07	2.85461e+06	1.44691e+06	4.91701e+06	1.88754e+06	2.12955e+06	3.3213e+06	13.1273	3.7145	7.86239e-07	1	1.34942	up
Com_24_neg	Azelaic acid	C9 H16 O4	188.105	5.869	187.097	Full match	No results	Full match	6.88081e+08	9.40337e+08	9.3788e+08	8.50473e+08	9.30107e+08	8.07667e+08	3.06291e+09	3.06017e+09	3.4369e+09	3.55484e+09	4.83127e+09	5.11777e+09	0.22349	-2.16172	8.39807e-07	1	1.77791	down
Com_161_neg	(±)8-HEPE	C20 H30 O3	318.219	7.804	317.212	Full match	No results	No results	3.05388e+07	4.64492e+07	6.49627e+07	6.51206e+07	7.01315e+07	5.22823e+07	5.44437e+08	7.37988e+08	7.27415e+08	5.90867e+08	6.44743e+08	6.54746e+08	0.0844791	-3.56526	8.67375e-07	1	1.21383	down
Com_2648_neg	N2-Methylguanosine	C11 H15 N5 O5	297.107	4.889	296.1	Full match	Full match	Full match	5.00011e+06	6.85728e+06	7.80432e+06	6.90422e+06	7.36335e+06	7.47817e+06	1.84973e+07	2.1292e+07	1.94612e+07	1.84963e+07	2.15948e+07	2.22771e+07	0.34047	-1.5544	8.94412e-07	1	1.26874	down
Com_4083_neg	Thromboxane B2	C20 H34 O6	370.235	6.206	369.228	Full match	No results	No results	1.79117e+06	2.70021e+06	3.26853e+06	2.31478e+06	2.66865e+06	2.26035e+06	1.12494e+07	1.02038e+07	1.04629e+07	1.21939e+07	8.49647e+06	6.37346e+06	0.254387	-1.97491	9.69348e-07	1	1.70177	down
Com_8407_neg	Nicotinuric acid	C8 H8 N2 O3	180.053	4.834	179.046	Full match	No results	Full match	1.46985e+06	3.02211e+06	2.23279e+06	2.96879e+06	2.99079e+06	4.03517e+06	153876	162636	152143	157750	406571	333548	12.2351	3.61295	1.06848e-06	1	1.4547	up
Com_7899_neg	3-methyl-5-oxo-5-(4-toluidino)pentanoic acid	C13 H17 N O3	235.121	5.41	234.113	Full match	No results	No results	1.08589e+06	1.32387e+06	1.32807e+06	964306	1.02929e+06	1.0426e+06	3.59711e+06	3.49776e+06	4.83523e+06	4.54911e+06	2.94438e+06	3.04463e+06	0.301494	-1.7298	1.1193e-06	1	1.73529	down
Com_10240_neg	15(S)-HpEPE	C20 H30 O4	334.212	8.281	333.205	Invalid mass	No results	No results	155177	178913	170715	262353	227888	124331	1.1006e+06	2.31935e+06	2.9536e+06	1.5571e+06	2.637e+06	3.38235e+06	0.0802421	-3.6395	1.28683e-06	1	1.90761	down
Com_9428_neg	Vitamin B1	C12 H17 Cl N4 O S	300.082	5.342	299.075	No results	No results	Full match	736066	693700	388317	750077	646298	479650	3.45124e+06	2.22432e+06	3.10915e+06	2.67603e+06	2.13222e+06	2.72416e+06	0.226394	-2.14309	1.41166e-06	1	1.57495	down
Com_3329_neg	Glu-Gln	C10 H17 N3 O6	275.112	1.545	274.104	No results	Full match	No results	4.82513e+06	5.42552e+06	6.56576e+06	5.2324e+06	4.291e+06	6.36883e+06	1.54042e+07	1.09521e+07	1.54399e+07	1.629e+07	1.77415e+07	1.90313e+07	0.344813	-1.53611	1.43002e-06	1	1.31246	down
Com_2590_neg	LPE 9:0	C14 H30 N O7 P	355.176	6.568	354.168	No results	Full match	No results	2.13257e+07	1.2957e+07	8.02455e+06	6.83011e+06	2.1754e+07	1.1364e+07	1.19161e+06	651687	773306	455674	1.02058e+06	1.40427e+06	14.9633	3.90336	1.44674e-06	1	1.54609	up
Com_4822_neg	alpha-Hederin	C41 H66 O12	750.455	7.723	749.448	No results	No results	Full match	6.97307e+06	9.02181e+06	3.7984e+06	7.41951e+06	4.14951e+06	6.76262e+06	475187	492170	503161	688881	489302	497229	12.1188	3.59918	1.47558e-06	1	1.68733	up
Com_4451_neg	Myrislignan	C21 H26 O6	374.173	6.652	373.166	No results	No results	Full match	141298	179444	201423	198656	251516	201941	3.8093e+06	3.52605e+06	4.44555e+06	1.07582e+07	6.77649e+06	3.25888e+06	0.036049	-4.7939	1.64066e-06	1	1.87523	down
Com_8245_neg	3-Phenoxybenzoic acid	C13 H10 O3	214.065	5.289	213.057	Invalid mass	No results	No results	202613	161234	196812	151272	118267	140447	2.12886e+06	1.90208e+06	2.73154e+06	1.46064e+06	4.65057e+06	3.68644e+06	0.0586133	-4.09263	1.66181e-06	1	1.8238	down
Com_1298_neg	Salidroside	C14 H20 O7	300.121	5.635	299.114	No results	No results	Full match	3.181e+06	7.14826e+06	7.50953e+06	6.15104e+06	7.28396e+06	6.76256e+06	3.11559e+07	5.47826e+07	4.76445e+07	4.56267e+07	2.92532e+07	2.57266e+07	0.162417	-2.62223	1.80611e-06	1	1.68522	down
Com_2437_neg	Abscisic Acid	C15 H20 O4	264.136	6.665	263.129	No results	No results	Full match	629797	1.0281e+06	2.11071e+06	2.11096e+06	1.3902e+06	1.77e+06	1.30767e+07	2.24051e+07	1.87703e+07	1.71408e+07	2.32942e+07	2.99049e+07	0.072555	-3.78478	1.95151e-06	1	1.81973	down
Com_2965_neg	MGDG (16:4/16:4)	C41 H62 O10	760.44	11.147	759.433	No results	Invalid mass	No results	1.77699e+07	8.14715e+06	7.78346e+06	8.00083e+06	4.15234e+06	8.91696e+06	741721	799560	764624	1.18685e+06	341796	485486	12.6783	3.66429	2.0895e-06	1	1.79579	up
Com_9629_neg	Casticin	C19 H18 O8	374.099	2.238	373.092	No results	No results	Full match	186479	272137	345663	215816	142382	263635	1.14659e+06	3.04771e+06	1.58841e+06	1.56817e+06	1.09585e+06	1.62707e+06	0.141566	-2.82045	2.2203e-06	1	1.41628	down
Com_228_neg	9-Hydroxy-(10E,12Z,15Z)-Octadecatrienoic Acid	C18 H30 O3	294.219	8.093	293.212	No results	No results	Full match	1.05962e+08	1.37683e+08	1.43243e+08	1.59152e+08	1.35625e+08	1.13707e+08	3.34438e+08	3.37105e+08	3.57666e+08	3.29424e+08	2.89784e+08	3.03868e+08	0.407406	-1.29546	2.24258e-06	1	1.24862	down
Com_568_neg	2-Ethylhexanoic acid	C8 H16 O2	144.115	5.87	143.107	Full match	No results	No results	2.75831e+07	2.91057e+07	3.81699e+07	3.12542e+07	3.60387e+07	3.38105e+07	1.18644e+08	1.17655e+08	1.38991e+08	1.32335e+08	1.9035e+08	2.14083e+08	0.214857	-2.21855	2.24398e-06	1	1.7746	down
Com_13859_neg	N4-Acetylcytidine	C11 H15 N3 O6	285.096	4.954	284.089	Full match	No results	No results	129711	292819	259769	249256	260781	283460	1.02898e+06	1.04355e+06	1.08754e+06	1.06894e+06	1.50555e+06	1.60776e+06	0.200998	-2.31475	2.31109e-06	1	1.65024	down
Com_8565_neg	Hordatine B	C29 H40 N8 O5	580.31	11.898	289.148	No results	No results	Full match	1.342e+06	2.54128e+06	3.67831e+06	2.06162e+06	1.21272e+06	1.94817e+06	280357	57925.3	80214.1	58630.8	67350	74923.1	20.6395	4.36734	2.41798e-06	1	1.75404	up
Com_6289_neg	2-[2-(4-benzhydrylpiperazino)-2-oxoethoxy]acetic acid	C21 H24 N2 O4	368.17	5.147	367.162	Invalid mass	No results	No results	5.15283e+06	5.40969e+06	5.83234e+06	6.55815e+06	6.67121e+06	6.08864e+06	1.14994e+06	927998	1.0091e+06	1.54127e+06	1.73913e+06	1.40229e+06	4.59641	2.20051	3.20939e-06	1	1.77534	up
Com_5540_neg	Pyrroloquinoline quinone	C14 H6 N2 O8	330.012	1.362	329.005	No results	No results	Full match	3.22071e+06	3.85531e+06	4.94208e+06	7.84272e+06	3.65573e+06	4.84724e+06	617324	774561	569286	794744	711624	826328	6.60565	2.7237	3.29439e-06	1	1.80302	up
Com_9311_neg	N-benzyl-N'-methyl-N-(pyridin-3-ylmethyl)thiourea	C15 H17 N3 S	271.117	4.169	270.109	Invalid mass	No results	No results	2.24769e+06	2.99485e+06	3.15728e+06	3.29259e+06	1.97755e+06	3.28064e+06	767299	955949	661082	820233	1.01076e+06	1.21433e+06	3.12185	1.6424	3.88164e-06	1	1.31684	up
Com_1448_neg	1,4-Cyclohexanedicarboxylic acid	C8 H12 O4	172.073	5.793	171.066	No results	Full match	No results	8.36965e+06	7.5995e+06	9.2167e+06	9.84211e+06	8.44826e+06	1.32997e+07	2.78935e+07	2.11739e+07	2.289e+07	2.18252e+07	2.87592e+07	2.61785e+07	0.381763	-1.38925	4.16162e-06	1	1.23532	down
Com_15962_neg	Cyclic AMP	C10 H12 N5 O6 P	329.053	3.734	328.045	No results	No results	Full match	30667.4	55711.2	104256	77267.1	58297.4	37673.2	914917	693204	800672	845997	864504	550265	0.0779243	-3.68178	4.89097e-06	1	1.8979	down
Com_398_neg	DGDG (18:3/16:4)	C49 H78 O15	952.539	11.716	951.533	No results	Invalid mass	No results	2.50648e+08	1.63486e+08	1.54447e+08	1.82162e+08	1.4567e+08	1.73689e+08	1.17167e+07	1.72605e+07	1.2378e+07	1.35553e+07	4.68842e+06	6.54984e+06	16.1772	4.01589	6.17885e-06	1	1.88658	up
Com_659_neg	2-Oxoglutaric acid	C5 H6 O5	146.021	1.708	145.014	Full match	No results	Full match	9.38052e+06	1.671e+07	2.83371e+07	1.93556e+07	2.79444e+07	1.7543e+07	9.07675e+07	1.23347e+08	1.35507e+08	1.40866e+08	8.6156e+07	1.76718e+08	0.158318	-2.6591	7.40463e-06	1	1.81602	down
Com_13535_neg	Dehydrocorydalin	C22 H24 N O4	366.172	5.339	365.165	No results	No results	Full match	105017	80272.2	74866.4	81680.9	95277.6	91045.4	642152	600537	1.03642e+06	1.10408e+06	871658	1.76735e+06	0.0877022	-3.51124	8.46646e-06	1	1.73264	down
Com_10547_neg	Piperine	C17 H19 N O3	285.136	6.481	284.129	No results	No results	Full match	239857	547758	548363	342751	408911	403385	1.61027e+06	2.55263e+06	1.89228e+06	2.06214e+06	1.03416e+06	1.67737e+06	0.230036	-2.12007	8.63684e-06	1	1.70732	down
Com_1673_neg	Levulinic acid	C5 H8 O3	116.047	5.349	115.04	No results	No results	Full match	9.88433e+06	1.36614e+07	1.44734e+07	1.2256e+07	1.29621e+07	1.20157e+07	2.66919e+07	2.85941e+07	3.0748e+07	3.45914e+07	4.44489e+07	4.40809e+07	0.359795	-1.47475	8.74213e-06	1	1.63283	down
Com_1626_neg	D-3-Phosphoglyceric acid	C3 H7 O7 P	185.993	1.637	184.985	No results	No results	Full match	3.269e+07	3.9112e+07	3.10518e+07	3.00048e+07	2.45134e+07	4.13068e+07	6.66946e+06	6.88748e+06	8.07931e+06	7.79276e+06	1.15792e+07	1.36053e+07	3.63791	1.86311	9.30444e-06	1	1.07043	up
Com_975_neg	Ascorbic acid	C6 H8 O6	176.032	2.717	175.024	Full match	No results	Full match	2.85466e+06	5.20058e+06	8.20361e+06	5.1837e+06	2.45083e+06	8.02038e+06	2.69471e+07	5.4808e+07	3.80418e+07	4.54352e+07	9.16287e+07	1.0309e+08	0.0886616	-3.49555	9.8257e-06	1	1.639	down
Com_9748_neg	H-Trp-NH2.HCl	C11 H14 Cl N3 O	239.083	4.133	238.075	No results	No results	Full match	271944	366402	575076	476085	398102	659997	1.26404e+06	2.764e+06	1.87125e+06	2.63504e+06	2.98685e+06	3.72306e+06	0.180239	-2.47202	1.04921e-05	1	1.68161	down
Com_276_neg	13,14-dihydro-19(R)-hydroxy Prostaglandin E1	C20 H36 O6	354.24	7.321	353.233	Invalid mass	No results	No results	1.22556e+08	1.33654e+08	1.73756e+08	1.63005e+08	1.7904e+08	1.53747e+08	3.02444e+08	3.29928e+08	2.96415e+08	3.17679e+08	4.75874e+08	4.12212e+08	0.433701	-1.20523	1.14792e-05	1	1.48369	down
Com_2058_neg	3,4,5-trihydroxycyclohex-1-ene-1-carboxylic acid	C7 H10 O5	174.052	4.916	173.045	Full match	Full match	Full match	5.13137e+06	7.86061e+06	8.90667e+06	4.86622e+06	4.73685e+06	7.36275e+06	2.64087e+07	2.98298e+07	3.17396e+07	2.91269e+07	2.4414e+07	2.62705e+07	0.231626	-2.11013	1.25954e-05	1	1.76861	down
Com_1865_neg	Kirenol	C20 H34 O4	338.245	7.492	337.238	No results	No results	Full match	3.36332e+06	5.02499e+06	8.99321e+06	6.9589e+06	7.87831e+06	5.20886e+06	1.72138e+07	3.36567e+07	1.90791e+07	3.02441e+07	3.74564e+07	3.27061e+07	0.219702	-2.18638	1.7174e-05	1	1.413	down
Com_9105_neg	4-O-p-Coumaroylquinic acid	C16 H18 O8	338.101	5.615	337.093	No results	No results	Full match	943212	1.87151e+06	2.28638e+06	1.94566e+06	2.88958e+06	2.05722e+06	319792	639643	317501	519410	339258	383744	4.76058	2.25114	1.77601e-05	1	1.40596	up
Com_965_neg	Toddalolactone	C16 H20 O6	308.126	5.724	307.118	No results	No results	Full match	1.04449e+07	1.17147e+07	1.59083e+07	1.19576e+07	1.52282e+07	1.55009e+07	4.24907e+07	2.39457e+07	5.02617e+07	4.25449e+07	4.42806e+07	3.4908e+07	0.338691	-1.56196	1.98167e-05	1	1.15473	down
Com_4601_neg	N-Acetylaspartic acid	C6 H9 N O5	175.048	2.047	174.04	Full match	No results	Full match	3.36671e+06	4.73858e+06	5.32935e+06	4.65829e+06	3.33861e+06	4.84971e+06	7.31812e+06	1.00172e+07	9.94868e+06	9.53911e+06	9.83022e+06	1.21899e+07	0.446631	-1.16284	2.08179e-05	1	1.0766	down
Com_116_neg	(+/-)9(10)-EpOME	C18 H32 O3	342.24	6.672	341.233	Invalid mass	No results	No results	5.70438e+08	6.49728e+08	8.56822e+08	9.72346e+08	7.81194e+08	8.6005e+08	2.37572e+08	4.53053e+08	2.93172e+08	2.88406e+08	2.53191e+08	2.32488e+08	2.66831	1.41593	2.16984e-05	1	1.73051	up
Com_2511_neg	Jasmonic acid	C12 H18 O3	210.125	6.608	209.118	Full match	No results	Full match	2.7301e+06	3.65979e+06	3.38896e+06	3.93058e+06	4.53126e+06	3.74007e+06	7.89361e+06	9.95238e+06	1.5843e+07	1.01036e+07	1.56445e+07	1.42482e+07	0.298306	-1.74513	2.26396e-05	1	1.11216	down
Com_240_neg	LPE 18:2	C23 H44 N O7 P	477.285	9.174	476.278	No results	Full match	Full match	4.77662e+08	3.09162e+08	2.79176e+08	3.17467e+08	2.48191e+08	2.52603e+08	5.74022e+06	1.20551e+07	4.18312e+06	9.08038e+06	1.94038e+06	1.54884e+06	54.5404	5.76925	2.32269e-05	1	1.46229	up
Com_3531_neg	β-Muricholic acid	C24 H40 O5	454.293	8.589	453.286	Invalid mass	No results	No results	1.40407e+07	5.95802e+06	3.03063e+06	4.94846e+06	5.78616e+06	5.85323e+06	1.12108e+06	1.14815e+06	806366	928511	440319	374251	8.22162	3.03942	2.36256e-05	1	1.6652	up
Com_14922_neg	3'-Methoxy Puerarin	C22 H22 O10	446.12	5.493	445.113	No results	No results	Full match	629295	924758	1.02636e+06	940018	1.1687e+06	1.04621e+06	268515	162233	256819	297024	382414	362038	3.31706	1.72991	2.43048e-05	1	1.73117	up
Com_2121_neg	Hexadecanedioic acid	C16 H30 O4	286.214	7.866	285.207	Full match	No results	Full match	1.54227e+06	2.41489e+06	2.79929e+06	7.32348e+06	3.09687e+06	2.38696e+06	1.67344e+07	2.50233e+07	2.40391e+07	2.88696e+07	2.9166e+07	3.59774e+07	0.122419	-3.0301	2.47806e-05	1	1.84693	down
Com_2483_neg	Tussilagone	C23 H34 O5	390.24	8.017	389.233	No results	No results	Full match	2.04868e+07	1.60883e+07	2.04731e+07	2.10204e+07	1.90569e+07	2.38574e+07	1.81651e+06	5.18081e+06	3.07184e+06	2.76223e+06	1.70318e+06	2.94201e+06	6.92257	2.79131	2.5122e-05	1	1.40004	up
Com_3795_neg	Adrenic acid	C22 H36 O2	332.271	10.841	331.264	Full match	No results	No results	1.26828e+07	9.22322e+06	1.10507e+07	1.27229e+07	4.05306e+06	9.10016e+06	666224	2.33536e+06	713477	1.43532e+06	532183	552435	9.43591	3.23816	2.54726e-05	1	1.10073	up
Com_447_neg	3-methyl-4-[2-(2-methylphenyl)hydrazono]-4,5-dihydro-1H-pyrazol-5-one	C11 H12 N4 O	216.1	5.662	215.092	Invalid mass	No results	No results	2.89491e+07	3.242e+07	4.27872e+07	3.83719e+07	4.50187e+07	3.79044e+07	1.08224e+08	1.23219e+08	1.39677e+08	1.27216e+08	2.43712e+08	2.19525e+08	0.234461	-2.09258	2.54931e-05	1	1.33237	down
Com_105_neg	2,3-Dinor-8-epi-prostaglandin F2α	C18 H30 O5	326.209	6.724	325.202	Full match	No results	No results	1.9216e+08	4.00001e+08	3.11249e+08	2.91933e+08	3.4091e+08	2.27997e+08	7.85136e+08	1.02605e+09	9.27136e+08	1.04486e+09	7.57069e+08	5.67898e+08	0.34538	-1.53374	2.58049e-05	1	1.65192	down
Com_1283_neg	15(R),19(R)-Hydroxy prostaglandin F1α	C20 H36 O6	354.24	7.001	353.233	Invalid mass	No results	No results	2.41787e+07	1.98766e+07	2.45341e+07	2.05272e+07	2.43061e+07	2.14665e+07	4.22759e+07	5.55082e+07	4.22159e+07	5.09531e+07	6.10464e+07	6.9594e+07	0.41944	-1.25346	2.75865e-05	1	1.82879	down
Com_5876_neg	N-Acetyl-Asp-Glu	C11 H16 N2 O8	304.091	2.617	303.083	No results	No results	Full match	3.715e+06	5.574e+06	6.26938e+06	5.9311e+06	2.38814e+06	7.20395e+06	646604	864827	672351	887748	1.42679e+06	1.49461e+06	5.18637	2.37473	2.83076e-05	1	1.18605	up
Com_9787_neg	Ethyl gallate	C9 H10 O5	198.05	5.183	197.043	No results	Invalid mass	No results	729603	300731	365899	264691	270196	342366	2.03906e+06	2.52295e+06	2.82056e+06	1.8595e+06	991247	1.2752e+06	0.197548	-2.33972	2.86639e-05	1	1.31203	down
Com_1232_neg	Sequoyitol	C7 H14 O6	194.079	1.71	193.071	No results	No results	Full match	3.77395e+07	4.14972e+07	5.71052e+07	4.99883e+07	4.27568e+07	3.9776e+07	2.89415e+07	2.35671e+07	2.37931e+07	2.52509e+07	2.03314e+07	2.46139e+07	1.83527	0.875991	2.93883e-05	1	1.55508	up
Com_9955_neg	N'1-(3,4,5-trimethoxybenzylidene)-3-(4-hydroxyphenyl)propanohydrazide	C19 H22 N2 O5	358.154	7.923	357.147	Full match	No results	No results	829732	1.51479e+06	1.88604e+06	2.93949e+06	2.72059e+06	2.11339e+06	135528	134645	136178	129443	127232	127570	15.1835	3.92444	3.13068e-05	1	1.7696	up
Com_10512_neg	Phenylglyoxylic acid	C8 H6 O3	150.031	6.222	149.024	No results	No results	Full match	1.55383e+06	2.4706e+06	2.1641e+06	2.06175e+06	2.43057e+06	2.21224e+06	419808	1.05219e+06	604783	573538	680639	493277	3.37142	1.75336	3.58099e-05	1	1.65998	up
Com_7095_neg	Cucurbitacin B	C32 H46 O8	558.318	6.499	557.311	No results	No results	Full match	1.88818e+06	1.94773e+06	2.07521e+06	1.34645e+06	1.76344e+06	1.78282e+06	2.91432e+06	5.25538e+06	5.70975e+06	4.62735e+06	5.644e+06	4.51684e+06	0.376865	-1.40788	3.62866e-05	1	1.70245	down
Com_214_neg	all-cis-4,7,10,13,16-Docosapentaenoic acid	C22 H34 O2	330.256	10.523	329.248	Full match	No results	No results	5.56083e+08	4.97632e+08	4.41661e+08	5.51934e+08	2.15702e+08	4.17735e+08	3.07116e+07	9.90224e+07	3.41752e+07	6.36439e+07	2.20974e+07	1.95873e+07	9.9568	3.31568	3.8044e-05	1	1.11571	up
Com_121_neg	Sucrose	C12 H22 O11	342.116	1.513	341.108	Full match	Full match	Full match	1.35199e+08	1.69403e+08	2.3302e+08	2.06396e+08	2.48036e+08	1.65835e+08	9.6951e+08	9.37168e+08	8.99859e+08	8.28673e+08	5.15761e+08	4.1593e+08	0.25354	-1.97972	3.82785e-05	1	1.49804	down
Com_1466_neg	methyl oxo pentanoate	C6 H10 O3	130.063	5.192	129.056	No results	No results	Full match	7.01305e+06	8.53902e+06	1.06076e+07	9.08257e+06	8.96963e+06	9.41526e+06	1.6781e+07	3.13617e+07	3.37161e+07	2.98519e+07	2.09746e+07	2.83781e+07	0.332957	-1.58659	3.8614e-05	1	1.09343	down
Com_4669_neg	Sattabacin	C13 H18 O2	206.13	6.908	205.123	No results	No results	Full match	2.34428e+06	4.19143e+06	3.28498e+06	4.01515e+06	4.10726e+06	3.43239e+06	8.17591e+06	6.32762e+06	7.47184e+06	7.1411e+06	9.71837e+06	1.08056e+07	0.430606	-1.21556	4.08262e-05	1	1.23243	down
Com_2003_neg	2-Methylpentanedioic acid	C6 H10 O4	146.058	3.486	145.05	No results	No results	Full match	7.23887e+06	1.06345e+07	1.55021e+07	1.33123e+07	1.19504e+07	1.58273e+07	3.38776e+06	3.3327e+06	4.15172e+06	3.89349e+06	5.13385e+06	4.19894e+06	3.09005	1.62763	4.47603e-05	1	1.35365	up
Com_1712_neg	Pseudoginsenoside-RT5	C36 H62 O10	654.434	6.301	653.427	No results	No results	Full match	1.74213e+07	2.9543e+07	3.53415e+07	2.73195e+07	3.83465e+07	3.62138e+07	5.0861e+06	4.36293e+06	8.66966e+06	9.71539e+06	1.02655e+07	9.78063e+06	3.8468	1.94366	4.65409e-05	1	1.54864	up
Com_5350_neg	Rauwolscine hydrochloride	C21 H27 Cl N2 O3	390.171	6.142	389.163	No results	No results	Full match	882770	1.5172e+06	1.4792e+06	1.26851e+06	1.95183e+06	1.70826e+06	4.7688e+06	7.52649e+06	6.16394e+06	8.29109e+06	3.94522e+06	3.29975e+06	0.259088	-1.94849	4.83386e-05	1	1.28006	down
Com_5162_neg	4-Acetamidobutyric Acid	C6 H11 N O3	145.074	5.914	144.066	No results	No results	Full match	5.02497e+06	5.3761e+06	5.84748e+06	5.77994e+06	6.20612e+06	7.61753e+06	2.4842e+06	3.30772e+06	2.89127e+06	2.57425e+06	3.06652e+06	4.13034e+06	1.94275	0.958102	5.06974e-05	1	1.05286	up
Com_2898_neg	7beta-Hydroxylathyrol	C20 H30 O5	350.209	7.146	349.202	No results	No results	Full match	1.9877e+06	1.75925e+06	3.12491e+06	2.41381e+06	3.57087e+06	2.86199e+06	1.26909e+07	6.30028e+06	7.30069e+06	6.14692e+06	7.17224e+06	5.95029e+06	0.344998	-1.53534	6.1325e-05	1	1.08426	down
Com_8740_neg	Sinapoyl O-hexoside	C17 H22 O10	386.122	5.261	385.115	No results	No results	Full match	267410	435524	707772	548412	358238	261124	2.60562e+06	1.55024e+06	1.27764e+06	1.70989e+06	1.21491e+06	1.70146e+06	0.256316	-1.964	6.18866e-05	1	1.17476	down
Com_7246_neg	OxPG (18:0-18:1+2O)	C42 H81 O12 P	808.534	8.066	807.526	No results	Invalid mass	No results	4.93443e+06	3.05961e+06	1.08653e+06	2.6562e+06	1.13175e+06	1.50937e+06	141312	652825	219907	125862	120919	127608	10.3555	3.37232	6.33495e-05	1	1.55053	up
Com_2989_neg	Estrone	C18 H22 O2	270.164	6.578	269.157	Invalid mass	No results	No results	1.08311e+07	1.459e+07	1.76697e+07	1.40566e+07	1.65778e+07	1.79774e+07	2.00655e+06	4.87431e+06	3.71175e+06	3.29343e+06	1.44402e+06	2.19884e+06	5.2315	2.38722	6.97079e-05	1	1.32396	up
Com_1384_neg	Propylparaben	C10 H12 O3	134.073	6.128	179.071	Invalid mass	Invalid mass	No results	5.34916e+06	5.46806e+06	2.7621e+06	4.81755e+06	5.8591e+06	5.18239e+06	4.75243e+07	4.25325e+07	4.6125e+07	4.07961e+07	5.76067e+07	1.19212e+07	0.119423	-3.06585	8.04441e-05	1	1.7943	down
Com_16032_neg	Arctiin	C27 H34 O11	534.208	5.062	533.201	No results	No results	Full match	526684	690674	650703	827223	675900	687821	196108	158148	211320	292585	163998	344160	2.97076	1.57083	9.09698e-05	1	1.26843	up
Com_12665_neg	Coumarin 151	C10 H6 F3 N O2	229.035	1.312	228.028	No results	No results	Full match	699480	1.62717e+06	1.47603e+06	1.3815e+06	1.18204e+06	1.43913e+06	352861	377549	258876	531833	449655	613126	3.02077	1.59491	9.46691e-05	1	1.16209	up
Com_9422_neg	1-phenyl-5-[5-(trifluoromethyl)-1H-pyrazol-4-yl]-1H-1,2,3,4-tetraazole	C11 H7 F3 N6	280.069	5.528	279.062	Full match	No results	No results	3.07301e+06	1.01284e+06	1.00201e+06	1.04376e+06	1.80623e+06	2.40795e+06	578928	274546	146943	279647	241857	330367	5.58541	2.48166	9.60773e-05	1	1.60634	up
Com_132_neg	tetranor-12(R)-HETE	C16 H26 O3	266.188	7.292	265.18	Full match	No results	No results	1.51867e+08	2.32709e+08	3.35071e+08	3.03859e+08	3.66538e+08	2.82707e+08	7.10516e+08	6.74918e+08	7.8924e+08	6.17847e+08	1.01076e+09	9.4618e+08	0.352198	-1.50554	9.75516e-05	1	1.57327	down
Com_10848_neg	PEtOH (15:0-16:3)	C36 H65 O8 P	656.446	8.333	655.439	No results	Invalid mass	No results	2.33974e+06	1.69693e+06	1.24969e+06	1.16232e+06	472725	1.30699e+06	306520	95706	136026	346826	138935	77643.7	7.4691	2.90093	0.00010419	1	1.47213	up
Com_4169_neg	Glutaric Acid	C5 H8 O4	132.042	4.735	131.035	No results	No results	Full match	4.37628e+06	5.53999e+06	6.75646e+06	5.69391e+06	6.47609e+06	7.14668e+06	8.67041e+06	9.83371e+06	1.10634e+07	1.14263e+07	1.2789e+07	1.43109e+07	0.528527	-0.91995	0.000104362	1	1.47095	down
Com_9908_neg	Biopterin	C9 H11 N5 O3	237.086	2.619	236.079	Full match	No results	Full match	97377.4	153283	182540	153674	93623.8	163303	1.90828e+06	2.88206e+06	814360	1.00845e+06	840315	561123	0.105283	-3.24765	0.000107075	1	1.3475	down
Com_670_neg	Nobiletin	C21 H22 O8	402.13	8.303	401.122	No results	No results	Full match	2.67263e+06	4.41446e+06	6.79675e+06	4.43805e+06	7.79264e+06	4.62657e+06	1.35706e+08	2.59894e+07	5.31699e+07	1.42517e+08	6.06606e+07	2.77243e+07	0.0689623	-3.85805	0.000107809	1	1.71694	down
Com_14109_neg	Saikosaponin C	C48 H78 O17	926.527	7.367	925.522	No results	No results	Full match	472114	1.20802e+06	1.12884e+06	780589	415657	1.23227e+06	106349	155134	116802	146938	115672	114565	6.93285	2.79345	0.000112909	1	1.64375	up
Com_217_neg	MGMG (18:2)	C27 H48 O9	516.33	9.247	515.322	No results	No results	Full match	5.45719e+08	3.19209e+08	1.65089e+08	2.55068e+08	2.28102e+08	2.02763e+08	9.3053e+06	1.95845e+07	6.4349e+06	2.12728e+07	1.38151e+06	4.60038e+06	27.4204	4.77718	0.000122829	1	1.44455	up
Com_11924_neg	Ginkgolic Acid	C22 H34 O3	346.251	9.212	345.243	No results	No results	Full match	909510	1.45547e+06	1.91016e+06	1.95404e+06	1.0521e+06	1.42896e+06	445453	412447	576651	582203	451876	482459	2.95153	1.56146	0.000125412	1	1.25572	up
Com_18_neg	Corchorifatty acid F	C18 H32 O5	328.225	6.278	327.217	Full match	No results	No results	3.3245e+09	4.19357e+09	5.16011e+09	4.86228e+09	5.98395e+09	4.66044e+09	1.72507e+09	2.8505e+09	2.23149e+09	2.11585e+09	2.69227e+09	2.69431e+09	1.96966	0.977947	0.000135589	1	1.73098	up
Com_307_neg	8-iso-13,14-dihydro-15-keto Prostaglandin F2α	C20 H34 O5	354.24	7.494	353.233	Full match	No results	No results	5.18318e+07	7.50106e+07	1.14871e+08	8.69974e+07	7.38964e+07	7.53993e+07	1.7134e+08	2.11816e+08	1.66203e+08	1.93401e+08	4.04591e+08	2.10507e+08	0.35203	-1.50623	0.000157589	1	1.38018	down
Com_75_neg	Tetranor-12R-HETE	C16 H26 O3	266.188	7.115	265.18	Full match	No results	No results	4.99849e+08	6.57828e+08	8.01789e+08	7.74866e+08	9.49222e+08	7.56574e+08	1.2366e+09	1.31947e+09	1.30497e+09	1.29147e+09	1.74489e+09	1.86392e+09	0.506788	-0.980546	0.000158805	1	1.57331	down
Com_8752_neg	S-Adenosyl-L-homocysteine	C14 H20 N6 O5 S	384.123	5.276	383.116	No results	No results	Full match	89138.8	69164.1	76778.4	72167.8	92810.7	74091.3	1.69402e+06	578255	1.38337e+06	748920	4.16307e+06	2.67501e+06	0.0421743	-4.56749	0.000162116	1	1.62741	down
Com_1123_neg	(±)9(10)-DiHOME	C18 H34 O4	314.245	7.581	313.238	Full match	No results	No results	3.24142e+06	4.86499e+06	8.02411e+06	8.53083e+06	9.67713e+06	8.70265e+06	1.85813e+07	1.70625e+07	2.35639e+07	2.57908e+07	3.77716e+07	3.85976e+07	0.266727	-1.90656	0.000169253	1	1.063	down
Com_2120_neg	Aldosterone	C21 H28 O5	360.19	5.242	359.182	Invalid mass	No results	No results	3.54173e+06	6.29357e+06	9.55527e+06	5.09968e+06	9.79758e+06	9.64478e+06	2.48556e+07	1.92307e+07	2.79484e+07	2.28822e+07	2.85165e+07	3.598e+07	0.275589	-1.85941	0.000170323	1	1.12618	down
Com_3138_neg	Phe-Pro	C14 H18 N2 O3	262.132	5.473	261.124	No results	No results	Full match	4.05745e+06	4.21845e+06	5.74158e+06	4.85796e+06	5.59497e+06	6.21659e+06	1.42801e+07	9.22555e+06	1.15217e+07	9.98276e+06	1.9536e+07	1.8018e+07	0.371675	-1.42789	0.000178541	1	1.66945	down
Com_7723_neg	Scutellarin	C21 H18 O12	462.081	4.799	461.073	No results	No results	Full match	1.67677e+06	1.04949e+06	817384	1.16385e+06	1.62164e+06	2.06241e+06	2.76749e+06	3.60194e+06	3.39185e+06	3.70035e+06	5.22756e+06	4.64717e+06	0.359591	-1.47557	0.00018397	1	1.05294	down
Com_7779_neg	LPE 19:1	C24 H48 N O7 P	493.317	10.066	492.309	No results	Full match	Full match	4.29311e+06	3.70613e+06	4.39278e+06	4.37231e+06	4.20597e+06	4.64713e+06	1.18022e+06	1.84979e+06	1.1883e+06	1.34391e+06	786118	687340	3.64107	1.86436	0.000191484	1	1.14503	up
Com_7184_neg	B Liriopesides B	C39 H62 O12	722.422	6.016	721.415	No results	No results	Full match	398565	829645	563354	309427	399048	486813	4.4236e+06	4.33304e+06	5.14604e+06	5.3214e+06	1.30445e+06	1.6209e+06	0.13485	-2.89057	0.000195114	1	1.69229	down
Com_857_neg	3-Isopropylmalic acid	C7 H12 O5	176.068	1.566	175.061	Full match	No results	Full match	6.71438e+07	7.14978e+07	9.58954e+07	8.59933e+07	6.47742e+07	8.83958e+07	4.67581e+07	5.44394e+07	5.59533e+07	4.66599e+07	3.92549e+07	4.02956e+07	1.67172	0.741333	0.000201387	1	1.4444	up
Com_583_neg	Caffeine	C8 H10 N4 O2	194.079	1.567	193.071	Invalid mass	No results	No match	1.14793e+08	1.24132e+08	1.5905e+08	1.64694e+08	1.28835e+08	1.06011e+08	5.16152e+07	8.03537e+07	8.46242e+07	8.32362e+07	7.22497e+07	6.28871e+07	1.83351	0.87461	0.000209704	1	1.53051	up
Com_1686_neg	Astragaloside II	C43 H70 O15	826.471	6.495	825.463	No results	No results	Full match	1.26983e+07	1.44972e+07	1.34316e+07	8.81936e+06	1.07912e+07	1.08307e+07	1.98336e+07	2.73384e+07	2.91766e+07	3.68323e+07	4.4131e+07	2.21537e+07	0.396001	-1.33643	0.000213674	1	1.03225	down
Com_8770_neg	LPC 22:5	C30 H52 N O7 P	615.353	9.618	614.346	No results	Invalid mass	No results	1.31184e+06	1.79292e+06	3.53225e+06	3.10167e+06	1.24496e+06	2.40958e+06	359093	885364	210599	594878	236451	233944	5.31408	2.40982	0.000219158	1	1.16151	up
Com_871_neg	Lysope 16:0	C21 H44 N O7 P	453.285	9.522	452.278	No results	No results	Full match	9.31345e+07	3.50988e+07	3.40973e+07	5.82868e+07	3.33774e+07	5.49859e+07	6.76975e+06	1.77037e+07	7.37873e+06	1.5106e+07	5.13722e+06	3.78815e+06	5.529	2.46702	0.000221018	1	1.30844	up
Com_10396_neg	Rehmannioside A	C21 H32 O15	524.175	4.957	523.166	No results	No results	Full match	1.31259e+06	1.9064e+06	1.72719e+06	1.75708e+06	1.59487e+06	1.48592e+06	234248	314552	330087	325916	798635	480908	3.93828	1.97757	0.00022699	1	1.60956	up
Com_1841_neg	N-Acetylglucosamine 1-phosphate	C8 H16 N O9 P	301.056	1.44	300.049	No results	No results	Full match	3.3207e+07	1.70069e+07	1.37153e+07	1.99085e+07	1.48767e+07	2.24703e+07	7.53557e+06	5.82662e+06	1.16664e+07	8.06631e+06	5.46052e+06	6.18356e+06	2.7087	1.4376	0.000227061	1	1.23221	up
Com_1063_neg	LPC 14:0	C22 H46 N O7 P	513.307	8.723	512.299	No results	Invalid mass	No results	7.20199e+07	1.26891e+07	2.27038e+07	4.87494e+07	2.51653e+07	4.27268e+07	1.15313e+06	3.3449e+06	1.06156e+06	1.96199e+06	124063	161130	28.7	4.84298	0.000420716	1	1.34972	up
Com_173_neg	LPE 18:3	C23 H42 N O7 P	475.27	8.658	474.262	No results	Full match	No results	6.8903e+08	4.06254e+08	3.63167e+08	5.08684e+08	3.87367e+08	4.27496e+08	8.89146e+06	2.04682e+07	5.69618e+06	1.66348e+07	1.12456e+06	716861	51.9688	5.69957	0.000426102	1	1.44176	up
Com_4629_neg	Troxerutin	C33 H42 O19	742.231	1.562	741.224	No results	No results	Full match	467529	596700	568627	541474	820369	615066	5.5421e+06	4.35625e+06	5.25646e+06	1.78812e+06	2.49946e+06	1.54269e+06	0.172016	-2.53939	0.000443701	1	1.05455	down
Com_903_neg	Cucurbitacin E	C32 H44 O8	556.304	6.816	277.145	No results	No results	Full match	6.86856e+06	9.93919e+06	2.56643e+06	9.9103e+06	2.63479e+06	2.40753e+06	1.85609e+07	2.22014e+07	2.44596e+07	3.04767e+07	8.85736e+07	8.11344e+07	0.129337	-2.9508	0.000448513	1	1.17716	down
Com_3120_neg	N-Caffeoylagmatine	C14 H20 N4 O3	292.152	5.604	291.145	No results	No results	Full match	2.90027e+06	4.70815e+06	8.39583e+06	3.634e+06	5.82405e+06	4.06283e+06	9.33725e+06	1.06979e+07	1.02988e+07	1.78761e+07	1.52772e+07	1.44385e+07	0.378888	-1.40016	0.000453699	1	1.62747	down
Com_8961_neg	Maltitol	C12 H24 O11	344.132	1.436	389.131	No results	No results	Full match	1.36752e+06	1.02875e+06	1.15558e+06	1.38846e+06	4.06975e+06	1.66906e+06	588548	149157	173828	146050	403331	499567	5.44719	2.44551	0.000457035	1	1.35156	up
Com_4283_neg	Ala-Leu	C9 H18 N2 O3	202.132	5.109	201.124	No results	Full match	Full match	2.24097e+06	3.04979e+06	3.53916e+06	3.77241e+06	2.66649e+06	3.80707e+06	7.34065e+06	5.44298e+06	6.60879e+06	6.66494e+06	1.09403e+07	1.38116e+07	0.375441	-1.41334	0.000458502	1	1.27357	down
Com_8159_neg	Xanthotoxol geranyl ether	C21 H22 O4	338.151	6.284	337.144	No results	No results	Full match	304505	385835	440660	411656	482571	413606	1.56008e+06	1.69672e+06	1.05211e+06	1.53488e+06	4.75185e+06	2.63814e+06	0.184289	-2.43996	0.000464214	1	1.67258	down
Com_742_neg	Flavin mononucleotide (FMN)	C17 H21 N4 O9 P	456.105	5.319	455.098	Full match	Full match	Full match	4.91516e+07	7.09726e+07	8.35226e+07	9.30018e+07	1.41277e+08	7.90217e+07	2.50971e+07	2.90165e+07	2.67042e+07	3.1851e+07	4.34458e+07	4.55058e+07	2.56396	1.35837	0.000491681	1	1.54468	up
Com_609_neg	(+/-)9,10-dihydroxy-12Z-octadecenoic acid	C18 H34 O4	314.245	7.343	313.238	Full match	No results	No results	1.9885e+07	3.55003e+07	5.02837e+07	4.82263e+07	6.43569e+07	4.85595e+07	9.71856e+07	9.10907e+07	1.03305e+08	1.26065e+08	1.7252e+08	1.92305e+08	0.340986	-1.55222	0.000499788	1	1.40795	down
Com_639_neg	(-)-Caryophyllene oxide	C15 H24 O	220.182	6.807	219.175	Full match	No results	No results	1.69449e+07	2.55373e+07	2.89197e+07	3.04921e+07	8.05539e+07	2.15803e+07	1.26515e+08	1.27657e+08	1.4643e+08	1.28815e+08	1.67602e+08	1.68858e+08	0.235632	-2.08539	0.000556603	1	1.74714	down
Com_411_neg	Palmitic Acid	C16 H32 O2	256.24	10.603	255.233	Full match	No results	Full match	2.36743e+08	1.9327e+08	1.62186e+08	2.15371e+08	6.98581e+07	1.66303e+08	2.93014e+07	9.26606e+07	3.59446e+07	6.26128e+07	2.90623e+07	2.45098e+07	3.80796	1.92902	0.00057752	0.972222	1.48261	up
Com_768_neg	Suberic acid	C8 H14 O4	128.083	5.665	127.076	Invalid mass	Invalid mass	No results	1.73185e+07	1.88421e+07	2.5394e+07	2.25703e+07	2.47513e+07	2.01512e+07	4.73911e+07	4.02035e+07	5.63103e+07	4.75722e+07	8.71954e+07	1.04966e+08	0.336326	-1.57207	0.000581175	1	1.03994	down
Com_8284_neg	Ixoside	C16 H20 O11	388.101	1.443	387.094	No results	No results	Full match	3.17005e+06	3.19643e+06	2.61522e+06	1.59528e+06	1.12315e+06	4.15817e+06	593499	514258	589448	504203	499672	577495	4.83695	2.2741	0.000597292	1	1.70062	up
Com_2048_neg	Lumichrome	C12 H10 N4 O2	242.079	5.176	241.072	No results	No results	Full match	1.22137e+07	1.75283e+07	2.33009e+07	1.62625e+07	1.75308e+07	1.95303e+07	2.80188e+07	2.99398e+07	3.51042e+07	2.88045e+07	3.35266e+07	2.7944e+07	0.580167	-0.785461	0.000650145	1	1.69103	down
Com_2507_neg	Adenosine diphosphate (ADP)	C10 H15 N5 O10 P2	389.073	1.527	388.065	Invalid mass	No results	No results	6.93573e+06	3.88152e+06	8.23064e+06	8.37107e+06	2.66037e+07	1.22035e+07	1.73114e+06	1.70345e+06	1.53077e+06	1.27658e+06	1.885e+06	3.00998e+06	5.94654	2.57205	0.000752241	1	1.46642	up
Com_6642_neg	Mevalonic acid	C6 H12 O4	148.073	4.695	147.066	No results	No results	Full match	2.44702e+06	3.23294e+06	3.50929e+06	3.2332e+06	3.45417e+06	3.50057e+06	4.38099e+06	4.78219e+06	4.5672e+06	4.95423e+06	6.39632e+06	7.31038e+06	0.598222	-0.741248	0.000845574	1	1.39669	down
Com_3708_neg	LPC 19:1	C27 H54 N O7 P	581.369	10.187	580.361	No results	Invalid mass	No results	1.71027e+06	2.09445e+06	3.59705e+06	2.10612e+06	2.28323e+06	1.85492e+06	9.51471e+06	1.34923e+07	7.63794e+06	7.57507e+06	3.87795e+06	4.17149e+06	0.294925	-1.76158	0.000936509	1	1.55742	down
Com_12204_neg	Kaempferol-3-gentiobioside	C27 H30 O16	610.156	9.309	609.148	No results	No results	Full match	680393	803537	840376	653966	1.15142e+06	802942	2.0464e+06	999857	1.6941e+06	1.60789e+06	1.43137e+06	2.32296e+06	0.488254	-1.0343	0.00102127	0.972222	1.344	down
Com_2187_neg	Stearic acid	C18 H36 O2	284.271	11.488	283.264	Full match	No results	Full match	2.69899e+07	1.91153e+07	1.61333e+07	1.89476e+07	9.46471e+06	1.40441e+07	5.49254e+06	1.02562e+07	7.59272e+06	7.60098e+06	3.61133e+06	3.88645e+06	2.72358	1.4455	0.00102487	0.972222	1.56118	up
Com_4186_neg	LPA 16:1	C19 H37 O7 P	408.227	9.204	407.22	No results	Full match	No results	1.97598e+06	977899	1.01003e+06	840603	970220	823239	1.27742e+07	9.08488e+06	1.10369e+07	1.17374e+07	2.76689e+06	2.34114e+06	0.132645	-2.91435	0.00105934	1	1.5933	down
Com_9128_neg	Pantetheine	C11 H22 N2 O4 S	278.13	3.494	277.123	No results	No results	Full match	383722	806113	989721	977719	512980	920072	1.36663e+06	1.96614e+06	1.55248e+06	1.6192e+06	3.8488e+06	3.32748e+06	0.335532	-1.57548	0.00119018	1	1.57081	down
Com_3142_neg	LPA 16:4	C19 H31 O7 P	402.18	7.67	401.173	No results	Full match	No results	1.71498e+06	1.02105e+06	704145	709075	1.46418e+06	1.08834e+06	8.94554e+06	9.4982e+06	7.54452e+06	4.43407e+06	1.47164e+06	4.99047e+06	0.181696	-2.4604	0.00124524	0.972222	1.12868	down
Com_3424_neg	beta-Acetoxyisovalerylalkannin	C23 H26 O8	430.161	9.602	429.154	No results	No results	Full match	550396	344926	1.02132e+06	297000	1.64792e+06	293845	1.12069e+07	2.61651e+06	5.71206e+06	1.55974e+07	4.28934e+06	1.1682e+06	0.102374	-3.28808	0.00141769	0.972222	1.59997	down
Com_10109_neg	LPA 20:5	C23 H37 O7 P	456.228	8.925	455.221	No results	Full match	No match	238956	165588	173270	202615	187556	155122	2.36483e+06	2.43556e+06	2.77954e+06	2.8628e+06	856248	357617	0.0963496	-3.37558	0.00143028	1	1.72598	down
Com_7872_neg	Pentadecanoic acid	C15 H30 O2	242.224	10.16	241.217	Full match	No results	Full match	3.29263e+06	3.63966e+06	2.63865e+06	4.55699e+06	1.18647e+06	2.71706e+06	453225	1.51122e+06	515931	1.35018e+06	373512	309400	3.99504	1.99821	0.00152174	0.944444	1.43568	up
Com_4014_neg	2-(2-carboxy-2-methylpropyl)-4,6-dimethylbenzoic acid	C14 H18 O4	250.118	6.379	249.11	Invalid mass	No results	No results	3.96567e+06	4.42552e+06	3.94531e+06	4.07635e+06	4.34913e+06	4.5598e+06	8.66362e+06	7.47976e+06	8.23785e+06	6.15862e+06	9.7463e+06	1.5153e+07	0.45675	-1.13052	0.00156854	1	1.4011	down
Com_8188_neg	Sedoheptulose Anhydride	C7 H12 O6	192.063	2.254	191.056	No results	No results	Full match	1.93121e+06	3.28182e+06	2.55234e+06	2.63752e+06	2.0068e+06	2.97881e+06	3.97498e+06	3.818e+06	4.63232e+06	3.32803e+06	4.06867e+06	4.3398e+06	0.636894	-0.650876	0.00163315	1	1.30492	down
Com_1217_neg	16-Hydroxyhexadecanoic acid	C16 H32 O3	254.224	9.95	253.217	Invalid mass	No results	No match	4.28922e+07	4.52501e+07	4.90704e+07	6.20435e+07	2.07973e+07	4.75834e+07	1.04687e+07	2.98724e+07	1.0045e+07	1.83779e+07	7.31432e+06	6.38348e+06	3.24559	1.69848	0.00165909	0.972222	1.42444	up
Com_7035_neg	Maltotriitol	C18 H34 O16	506.187	9.615	505.18	No results	No results	Full match	341461	547271	1.6407e+06	1.34767e+06	764095	1.63397e+06	4.03674e+06	5.32878e+06	3.57653e+06	4.43183e+06	3.11953e+06	4.17367e+06	0.254394	-1.97486	0.00169308	1	1.00816	down
Com_1073_neg	LPG 16:4	C22 H37 O9 P	476.217	7.705	475.21	No results	Full match	No results	5.61877e+07	6.01545e+07	5.73658e+07	7.56794e+07	4.98623e+07	7.44771e+07	1.24686e+07	1.11002e+07	5.26006e+06	8.19317e+06	727302	4.16504e+06	8.91643	3.15647	0.00188979	1	1.27921	up
Com_1927_neg	Curcurbitacin IIA	C32 H50 O8	562.35	6.486	561.343	No results	No results	Full match	6.68279e+06	1.31137e+07	1.79662e+07	6.08907e+06	1.26931e+07	1.61616e+07	2.15463e+07	3.21635e+07	3.03393e+07	2.91808e+07	3.42576e+07	3.66996e+07	0.394743	-1.34101	0.00192797	1	1.06767	down
Com_3297_neg	3-[4-(tert-butyl)anilino]-2-(3-thienylcarbonyl)acrylonitrile	C18 H18 N2 O S	310.117	3.073	309.109	Invalid mass	No results	No results	2.10975e+06	4.93251e+06	6.04877e+06	4.92304e+06	2.54303e+06	5.27302e+06	6.28342e+06	1.11135e+07	8.61329e+06	9.50096e+06	1.82097e+07	1.90588e+07	0.354908	-1.49448	0.00218863	1	1.02509	down
Com_4792_neg	(2S)-4-Oxo-2-phenyl-3,4-dihydro-2H-chromen-7-yl beta-D-glucopyranoside	C21 H22 O8	448.141	7.043	447.134	Invalid mass	No results	No results	1.08896e+06	1.49666e+06	1.26033e+06	1.25974e+06	2.24379e+06	1.80207e+06	4.26997e+06	2.17815e+06	4.49822e+06	4.88542e+06	1.08073e+07	1.08655e+07	0.244013	-2.03497	0.00234044	0.972222	1.42002	down
Com_4465_neg	2-Hydroxy-2-methylbutanoic acid	C5 H10 O3	118.063	4.964	117.055	No results	No results	Full match	2.58311e+06	4.17719e+06	6.21645e+06	5.45443e+06	4.9703e+06	5.44065e+06	7.13988e+06	9.84585e+06	9.37181e+06	1.06873e+07	7.4304e+06	9.44722e+06	0.534881	-0.902709	0.00235017	1	1.13832	down
Com_943_neg	Prostaglandin D2	C20 H32 O5	352.228	9.525	351.221	Invalid mass	No results	No results	6.33698e+06	6.07938e+06	1.23325e+07	1.51076e+07	969520	8.64723e+06	4.09576e+07	8.55422e+07	4.72778e+07	7.05204e+07	3.46377e+07	2.90888e+07	0.160614	-2.63833	0.00254578	1	1.09094	down
Com_11163_neg	Glycyrrhizin	C42 H62 O16	822.401	6.156	821.393	No results	No results	Full match	1.65867e+06	1.99667e+06	2.2167e+06	1.86147e+06	2.42626e+06	1.76681e+06	636936	1.70201e+06	421868	696253	782464	695625	2.41665	1.27301	0.00256453	0.972222	1.62868	up
Com_2928_neg	gamma-Glu-Leu	C11 H20 N2 O5	260.137	4.697	259.13	No results	No results	Full match	4.19428e+06	4.64228e+06	5.9485e+06	5.1331e+06	4.40831e+06	5.19205e+06	7.89785e+06	8.61841e+06	1.04405e+07	1.25542e+07	2.06729e+07	2.33681e+07	0.353295	-1.50105	0.00271473	1	1.33596	down
Com_302_neg	12,13-EODE	C18 H32 O3	296.235	7.762	295.227	No results	No results	Full match	1.98406e+07	1.81272e+07	6.72488e+06	1.5744e+07	1.39416e+07	1.25218e+07	4.15437e+08	3.17977e+08	2.96205e+08	3.72331e+08	1.45295e+07	2.9334e+08	0.0508242	-4.29834	0.00294302	0.916667	1.4289	down
Com_2017_neg	20-Hydroxy prostaglandin F2α	C20 H34 O6	370.235	6.926	369.228	Full match	No results	No results	9.53418e+06	1.07663e+07	1.38869e+07	1.68461e+07	1.56321e+07	1.25713e+07	1.91307e+07	1.59829e+07	2.0859e+07	3.01889e+07	3.47143e+07	2.37946e+07	0.547706	-0.868526	0.0031074	0.972222	1.47962	down
Com_13820_neg	Pyridoxal 5-phosphate monohydrate	C8 H12 N O7 P	265.035	2.587	264.028	No results	No results	Full match	893642	946116	1.03186e+06	1.36806e+06	738438	1.09188e+06	754829	652209	635657	544171	700916	722852	1.51347	0.597864	0.00334451	0.972222	1.30193	up
Com_199_neg	Elaidic acid	C18 H34 O2	282.256	10.822	281.248	Full match	No results	Full match	5.80885e+08	4.56594e+08	5.05273e+08	6.02343e+08	1.98148e+08	3.69088e+08	9.68349e+07	3.10027e+08	1.16029e+08	2.21173e+08	7.68585e+07	5.92321e+07	3.08165	1.6237	0.00339904	0.944444	1.35472	up
Com_4377_neg	5-Hydroxytryptophan	C11 H12 N2 O3	220.085	2.827	219.077	Full match	Full match	Full match	2.21472e+06	6.5784e+06	7.35936e+06	1.0997e+07	5.57123e+06	6.19748e+06	2.57659e+06	1.95673e+06	1.68811e+06	1.72437e+06	2.38743e+06	2.87813e+06	2.94581	1.55867	0.00420139	0.916667	1.22407	up
Com_4705_neg	Tetradecanedioic acid	C14 H26 O4	258.183	7.128	257.176	Full match	No results	No results	898170	1.34014e+06	1.51465e+06	1.60502e+06	1.98577e+06	1.42606e+06	2.78049e+06	2.48536e+06	3.58927e+06	4.88795e+06	1.02669e+07	1.21621e+07	0.242447	-2.04426	0.00446581	1	1.58559	down
Com_12759_neg	Ziyuglycoside I	C41 H66 O13	766.449	7.004	765.442	No results	No results	Full match	1.11061e+06	1.59653e+06	815417	666425	873356	1.10292e+06	486710	584924	611517	515273	563605	603724	1.83176	0.873233	0.00483166	1	1.30301	up
Com_12868_neg	trans-zeatin 9-O-glucoside	C16 H23 N5 O6	381.165	5.035	380.159	No results	No results	Full match	919912	867124	790769	932200	856418	806030	1.64928e+06	1.62549e+06	1.02828e+06	1.06194e+06	1.4088e+06	2.03501e+06	0.587192	-0.768097	0.00492035	1	1.11487	down
Com_1811_neg	Prostaglandin F1β	C20 H36 O5	712.509	9.193	711.502	Invalid mass	Invalid mass	No results	3.40004e+07	2.93189e+07	2.43954e+07	2.12912e+07	5.09517e+06	1.76635e+07	906575	6.79946e+06	733175	1.96272e+06	55621.6	56440.3	12.5323	3.64758	0.00507598	0.972222	1.19865	up
Com_3794_neg	1-(2,4-diphenyl-2,3-dihydro-1H-1,5-benzodiazepin-1-yl)propan-1-one	C24 H22 N2 O	355.174	5.415	354.167	Invalid mass	No results	No results	2.25103e+06	3.09749e+06	3.40121e+06	3.95753e+06	3.90411e+06	3.57362e+06	1.74365e+07	9.44678e+06	7.67876e+06	9.89144e+06	5.99517e+06	3.95164e+06	0.371046	-1.43033	0.00522671	0.972222	1.51687	down
Com_5240_neg	L-Dopa	C9 H11 N O4	197.069	5.518	196.061	Full match	No results	Full match	1.54854e+06	1.99302e+06	2.44339e+06	1.67838e+06	2.21761e+06	1.73782e+06	2.42522e+06	8.27098e+06	3.77576e+06	5.22157e+06	3.50805e+06	3.34974e+06	0.437597	-1.19233	0.00536527	0.972222	1.18808	down
Com_5569_neg	4-Pyridoxic acid	C8 H9 N O4	183.053	3.79	182.046	Full match	Full match	Full match	1.30123e+06	2.18162e+06	5.30484e+06	2.97045e+06	2.79705e+06	7.81027e+06	779168	1.0092e+06	946091	1.36519e+06	937804	948367	3.73641	1.90165	0.00545122	0.972222	1.13607	up
Com_2574_neg	8-Isoprostaglandin F1α	C20 H36 O5	356.256	7.118	355.249	Full match	No results	No results	5.01989e+06	4.24144e+06	8.47974e+06	9.18411e+06	2.58931e+07	8.66233e+06	2.08927e+06	3.9078e+06	3.27035e+06	1.4726e+06	3.99594e+06	2.74218e+06	3.51757	1.81458	0.00556954	1	1.06043	up
Com_14107_neg	4-Hydroxy-L-Glutamic Acid	C5 H7 N O5	161.032	2.474	160.025	No results	No results	Full match	454469	652282	948737	1.29046e+06	970606	1.03792e+06	452223	305324	461575	467475	508349	474983	2.00548	1.00395	0.00598962	0.888889	1.27632	up
Com_12724_neg	Alnustone	C19 H18 O	262.135	5.255	261.127	No results	No results	Full match	250759	383017	438820	368247	474701	360574	546431	616502	767331	763344	1.25907e+06	2.09378e+06	0.376438	-1.40951	0.00603509	1	1.25263	down
Com_1204_neg	LPC 16:0	C24 H50 N O7 P	541.338	9.625	540.331	No results	Invalid mass	No results	5.14591e+07	4.11886e+07	4.89543e+07	6.33233e+07	3.72069e+07	4.8117e+07	1.51861e+07	4.28261e+07	1.53339e+07	2.60521e+07	8.89597e+06	1.11927e+07	2.42913	1.28044	0.00605233	0.944444	1.19253	up
Com_7987_neg	Ajugol	C15 H24 O9	348.143	5.657	347.135	No results	No results	Full match	219191	314238	388094	296167	350057	296285	723775	795252	1.01762e+06	1.01811e+06	4.74618e+06	5.39985e+06	0.136053	-2.87776	0.00641064	1	1.55417	down
Com_8931_neg	Callistephin chloride	C21 H21 Cl O10	468.08	4.821	467.073	No results	No results	Full match	904084	995348	1.32906e+06	1.12935e+06	1.73346e+06	1.10846e+06	1.37363e+06	2.54696e+06	2.16467e+06	1.7945e+06	3.91236e+06	4.3936e+06	0.444822	-1.1687	0.00741791	0.972222	1.07404	down
Com_180_neg	Furanodiene	C15 H20 O	216.151	6.824	215.144	No results	No results	Full match	4.57002e+08	6.47219e+08	5.7055e+08	2.73564e+08	1.82274e+08	6.4078e+08	7.57147e+07	5.09531e+07	2.92337e+08	6.38757e+07	2.0355e+08	2.4043e+08	2.99008	1.58018	0.010251	0.888889	1.13678	up
Com_104_neg	14,15-Dehydrocrepenynic acid	C18 H28 O2	276.209	9.223	275.201	No results	No results	Full match	7.98658e+08	9.16802e+08	1.00667e+09	1.05534e+09	5.0748e+08	7.76688e+08	4.98758e+08	7.66196e+08	3.54443e+08	5.43916e+08	2.35114e+08	2.75844e+08	1.89272	0.92046	0.0110717	0.944444	1.40927	up
Com_2614_neg	2-Oxobutyric acid	C4 H6 O3	102.031	1.703	101.024	Full match	No results	No results	2.63154e+06	3.89989e+06	4.94474e+06	3.9816e+06	4.69229e+06	5.59176e+06	6.05526e+06	5.87798e+06	1.0349e+07	1.17253e+07	6.58506e+06	2.72099e+07	0.379659	-1.39722	0.0161444	1	1.37378	down
Com_3500_neg	trans-10-Heptadecenoic acid	C17 H32 O2	268.24	10.387	267.233	Full match	No results	No results	1.37487e+07	1.23174e+07	1.21536e+07	1.50994e+07	5.39435e+06	1.11881e+07	2.77221e+06	1.24984e+07	3.61073e+06	6.94226e+06	1.69177e+06	1.36994e+06	2.41997	1.27499	0.0195202	0.861111	1.19763	up
Com_4846_neg	LPG 17:1	C23 H45 O9 P	496.28	9.55	495.273	No results	Full match	No results	9.02264e+06	1.38686e+06	161344	770548	318119	551785	130675	252230	115465	153113	77049.3	81388.4	15.0771	3.91429	0.0203302	0.972222	1.32097	up
Com_7586_neg	LPC 20:1	C28 H56 N O7 P	595.385	10.726	594.378	No results	Invalid mass	No results	720324	639559	911532	626894	417053	673605	1.69887e+06	4.72995e+06	1.72643e+06	2.99763e+06	915352	662611	0.313331	-1.67424	0.0203949	0.916667	1.35023	down
Com_7928_neg	Pectolinarin	C29 H34 O15	622.193	10.839	621.185	No results	No results	Full match	1.65068e+06	1.83029e+06	1.80094e+06	2.66321e+06	2.0181e+06	4.50358e+06	4.45452e+06	2.59625e+06	5.23441e+06	3.1328e+06	3.52759e+06	4.616e+06	0.614	-0.70369	0.0209806	0.861111	1.12296	down
Com_1071_neg	Dihydroartemisinin	C15 H24 O5	284.162	6.351	283.155	No results	Full match	No results	5.63318e+07	6.41192e+07	6.24497e+07	7.16519e+07	8.59951e+07	5.86532e+07	3.04532e+07	5.75939e+07	2.61674e+07	3.30289e+07	5.68724e+07	5.50271e+07	1.54047	0.623366	0.0216448	0.944444	1.20401	up
Com_4684_neg	13,14-dihydro Prostaglandin F1α	C20 H38 O5	716.54	9.696	715.533	Invalid mass	No results	No results	9.48628e+06	2.5343e+06	6.02955e+06	5.49617e+06	1.23723e+06	5.01139e+06	442198	5.23145e+06	283923	1.6083e+06	46745.4	70253.7	3.8781	1.95535	0.02232	0.888889	1.09423	up
Com_5406_neg	LPA 16:0	C19 H39 O7 P	410.243	10.088	409.236	No results	Full match	Full match	1.3153e+06	1.27404e+06	624535	8.10335e+06	1.61336e+06	1.62552e+06	3.6137e+06	6.93803e+06	5.00294e+06	4.0368e+06	6.24973e+06	3.85305e+06	0.490199	-1.02856	0.0275425	0.833333	1.06074	down
Com_14258_neg	Flavin Adenine Dinucleotide	C27 H33 N9 O15 P2	785.157	12.014	784.15	No results	No results	Full match	614621	515981	417521	702825	1.41514e+06	1.2144e+06	371883	443615	435424	324126	462810	457841	1.95556	0.967582	0.0308127	0.888889	1.2365	up
Com_10853_neg	Phytanic acid	C20 H40 O2	312.303	11.785	311.296	No results	No results	Full match	1.75854e+06	1.8508e+06	2.34666e+06	2.22238e+06	932125	1.40737e+06	568953	2.21948e+06	572141	1.22888e+06	288031	301537	2.03086	1.02209	0.0335443	0.861111	1.05296	up
Com_3902_neg	Syringic acid	C9 H10 O5	198.053	5.042	197.046	No results	No results	Full match	3.88294e+06	4.08731e+06	5.00286e+06	4.65474e+06	5.26862e+06	4.48286e+06	5.91392e+06	4.28192e+06	7.81022e+06	6.6606e+06	1.11133e+07	1.57282e+07	0.531553	-0.911714	0.0337989	0.888889	1.06961	down
Com_9122_neg	4-Methylphenol	C7 H8 O	108.057	5.034	107.05	Full match	No results	Full match	760549	798707	1.2069e+06	819739	1.36538e+06	1.34862e+06	1.28244e+06	1.13295e+06	1.4637e+06	1.47145e+06	2.99661e+06	4.21741e+06	0.501402	-0.995961	0.0417332	0.861111	1.21843	down
Com_3805_neg	Sibirioside A	C21 H28 O12	472.158	1.427	471.151	No results	No results	Full match	2.50565e+06	2.29311e+06	4.56895e+06	5.70458e+06	3.86093e+06	5.68564e+06	1.60498e+07	1.20932e+07	1.39223e+07	1.72882e+06	1.48787e+07	1.18981e+07	0.348853	-1.51931	0.0471091	0.833333	1.05945	down
Com_17720_neg	10-Deacetylbaccatin-III	C29 H36 O10	544.233	5.406	543.226	No results	No results	Full match	91846.8	63600.9	192071	222220	382960	86485.8	47333.9	70177	53704.9	46213	114454	95891.2	2.42928	1.28053	0.0476349	0.805556	1.19426	up
