# Supplementary material for: Combined Transcriptome and Metabolome Analysis of a New Species of Microalgae from the Tibetan Plateau and Its Response to Sewage Treatment
Source: MDPI journal article supplement (doi:10.3390/w14213391), 2022-10-26
Supplement: s1 [file s1 › Table S3.xlt]

## Sheet: YH_3.vs.YH_2_pos_YH_3vsYH_2_keg
Description	Pvalue	Ratio	Count	Type	ID
Alanine, aspartate and glutamate metabolism	0.0455343	1	3	Meta	L-Glutamic acid; L-Asparagine; Adenylosuccinic acid
Alanine, aspartate and glutamate metabolism	0.599495	0.338182	186	Tran	Cluster-60005.43098|Cluster-35280.0|Cluster-64110.0|Cluster-62169.0|Cluster-60005.45431|Cluster-60005.67777|Cluster-60005.34832|Cluster-60005.36373|Cluster-60005.77744|Cluster-44249.0|Cluster-60005.39340|Cluster-60005.14518|Cluster-60005.37731|Cluster-60005.101599|Cluster-32400.0|Cluster-60005.43497|Cluster-60005.5187|Cluster-60005.36522|Cluster-60005.48183|Cluster-60005.117660|Cluster-60005.6783…
Ascorbate and aldarate metabolism	0.129359	1	2	Meta	D-Glucarate; D-Galacturonic acid
Ascorbate and aldarate metabolism	0.797954	0.313589	90	Tran	Cluster-60005.90914|Cluster-60005.88885|Cluster-60005.48323|Cluster-60788.0|Cluster-60005.86749|Cluster-60005.39628|Cluster-60005.12800|Cluster-60005.84532|Cluster-60005.27961|Cluster-60005.76829|Cluster-60005.46495|Cluster-60005.1341|Cluster-10328.1|Cluster-63669.0|Cluster-60005.48803|Cluster-35336.0|Cluster-60005.70967|Cluster-60005.59536|Cluster-48970.0|Cluster-60005.104120|Cluster-60005.75059…
Cutin, suberine and wax biosynthesis	0.129359	1	2	Meta	Oleic Acid; Docosanoic acid
Cutin, suberine and wax biosynthesis	0.505225	0.355556	16	Tran	Cluster-60005.29203|Cluster-15561.0|Cluster-60005.36447|Cluster-60005.48885|Cluster-60005.52189|Cluster-60005.50777|Cluster-60005.67710|Cluster-60005.95664|Cluster-27100.0|Cluster-60005.101181|Cluster-60005.32475|Cluster-60005.58259|Cluster-60005.27365|Cluster-60005.59296|Cluster-60005.27366|Cluster-60005.38209
Arginine biosynthesis	0.129359	1	2	Meta	L-Glutamic acid; N-Acetylornithine
Arginine biosynthesis	0.4832	0.347973	103	Tran	Cluster-60005.83061|Cluster-60005.58050|Cluster-62169.0|Cluster-44249.0|Cluster-60005.14518|Cluster-48636.0|Cluster-60005.54400|Cluster-60005.25917|Cluster-60005.33364|Cluster-60005.48183|Cluster-60005.46827|Cluster-60005.57650|Cluster-44997.0|Cluster-60005.55009|Cluster-60005.52037|Cluster-60005.45504|Cluster-60005.25229|Cluster-60005.46415|Cluster-60005.48003|Cluster-60005.100417|Cluster-60005.…
Biosynthesis of unsaturated fatty acids	0.129359	1	2	Meta	Oleic Acid; Docosanoic acid
Biosynthesis of unsaturated fatty acids	0.741924	0.321981	104	Tran	Cluster-60005.93960|Cluster-60005.57550|Cluster-60005.92335|Cluster-76534.0|Cluster-60005.107380|Cluster-60005.75022|Cluster-60005.59420|Cluster-60005.34137|Cluster-26113.0|Cluster-60005.34504|Cluster-60005.48671|Cluster-60005.27967|Cluster-60005.95178|Cluster-60005.76338|Cluster-60005.11151|Cluster-60005.60062|Cluster-60005.23710|Cluster-60005.31732|Cluster-60005.5217|Cluster-60005.106362|Cluste…
Sulfur relay system	0.129359	1	2	Meta	S-Adenosylmethionine; Thiamine
Sulfur relay system	0.737051	0.309735	35	Tran	Cluster-26983.1|Cluster-60005.74540|Cluster-60005.79308|Cluster-60005.59913|Cluster-60005.6685|Cluster-60005.79133|Cluster-60005.19135|Cluster-60005.80536|Cluster-60005.46717|Cluster-60005.15379|Cluster-60005.45630|Cluster-60005.79351|Cluster-60005.84553|Cluster-72169.0|Cluster-69095.1|Cluster-60005.73748|Cluster-60005.74618|Cluster-60005.37865|Cluster-60005.89294|Cluster-60005.86309|Cluster-6000…
Zeatin biosynthesis	0.134767	0.75	3	Meta	S-Adenosylmethionine; Adenosine 5'-Diphosphate; Adenine
Zeatin biosynthesis	0.914431	0.2	5	Tran	Cluster-60005.61818|Cluster-34813.0|Cluster-60005.28966|Cluster-60005.71840|Cluster-60005.15389
Pyrimidine metabolism	0.25352	0.571429	4	Meta	Cytidine; 2'-Deoxycytidine; 5-Methylcytosine; Cytosine
Pyrimidine metabolism	0.992968	0.297274	338	Tran	Cluster-60005.77344|Cluster-60005.69342|Cluster-60005.58356|Cluster-41570.0|Cluster-60005.43499|Cluster-60005.43498|Cluster-60005.57967|Cluster-60005.51511|Cluster-60005.57152|Cluster-60005.40799|Cluster-60005.118456|Cluster-60005.6594|Cluster-60005.91537|Cluster-60005.118287|Cluster-32580.0|Cluster-60005.102551|Cluster-77571.0|Cluster-50145.0|Cluster-60005.22791|Cluster-67394.0|Cluster-60005.815…
Glutathione metabolism	0.297008	0.666667	2	Meta	L-Glutamic acid; Pyroglutamic acid
Glutathione metabolism	0.744897	0.326821	184	Tran	Cluster-60005.81156|Cluster-60005.43637|Cluster-59532.0|Cluster-64040.0|Cluster-60005.3344|Cluster-60005.102414|Cluster-60005.66079|Cluster-70644.0|Cluster-60005.7006|Cluster-60005.73441|Cluster-48863.0|Cluster-60005.57825|Cluster-60005.74382|Cluster-60005.91829|Cluster-4157.0|Cluster-60005.5597|Cluster-60005.49057|Cluster-60005.119722|Cluster-60005.95936|Cluster-60005.39628|Cluster-3866.0|Cluste…
Glycerophospholipid metabolism	0.297008	0.666667	2	Meta	Phosphocholine; Acetylcholine
Glycerophospholipid metabolism	0.470513	0.347518	196	Tran	Cluster-60005.38350|Cluster-60005.111869|Cluster-36693.0|Cluster-60005.43311|Cluster-60005.79883|Cluster-32281.0|Cluster-60005.42737|Cluster-60005.74706|Cluster-60005.83101|Cluster-60005.54061|Cluster-60005.76834|Cluster-60005.48586|Cluster-8527.0|Cluster-60005.86382|Cluster-60005.29806|Cluster-60005.87718|Cluster-60005.86608|Cluster-60005.96220|Cluster-60005.94091|Cluster-60005.98921|Cluster-343…
Nicotinate and nicotinamide metabolism	0.297008	0.666667	2	Meta	Trigonelline; 6-Hydroxynicotinic acid
Nicotinate and nicotinamide metabolism	0.869234	0.297297	66	Tran	Cluster-11976.0|Cluster-60005.110476|Cluster-60005.100001|Cluster-60005.42392|Cluster-35280.0|Cluster-60005.44483|Cluster-60005.66989|Cluster-60005.75120|Cluster-73461.0|Cluster-60005.47957|Cluster-60005.66233|Cluster-60005.46870|Cluster-60005.104658|Cluster-45013.0|Cluster-60005.52602|Cluster-73619.0|Cluster-64038.0|Cluster-60005.83451|Cluster-60005.37731|Cluster-60005.41534|Cluster-73461.1|Clus…
Pentose phosphate pathway	0.362205	1	1	Meta	D-Erythrose 4-phosphate
Pentose phosphate pathway	0.336351	0.359629	155	Tran	Cluster-60005.30804|Cluster-60005.96343|Cluster-60005.21366|Cluster-60005.20867|Cluster-60005.43766|Cluster-60005.39512|Cluster-60005.42434|Cluster-60005.102414|Cluster-60005.65380|Cluster-60005.110691|Cluster-60005.15368|Cluster-60005.74382|Cluster-60005.48581|Cluster-60005.50846|Cluster-60005.47436|Cluster-59757.0|Cluster-60005.63612|Cluster-60005.35477|Cluster-60005.32570|Cluster-60005.114585|…
Pentose and glucuronate interconversions	0.362205	1	1	Meta	D-Galacturonic acid
Pentose and glucuronate interconversions	0.88357	0.292079	59	Tran	Cluster-60005.85528|Cluster-60005.46294|Cluster-60005.76366|Cluster-60005.88885|Cluster-60005.51723|Cluster-60005.70967|Cluster-60005.5314|Cluster-4397.0|Cluster-60005.72277|Cluster-60005.52061|Cluster-8182.0|Cluster-60005.96343|Cluster-60005.110691|Cluster-60005.109841|Cluster-60005.116063|Cluster-71305.0|Cluster-60005.101717|Cluster-59757.0|Cluster-60005.50846|Cluster-65413.0|Cluster-60005.2949…
Oxidative phosphorylation	0.362205	1	1	Meta	Adenosine 5'-Diphosphate
Oxidative phosphorylation	0.000698112	0.408904	496	Tran	Cluster-60005.44600|Cluster-60005.84166|Cluster-60005.3014|Cluster-60005.90158|Cluster-60005.90652|Cluster-60005.35770|Cluster-60005.79302|Cluster-60005.36180|Cluster-60005.42635|Cluster-60005.61935|Cluster-60005.119844|Cluster-60005.93520|Cluster-60005.33756|Cluster-60005.24122|Cluster-60005.88396|Cluster-60005.33759|Cluster-60005.116789|Cluster-60005.33888|Cluster-60005.62362|Cluster-10114.0|Cl…
Photosynthesis	0.362205	1	1	Meta	Adenosine 5'-Diphosphate
Photosynthesis	0.000294289	0.481159	166	Tran	Cluster-60005.51841|Cluster-60005.58059|Cluster-60005.29204|Cluster-60005.44607|Cluster-60005.27627|Cluster-60005.63167|Cluster-63999.0|Cluster-60005.44726|Cluster-60005.50634|Cluster-60005.65270|Cluster-60005.49758|Cluster-60005.48818|Cluster-60005.52961|Cluster-60005.65382|Cluster-60005.93122|Cluster-60005.55278|Cluster-60005.40615|Cluster-60005.6730|Cluster-60005.96831|Cluster-60005.58542|Clus…
Carbapenem biosynthesis	0.362205	1	1	Meta	L-Glutamic acid
Carbapenem biosynthesis	0.446728	1	1	Tran	Cluster-60005.87424
Taurine and hypotaurine metabolism	0.362205	1	1	Meta	L-Glutamic acid
Taurine and hypotaurine metabolism	0.157041	0.444444	28	Tran	Cluster-64110.0|Cluster-60005.18345|Cluster-60005.78169|Cluster-60467.0|Cluster-60005.61753|Cluster-60005.84428|Cluster-3284.0|Cluster-60005.98263|Cluster-60005.96878|Cluster-59791.0|Cluster-60005.84577|Cluster-60005.58467|Cluster-60005.28691|Cluster-60005.46478|Cluster-13736.0|Cluster-60005.4612|Cluster-60005.29387|Cluster-60005.39688|Cluster-60005.53401|Cluster-60005.24806|Cluster-60005.60119|C…
Glyoxylate and dicarboxylate metabolism	0.362205	1	1	Meta	L-Glutamic acid
Glyoxylate and dicarboxylate metabolism	0.0656355	0.383978	278	Tran	Cluster-60005.41181|Cluster-25745.0|Cluster-60005.117176|Cluster-24534.0|Cluster-60005.50200|Cluster-60005.67770|Cluster-60005.56012|Cluster-60005.43255|Cluster-60005.75651|Cluster-60005.30259|Cluster-60005.38214|Cluster-60005.38740|Cluster-60005.31700|Cluster-60005.14518|Cluster-60005.101599|Cluster-60005.42591|Cluster-60005.84737|Cluster-60005.77626|Cluster-60005.79164|Cluster-60005.119306|Clus…
Butanoate metabolism	0.362205	1	1	Meta	L-Glutamic acid
Butanoate metabolism	0.296805	0.375723	65	Tran	Cluster-60005.107277|Cluster-60005.70812|Cluster-60005.70810|Cluster-60005.97173|Cluster-60005.117176|Cluster-60005.5942|Cluster-60005.70728|Cluster-64110.0|Cluster-60005.46368|Cluster-60005.52589|Cluster-60005.35948|Cluster-55672.0|Cluster-60005.60761|Cluster-60005.75651|Cluster-60005.38661|Cluster-60005.21717|Cluster-60005.9238|Cluster-62173.0|Cluster-60005.80031|Cluster-60005.116440|Cluster-60…
C5-Branched dibasic acid metabolism	0.362205	1	1	Meta	L-Glutamic acid
C5-Branched dibasic acid metabolism	0.762448	0.297297	22	Tran	Cluster-60005.4763|Cluster-60005.33456|Cluster-60005.38561|Cluster-60005.79279|Cluster-60005.54699|Cluster-60005.59372|Cluster-60005.46368|Cluster-60005.64975|Cluster-60005.117741|Cluster-60005.117743|Cluster-60005.109056|Cluster-60005.51506|Cluster-60005.67748|Cluster-60005.57046|Cluster-60005.44032|Cluster-50215.0|Cluster-60005.44031|Cluster-60005.89359|Cluster-60005.53194|Cluster-60005.80235|C…
Carbon fixation in photosynthetic organisms	0.362205	1	1	Meta	D-Erythrose 4-phosphate
Carbon fixation in photosynthetic organisms	0.153272	0.372881	242	Tran	Cluster-60005.96343|Cluster-60005.74944|Cluster-60005.45103|Cluster-60005.43766|Cluster-60005.53020|Cluster-60005.64543|Cluster-60005.78012|Cluster-60005.43255|Cluster-60005.45233|Cluster-60005.50796|Cluster-60005.57107|Cluster-60005.46724|Cluster-60005.44683|Cluster-60005.104460|Cluster-60005.110691|Cluster-60005.74386|Cluster-60005.46024|Cluster-60005.48581|Cluster-60005.50846|Cluster-60005.694…
Folate biosynthesis	0.362205	1	1	Meta	Sepiapterin
Folate biosynthesis	0.936628	0.271084	45	Tran	Cluster-60005.119627|Cluster-60005.55913|Cluster-60005.45351|Cluster-60005.12454|Cluster-60005.43437|Cluster-60005.48132|Cluster-60005.91373|Cluster-60005.74051|Cluster-37035.0|Cluster-60005.16668|Cluster-60005.55051|Cluster-60005.53766|Cluster-60005.114784|Cluster-60005.37744|Cluster-60005.95930|Cluster-60005.98978|Cluster-60005.41188|Cluster-9303.0|Cluster-60005.54378|Cluster-60005.46822|Cluste…
Brassinosteroid biosynthesis	0.362205	1	1	Meta	Brassinolide
Brassinosteroid biosynthesis	0.756437	0.266667	4	Tran	Cluster-60005.119636|Cluster-60005.72946|Cluster-60005.111187|Cluster-47540.0
Nitrogen metabolism	0.362205	1	1	Meta	L-Glutamic acid
Nitrogen metabolism	0.984777	0.254464	57	Tran	Cluster-60005.14518|Cluster-60005.68890|Cluster-62169.0|Cluster-60005.91604|Cluster-60005.112250|Cluster-60005.51426|Cluster-60005.91037|Cluster-60005.39209|Cluster-60005.66962|Cluster-59060.0|Cluster-60005.52114|Cluster-60005.66368|Cluster-60005.17956|Cluster-60005.45849|Cluster-60005.37577|Cluster-60005.103168|Cluster-60005.99474|Cluster-60005.49401|Cluster-39403.0|Cluster-69214.0|Cluster-60005…
Biosynthesis of amino acids	0.544381	0.461538	6	Meta	S-Adenosylmethionine; L-Saccharopine; N-Acetylornithine; D-Erythrose 4-phosphate; L-Cystathionine; L-Asparagine
Biosynthesis of amino acids	0.82745	0.330649	657	Tran	Cluster-60005.119560|Cluster-60005.96343|Cluster-60005.21366|Cluster-24534.0|Cluster-60005.20867|Cluster-60005.117179|Cluster-60005.59950|Cluster-60005.104179|Cluster-60005.34599|Cluster-70233.0|Cluster-60005.22243|Cluster-60005.54400|Cluster-60005.50846|Cluster-40620.0|Cluster-60005.89305|Cluster-60005.98364|Cluster-60005.56545|Cluster-60005.18718|Cluster-60005.71771|Cluster-60005.73367|Cluster-…
Fatty acid biosynthesis	1	0.5	1	Meta	Oleic Acid
Fatty acid biosynthesis	0.221752	0.374286	131	Tran	Cluster-60005.93960|Cluster-80144.1|Cluster-60005.105161|Cluster-60005.69014|Cluster-60005.65178|Cluster-60005.75022|Cluster-60005.29055|Cluster-60005.61426|Cluster-60005.19956|Cluster-60005.44978|Cluster-60005.15817|Cluster-60005.34504|Cluster-54663.0|Cluster-60005.48671|Cluster-60005.49293|Cluster-60005.85845|Cluster-56040.0|Cluster-9163.0|Cluster-60005.99700|Cluster-64157.0|Cluster-60005.17299…
Cysteine and methionine metabolism	1	0.375	3	Meta	S-Adenosylmethionine; L-Homocystine; L-Cystathionine
Cysteine and methionine metabolism	0.831924	0.32133	232	Tran	Cluster-60005.117179|Cluster-60005.48875|Cluster-60005.49897|Cluster-60005.104179|Cluster-60005.43255|Cluster-60005.81694|Cluster-70233.0|Cluster-60005.39340|Cluster-60005.82784|Cluster-60005.69376|Cluster-60005.110202|Cluster-60005.39462|Cluster-60005.105473|Cluster-53219.0|Cluster-4157.0|Cluster-30709.0|Cluster-60005.98718|Cluster-79988.0|Cluster-60005.52392|Cluster-26076.1|Cluster-60005.16449|…
Lysine biosynthesis	1	0.5	1	Meta	L-Saccharopine
Lysine biosynthesis	0.78567	0.306748	50	Tran	Cluster-60005.96737|Cluster-60005.11784|Cluster-60005.11783|Cluster-60005.27527|Cluster-57635.0|Cluster-37438.0|Cluster-60005.49896|Cluster-60005.45140|Cluster-60005.58607|Cluster-60005.42708|Cluster-60005.22691|Cluster-81576.0|Cluster-60005.55232|Cluster-29286.0|Cluster-60005.48898|Cluster-60005.98364|Cluster-60005.74485|Cluster-60005.55467|Cluster-60005.86140|Cluster-60005.111532|Cluster-60005.…
Amino sugar and nucleotide sugar metabolism	1	0.5	1	Meta	D-Galacturonic acid
Amino sugar and nucleotide sugar metabolism	0.461466	0.347967	214	Tran	Cluster-60005.65668|Cluster-60005.85528|Cluster-60005.57712|Cluster-60005.88885|Cluster-60005.29441|Cluster-60005.1870|Cluster-60005.39512|Cluster-60005.42434|Cluster-60005.45025|Cluster-60005.17274|Cluster-60005.40053|Cluster-60005.20273|Cluster-60005.30417|Cluster-60005.75556|Cluster-60005.5187|Cluster-60005.48464|Cluster-60005.32750|Cluster-60005.55270|Cluster-60005.86860|Cluster-60005.115838|…
Arachidonic acid metabolism	1	0.5	1	Meta	Prostaglandin A2
Arachidonic acid metabolism	0.611212	0.333333	60	Tran	Cluster-60005.81156|Cluster-60005.111629|Cluster-60005.94622|Cluster-60005.27046|Cluster-59532.0|Cluster-62544.0|Cluster-60005.97153|Cluster-60005.39516|Cluster-60005.41774|Cluster-60005.92216|Cluster-60005.114216|Cluster-34185.0|Cluster-60639.0|Cluster-60005.31212|Cluster-60005.42022|Cluster-62584.0|Cluster-60005.25055|Cluster-60005.6478|Cluster-60005.94444|Cluster-60005.30425|Cluster-71901.0|Cl…
Thiamine metabolism	1	0.5	1	Meta	Thiamine
Thiamine metabolism	0.55992	0.339806	35	Tran	Cluster-60005.45630|Cluster-60005.81226|Cluster-60005.30490|Cluster-60005.45699|Cluster-60005.39064|Cluster-60005.63026|Cluster-76112.0|Cluster-60005.59913|Cluster-60005.79133|Cluster-60005.19135|Cluster-60005.26335|Cluster-60005.46717|Cluster-60005.100576|Cluster-60005.70018|Cluster-60005.67282|Cluster-60005.28534|Cluster-69095.1|Cluster-60005.70017|Cluster-60005.39052|Cluster-60005.15334|Cluste…
Riboflavin metabolism	1	0.5	1	Meta	Riboflavin
Riboflavin metabolism	0.249683	0.397959	39	Tran	Cluster-60005.69341|Cluster-60005.43666|Cluster-81734.0|Cluster-60005.97210|Cluster-60005.35120|Cluster-60005.105468|Cluster-60005.49166|Cluster-60005.102193|Cluster-60005.102192|Cluster-60005.102191|Cluster-60005.8750|Cluster-57349.0|Cluster-60005.9763|Cluster-60005.23367|Cluster-60005.56622|Cluster-60005.124418|Cluster-60005.71442|Cluster-51035.1|Cluster-60005.28166|Cluster-60005.26999|Cluster-…
Vitamin B6 metabolism	1	0.5	1	Meta	D-Erythrose 4-phosphate
Vitamin B6 metabolism	0.838071	0.284211	27	Tran	Cluster-60005.45776|Cluster-60005.124968|Cluster-60005.79192|Cluster-55302.0|Cluster-60005.84066|Cluster-60005.81848|Cluster-5809.0|Cluster-60005.44769|Cluster-60005.60724|Cluster-60005.60072|Cluster-60005.97092|Cluster-60005.97093|Cluster-60005.72181|Cluster-60005.17635|Cluster-60005.58851|Cluster-40550.0|Cluster-81247.0|Cluster-60005.81181|Cluster-69590.0|Cluster-60005.44585|Cluster-60005.56458…
Carotenoid biosynthesis	1	0.5	1	Meta	Canthaxanthin
Carotenoid biosynthesis	0.393922	0.360406	71	Tran	Cluster-60005.47958|Cluster-60005.35898|Cluster-60005.74549|Cluster-60005.69956|Cluster-60005.57196|Cluster-38447.0|Cluster-60005.52867|Cluster-6599.0|Cluster-60005.55702|Cluster-60005.84846|Cluster-8903.0|Cluster-60005.121422|Cluster-60005.57732|Cluster-60005.57972|Cluster-60005.51575|Cluster-60005.95102|Cluster-60005.40200|Cluster-60005.51209|Cluster-60005.58262|Cluster-60005.40742|Cluster-6000…
Betalain biosynthesis	1	0.5	1	Meta	Levodopa
Betalain biosynthesis	0.805958	0.25	5	Tran	Cluster-60005.71442|Cluster-60005.86591|Cluster-79615.0|Cluster-60005.63442|Cluster-60005.114394
Carbon metabolism	1	0.5	1	Meta	D-Erythrose 4-phosphate
Carbon metabolism	0.188623	0.356643	867	Tran	Cluster-60005.96343|Cluster-60005.117176|Cluster-24534.0|Cluster-60005.20867|Cluster-60005.60571|Cluster-60005.59950|Cluster-60005.18368|Cluster-60005.43255|Cluster-60005.30259|Cluster-60005.38214|Cluster-60005.31344|Cluster-60005.38740|Cluster-60005.46724|Cluster-60005.14721|Cluster-60005.22243|Cluster-60005.21366|Cluster-60005.43956|Cluster-60005.46024|Cluster-60005.71385|Cluster-60005.50846|Cl…
Plant hormone signal transduction	1	0.5	1	Meta	Brassinolide
Plant hormone signal transduction	0.447652	0.352459	86	Tran	Cluster-60005.51194|Cluster-8969.1|Cluster-60005.85086|Cluster-60005.50445|Cluster-60005.99373|Cluster-60005.87734|Cluster-60005.98013|Cluster-60005.40228|Cluster-60005.34901|Cluster-60005.43776|Cluster-60005.89798|Cluster-60005.53606|Cluster-60005.39464|Cluster-60005.35743|Cluster-60005.36949|Cluster-60005.51235|Cluster-60005.46885|Cluster-60005.106508|Cluster-60005.81547|Cluster-60005.47534|Clu…
Histidine metabolism	1	0.4	2	Meta	L-Glutamic acid; Ergothioneine
Histidine metabolism	0.975282	0.261468	57	Tran	Cluster-60005.34599|Cluster-60005.96737|Cluster-60005.98364|Cluster-60005.83161|Cluster-60005.108301|Cluster-60005.76366|Cluster-28211.0|Cluster-60005.70967|Cluster-53420.0|Cluster-60005.38313|Cluster-60005.52656|Cluster-8182.0|Cluster-60005.68386|Cluster-60005.107247|Cluster-60005.102590|Cluster-60005.54366|Cluster-72463.0|Cluster-81877.0|Cluster-60005.31078|Cluster-75397.0|Cluster-60005.26869|C…
Phenylalanine metabolism	1	0.4	2	Meta	Vanillin; Pseudoephedrine
Phenylalanine metabolism	0.519156	0.345238	58	Tran	Cluster-60005.34966|Cluster-60005.108033|Cluster-42638.0|Cluster-28211.0|Cluster-60005.107935|Cluster-53420.0|Cluster-4639.0|Cluster-60005.11724|Cluster-60005.62863|Cluster-60005.58954|Cluster-60005.107247|Cluster-60005.89656|Cluster-60005.37313|Cluster-60005.66633|Cluster-60005.74056|Cluster-60005.98369|Cluster-60005.74024|Cluster-60005.95749|Cluster-60005.117700|Cluster-60005.112281|Cluster-953…
