# Supplementary material for: Combined Transcriptome and Metabolome Analysis of a New Species of Microalgae from the Tibetan Plateau and Its Response to Sewage Treatment
Source: MDPI journal article supplement (doi:10.3390/w14213391), 2022-10-26
Supplement: s1 [file s1 › Table S4.xlt]

## Sheet: YH_3.vs.YH_2_neg_YH_3vsYH_2_keg
Description	Pvalue	Ratio	Count	Type	ID
Arachidonic acid metabolism	0.0926297	0.75	3	Meta	Prostaglandin J2; Thromboxane B2; Prostaglandin D2
Arachidonic acid metabolism	0.611212	0.333333	60	Tran	Cluster-60005.81156|Cluster-60005.111629|Cluster-60005.94622|Cluster-60005.27046|Cluster-59532.0|Cluster-62544.0|Cluster-60005.97153|Cluster-60005.39516|Cluster-60005.41774|Cluster-60005.92216|Cluster-60005.114216|Cluster-34185.0|Cluster-60639.0|Cluster-60005.31212|Cluster-60005.42022|Cluster-62584.0|Cluster-60005.25055|Cluster-60005.6478|Cluster-60005.94444|Cluster-60005.30425|Cluster-71901.0|Cl…
Fatty acid biosynthesis	0.0982178	1	2	Meta	Stearic acid; Palmitic Acid
Fatty acid biosynthesis	0.221752	0.374286	131	Tran	Cluster-60005.93960|Cluster-80144.1|Cluster-60005.105161|Cluster-60005.69014|Cluster-60005.65178|Cluster-60005.75022|Cluster-60005.29055|Cluster-60005.61426|Cluster-60005.19956|Cluster-60005.44978|Cluster-60005.15817|Cluster-60005.34504|Cluster-54663.0|Cluster-60005.48671|Cluster-60005.49293|Cluster-60005.85845|Cluster-56040.0|Cluster-9163.0|Cluster-60005.99700|Cluster-64157.0|Cluster-60005.17299…
Fatty acid degradation	0.0982178	1	2	Meta	Palmitic Acid; Glutaric Acid
Fatty acid degradation	0.778701	0.321429	144	Tran	Cluster-60005.57550|Cluster-80144.1|Cluster-60005.92335|Cluster-76534.0|Cluster-60005.75651|Cluster-60005.60062|Cluster-60005.29055|Cluster-60005.19956|Cluster-60005.34137|Cluster-60005.15817|Cluster-9291.0|Cluster-54663.0|Cluster-60005.98364|Cluster-60005.70154|Cluster-60005.52245|Cluster-9163.0|Cluster-60005.53262|Cluster-60541.1|Cluster-60005.99700|Cluster-64157.0|Cluster-60005.70728|Cluster-6…
Riboflavin metabolism	0.0982178	1	2	Meta	Flavin Adenine Dinucleotide; Lumichrome
Riboflavin metabolism	0.249683	0.397959	39	Tran	Cluster-60005.69341|Cluster-60005.43666|Cluster-81734.0|Cluster-60005.97210|Cluster-60005.35120|Cluster-60005.105468|Cluster-60005.49166|Cluster-60005.102193|Cluster-60005.102192|Cluster-60005.102191|Cluster-60005.8750|Cluster-57349.0|Cluster-60005.9763|Cluster-60005.23367|Cluster-60005.56622|Cluster-60005.124418|Cluster-60005.71442|Cluster-51035.1|Cluster-60005.28166|Cluster-60005.26999|Cluster-…
Plant hormone signal transduction	0.235128	0.666667	2	Meta	Abscisic Acid; Jasmonic acid
Plant hormone signal transduction	0.447652	0.352459	86	Tran	Cluster-60005.51194|Cluster-8969.1|Cluster-60005.85086|Cluster-60005.50445|Cluster-60005.99373|Cluster-60005.87734|Cluster-60005.98013|Cluster-60005.40228|Cluster-60005.34901|Cluster-60005.43776|Cluster-60005.89798|Cluster-60005.53606|Cluster-60005.39464|Cluster-60005.35743|Cluster-60005.36949|Cluster-60005.51235|Cluster-60005.46885|Cluster-60005.106508|Cluster-60005.81547|Cluster-60005.47534|Clu…
Ascorbate and aldarate metabolism	0.316832	1	1	Meta	Ascorbic acid
Ascorbate and aldarate metabolism	0.797954	0.313589	90	Tran	Cluster-60005.90914|Cluster-60005.88885|Cluster-60005.48323|Cluster-60788.0|Cluster-60005.86749|Cluster-60005.39628|Cluster-60005.12800|Cluster-60005.84532|Cluster-60005.27961|Cluster-60005.76829|Cluster-60005.46495|Cluster-60005.1341|Cluster-10328.1|Cluster-63669.0|Cluster-60005.48803|Cluster-35336.0|Cluster-60005.70967|Cluster-60005.59536|Cluster-48970.0|Cluster-60005.104120|Cluster-60005.75059…
Fatty acid elongation	0.316832	1	1	Meta	Palmitic Acid
Fatty acid elongation	0.680471	0.324324	60	Tran	Cluster-60005.80854|Cluster-32595.0|Cluster-60005.81886|Cluster-60005.108023|Cluster-60005.62044|Cluster-60005.86117|Cluster-60005.107380|Cluster-60005.39575|Cluster-60005.66628|Cluster-60005.50446|Cluster-60005.106362|Cluster-62498.0|Cluster-60005.50878|Cluster-60005.23026|Cluster-60005.34640|Cluster-60005.38640|Cluster-60005.42587|Cluster-60005.57906|Cluster-52393.0|Cluster-60005.59512|Cluster-…
Cutin, suberine and wax biosynthesis	0.316832	1	1	Meta	Palmitic Acid
Cutin, suberine and wax biosynthesis	0.505225	0.355556	16	Tran	Cluster-60005.29203|Cluster-15561.0|Cluster-60005.36447|Cluster-60005.48885|Cluster-60005.52189|Cluster-60005.50777|Cluster-60005.67710|Cluster-60005.95664|Cluster-27100.0|Cluster-60005.101181|Cluster-60005.32475|Cluster-60005.58259|Cluster-60005.27365|Cluster-60005.59296|Cluster-60005.27366|Cluster-60005.38209
Carbapenem biosynthesis	0.316832	1	1	Meta	Pantetheine
Carbapenem biosynthesis	0.446728	1	1	Tran	Cluster-60005.87424
Taurine and hypotaurine metabolism	0.316832	1	1	Meta	Taurine
Taurine and hypotaurine metabolism	0.157041	0.444444	28	Tran	Cluster-64110.0|Cluster-60005.18345|Cluster-60005.78169|Cluster-60467.0|Cluster-60005.61753|Cluster-60005.84428|Cluster-3284.0|Cluster-60005.98263|Cluster-60005.96878|Cluster-59791.0|Cluster-60005.84577|Cluster-60005.58467|Cluster-60005.28691|Cluster-60005.46478|Cluster-13736.0|Cluster-60005.4612|Cluster-60005.29387|Cluster-60005.39688|Cluster-60005.53401|Cluster-60005.24806|Cluster-60005.60119|C…
C5-Branched dibasic acid metabolism	0.316832	1	1	Meta	2-Oxobutyric acid
C5-Branched dibasic acid metabolism	0.762448	0.297297	22	Tran	Cluster-60005.4763|Cluster-60005.33456|Cluster-60005.38561|Cluster-60005.79279|Cluster-60005.54699|Cluster-60005.59372|Cluster-60005.46368|Cluster-60005.64975|Cluster-60005.117741|Cluster-60005.117743|Cluster-60005.109056|Cluster-60005.51506|Cluster-60005.67748|Cluster-60005.57046|Cluster-60005.44032|Cluster-50215.0|Cluster-60005.44031|Cluster-60005.89359|Cluster-60005.53194|Cluster-60005.80235|C…
Thiamine metabolism	0.316832	1	1	Meta	Vitamin B1
Thiamine metabolism	0.55992	0.339806	35	Tran	Cluster-60005.45630|Cluster-60005.81226|Cluster-60005.30490|Cluster-60005.45699|Cluster-60005.39064|Cluster-60005.63026|Cluster-76112.0|Cluster-60005.59913|Cluster-60005.79133|Cluster-60005.19135|Cluster-60005.26335|Cluster-60005.46717|Cluster-60005.100576|Cluster-60005.70018|Cluster-60005.67282|Cluster-60005.28534|Cluster-69095.1|Cluster-60005.70017|Cluster-60005.39052|Cluster-60005.15334|Cluste…
Biotin metabolism	0.316832	1	1	Meta	Pimelic acid
Biotin metabolism	0.925855	0.267176	35	Tran	Cluster-60005.93960|Cluster-60005.80014|Cluster-60005.112265|Cluster-60005.51333|Cluster-60005.76718|Cluster-60005.107588|Cluster-60005.75022|Cluster-60005.56897|Cluster-60005.63025|Cluster-60005.1707|Cluster-60005.47817|Cluster-60005.82441|Cluster-60005.34504|Cluster-60005.48671|Cluster-60005.99894|Cluster-60005.77328|Cluster-60005.42813|Cluster-60005.61368|Cluster-60005.41661|Cluster-60005.1203…
Terpenoid backbone biosynthesis	0.316832	1	1	Meta	Mevalonic acid
Terpenoid backbone biosynthesis	0.137715	0.387879	128	Tran	Cluster-60005.30490|Cluster-60005.45100|Cluster-60005.108242|Cluster-60005.16967|Cluster-60005.41610|Cluster-60005.75651|Cluster-60005.49169|Cluster-60005.39612|Cluster-60005.82196|Cluster-60005.65276|Cluster-60005.5182|Cluster-62121.0|Cluster-60005.99901|Cluster-60005.45699|Cluster-60005.18557|Cluster-60005.67282|Cluster-60005.46535|Cluster-60005.123968|Cluster-60005.70728|Cluster-60005.81374|Cl…
Tropane, piperidine and pyridine alkaloid biosynthesis	0.316832	1	1	Meta	Piperine
Tropane, piperidine and pyridine alkaloid biosynthesis	0.580137	0.336449	36	Tran	Cluster-60005.69655|Cluster-60005.34966|Cluster-60005.108033|Cluster-60005.94270|Cluster-53420.0|Cluster-60005.11724|Cluster-60005.62863|Cluster-60005.58954|Cluster-60005.107247|Cluster-60005.89656|Cluster-60005.95749|Cluster-60005.53919|Cluster-60005.112281|Cluster-60005.71771|Cluster-60005.29506|Cluster-60005.25277|Cluster-60005.103449|Cluster-60005.25229|Cluster-60005.69869|Cluster-27493.0|Clu…
Betalain biosynthesis	0.316832	1	1	Meta	L-Dopa
Betalain biosynthesis	0.805958	0.25	5	Tran	Cluster-60005.71442|Cluster-60005.86591|Cluster-79615.0|Cluster-60005.63442|Cluster-60005.114394
Fatty acid metabolism	0.316832	1	1	Meta	Palmitic Acid
Fatty acid metabolism	0.406099	0.351275	248	Tran	Cluster-60005.93960|Cluster-60005.57550|Cluster-80144.1|Cluster-60005.81886|Cluster-60005.92335|Cluster-76534.0|Cluster-60005.65178|Cluster-60005.107380|Cluster-60005.75651|Cluster-60005.60062|Cluster-60005.29055|Cluster-60005.61426|Cluster-60005.59420|Cluster-60005.19956|Cluster-60005.34137|Cluster-60005.15817|Cluster-60005.34504|Cluster-54663.0|Cluster-60005.48671|Cluster-60005.70154|Cluster-60…
Sulfur relay system	0.316832	1	1	Meta	Vitamin B1
Sulfur relay system	0.737051	0.309735	35	Tran	Cluster-26983.1|Cluster-60005.74540|Cluster-60005.79308|Cluster-60005.59913|Cluster-60005.6685|Cluster-60005.79133|Cluster-60005.19135|Cluster-60005.80536|Cluster-60005.46717|Cluster-60005.15379|Cluster-60005.45630|Cluster-60005.79351|Cluster-60005.84553|Cluster-72169.0|Cluster-69095.1|Cluster-60005.73748|Cluster-60005.74618|Cluster-60005.37865|Cluster-60005.89294|Cluster-60005.86309|Cluster-6000…
ABC transporters	0.322657	0.6	3	Meta	Sucrose; Taurine; Vitamin B1
ABC transporters	0.833442	0.312155	113	Tran	Cluster-25900.0|Cluster-60005.14485|Cluster-60005.113324|Cluster-60005.42523|Cluster-60005.32268|Cluster-60005.54961|Cluster-51829.0|Cluster-60005.74720|Cluster-60005.47479|Cluster-60005.111452|Cluster-47945.0|Cluster-34742.0|Cluster-60005.24640|Cluster-60005.103652|Cluster-39972.0|Cluster-60005.46639|Cluster-60005.57558|Cluster-60005.31388|Cluster-60005.19264|Cluster-60005.94919|Cluster-60005.42…
Galactose metabolism	0.535446	0.5	1	Meta	Sucrose
Galactose metabolism	0.604034	0.33574	93	Tran	Cluster-60005.106763|Cluster-60005.42434|Cluster-60005.85528|Cluster-60005.40053|Cluster-60005.22243|Cluster-60005.108644|Cluster-60005.68661|Cluster-60005.114585|Cluster-60005.13292|Cluster-60005.40102|Cluster-60005.48241|Cluster-60005.49175|Cluster-60005.53604|Cluster-27353.0|Cluster-60005.97553|Cluster-35511.0|Cluster-60005.73695|Cluster-60005.67715|Cluster-60005.91883|Cluster-60005.83047|Clus…
Valine, leucine and isoleucine biosynthesis	0.535446	0.5	1	Meta	2-Oxobutyric acid
Valine, leucine and isoleucine biosynthesis	0.928962	0.279188	55	Tran	Cluster-60005.75160|Cluster-60005.4763|Cluster-60005.93747|Cluster-60005.33456|Cluster-60005.117179|Cluster-60005.48875|Cluster-60005.104179|Cluster-60005.79279|Cluster-60005.59461|Cluster-60005.95597|Cluster-70233.0|Cluster-55991.0|Cluster-60005.60335|Cluster-60005.54699|Cluster-60005.53952|Cluster-60005.59372|Cluster-60005.46368|Cluster-60005.40963|Cluster-60005.64975|Cluster-60005.117741|Clust…
Glutathione metabolism	0.535446	0.5	1	Meta	Ascorbic acid
Glutathione metabolism	0.744897	0.326821	184	Tran	Cluster-60005.81156|Cluster-60005.43637|Cluster-59532.0|Cluster-64040.0|Cluster-60005.3344|Cluster-60005.102414|Cluster-60005.66079|Cluster-70644.0|Cluster-60005.7006|Cluster-60005.73441|Cluster-48863.0|Cluster-60005.57825|Cluster-60005.74382|Cluster-60005.91829|Cluster-4157.0|Cluster-60005.5597|Cluster-60005.49057|Cluster-60005.119722|Cluster-60005.95936|Cluster-60005.39628|Cluster-3866.0|Cluste…
Starch and sucrose metabolism	0.535446	0.5	1	Meta	Sucrose
Starch and sucrose metabolism	0.231887	0.363165	280	Tran	Cluster-60005.106810|Cluster-82135.0|Cluster-60005.104173|Cluster-60005.104172|Cluster-60005.104171|Cluster-60005.57712|Cluster-60005.43880|Cluster-60005.47850|Cluster-60005.39826|Cluster-60005.42434|Cluster-60005.61429|Cluster-60005.85528|Cluster-60005.34446|Cluster-60005.40053|Cluster-60005.60145|Cluster-60005.30129|Cluster-60005.35066|Cluster-60005.63593|Cluster-60005.52525|Cluster-60005.61937…
Propanoate metabolism	0.535446	0.5	1	Meta	2-Oxobutyric acid
Propanoate metabolism	0.0582847	0.398169	174	Tran	Cluster-25745.0|Cluster-60005.120013|Cluster-60005.92478|Cluster-60005.68706|Cluster-60005.18368|Cluster-53665.0|Cluster-60005.75651|Cluster-60005.31700|Cluster-60005.51922|Cluster-60005.53438|Cluster-60005.70810|Cluster-60005.69412|Cluster-60005.47326|Cluster-60005.49293|Cluster-60005.77769|Cluster-55902.0|Cluster-65736.0|Cluster-60005.98851|Cluster-5815.0|Cluster-60005.70728|Cluster-60005.17299…
Pantothenate and CoA biosynthesis	0.535446	0.5	1	Meta	Pantetheine
Pantothenate and CoA biosynthesis	0.859193	0.3	69	Tran	Cluster-60005.75160|Cluster-60005.7800|Cluster-60005.72518|Cluster-60005.64078|Cluster-60005.117179|Cluster-60005.48875|Cluster-60005.40434|Cluster-60005.84636|Cluster-60005.124710|Cluster-60005.59461|Cluster-60005.83386|Cluster-60005.114072|Cluster-7766.0|Cluster-60005.102535|Cluster-60005.73098|Cluster-32374.0|Cluster-60005.71858|Cluster-60005.60335|Cluster-60005.36197|Cluster-60005.20706|Clust…
Carotenoid biosynthesis	0.535446	0.5	1	Meta	Abscisic Acid
Carotenoid biosynthesis	0.393922	0.360406	71	Tran	Cluster-60005.47958|Cluster-60005.35898|Cluster-60005.74549|Cluster-60005.69956|Cluster-60005.57196|Cluster-38447.0|Cluster-60005.52867|Cluster-6599.0|Cluster-60005.55702|Cluster-60005.84846|Cluster-8903.0|Cluster-60005.121422|Cluster-60005.57732|Cluster-60005.57972|Cluster-60005.51575|Cluster-60005.95102|Cluster-60005.40200|Cluster-60005.51209|Cluster-60005.58262|Cluster-60005.40742|Cluster-6000…
Cysteine and methionine metabolism	0.589361	0.5	2	Meta	2-Oxobutyric acid; S-Adenosyl-L-homocysteine
Cysteine and methionine metabolism	0.831924	0.32133	232	Tran	Cluster-60005.117179|Cluster-60005.48875|Cluster-60005.49897|Cluster-60005.104179|Cluster-60005.43255|Cluster-60005.81694|Cluster-70233.0|Cluster-60005.39340|Cluster-60005.82784|Cluster-60005.69376|Cluster-60005.110202|Cluster-60005.39462|Cluster-60005.105473|Cluster-53219.0|Cluster-4157.0|Cluster-30709.0|Cluster-60005.98718|Cluster-79988.0|Cluster-60005.52392|Cluster-26076.1|Cluster-60005.16449|…
Biosynthesis of unsaturated fatty acids	0.705786	0.375	3	Meta	Stearic acid; Adrenic acid; Palmitic Acid
Biosynthesis of unsaturated fatty acids	0.741924	0.321981	104	Tran	Cluster-60005.93960|Cluster-60005.57550|Cluster-60005.92335|Cluster-76534.0|Cluster-60005.107380|Cluster-60005.75022|Cluster-60005.59420|Cluster-60005.34137|Cluster-26113.0|Cluster-60005.34504|Cluster-60005.48671|Cluster-60005.27967|Cluster-60005.95178|Cluster-60005.76338|Cluster-60005.11151|Cluster-60005.60062|Cluster-60005.23710|Cluster-60005.31732|Cluster-60005.5217|Cluster-60005.106362|Cluste…
Lysine degradation	1	0.333333	1	Meta	Glutaric Acid
Lysine degradation	0.888368	0.301538	98	Tran	Cluster-60005.49898|Cluster-39745.0|Cluster-60005.69346|Cluster-60005.75651|Cluster-60005.60318|Cluster-60005.26590|Cluster-8830.0|Cluster-60005.98364|Cluster-60541.1|Cluster-60005.108403|Cluster-60005.35840|Cluster-60005.70728|Cluster-60005.90645|Cluster-60005.93114|Cluster-76022.0|Cluster-60005.76829|Cluster-60005.52245|Cluster-60005.74485|Cluster-60005.46495|Cluster-60005.58850|Cluster-60005.6…
Tyrosine metabolism	1	0.333333	2	Meta	Salidroside; L-Dopa
Tyrosine metabolism	0.568717	0.33913	78	Tran	Cluster-67245.0|Cluster-60005.34966|Cluster-60005.108033|Cluster-60005.110495|Cluster-28211.0|Cluster-60005.107935|Cluster-53420.0|Cluster-4639.0|Cluster-60005.11724|Cluster-60005.95749|Cluster-60005.56889|Cluster-60005.62863|Cluster-60005.58954|Cluster-60005.26737|Cluster-60005.107247|Cluster-60005.77163|Cluster-60005.44913|Cluster-60005.74056|Cluster-60005.67939|Cluster-60005.98369|Cluster-6041…
alpha-Linolenic acid metabolism	1	0.333333	1	Meta	Jasmonic acid
alpha-Linolenic acid metabolism	0.91001	0.287671	63	Tran	Cluster-60005.57550|Cluster-60005.42342|Cluster-62544.0|Cluster-60005.92335|Cluster-76534.0|Cluster-60005.8857|Cluster-60005.50514|Cluster-60005.60062|Cluster-60005.20625|Cluster-60005.42022|Cluster-60005.64314|Cluster-60005.30353|Cluster-47953.0|Cluster-60005.54829|Cluster-60005.26094|Cluster-36255.0|Cluster-51371.0|Cluster-60005.34137|Cluster-60005.78336|Cluster-60005.104726|Cluster-60005.11169…
Vitamin B6 metabolism	1	0.333333	1	Meta	4-Pyridoxic acid
Vitamin B6 metabolism	0.838071	0.284211	27	Tran	Cluster-60005.45776|Cluster-60005.124968|Cluster-60005.79192|Cluster-55302.0|Cluster-60005.84066|Cluster-60005.81848|Cluster-5809.0|Cluster-60005.44769|Cluster-60005.60724|Cluster-60005.60072|Cluster-60005.97092|Cluster-60005.97093|Cluster-60005.72181|Cluster-60005.17635|Cluster-60005.58851|Cluster-40550.0|Cluster-81247.0|Cluster-60005.81181|Cluster-69590.0|Cluster-60005.44585|Cluster-60005.56458…
Sulfur metabolism	1	0.333333	1	Meta	Taurine
Sulfur metabolism	0.593584	0.336879	95	Tran	Cluster-25900.0|Cluster-60005.52009|Cluster-60005.57493|Cluster-60005.66360|Cluster-60005.115745|Cluster-6640.0|Cluster-60005.33193|Cluster-60005.48189|Cluster-60005.41816|Cluster-60005.33194|Cluster-60005.27618|Cluster-60005.34989|Cluster-60005.37098|Cluster-60005.37099|Cluster-60005.64178|Cluster-60005.39462|Cluster-60005.47925|Cluster-60005.65060|Cluster-60005.69211|Cluster-60005.121252|Cluste…
Isoquinoline alkaloid biosynthesis	1	0.333333	1	Meta	L-Dopa
Isoquinoline alkaloid biosynthesis	0.750729	0.307692	36	Tran	Cluster-60005.108033|Cluster-60005.29506|Cluster-28211.0|Cluster-60005.11724|Cluster-60005.62863|Cluster-60005.58954|Cluster-60005.89656|Cluster-60005.54722|Cluster-60005.95749|Cluster-6041.0|Cluster-60005.25229|Cluster-60005.53919|Cluster-60005.112281|Cluster-60005.71771|Cluster-60005.71442|Cluster-60005.25277|Cluster-60005.103449|Cluster-47330.0|Cluster-60005.69869|Cluster-27493.0|Cluster-60005…
