# Supplementary material for: Combined Transcriptome and Metabolome Analysis of a New Species of Microalgae from the Tibetan Plateau and Its Response to Sewage Treatment
Source: MDPI journal article supplement (doi:10.3390/w14213391), 2022-10-26
Supplement: s1 [file s1 › Table S5.xlt]

## Sheet: YH_3vsYH_2.all_KEGGenrich
Category	ID	Description	GeneRatio	BgRatio	pvalue	padj	Count	geneID
KEGG	ko03010	Ribosome	987|13055	2153|37029	4.80204e-14	1.68552e-11	987	Cluster-60005.31425|Cluster-60005.43889|Cluster-58287.0|Cluster-60005.18362|Cluster-60005.96475|Cluster-60005.66569|Cluster-59080.0|Cluster-60005.51446|Cluster-60005.57300|Cluster-60005.94906|Cluster-60005.42735|Cluster-60005.51190|Cluster-33189.0|Cluster-60005.62963|Cluster-60005.62968|Cluster-60005.69653|Cluster-60005.61390|Cluster-60005.14656|Cluster-60005.76831|Cluster-58592.0|Cluster-60005.5…
KEGG	ko00196	Photosynthesis - antenna proteins	100|13055	155|37029	1.27899e-06	0.000224463	100	Cluster-60005.43317|Cluster-60005.70982|Cluster-60005.82116|Cluster-60005.50737|Cluster-60005.50204|Cluster-60005.51767|Cluster-60005.47920|Cluster-60005.47753|Cluster-60005.47457|Cluster-60005.73039|Cluster-60005.48348|Cluster-60005.57091|Cluster-60005.53445|Cluster-60005.56250|Cluster-60005.38598|Cluster-60005.62174|Cluster-60005.26460|Cluster-60005.65755|Cluster-60005.78866|Cluster-60005.27049…
KEGG	ko00195	Photosynthesis	166|13055	345|37029	0.000294289	0.0344318	166	Cluster-60005.51841|Cluster-60005.58059|Cluster-60005.29204|Cluster-60005.44607|Cluster-60005.27627|Cluster-60005.63167|Cluster-63999.0|Cluster-60005.44726|Cluster-60005.50634|Cluster-60005.65270|Cluster-60005.49758|Cluster-60005.48818|Cluster-60005.52961|Cluster-60005.65382|Cluster-60005.93122|Cluster-60005.55278|Cluster-60005.40615|Cluster-60005.6730|Cluster-60005.96831|Cluster-60005.58542|Clus…
KEGG	ko04120	Ubiquitin mediated proteolysis	470|13055	1136|37029	0.000461422	0.0404898	470	Cluster-60005.43490|Cluster-60005.51195|Cluster-60005.79203|Cluster-58021.0|Cluster-60005.64149|Cluster-60005.62743|Cluster-50813.0|Cluster-60005.43954|Cluster-7324.0|Cluster-60005.87609|Cluster-60005.49613|Cluster-60005.86068|Cluster-60005.59218|Cluster-60005.18245|Cluster-6195.0|Cluster-60005.54587|Cluster-60005.41215|Cluster-60005.34298|Cluster-60005.97716|Cluster-60005.102990|Cluster-60005.64…
KEGG	ko00190	Oxidative phosphorylation	496|13055	1213|37029	0.000698112	0.0490075	496	Cluster-60005.44600|Cluster-60005.84166|Cluster-60005.3014|Cluster-60005.90158|Cluster-60005.90652|Cluster-60005.35770|Cluster-60005.79302|Cluster-60005.36180|Cluster-60005.42635|Cluster-60005.61935|Cluster-60005.119844|Cluster-60005.93520|Cluster-60005.33756|Cluster-60005.24122|Cluster-60005.88396|Cluster-60005.33759|Cluster-60005.116789|Cluster-60005.33888|Cluster-60005.62362|Cluster-10114.0|Cl…
KEGG	ko00860	Porphyrin and chlorophyll metabolism	231|13055	522|37029	0.000965457	0.0564792	231	Cluster-60005.99989|Cluster-60005.11649|Cluster-23963.0|Cluster-60005.45100|Cluster-60005.56019|Cluster-60005.67163|Cluster-60005.88098|Cluster-60005.57150|Cluster-60005.30288|Cluster-60005.45099|Cluster-60005.41617|Cluster-60005.61159|Cluster-60005.91542|Cluster-60005.86052|Cluster-60005.99685|Cluster-60005.47522|Cluster-60005.93520|Cluster-60005.48587|Cluster-60005.67031|Cluster-60005.84873|Clu…
KEGG	ko05012	Parkinson's disease	391|13055	953|37029	0.00199844	0.100208	391	Cluster-60005.43493|Cluster-60005.3014|Cluster-60005.90158|Cluster-60005.42088|Cluster-60005.79302|Cluster-60005.66360|Cluster-60005.119844|Cluster-60005.43954|Cluster-60005.33756|Cluster-60005.24122|Cluster-60005.33759|Cluster-60005.49613|Cluster-60005.18245|Cluster-60005.33888|Cluster-60005.62362|Cluster-10114.0|Cluster-60005.41212|Cluster-60005.77639|Cluster-60005.49768|Cluster-60005.60015|Clu…
KEGG	ko05130	Pathogenic Escherichia coli infection	78|13055	156|37029	0.00506339	0.204743	78	Cluster-7898.0|Cluster-60005.114654|Cluster-53567.1|Cluster-60005.69344|Cluster-60005.61896|Cluster-82815.0|Cluster-60005.89439|Cluster-60005.62702|Cluster-60005.11640|Cluster-60005.83828|Cluster-60005.94519|Cluster-60005.48956|Cluster-35236.0|Cluster-60005.97031|Cluster-60005.51089|Cluster-72523.0|Cluster-30816.1|Cluster-60005.84731|Cluster-60005.49203|Cluster-52991.0|Cluster-60005.87878|Cluster…
KEGG	ko03050	Proteasome	256|13055	612|37029	0.00524982	0.204743	256	Cluster-60005.87838|Cluster-60005.92232|Cluster-60005.95114|Cluster-60005.85523|Cluster-60005.120729|Cluster-60005.107707|Cluster-60005.63245|Cluster-60005.16351|Cluster-60005.60923|Cluster-60005.78011|Cluster-60005.44724|Cluster-12191.0|Cluster-60005.48176|Cluster-60005.104066|Cluster-49465.0|Cluster-60005.43792|Cluster-60005.27027|Cluster-60005.91262|Cluster-60005.101526|Cluster-60005.62565|Clu…
KEGG	ko05010	Alzheimer's disease	420|13055	1057|37029	0.00708221	0.248585	420	Cluster-60005.43493|Cluster-60005.3014|Cluster-60005.29948|Cluster-60005.90158|Cluster-60005.69794|Cluster-60005.79302|Cluster-60005.66360|Cluster-28842.0|Cluster-60005.34188|Cluster-60005.34590|Cluster-60005.119844|Cluster-60005.122746|Cluster-66359.0|Cluster-60005.33756|Cluster-60005.24122|Cluster-60005.99666|Cluster-43849.0|Cluster-53067.0|Cluster-60005.73367|Cluster-60005.33888|Cluster-60005.…
KEGG	ko04932	Non-alcoholic fatty liver disease (NAFLD)	358|13055	893|37029	0.00831749	0.265403	358	Cluster-60005.43493|Cluster-60005.3014|Cluster-60005.90158|Cluster-60005.59816|Cluster-60005.66360|Cluster-28842.0|Cluster-60005.46725|Cluster-60005.119844|Cluster-60005.33756|Cluster-60005.24122|Cluster-60005.33759|Cluster-60005.58788|Cluster-60005.33888|Cluster-60005.62362|Cluster-10114.0|Cluster-60005.41212|Cluster-60005.61164|Cluster-60005.61166|Cluster-60005.77639|Cluster-60005.66858|Cluster…
KEGG	ko04142	Lysosome	317|13055	796|37029	0.01572	0.433158	317	Cluster-60005.41751|Cluster-60005.106763|Cluster-60005.44605|Cluster-60005.24393|Cluster-60005.85727|Cluster-60005.16630|Cluster-60005.43550|Cluster-60005.81886|Cluster-60005.1870|Cluster-60005.90652|Cluster-60005.17976|Cluster-60005.17975|Cluster-60005.74667|Cluster-60005.86112|Cluster-60005.51581|Cluster-60005.27541|Cluster-60005.61935|Cluster-60005.79261|Cluster-60005.83478|Cluster-60005.48061…
KEGG	ko05110	Vibrio cholerae infection	185|13055	443|37029	0.0160429	0.433158	185	Cluster-60005.44600|Cluster-60005.84166|Cluster-60005.88314|Cluster-60005.75384|Cluster-60005.47108|Cluster-60005.90652|Cluster-60005.41308|Cluster-60005.10389|Cluster-7069.0|Cluster-60005.4500|Cluster-60005.61935|Cluster-7779.0|Cluster-60005.39199|Cluster-60005.57820|Cluster-60005.30152|Cluster-24585.0|Cluster-60005.47759|Cluster-60005.102310|Cluster-6567.0|Cluster-60005.76691|Cluster-60005.5681…
KEGG	ko04145	Phagosome	284|13055	714|37029	0.0219522	0.536521	284	Cluster-60005.99308|Cluster-60005.44600|Cluster-60005.84166|Cluster-60005.88314|Cluster-60005.59476|Cluster-60005.59182|Cluster-60005.75385|Cluster-60005.47108|Cluster-60005.52848|Cluster-60005.90652|Cluster-60005.84439|Cluster-53567.1|Cluster-60005.36030|Cluster-60005.10389|Cluster-7069.0|Cluster-60005.26275|Cluster-60005.56885|Cluster-60005.61935|Cluster-60005.22786|Cluster-7779.0|Cluster-60005…
KEGG	ko04721	Synaptic vesicle cycle	206|13055	505|37029	0.0229283	0.536521	206	Cluster-60005.44600|Cluster-60005.84166|Cluster-60005.88314|Cluster-60005.43550|Cluster-60005.90652|Cluster-60005.67369|Cluster-60005.62581|Cluster-60005.10389|Cluster-7069.0|Cluster-60005.49135|Cluster-60005.4500|Cluster-60005.61935|Cluster-60005.122628|Cluster-60005.48061|Cluster-60005.86781|Cluster-60005.9472|Cluster-60005.30152|Cluster-60005.49448|Cluster-60005.18646|Cluster-60005.47759|Clust…
KEGG	ko05132	Salmonella infection	122|13055	286|37029	0.0281778	0.594238	122	Cluster-60005.69344|Cluster-60005.75385|Cluster-60005.11640|Cluster-60005.83828|Cluster-60005.34188|Cluster-60005.87343|Cluster-60005.93448|Cluster-60005.75256|Cluster-44001.0|Cluster-5433.0|Cluster-60005.87738|Cluster-60005.120527|Cluster-51044.0|Cluster-60005.94914|Cluster-60005.4860|Cluster-7043.0|Cluster-60005.103576|Cluster-60005.74652|Cluster-60005.66858|Cluster-60005.81678|Cluster-60005.12…
KEGG	ko05131	Shigellosis	110|13055	255|37029	0.0287808	0.594238	110	Cluster-60005.65669|Cluster-60005.69344|Cluster-60005.11640|Cluster-60005.83828|Cluster-60005.34188|Cluster-60005.87343|Cluster-60005.93448|Cluster-44001.0|Cluster-5433.0|Cluster-70340.0|Cluster-60005.87738|Cluster-60005.99909|Cluster-60005.120527|Cluster-51044.0|Cluster-60005.94914|Cluster-60005.4860|Cluster-7043.0|Cluster-60005.74652|Cluster-60005.87948|Cluster-60005.66858|Cluster-60005.81678|C…
KEGG	ko05100	Bacterial invasion of epithelial cells	109|13055	256|37029	0.0373198	0.727736	109	Cluster-60005.69344|Cluster-60005.43550|Cluster-60005.11640|Cluster-60005.83828|Cluster-60005.122628|Cluster-60005.87343|Cluster-60005.93448|Cluster-44001.0|Cluster-5433.0|Cluster-60005.66844|Cluster-60005.87738|Cluster-60005.120527|Cluster-51044.0|Cluster-60005.29239|Cluster-60005.4860|Cluster-60005.16867|Cluster-60005.87948|Cluster-60005.66858|Cluster-60005.81678|Cluster-60005.105363|Cluster-60…
KEGG	ko00253	Tetracycline biosynthesis	26|13055	48|37029	0.0438941	0.749491	26	Cluster-60005.51922|Cluster-60005.66052|Cluster-60005.37798|Cluster-60005.58170|Cluster-60005.59607|Cluster-60005.40078|Cluster-60005.72034|Cluster-60005.51428|Cluster-60005.99647|Cluster-60005.49293|Cluster-60005.49772|Cluster-60005.85845|Cluster-60005.72893|Cluster-60005.17299|Cluster-60005.67235|Cluster-60005.67234|Cluster-60005.14523|Cluster-60005.43206|Cluster-60005.49094|Cluster-60005.55965…
KEGG	ko04260	Cardiac muscle contraction	87|13055	201|37029	0.0444492	0.749491	87	Cluster-60005.51356|Cluster-60005.3014|Cluster-60005.82593|Cluster-60005.106486|Cluster-60005.115744|Cluster-60005.119844|Cluster-60005.102783|Cluster-63422.0|Cluster-60005.25228|Cluster-60005.62362|Cluster-3058.0|Cluster-60005.55749|Cluster-60005.77639|Cluster-60005.35472|Cluster-60005.6799|Cluster-60005.60959|Cluster-60005.49768|Cluster-60005.28289|Cluster-60005.47330|Cluster-60005.99679|Cluste…
KEGG	ko02020	Two-component system	83|13055	191|37029	0.0457843	0.749491	83	Cluster-60005.106879|Cluster-60005.51356|Cluster-60005.3014|Cluster-60005.66360|Cluster-60005.5942|Cluster-60005.70728|Cluster-60005.16548|Cluster-60005.42612|Cluster-60005.42613|Cluster-69577.0|Cluster-60005.80031|Cluster-60005.91037|Cluster-60005.77168|Cluster-60005.50910|Cluster-60005.52031|Cluster-60005.52114|Cluster-33302.0|Cluster-60005.112981|Cluster-60005.38669|Cluster-60005.49768|Cluster…
KEGG	ko05120	Epithelial cell signaling in Helicobacter pylori infection	160|13055	396|37029	0.0493366	0.749491	160	Cluster-60005.44600|Cluster-60005.84166|Cluster-60005.88314|Cluster-60005.90652|Cluster-60005.10389|Cluster-7069.0|Cluster-60005.4500|Cluster-60005.61935|Cluster-60005.48061|Cluster-60005.30152|Cluster-6541.0|Cluster-60005.49448|Cluster-44001.0|Cluster-60005.47759|Cluster-60005.102310|Cluster-60005.76691|Cluster-60005.56810|Cluster-60005.87738|Cluster-60005.100101|Cluster-60005.30723|Cluster-6000…
KEGG	ko05032	Morphine addiction	41|13055	86|37029	0.0550735	0.749491	41	Cluster-60005.28271|Cluster-60005.84778|Cluster-60005.66392|Cluster-60005.109973|Cluster-60005.69833|Cluster-80756.0|Cluster-60005.79196|Cluster-60005.52508|Cluster-60005.66361|Cluster-60005.51660|Cluster-60005.99209|Cluster-60005.111129|Cluster-60005.47551|Cluster-60005.28734|Cluster-60005.107080|Cluster-60005.116673|Cluster-60005.89081|Cluster-57386.0|Cluster-27795.0|Cluster-60005.53893|Cluster…
KEGG	ko04144	Endocytosis	500|13055	1336|37029	0.0579438	0.749491	500	Cluster-60005.44939|Cluster-60005.11555|Cluster-60005.43550|Cluster-60005.42737|Cluster-60005.43556|Cluster-60005.42632|Cluster-60005.14308|Cluster-60005.69344|Cluster-60005.49238|Cluster-60005.87343|Cluster-60005.93448|Cluster-60005.98360|Cluster-60005.18248|Cluster-49352.0|Cluster-60005.85847|Cluster-60005.120527|Cluster-60005.66316|Cluster-60005.72222|Cluster-8273.1|Cluster-8273.0|Cluster-3608…
KEGG	ko00640	Propanoate metabolism	174|13055	437|37029	0.0582847	0.749491	174	Cluster-25745.0|Cluster-60005.120013|Cluster-60005.92478|Cluster-60005.68706|Cluster-60005.18368|Cluster-53665.0|Cluster-60005.75651|Cluster-60005.31700|Cluster-60005.51922|Cluster-60005.53438|Cluster-60005.70810|Cluster-60005.69412|Cluster-60005.47326|Cluster-60005.49293|Cluster-60005.77769|Cluster-55902.0|Cluster-65736.0|Cluster-60005.98851|Cluster-5815.0|Cluster-60005.70728|Cluster-60005.17299…
KEGG	ko04022	cGMP-PKG signaling pathway	168|13055	421|37029	0.0589361	0.749491	168	Cluster-60005.95149|Cluster-60005.50732|Cluster-75025.0|Cluster-60005.72439|Cluster-60005.69794|Cluster-5125.0|Cluster-60005.49895|Cluster-60005.52579|Cluster-60005.56156|Cluster-81346.0|Cluster-60005.34059|Cluster-60005.34188|Cluster-60005.34590|Cluster-60005.122746|Cluster-66359.0|Cluster-60005.105244|Cluster-60005.99666|Cluster-60005.4110|Cluster-60005.73937|Cluster-60005.73936|Cluster-60005.3…
KEGG	ko04810	Regulation of actin cytoskeleton	164|13055	411|37029	0.0613728	0.749491	164	Cluster-60005.69344|Cluster-60005.11640|Cluster-60005.83828|Cluster-60005.49895|Cluster-60005.34059|Cluster-60005.15941|Cluster-60005.53228|Cluster-60005.79674|Cluster-60005.87343|Cluster-60005.93448|Cluster-44001.0|Cluster-5433.0|Cluster-60005.102046|Cluster-60005.87738|Cluster-60005.79966|Cluster-60005.100538|Cluster-60005.120527|Cluster-51044.0|Cluster-60005.38366|Cluster-60005.115651|Cluster-…
KEGG	ko04966	Collecting duct acid secretion	102|13055	245|37029	0.061643	0.749491	102	Cluster-60005.44600|Cluster-60005.84166|Cluster-60005.90652|Cluster-60005.10389|Cluster-7069.0|Cluster-60005.51254|Cluster-60005.61935|Cluster-60005.48061|Cluster-60005.30152|Cluster-60005.49448|Cluster-60005.47759|Cluster-60005.102310|Cluster-60005.76691|Cluster-60005.56810|Cluster-60005.30723|Cluster-60005.91948|Cluster-17486.0|Cluster-60005.13536|Cluster-60005.82935|Cluster-60005.26275|Cluster…
KEGG	ko00630	Glyoxylate and dicarboxylate metabolism	278|13055	724|37029	0.0656355	0.749491	278	Cluster-60005.41181|Cluster-25745.0|Cluster-60005.117176|Cluster-24534.0|Cluster-60005.50200|Cluster-60005.67770|Cluster-60005.56012|Cluster-60005.43255|Cluster-60005.75651|Cluster-60005.30259|Cluster-60005.38214|Cluster-60005.38740|Cluster-60005.31700|Cluster-60005.14518|Cluster-60005.101599|Cluster-60005.42591|Cluster-60005.84737|Cluster-60005.77626|Cluster-60005.79164|Cluster-60005.119306|Clus…
KEGG	ko05323	Rheumatoid arthritis	136|13055	337|37029	0.0663054	0.749491	136	Cluster-60005.44600|Cluster-60005.84166|Cluster-60005.88314|Cluster-60005.59182|Cluster-60005.90652|Cluster-60005.99646|Cluster-60005.10389|Cluster-7069.0|Cluster-60005.4500|Cluster-60005.61935|Cluster-60005.48061|Cluster-60005.30152|Cluster-60005.49448|Cluster-60005.47759|Cluster-60005.102310|Cluster-60005.76691|Cluster-60005.56810|Cluster-60005.100101|Cluster-60005.61491|Cluster-60005.30723|Clu…
KEGG	ko05222	Small cell lung cancer	51|13055	113|37029	0.0663945	0.749491	51	Cluster-60005.93029|Cluster-60005.38975|Cluster-60005.37937|Cluster-9815.0|Cluster-60005.16548|Cluster-60005.16854|Cluster-36992.0|Cluster-60005.74335|Cluster-60005.66360|Cluster-7868.0|Cluster-60005.85425|Cluster-60005.14328|Cluster-60005.60558|Cluster-29607.0|Cluster-66574.0|Cluster-60005.4784|Cluster-78061.0|Cluster-60005.50347|Cluster-60005.80554|Cluster-60005.33304|Cluster-4831.0|Cluster-600…
KEGG	ko05203	Viral carcinogenesis	373|13055	988|37029	0.0683296	0.749491	373	Cluster-60005.61833|Cluster-43189.0|Cluster-60005.37937|Cluster-60005.34188|Cluster-60005.37984|Cluster-60005.37985|Cluster-60005.91411|Cluster-60005.89305|Cluster-60005.56541|Cluster-60005.18718|Cluster-60005.17441|Cluster-60005.38366|Cluster-60005.45222|Cluster-60005.52249|Cluster-60005.30405|Cluster-60005.66858|Cluster-60005.107303|Cluster-5608.1|Cluster-60005.35213|Cluster-60005.74019|Cluster…
KEGG	ko04020	Calcium signaling pathway	134|13055	333|37029	0.0714383	0.759843	134	Cluster-60005.95149|Cluster-60005.50732|Cluster-75025.0|Cluster-60005.105244|Cluster-60005.69794|Cluster-60005.114963|Cluster-68747.0|Cluster-60005.52579|Cluster-60005.56156|Cluster-81346.0|Cluster-60005.77923|Cluster-60005.34590|Cluster-60005.122746|Cluster-66359.0|Cluster-60005.99666|Cluster-60005.4110|Cluster-60005.32476|Cluster-11987.0|Cluster-60005.55680|Cluster-60005.45821|Cluster-78564.0|C…
KEGG	ko04214	Apoptosis - fly	127|13055	315|37029	0.0747533	0.771718	127	Cluster-58364.0|Cluster-60005.60396|Cluster-60005.70984|Cluster-60005.3252|Cluster-60005.85520|Cluster-58021.0|Cluster-60005.114059|Cluster-4735.1|Cluster-60005.66360|Cluster-60005.34188|Cluster-60005.28835|Cluster-62590.0|Cluster-32526.0|Cluster-60005.59350|Cluster-3240.0|Cluster-60005.42837|Cluster-60005.73361|Cluster-60005.98920|Cluster-60005.40546|Cluster-60005.20363|Cluster-62150.0|Cluster-7…
KEGG	ko00565	Ether lipid metabolism	69|13055	162|37029	0.0812514	0.814835	69	Cluster-60005.23295|Cluster-60005.111920|Cluster-60005.42188|Cluster-60005.42189|Cluster-60005.75944|Cluster-60005.68600|Cluster-60005.42342|Cluster-62544.0|Cluster-79639.0|Cluster-60005.75673|Cluster-60005.42737|Cluster-60005.111869|Cluster-60005.47106|Cluster-60005.297|Cluster-60005.76950|Cluster-81886.0|Cluster-60005.124461|Cluster-64519.0|Cluster-60005.42022|Cluster-60005.63472|Cluster-60005.…
KEGG	ko04713	Circadian entrainment	83|13055	200|37029	0.0875449	0.853562	83	Cluster-26286.1|Cluster-5125.0|Cluster-75025.0|Cluster-60005.91739|Cluster-60005.45078|Cluster-60005.72439|Cluster-60005.109973|Cluster-60005.4110|Cluster-60005.69833|Cluster-60005.112399|Cluster-68747.0|Cluster-60005.39766|Cluster-60005.99666|Cluster-81346.0|Cluster-60005.79196|Cluster-60005.72415|Cluster-60005.66361|Cluster-60005.34188|Cluster-60005.18014|Cluster-60005.58588|Cluster-66359.0|Clu…
KEGG	ko04014	Ras signaling pathway	130|13055	329|37029	0.101523	0.938208	130	Cluster-60005.111869|Cluster-60005.109973|Cluster-60005.42737|Cluster-68747.0|Cluster-81346.0|Cluster-60005.66361|Cluster-60005.34188|Cluster-60005.16233|Cluster-66359.0|Cluster-44001.0|Cluster-60005.99666|Cluster-60005.4110|Cluster-60005.32476|Cluster-60005.55680|Cluster-60005.87738|Cluster-64417.0|Cluster-60005.45821|Cluster-78564.0|Cluster-60005.4860|Cluster-7043.0|Cluster-60005.99209|Cluster-…
KEGG	ko04080	Neuroactive ligand-receptor interaction	14|13055	25|37029	0.101572	0.938208	14	Cluster-60005.51013|Cluster-60005.110044|Cluster-60005.92241|Cluster-60005.65937|Cluster-78659.0|Cluster-60005.13368|Cluster-60005.110636|Cluster-60005.90741|Cluster-60005.45360|Cluster-60005.2514|Cluster-62398.0|Cluster-60005.73361|Cluster-60005.114059|Cluster-60005.35520
KEGG	ko03008	Ribosome biogenesis in eukaryotes	421|13055	1137|37029	0.105435	0.943757	421	Cluster-60005.26985|Cluster-60005.44214|Cluster-60005.42633|Cluster-60005.110358|Cluster-60005.62742|Cluster-60005.47804|Cluster-60005.46335|Cluster-60005.20893|Cluster-60005.99667|Cluster-8039.0|Cluster-60005.47684|Cluster-60005.7557|Cluster-65374.0|Cluster-60005.55448|Cluster-60005.55567|Cluster-60005.14256|Cluster-60005.18716|Cluster-60005.61943|Cluster-6821.2|Cluster-60005.62360|Cluster-60005…
KEGG	ko04724	Glutamatergic synapse	72|13055	175|37029	0.115814	0.943757	72	Cluster-60005.95149|Cluster-60005.111869|Cluster-60005.90399|Cluster-60005.94929|Cluster-60005.42189|Cluster-60005.75944|Cluster-60005.109973|Cluster-60005.42508|Cluster-60005.26651|Cluster-60005.69833|Cluster-60005.297|Cluster-8810.0|Cluster-60005.102479|Cluster-60005.91037|Cluster-60005.20219|Cluster-60005.66361|Cluster-60005.34188|Cluster-60005.52114|Cluster-60005.18014|Cluster-60005.30163|Clu…
KEGG	ko04150	mTOR signaling pathway	269|13055	716|37029	0.117901	0.943757	269	Cluster-60005.24449|Cluster-60005.84166|Cluster-67839.0|Cluster-60005.62068|Cluster-60005.44600|Cluster-60005.56934|Cluster-44143.0|Cluster-60005.56263|Cluster-60005.63691|Cluster-43025.0|Cluster-4824.0|Cluster-77991.0|Cluster-60005.27546|Cluster-60005.77535|Cluster-7069.0|Cluster-60005.26275|Cluster-28842.0|Cluster-60005.34188|Cluster-60005.64415|Cluster-60005.64413|Cluster-60005.104047|Cluster-…
KEGG	ko04140	Regulation of autophagy	137|13055	352|37029	0.122132	0.943757	137	Cluster-60005.65669|Cluster-44143.0|Cluster-60005.65225|Cluster-60005.35199|Cluster-60005.31622|Cluster-60005.21675|Cluster-60005.21674|Cluster-60005.59816|Cluster-60005.104465|Cluster-60005.45330|Cluster-60005.26057|Cluster-60005.31010|Cluster-60005.54404|Cluster-60005.35518|Cluster-16586.0|Cluster-38854.0|Cluster-60005.28372|Cluster-60005.50128|Cluster-60005.83613|Cluster-60005.74401|Cluster-60…
KEGG	ko04740	Olfactory transduction	78|13055	192|37029	0.122976	0.943757	78	Cluster-26286.1|Cluster-5125.0|Cluster-75025.0|Cluster-60005.91739|Cluster-60005.109973|Cluster-60005.4110|Cluster-60005.69833|Cluster-60005.112399|Cluster-80756.0|Cluster-60005.39766|Cluster-60005.99666|Cluster-81346.0|Cluster-60005.79196|Cluster-60005.72415|Cluster-80518.0|Cluster-60005.66361|Cluster-60005.18014|Cluster-60005.58588|Cluster-66359.0|Cluster-54475.0|Cluster-60005.111129|Cluster-60…
KEGG	ko04068	FoxO signaling pathway	205|13055	541|37029	0.129833	0.943757	205	Cluster-60005.76716|Cluster-60005.47859|Cluster-60005.105002|Cluster-44143.0|Cluster-76802.0|Cluster-60005.31622|Cluster-60005.69962|Cluster-60005.59816|Cluster-60005.101597|Cluster-60005.37937|Cluster-60005.52250|Cluster-60005.21776|Cluster-60005.21777|Cluster-60005.102554|Cluster-25001.0|Cluster-60005.101549|Cluster-60005.60558|Cluster-60005.104047|Cluster-60005.71385|Cluster-60005.124640|Clust…
KEGG	ko04013	MAPK signaling pathway - fly	148|13055	384|37029	0.132219	0.943757	148	Cluster-60005.30711|Cluster-60005.95436|Cluster-60005.47859|Cluster-59244.0|Cluster-6821.2|Cluster-60005.58703|Cluster-6821.1|Cluster-60005.101597|Cluster-60005.34188|Cluster-60005.102554|Cluster-25001.0|Cluster-60005.124640|Cluster-44001.0|Cluster-60005.8472|Cluster-60005.64797|Cluster-60005.87738|Cluster-60005.35590|Cluster-60005.94914|Cluster-60005.42550|Cluster-60005.4860|Cluster-7043.0|Clust…
KEGG	ko05034	Alcoholism	171|13055	448|37029	0.135386	0.943757	171	Cluster-60005.51512|Cluster-78429.0|Cluster-60005.109973|Cluster-5125.0|Cluster-60005.49895|Cluster-60005.13430|Cluster-60005.11895|Cluster-60005.34059|Cluster-60005.66361|Cluster-60005.34188|Cluster-60005.53488|Cluster-56766.0|Cluster-60005.104386|Cluster-66359.0|Cluster-60005.54674|Cluster-60005.33119|Cluster-60005.33118|Cluster-43849.0|Cluster-60005.51683|Cluster-60005.32476|Cluster-60005.7025…
KEGG	ko00900	Terpenoid backbone biosynthesis	128|13055	330|37029	0.137715	0.943757	128	Cluster-60005.30490|Cluster-60005.45100|Cluster-60005.108242|Cluster-60005.16967|Cluster-60005.41610|Cluster-60005.75651|Cluster-60005.49169|Cluster-60005.39612|Cluster-60005.82196|Cluster-60005.65276|Cluster-60005.5182|Cluster-62121.0|Cluster-60005.99901|Cluster-60005.45699|Cluster-60005.18557|Cluster-60005.67282|Cluster-60005.46535|Cluster-60005.123968|Cluster-60005.70728|Cluster-60005.81374|Cl…
KEGG	ko04961	Endocrine and other factor-regulated calcium reabsorption	86|13055	216|37029	0.141603	0.943757	86	Cluster-60005.43550|Cluster-60005.49135|Cluster-60005.44868|Cluster-60005.122628|Cluster-60005.9472|Cluster-60005.18646|Cluster-60005.66844|Cluster-60005.55749|Cluster-60005.60959|Cluster-60005.28289|Cluster-41174.0|Cluster-60005.92501|Cluster-8263.0|Cluster-60005.105796|Cluster-60005.105797|Cluster-60005.99679|Cluster-60005.19271|Cluster-28508.0|Cluster-60005.95425|Cluster-60005.26570|Cluster-60…
KEGG	ko04744	Phototransduction	45|13055	107|37029	0.150621	0.943757	45	Cluster-5125.0|Cluster-60005.99666|Cluster-60005.109973|Cluster-43849.0|Cluster-60005.69833|Cluster-60005.112399|Cluster-68747.0|Cluster-60005.39766|Cluster-81346.0|Cluster-60005.66361|Cluster-60005.18014|Cluster-66359.0|Cluster-60005.111129|Cluster-60005.40968|Cluster-66452.0|Cluster-60005.21513|Cluster-75025.0|Cluster-60005.4110|Cluster-60005.71157|Cluster-60005.32476|Cluster-60005.76997|Cluste…
KEGG	ko04215	Apoptosis - multiple species	25|13055	55|37029	0.152394	0.943757	25	Cluster-60005.68726|Cluster-60005.70984|Cluster-60005.16548|Cluster-58021.0|Cluster-60005.66360|Cluster-60005.29138|Cluster-60005.2855|Cluster-60005.69433|Cluster-60005.31010|Cluster-66574.0|Cluster-60005.4784|Cluster-60005.39318|Cluster-60005.102962|Cluster-29607.0|Cluster-60005.33304|Cluster-60005.20452|Cluster-60005.96504|Cluster-60005.51613|Cluster-60005.106093|Cluster-62150.0|Cluster-60005.8…
KEGG	ko00710	Carbon fixation in photosynthetic organisms	242|13055	649|37029	0.153272	0.943757	242	Cluster-60005.96343|Cluster-60005.74944|Cluster-60005.45103|Cluster-60005.43766|Cluster-60005.53020|Cluster-60005.64543|Cluster-60005.78012|Cluster-60005.43255|Cluster-60005.45233|Cluster-60005.50796|Cluster-60005.57107|Cluster-60005.46724|Cluster-60005.44683|Cluster-60005.104460|Cluster-60005.110691|Cluster-60005.74386|Cluster-60005.46024|Cluster-60005.48581|Cluster-60005.50846|Cluster-60005.694…
KEGG	ko04910	Insulin signaling pathway	281|13055	759|37029	0.156993	0.943757	281	Cluster-60005.60801|Cluster-60005.74581|Cluster-43025.0|Cluster-67839.0|Cluster-60005.49686|Cluster-44143.0|Cluster-60005.63691|Cluster-5125.0|Cluster-60005.49895|Cluster-60005.51604|Cluster-77991.0|Cluster-81346.0|Cluster-60005.79196|Cluster-60005.77535|Cluster-60005.25839|Cluster-60005.34059|Cluster-60005.40053|Cluster-28842.0|Cluster-60005.52250|Cluster-60005.64415|Cluster-60005.64413|Cluster-…
KEGG	ko00430	Taurine and hypotaurine metabolism	28|13055	63|37029	0.157041	0.943757	28	Cluster-64110.0|Cluster-60005.18345|Cluster-60005.78169|Cluster-60467.0|Cluster-60005.61753|Cluster-60005.84428|Cluster-3284.0|Cluster-60005.98263|Cluster-60005.96878|Cluster-59791.0|Cluster-60005.84577|Cluster-60005.58467|Cluster-60005.28691|Cluster-60005.46478|Cluster-13736.0|Cluster-60005.4612|Cluster-60005.29387|Cluster-60005.39688|Cluster-60005.53401|Cluster-60005.24806|Cluster-60005.60119|C…
KEGG	ko04540	Gap junction	67|13055	167|37029	0.162615	0.943757	67	Cluster-26286.1|Cluster-60005.84100|Cluster-60005.79196|Cluster-60005.91739|Cluster-60005.72439|Cluster-60005.61896|Cluster-60005.71192|Cluster-60005.40546|Cluster-60005.86700|Cluster-60005.65319|Cluster-60005.58587|Cluster-53567.1|Cluster-60005.72415|Cluster-30816.1|Cluster-60005.34188|Cluster-60005.58588|Cluster-60005.91691|Cluster-60005.70177|Cluster-60005.14669|Cluster-60005.73937|Cluster-600…
KEGG	ko04725	Cholinergic synapse	27|13055	62|37029	0.183234	0.943757	27	Cluster-60005.84100|Cluster-60005.79196|Cluster-60005.109973|Cluster-60005.69833|Cluster-60005.66361|Cluster-60005.34188|Cluster-71412.0|Cluster-60005.111129|Cluster-60005.91691|Cluster-60005.70177|Cluster-57386.0|Cluster-27795.0|Cluster-60005.18014|Cluster-60005.45132|Cluster-52298.0|Cluster-60005.40546|Cluster-60005.45078|Cluster-60005.72716|Cluster-60005.42031|Cluster-60005.99209|Cluster-60005…
KEGG	ko04666	Fc gamma R-mediated phagocytosis	142|13055	376|37029	0.186564	0.943757	142	Cluster-43025.0|Cluster-60005.69344|Cluster-60005.11640|Cluster-60005.83828|Cluster-60005.111869|Cluster-77991.0|Cluster-60005.15941|Cluster-60005.53228|Cluster-60005.87343|Cluster-60005.93448|Cluster-44001.0|Cluster-5433.0|Cluster-60005.122021|Cluster-60005.102046|Cluster-60005.87738|Cluster-60005.79966|Cluster-60005.100538|Cluster-60005.120527|Cluster-51044.0|Cluster-60005.38366|Cluster-60005.4…
KEGG	ko00830	Retinol metabolism	42|13055	102|37029	0.188181	0.943757	42	Cluster-60005.52843|Cluster-60005.43435|Cluster-60005.66008|Cluster-60005.98428|Cluster-60005.67939|Cluster-60005.54625|Cluster-60005.122169|Cluster-60005.49521|Cluster-60005.69254|Cluster-60005.108815|Cluster-60005.98570|Cluster-60005.10502|Cluster-60005.98205|Cluster-60005.95870|Cluster-43869.0|Cluster-60005.90821|Cluster-60005.40767|Cluster-47141.0|Cluster-76372.0|Cluster-60005.97167|Cluster-4…
KEGG	ko05016	Huntington's disease	578|13055	1607|37029	0.188391	0.943757	578	Cluster-60005.43493|Cluster-60005.3014|Cluster-60005.121035|Cluster-60005.93688|Cluster-60005.43550|Cluster-60005.42088|Cluster-60005.79302|Cluster-60005.66360|Cluster-60005.34220|Cluster-9502.0|Cluster-50145.0|Cluster-60005.22791|Cluster-60005.122628|Cluster-60005.33756|Cluster-60005.24122|Cluster-60005.33759|Cluster-60005.90158|Cluster-60005.33888|Cluster-60005.62362|Cluster-56285.0|Cluster-101…
KEGG	ko01200	Carbon metabolism	867|13055	2431|37029	0.188623	0.943757	867	Cluster-60005.96343|Cluster-60005.117176|Cluster-24534.0|Cluster-60005.20867|Cluster-60005.60571|Cluster-60005.59950|Cluster-60005.18368|Cluster-60005.43255|Cluster-60005.30259|Cluster-60005.38214|Cluster-60005.31344|Cluster-60005.38740|Cluster-60005.46724|Cluster-60005.14721|Cluster-60005.22243|Cluster-60005.21366|Cluster-60005.43956|Cluster-60005.46024|Cluster-60005.71385|Cluster-60005.50846|Cl…
KEGG	ko00362	Benzoate degradation	23|13055	52|37029	0.190705	0.943757	23	Cluster-60005.70810|Cluster-60005.5942|Cluster-60005.80031|Cluster-60005.75651|Cluster-60005.1662|Cluster-60005.107277|Cluster-60005.94373|Cluster-60005.70279|Cluster-60005.101421|Cluster-60005.117700|Cluster-32156.0|Cluster-60005.52245|Cluster-60005.66888|Cluster-60005.46416|Cluster-60005.70728|Cluster-60005.90792|Cluster-7743.0|Cluster-60005.57251|Cluster-60005.66633|Cluster-60005.71179|Cluster…
KEGG	ko04062	Chemokine signaling pathway	82|13055	211|37029	0.193132	0.943757	82	Cluster-60005.63236|Cluster-60005.66858|Cluster-60005.84100|Cluster-67839.0|Cluster-60005.109909|Cluster-60005.109973|Cluster-60005.62702|Cluster-60005.91235|Cluster-60005.69833|Cluster-60005.95049|Cluster-60005.103043|Cluster-60005.36669|Cluster-60005.50752|Cluster-60005.32824|Cluster-60005.16867|Cluster-60005.66361|Cluster-28842.0|Cluster-60005.34188|Cluster-60005.105460|Cluster-7373.0|Cluster-…
KEGG	ko04924	Renin secretion	90|13055	233|37029	0.193363	0.943757	90	Cluster-60005.95149|Cluster-60005.72439|Cluster-60005.16630|Cluster-68747.0|Cluster-81346.0|Cluster-60005.78311|Cluster-60005.34590|Cluster-60005.122746|Cluster-66359.0|Cluster-60005.105244|Cluster-60005.99666|Cluster-60005.4110|Cluster-60005.32476|Cluster-60005.55680|Cluster-60005.45821|Cluster-78564.0|Cluster-60005.64463|Cluster-60005.116098|Cluster-60005.51581|Cluster-60005.31842|Cluster-60005…
KEGG	ko04614	Renin-angiotensin system	21|13055	47|37029	0.194276	0.943757	21	Cluster-60005.54221|Cluster-60005.78003|Cluster-60005.81421|Cluster-60005.121256|Cluster-9248.0|Cluster-60005.48599|Cluster-60005.109501|Cluster-60005.86103|Cluster-60005.94823|Cluster-60005.86799|Cluster-60005.42776|Cluster-60005.70872|Cluster-60005.40778|Cluster-60005.14417|Cluster-60005.52935|Cluster-60005.56038|Cluster-38765.0|Cluster-60005.74866|Cluster-60005.67456|Cluster-9506.1|Cluster-600…
KEGG	ko04727	GABAergic synapse	87|13055	225|37029	0.195689	0.943757	87	Cluster-60005.109973|Cluster-64110.0|Cluster-60005.66361|Cluster-60005.101549|Cluster-60005.78769|Cluster-60005.27991|Cluster-60005.116673|Cluster-38854.0|Cluster-44997.0|Cluster-60005.45504|Cluster-60005.11462|Cluster-63251.0|Cluster-60005.66392|Cluster-60005.99209|Cluster-60005.34985|Cluster-60005.56552|Cluster-60005.92692|Cluster-60005.69833|Cluster-60005.41741|Cluster-60005.98460|Cluster-6000…
KEGG	ko04211	Longevity regulating pathway	216|13055	585|37029	0.200357	0.943757	216	Cluster-43025.0|Cluster-60005.65669|Cluster-60005.47859|Cluster-60005.44765|Cluster-44143.0|Cluster-60005.63691|Cluster-64348.0|Cluster-36828.0|Cluster-77991.0|Cluster-60005.79196|Cluster-60005.77535|Cluster-60005.71390|Cluster-60005.52250|Cluster-60005.64415|Cluster-60005.64413|Cluster-60005.102554|Cluster-25001.0|Cluster-60005.104047|Cluster-60005.71385|Cluster-60005.124640|Cluster-60005.34862|…
KEGG	ko04130	SNARE interactions in vesicular transport	81|13055	209|37029	0.200415	0.943757	81	Cluster-60005.39012|Cluster-60005.118771|Cluster-65168.0|Cluster-5453.0|Cluster-60005.93844|Cluster-60005.52023|Cluster-60005.72100|Cluster-60005.61954|Cluster-60005.67052|Cluster-60005.84439|Cluster-60005.67369|Cluster-60005.104257|Cluster-78151.0|Cluster-46607.0|Cluster-60005.47913|Cluster-60005.57858|Cluster-6568.0|Cluster-60005.23128|Cluster-40003.0|Cluster-60005.36093|Cluster-60005.122190|Cl…
KEGG	ko05168	Herpes simplex infection	213|13055	577|37029	0.202904	0.943757	213	Cluster-63139.0|Cluster-60005.26513|Cluster-5283.0|Cluster-60005.29112|Cluster-60005.49895|Cluster-60005.57152|Cluster-60005.67202|Cluster-60005.49208|Cluster-60005.34059|Cluster-60005.66076|Cluster-60005.46725|Cluster-60005.21776|Cluster-60005.21777|Cluster-60005.115508|Cluster-60005.39996|Cluster-60005.63193|Cluster-60005.60558|Cluster-8039.0|Cluster-60005.8472|Cluster-25038.0|Cluster-60005.409…
KEGG	ko04914	Progesterone-mediated oocyte maturation	105|13055	276|37029	0.207611	0.943757	105	Cluster-30157.0|Cluster-60005.38357|Cluster-60005.40149|Cluster-60005.52315|Cluster-60005.37937|Cluster-60005.97854|Cluster-60005.34188|Cluster-60005.37984|Cluster-60005.37985|Cluster-60005.60558|Cluster-60005.31387|Cluster-60005.24436|Cluster-60005.70509|Cluster-10244.0|Cluster-60005.3003|Cluster-60005.80876|Cluster-60005.36891|Cluster-60005.29320|Cluster-71330.0|Cluster-60005.27427|Cluster-6000…
KEGG	ko04270	Vascular smooth muscle contraction	80|13055	208|37029	0.218239	0.943757	80	Cluster-60005.93745|Cluster-51497.0|Cluster-75025.0|Cluster-60005.72439|Cluster-60005.4110|Cluster-60005.40546|Cluster-5125.0|Cluster-60005.49895|Cluster-60005.39766|Cluster-60005.99666|Cluster-81346.0|Cluster-60005.79196|Cluster-60005.91691|Cluster-60005.34059|Cluster-60005.34188|Cluster-60005.42022|Cluster-60005.84100|Cluster-60005.29555|Cluster-60005.46711|Cluster-66359.0|Cluster-60005.46301|C…
KEGG	ko04922	Glucagon signaling pathway	238|13055	650|37029	0.218585	0.943757	238	Cluster-60005.76716|Cluster-60005.45222|Cluster-60005.105244|Cluster-60005.95149|Cluster-44143.0|Cluster-60005.31622|Cluster-60005.85370|Cluster-60005.38829|Cluster-60005.45237|Cluster-60005.67505|Cluster-81346.0|Cluster-62942.0|Cluster-60005.59816|Cluster-60005.118031|Cluster-60005.24369|Cluster-60005.52250|Cluster-60005.34590|Cluster-60005.72043|Cluster-60005.122746|Cluster-66359.0|Cluster-6000…
KEGG	ko04723	Retrograde endocannabinoid signaling	46|13055	115|37029	0.219142	0.943757	46	Cluster-60005.79196|Cluster-60005.44604|Cluster-60005.66392|Cluster-60005.109973|Cluster-60005.69833|Cluster-58815.0|Cluster-60005.66361|Cluster-60005.34188|Cluster-60005.18014|Cluster-60005.99209|Cluster-26381.0|Cluster-60005.111129|Cluster-60005.91691|Cluster-60005.70177|Cluster-60005.99243|Cluster-60005.116673|Cluster-57386.0|Cluster-27795.0|Cluster-76132.0|Cluster-60005.22806|Cluster-60005.45…
KEGG	ko00061	Fatty acid biosynthesis	131|13055	350|37029	0.221752	0.943757	131	Cluster-60005.93960|Cluster-80144.1|Cluster-60005.105161|Cluster-60005.69014|Cluster-60005.65178|Cluster-60005.75022|Cluster-60005.29055|Cluster-60005.61426|Cluster-60005.19956|Cluster-60005.44978|Cluster-60005.15817|Cluster-60005.34504|Cluster-54663.0|Cluster-60005.48671|Cluster-60005.49293|Cluster-60005.85845|Cluster-56040.0|Cluster-9163.0|Cluster-60005.99700|Cluster-64157.0|Cluster-60005.17299…
KEGG	ko00280	Valine, leucine and isoleucine degradation	210|13055	572|37029	0.224236	0.943757	210	Cluster-25745.0|Cluster-60005.120013|Cluster-60005.20946|Cluster-60005.92478|Cluster-60005.68706|Cluster-60005.117179|Cluster-60005.48875|Cluster-76534.0|Cluster-60005.104179|Cluster-60005.18368|Cluster-60005.71692|Cluster-53665.0|Cluster-60005.75651|Cluster-60005.95597|Cluster-60005.39340|Cluster-70233.0|Cluster-60005.31700|Cluster-60005.78491|Cluster-72758.0|Cluster-60005.34137|Cluster-60005.11…
KEGG	ko05200	Pathways in cancer	250|13055	685|37029	0.225244	0.943757	250	Cluster-60005.52845|Cluster-67839.0|Cluster-30157.0|Cluster-60005.38357|Cluster-60005.74092|Cluster-60005.67200|Cluster-60005.79196|Cluster-76595.0|Cluster-60005.15094|Cluster-60005.66361|Cluster-60005.97854|Cluster-60005.34188|Cluster-60005.45335|Cluster-60005.91544|Cluster-71287.0|Cluster-60005.35342|Cluster-60005.105717|Cluster-60005.60558|Cluster-60005.66360|Cluster-60005.76292|Cluster-44001.…
KEGG	ko00072	Synthesis and degradation of ketone bodies	25|13055	59|37029	0.225279	0.943757	25	Cluster-60005.70810|Cluster-60005.5942|Cluster-60005.35948|Cluster-60005.80031|Cluster-60005.75651|Cluster-60005.38661|Cluster-62173.0|Cluster-60005.21717|Cluster-60005.25606|Cluster-60005.107277|Cluster-60005.94373|Cluster-60005.70279|Cluster-60005.101421|Cluster-60005.51123|Cluster-60005.66888|Cluster-60005.56559|Cluster-60005.70728|Cluster-7743.0|Cluster-60005.9238|Cluster-60005.71179|Cluster-…
KEGG	ko04726	Serotonergic synapse	28|13055	67|37029	0.225913	0.943757	28	Cluster-60005.84100|Cluster-60005.79196|Cluster-60005.109973|Cluster-28211.0|Cluster-60005.69833|Cluster-60005.66361|Cluster-60005.34188|Cluster-60005.111129|Cluster-60005.91691|Cluster-60005.70177|Cluster-57386.0|Cluster-27795.0|Cluster-60005.18014|Cluster-60005.45132|Cluster-52298.0|Cluster-60005.40546|Cluster-60005.45078|Cluster-60005.72716|Cluster-60005.42031|Cluster-60005.99209|Cluster-60005…
KEGG	ko04370	VEGF signaling pathway	75|13055	195|37029	0.226702	0.943757	75	Cluster-60005.63236|Cluster-60005.66858|Cluster-60005.84100|Cluster-60005.32824|Cluster-60005.94929|Cluster-60005.105244|Cluster-60005.95149|Cluster-60005.102479|Cluster-60005.40546|Cluster-60005.95049|Cluster-60005.103043|Cluster-6541.0|Cluster-60005.36669|Cluster-60005.2996|Cluster-60005.20219|Cluster-7043.0|Cluster-60005.42031|Cluster-60005.34188|Cluster-60005.105460|Cluster-8986.0|Cluster-600…
KEGG	ko04722	Neurotrophin signaling pathway	130|13055	348|37029	0.228252	0.943757	130	Cluster-67839.0|Cluster-68747.0|Cluster-81346.0|Cluster-60005.61833|Cluster-28842.0|Cluster-60005.34188|Cluster-60005.119855|Cluster-66359.0|Cluster-60005.72606|Cluster-60005.95838|Cluster-44001.0|Cluster-60005.99666|Cluster-60005.4110|Cluster-60005.32476|Cluster-60005.31381|Cluster-60005.55680|Cluster-60005.87738|Cluster-53067.0|Cluster-60005.45821|Cluster-78564.0|Cluster-60005.74246|Cluster-600…
KEGG	ko00500	Starch and sucrose metabolism	280|13055	771|37029	0.231887	0.943757	280	Cluster-60005.106810|Cluster-82135.0|Cluster-60005.104173|Cluster-60005.104172|Cluster-60005.104171|Cluster-60005.57712|Cluster-60005.43880|Cluster-60005.47850|Cluster-60005.39826|Cluster-60005.42434|Cluster-60005.61429|Cluster-60005.85528|Cluster-60005.34446|Cluster-60005.40053|Cluster-60005.60145|Cluster-60005.30129|Cluster-60005.35066|Cluster-60005.63593|Cluster-60005.52525|Cluster-60005.61937…
KEGG	ko00051	Fructose and mannose metabolism	118|13055	315|37029	0.232638	0.943757	118	Cluster-60005.53536|Cluster-60005.29441|Cluster-60005.51604|Cluster-60005.27056|Cluster-60005.40053|Cluster-60005.30417|Cluster-60005.22243|Cluster-60005.60244|Cluster-60005.93527|Cluster-60005.55270|Cluster-60005.56319|Cluster-60005.115838|Cluster-60005.49054|Cluster-60005.108644|Cluster-60005.63612|Cluster-60005.114585|Cluster-60005.51342|Cluster-60005.53527|Cluster-60005.77734|Cluster-60005.50…
KEGG	ko04730	Long-term depression	50|13055	127|37029	0.234742	0.943757	50	Cluster-60005.27608|Cluster-60005.91739|Cluster-60005.72439|Cluster-59244.0|Cluster-60005.28569|Cluster-60005.40546|Cluster-60005.95436|Cluster-60005.58587|Cluster-60005.72415|Cluster-60005.97701|Cluster-60005.87870|Cluster-60005.34188|Cluster-60005.47501|Cluster-60005.47059|Cluster-60005.84100|Cluster-60005.58588|Cluster-60005.39139|Cluster-60005.70177|Cluster-60005.14885|Cluster-60005.73937|Clu…
KEGG	ko05322	Systemic lupus erythematosus	87|13055	229|37029	0.235288	0.943757	87	Cluster-60005.61712|Cluster-60005.13430|Cluster-60005.11895|Cluster-60005.95388|Cluster-60005.53488|Cluster-56766.0|Cluster-60005.54674|Cluster-60005.57390|Cluster-60005.115261|Cluster-60005.57050|Cluster-60005.70252|Cluster-53066.0|Cluster-60005.42720|Cluster-60950.0|Cluster-60005.104386|Cluster-60005.50780|Cluster-60005.41889|Cluster-60005.39104|Cluster-60005.4370|Cluster-60005.97316|Cluster-60…
KEGG	ko05014	Amyotrophic lateral sclerosis (ALS)	85|13055	224|37029	0.241056	0.943757	85	Cluster-60005.66858|Cluster-60005.90399|Cluster-60005.94929|Cluster-60005.114573|Cluster-60005.105244|Cluster-60005.95149|Cluster-60005.102479|Cluster-60005.16548|Cluster-60005.67770|Cluster-25085.0|Cluster-60005.39001|Cluster-8810.0|Cluster-60005.103043|Cluster-6541.0|Cluster-60005.36669|Cluster-60005.2996|Cluster-60005.20219|Cluster-60005.66360|Cluster-60005.105460|Cluster-60005.2281|Cluster-89…
KEGG	ko05152	Tuberculosis	209|13055	572|37029	0.242675	0.943757	209	Cluster-60005.95149|Cluster-60005.88314|Cluster-60005.105244|Cluster-60005.75385|Cluster-60005.35199|Cluster-60005.90652|Cluster-68747.0|Cluster-60005.62745|Cluster-81346.0|Cluster-60005.66360|Cluster-60005.34188|Cluster-60005.34590|Cluster-60005.61935|Cluster-60005.47918|Cluster-60005.122746|Cluster-60005.47030|Cluster-60005.48061|Cluster-66359.0|Cluster-60005.30152|Cluster-60005.75256|Cluster-6…
KEGG	ko04360	Axon guidance	86|13055	227|37029	0.243426	0.943757	86	Cluster-60005.95149|Cluster-67839.0|Cluster-60005.105244|Cluster-28842.0|Cluster-60005.15941|Cluster-60005.34590|Cluster-60005.122746|Cluster-44001.0|Cluster-60005.31381|Cluster-60005.87738|Cluster-60005.79966|Cluster-60005.64463|Cluster-60005.56007|Cluster-60005.4860|Cluster-7043.0|Cluster-60005.78311|Cluster-68304.0|Cluster-60005.66858|Cluster-60005.53806|Cluster-60005.40934|Cluster-60005.10536…
KEGG	ko04712	Circadian rhythm - plant	45|13055	114|37029	0.244162	0.943757	45	Cluster-60005.81307|Cluster-60005.67657|Cluster-60005.54965|Cluster-60005.53693|Cluster-67144.0|Cluster-60005.82342|Cluster-60005.80836|Cluster-60005.43418|Cluster-60005.39229|Cluster-60005.47391|Cluster-8234.0|Cluster-63475.0|Cluster-60005.53661|Cluster-60005.81629|Cluster-8039.0|Cluster-60005.55010|Cluster-60005.14768|Cluster-60005.69305|Cluster-60005.84453|Cluster-60005.68340|Cluster-60005.529…
KEGG	ko04151	PI3K-Akt signaling pathway	355|13055	987|37029	0.248709	0.943757	355	Cluster-60005.63691|Cluster-60005.42734|Cluster-60005.82199|Cluster-60005.47636|Cluster-60005.59816|Cluster-60005.37937|Cluster-60005.66361|Cluster-28842.0|Cluster-60005.34188|Cluster-60005.64415|Cluster-60005.64413|Cluster-30157.0|Cluster-60005.53972|Cluster-60005.28670|Cluster-4831.0|Cluster-60005.119476|Cluster-60005.58420|Cluster-60005.52249|Cluster-60005.66858|Cluster-60005.60546|Cluster-637…
KEGG	ko00740	Riboflavin metabolism	39|13055	98|37029	0.249683	0.943757	39	Cluster-60005.69341|Cluster-60005.43666|Cluster-81734.0|Cluster-60005.97210|Cluster-60005.35120|Cluster-60005.105468|Cluster-60005.49166|Cluster-60005.102193|Cluster-60005.102192|Cluster-60005.102191|Cluster-60005.8750|Cluster-57349.0|Cluster-60005.9763|Cluster-60005.23367|Cluster-60005.56622|Cluster-60005.124418|Cluster-60005.71442|Cluster-51035.1|Cluster-60005.28166|Cluster-60005.26999|Cluster-…
KEGG	ko05161	Hepatitis B	103|13055	275|37029	0.250019	0.943757	103	Cluster-60005.39515|Cluster-60005.10669|Cluster-60005.37937|Cluster-60005.34188|Cluster-60005.37984|Cluster-60005.37985|Cluster-60005.60558|Cluster-60005.28908|Cluster-60005.46696|Cluster-60005.39597|Cluster-4831.0|Cluster-60005.17441|Cluster-60005.93816|Cluster-60005.56002|Cluster-60005.15635|Cluster-60005.47626|Cluster-60005.9468|Cluster-63766.0|Cluster-60005.22806|Cluster-60005.59226|Cluster-6…
KEGG	ko04626	Plant-pathogen interaction	179|13055	489|37029	0.254447	0.943757	179	Cluster-75025.0|Cluster-30157.0|Cluster-60005.38357|Cluster-60005.39948|Cluster-68747.0|Cluster-60005.118031|Cluster-60005.75020|Cluster-81346.0|Cluster-60005.97854|Cluster-60005.39613|Cluster-48636.0|Cluster-13586.0|Cluster-60005.75310|Cluster-60005.69521|Cluster-34706.0|Cluster-60005.99666|Cluster-43849.0|Cluster-60005.32476|Cluster-60005.87734|Cluster-60005.55680|Cluster-60005.69262|Cluster-60…
KEGG	ko05216	Thyroid cancer	15|13055	34|37029	0.256908	0.943757	15	Cluster-60005.84100|Cluster-60005.28132|Cluster-76595.0|Cluster-60005.70177|Cluster-60005.69749|Cluster-60005.41969|Cluster-60005.48858|Cluster-60005.40971|Cluster-60005.67200|Cluster-60005.34188|Cluster-60005.22806|Cluster-60005.64462|Cluster-60005.42031|Cluster-60005.40546|Cluster-60005.32942
KEGG	ko04921	Oxytocin signaling pathway	184|13055	504|37029	0.260982	0.943757	184	Cluster-60005.95149|Cluster-60005.59187|Cluster-60005.72439|Cluster-44143.0|Cluster-5125.0|Cluster-60005.49895|Cluster-43076.0|Cluster-60005.8877|Cluster-60005.34059|Cluster-60005.52250|Cluster-60005.34590|Cluster-60005.122746|Cluster-66359.0|Cluster-60005.59027|Cluster-60005.105244|Cluster-60005.99666|Cluster-43849.0|Cluster-3414.0|Cluster-60005.32476|Cluster-60005.101113|Cluster-60005.55680|Clu…
KEGG	ko04015	Rap1 signaling pathway	96|13055	257|37029	0.265784	0.943757	96	Cluster-60005.36669|Cluster-68747.0|Cluster-81346.0|Cluster-60005.34188|Cluster-66359.0|Cluster-44001.0|Cluster-60005.99666|Cluster-43849.0|Cluster-60005.32476|Cluster-60005.55680|Cluster-60005.87738|Cluster-60005.45821|Cluster-78564.0|Cluster-60005.94914|Cluster-60005.4860|Cluster-7043.0|Cluster-60005.74652|Cluster-60005.66858|Cluster-60005.81678|Cluster-60005.105363|Cluster-60005.98370|Cluster-…
KEGG	ko04114	Oocyte meiosis	220|13055	607|37029	0.268908	0.943757	220	Cluster-60005.95149|Cluster-60005.95436|Cluster-60005.105244|Cluster-59244.0|Cluster-60005.29112|Cluster-5125.0|Cluster-60005.49895|Cluster-60005.45236|Cluster-60005.49208|Cluster-60005.61833|Cluster-60005.34059|Cluster-60005.34188|Cluster-60005.34590|Cluster-60005.122746|Cluster-66359.0|Cluster-60005.72606|Cluster-60005.60558|Cluster-64379.0|Cluster-60005.95838|Cluster-60005.99666|Cluster-43849.…
KEGG	ko00791	Atrazine degradation	2|13055	2|37029	0.272179	0.943757	2	Cluster-60005.58050|Cluster-60005.93318
KEGG	ko00260	Glycine, serine and threonine metabolism	248|13055	687|37029	0.272578	0.943757	248	Cluster-60005.41181|Cluster-60005.34382|Cluster-60005.51038|Cluster-60005.59950|Cluster-60005.54256|Cluster-60005.11724|Cluster-60005.95066|Cluster-60005.55821|Cluster-60005.81694|Cluster-60005.38214|Cluster-60005.39340|Cluster-60005.101599|Cluster-60005.42591|Cluster-60005.84737|Cluster-60005.79164|Cluster-60005.122675|Cluster-60005.70599|Cluster-60005.6165|Cluster-60005.98364|Cluster-60005.6067…
KEGG	ko04621	NOD-like receptor signaling pathway	54|13055	141|37029	0.277237	0.943757	54	Cluster-60005.97006|Cluster-30157.0|Cluster-60005.38357|Cluster-60005.39948|Cluster-60005.50187|Cluster-60005.54644|Cluster-60005.82199|Cluster-60005.42031|Cluster-60005.97854|Cluster-60005.34188|Cluster-51412.1|Cluster-13586.0|Cluster-60005.18192|Cluster-58288.0|Cluster-50068.0|Cluster-60005.8472|Cluster-60005.50363|Cluster-60005.95087|Cluster-50167.0|Cluster-60005.89107|Cluster-60005.99148|Clus…
KEGG	ko00591	Linoleic acid metabolism	15|13055	35|37029	0.285687	0.943757	15	Cluster-60005.6478|Cluster-60005.112171|Cluster-60005.31416|Cluster-60005.42342|Cluster-62544.0|Cluster-60005.70343|Cluster-79639.0|Cluster-60005.12048|Cluster-56812.0|Cluster-40857.0|Cluster-60005.51992|Cluster-60005.48544|Cluster-60005.20367|Cluster-60005.42022|Cluster-60005.119182
KEGG	ko05133	Pertussis	58|13055	153|37029	0.290059	0.943757	58	Cluster-78429.0|Cluster-5125.0|Cluster-75025.0|Cluster-60005.4110|Cluster-60005.31085|Cluster-60005.40546|Cluster-60005.112399|Cluster-68747.0|Cluster-60005.39766|Cluster-60005.99666|Cluster-81346.0|Cluster-60005.34188|Cluster-60005.15941|Cluster-60005.57816|Cluster-60005.57817|Cluster-66359.0|Cluster-60005.40968|Cluster-66452.0|Cluster-60005.21513|Cluster-60005.48864|Cluster-60005.93039|Cluster-…
KEGG	ko04650	Natural killer cell mediated cytotoxicity	63|13055	167|37029	0.291144	0.943757	63	Cluster-60005.66858|Cluster-60005.84100|Cluster-60005.94929|Cluster-60005.105244|Cluster-60005.95149|Cluster-60005.102479|Cluster-60005.40546|Cluster-8810.0|Cluster-60005.103043|Cluster-6541.0|Cluster-60005.36669|Cluster-60005.2996|Cluster-60005.20219|Cluster-7043.0|Cluster-60005.42031|Cluster-60005.34188|Cluster-60005.105460|Cluster-7373.0|Cluster-8986.0|Cluster-60005.34590|Cluster-60005.122746|…
KEGG	ko05416	Viral myocarditis	63|13055	167|37029	0.291144	0.943757	63	Cluster-60005.66858|Cluster-60005.16548|Cluster-60005.55404|Cluster-60005.95049|Cluster-60005.103043|Cluster-60005.36669|Cluster-60005.2996|Cluster-60005.66360|Cluster-60005.53146|Cluster-60005.53147|Cluster-60005.105460|Cluster-8986.0|Cluster-60005.60745|Cluster-7910.0|Cluster-60005.114573|Cluster-29607.0|Cluster-66574.0|Cluster-60005.4784|Cluster-60005.101294|Cluster-6541.0|Cluster-60005.106093…
KEGG	ko05031	Amphetamine addiction	78|13055	209|37029	0.292348	0.943757	78	Cluster-60005.93745|Cluster-51497.0|Cluster-60005.79196|Cluster-60005.94929|Cluster-60005.99666|Cluster-60005.95149|Cluster-60005.4110|Cluster-28211.0|Cluster-5125.0|Cluster-60005.49895|Cluster-60005.39766|Cluster-60005.102479|Cluster-81346.0|Cluster-60005.59914|Cluster-60005.20219|Cluster-60005.34059|Cluster-60005.76997|Cluster-60005.34590|Cluster-60005.122746|Cluster-60005.29555|Cluster-60005.4…
KEGG	ko00650	Butanoate metabolism	65|13055	173|37029	0.296805	0.943757	65	Cluster-60005.107277|Cluster-60005.70812|Cluster-60005.70810|Cluster-60005.97173|Cluster-60005.117176|Cluster-60005.5942|Cluster-60005.70728|Cluster-64110.0|Cluster-60005.46368|Cluster-60005.52589|Cluster-60005.35948|Cluster-55672.0|Cluster-60005.60761|Cluster-60005.75651|Cluster-60005.38661|Cluster-60005.21717|Cluster-60005.9238|Cluster-62173.0|Cluster-60005.80031|Cluster-60005.116440|Cluster-60…
KEGG	ko04662	B cell receptor signaling pathway	70|13055	187|37029	0.297165	0.943757	70	Cluster-60005.66858|Cluster-60005.84100|Cluster-67839.0|Cluster-60005.94929|Cluster-60005.105244|Cluster-60005.95149|Cluster-60005.102479|Cluster-60005.40546|Cluster-60005.95049|Cluster-60005.103043|Cluster-6541.0|Cluster-60005.36669|Cluster-60005.50752|Cluster-60005.102918|Cluster-7043.0|Cluster-60005.91235|Cluster-28842.0|Cluster-60005.34188|Cluster-60005.105460|Cluster-8986.0|Cluster-60005.345…
KEGG	ko00540	Lipopolysaccharide biosynthesis	8|13055	17|37029	0.298372	0.943757	8	Cluster-60005.59020|Cluster-60005.59096|Cluster-60005.41582|Cluster-41636.0|Cluster-60005.115621|Cluster-60005.72941|Cluster-60005.57416|Cluster-60005.66622
KEGG	ko05169	Epstein-Barr virus infection	503|13055	1420|37029	0.299636	0.943757	503	Cluster-5283.0|Cluster-60005.74854|Cluster-60005.61833|Cluster-60005.37937|Cluster-28842.0|Cluster-60005.14768|Cluster-50145.0|Cluster-60005.22791|Cluster-60005.37984|Cluster-60005.37985|Cluster-8039.0|Cluster-60005.47686|Cluster-60005.18248|Cluster-60005.94478|Cluster-60005.24436|Cluster-60005.119473|Cluster-60005.82100|Cluster-60005.69525|Cluster-60005.42920|Cluster-60005.80000|Cluster-60005.62…
KEGG	ko05218	Melanoma	21|13055	52|37029	0.3089	0.943757	21	Cluster-60005.84100|Cluster-60005.70177|Cluster-78061.0|Cluster-60005.41969|Cluster-60005.16854|Cluster-60005.40546|Cluster-60005.85604|Cluster-51449.0|Cluster-63766.0|Cluster-60005.38975|Cluster-60005.50347|Cluster-60005.74335|Cluster-60005.34188|Cluster-60005.22806|Cluster-4831.0|Cluster-7868.0|Cluster-60005.42031|Cluster-60005.44624|Cluster-60005.22137|Cluster-60005.93816|Cluster-60005.111310
KEGG	ko03013	RNA transport	544|13055	1541|37029	0.315656	0.943757	544	Cluster-60005.110889|Cluster-44530.0|Cluster-60005.38191|Cluster-60005.46332|Cluster-64741.0|Cluster-64741.1|Cluster-47533.0|Cluster-60005.59350|Cluster-60005.7557|Cluster-60005.55568|Cluster-46135.0|Cluster-60005.124413|Cluster-56116.0|Cluster-5765.0|Cluster-60005.64462|Cluster-60005.91676|Cluster-60005.84603|Cluster-60005.68176|Cluster-60005.61164|Cluster-60005.74129|Cluster-60005.61166|Cluster…
KEGG	ko04962	Vasopressin-regulated water reabsorption	60|13055	161|37029	0.324513	0.943757	60	Cluster-60005.79196|Cluster-60005.58070|Cluster-60005.64843|Cluster-60005.76491|Cluster-7736.0|Cluster-60005.32369|Cluster-60005.95425|Cluster-60005.44868|Cluster-60005.95250|Cluster-60005.8412|Cluster-8451.1|Cluster-60005.91691|Cluster-60005.8435|Cluster-60005.3872|Cluster-60005.93085|Cluster-60005.88393|Cluster-60005.11226|Cluster-57386.0|Cluster-60005.60828|Cluster-60005.60997|Cluster-60005.32…
KEGG	ko00281	Geraniol degradation	7|13055	15|37029	0.324948	0.943757	7	Cluster-60005.54534|Cluster-60005.81601|Cluster-60005.51123|Cluster-60005.92268|Cluster-55672.0|Cluster-60005.38661|Cluster-60005.9238
KEGG	ko04913	Ovarian steroidogenesis	13|13055	31|37029	0.327507	0.943757	13	Cluster-60005.45132|Cluster-60005.71390|Cluster-60005.72716|Cluster-60005.91691|Cluster-52298.0|Cluster-60005.69739|Cluster-60005.38623|Cluster-60005.79196|Cluster-57386.0|Cluster-60005.12217|Cluster-60005.114625|Cluster-60005.58818|Cluster-60005.55105
KEGG	ko05162	Measles	151|13055	419|37029	0.3308	0.943757	151	Cluster-60005.96108|Cluster-67839.0|Cluster-60005.51350|Cluster-5283.0|Cluster-60005.58057|Cluster-60005.21486|Cluster-65779.0|Cluster-69885.0|Cluster-60005.37937|Cluster-60005.49333|Cluster-28842.0|Cluster-60005.46725|Cluster-60005.60558|Cluster-60005.31939|Cluster-60005.37749|Cluster-8039.0|Cluster-60005.8472|Cluster-60005.18248|Cluster-60005.40942|Cluster-60005.31381|Cluster-60005.95575|Cluste…
KEGG	ko01521	EGFR tyrosine kinase inhibitor resistance	90|13055	246|37029	0.331007	0.943757	90	Cluster-43025.0|Cluster-67839.0|Cluster-64348.0|Cluster-77991.0|Cluster-60005.77535|Cluster-28842.0|Cluster-60005.34188|Cluster-60005.122021|Cluster-60005.31381|Cluster-4831.0|Cluster-60005.119476|Cluster-70569.0|Cluster-60005.79421|Cluster-60005.16020|Cluster-60005.16021|Cluster-60005.57022|Cluster-7548.0|Cluster-57813.0|Cluster-60005.89315|Cluster-60005.54262|Cluster-60005.22806|Cluster-60005.5…
KEGG	ko00030	Pentose phosphate pathway	155|13055	431|37029	0.336351	0.943757	155	Cluster-60005.30804|Cluster-60005.96343|Cluster-60005.21366|Cluster-60005.20867|Cluster-60005.43766|Cluster-60005.39512|Cluster-60005.42434|Cluster-60005.102414|Cluster-60005.65380|Cluster-60005.110691|Cluster-60005.15368|Cluster-60005.74382|Cluster-60005.48581|Cluster-60005.50846|Cluster-60005.47436|Cluster-59757.0|Cluster-60005.63612|Cluster-60005.35477|Cluster-60005.32570|Cluster-60005.114585|…
KEGG	ko05134	Legionellosis	218|13055	612|37029	0.346394	0.943757	218	Cluster-60005.67778|Cluster-76186.0|Cluster-60005.75384|Cluster-31208.0|Cluster-60005.14319|Cluster-60005.58057|Cluster-60005.21486|Cluster-60005.62745|Cluster-60005.68850|Cluster-60005.16836|Cluster-69885.0|Cluster-20508.1|Cluster-60005.66360|Cluster-54952.0|Cluster-60005.52219|Cluster-60005.25290|Cluster-60005.47918|Cluster-60005.47030|Cluster-60005.39199|Cluster-60005.53075|Cluster-60005.31939…
KEGG	ko05212	Pancreatic cancer	53|13055	143|37029	0.349608	0.943757	53	Cluster-60005.66858|Cluster-60005.84100|Cluster-60005.40546|Cluster-60005.85604|Cluster-60005.95049|Cluster-60005.103043|Cluster-60005.69812|Cluster-60005.2996|Cluster-11476.0|Cluster-60005.34188|Cluster-60005.105460|Cluster-8986.0|Cluster-60005.60745|Cluster-7910.0|Cluster-60005.114573|Cluster-60005.70177|Cluster-7514.0|Cluster-44001.0|Cluster-6541.0|Cluster-60005.87738|Cluster-60005.73013|Clust…
KEGG	ko02024	Quorum sensing	113|13055	313|37029	0.350998	0.943757	113	Cluster-80144.1|Cluster-60005.69014|Cluster-60005.49166|Cluster-32511.0|Cluster-60005.29055|Cluster-60005.19956|Cluster-60005.7889|Cluster-60005.15817|Cluster-60005.92639|Cluster-60005.23367|Cluster-60005.39543|Cluster-64110.0|Cluster-60005.53874|Cluster-9163.0|Cluster-60005.69261|Cluster-60005.99700|Cluster-64157.0|Cluster-60005.63251|Cluster-60005.61941|Cluster-60005.62361|Cluster-60005.74554|C…
KEGG	ko01051	Biosynthesis of ansamycins	16|13055	40|37029	0.353892	0.943757	16	Cluster-60005.59747|Cluster-60005.52741|Cluster-60005.101803|Cluster-60005.48581|Cluster-60005.74620|Cluster-60005.52430|Cluster-60005.41640|Cluster-60005.58029|Cluster-60005.103803|Cluster-60005.50626|Cluster-60005.53103|Cluster-60005.65674|Cluster-60005.51529|Cluster-60005.46996|Cluster-60005.50223|Cluster-60005.119560
KEGG	ko04310	Wnt signaling pathway	162|13055	453|37029	0.3546	0.943757	162	Cluster-60005.93125|Cluster-67839.0|Cluster-60005.105244|Cluster-60005.95149|Cluster-60005.29112|Cluster-60005.80836|Cluster-60005.49208|Cluster-28842.0|Cluster-60005.34590|Cluster-60005.122746|Cluster-44001.0|Cluster-8039.0|Cluster-60005.8472|Cluster-25038.0|Cluster-60005.31381|Cluster-60005.87738|Cluster-60005.59333|Cluster-60005.59218|Cluster-53067.0|Cluster-60005.44192|Cluster-60005.64463|Clu…
KEGG	ko03070	Bacterial secretion system	44|13055	118|37029	0.354646	0.943757	44	Cluster-60005.43983|Cluster-60005.53453|Cluster-60005.43986|Cluster-60005.97079|Cluster-60005.44703|Cluster-60005.39380|Cluster-60005.62720|Cluster-60005.47156|Cluster-60005.90332|Cluster-60005.74554|Cluster-32511.0|Cluster-60005.70929|Cluster-60005.7889|Cluster-60005.79372|Cluster-60005.68325|Cluster-60005.84997|Cluster-60005.92639|Cluster-60005.29735|Cluster-60005.53874|Cluster-60005.80202|Clus…
KEGG	ko04912	GnRH signaling pathway	63|13055	172|37029	0.361445	0.943757	63	Cluster-5125.0|Cluster-60005.79196|Cluster-60005.42188|Cluster-60005.42189|Cluster-60005.75944|Cluster-60005.4110|Cluster-60005.42737|Cluster-60005.111869|Cluster-68747.0|Cluster-60005.297|Cluster-60005.39766|Cluster-60005.99666|Cluster-81346.0|Cluster-60005.34188|Cluster-60005.84100|Cluster-66359.0|Cluster-60005.40968|Cluster-66452.0|Cluster-60005.21513|Cluster-75025.0|Cluster-43849.0|Cluster-60…
KEGG	ko00930	Caprolactam degradation	7|13055	16|37029	0.372389	0.943757	7	Cluster-60005.116063|Cluster-60005.65830|Cluster-60005.86749|Cluster-60005.50090|Cluster-4397.0|Cluster-11265.0|Cluster-60005.9022
KEGG	ko04930	Type II diabetes mellitus	66|13055	182|37029	0.383033	0.943757	66	Cluster-60005.66303|Cluster-60005.21893|Cluster-60005.16859|Cluster-60005.53358|Cluster-60005.50460|Cluster-60005.10098|Cluster-60005.63129|Cluster-60005.31567|Cluster-60005.40546|Cluster-60005.58310|Cluster-60005.45237|Cluster-60005.16916|Cluster-60005.55775|Cluster-60005.8812|Cluster-60005.34188|Cluster-60005.62682|Cluster-60005.41969|Cluster-60005.24760|Cluster-53708.0|Cluster-60005.92635|Clus…
KEGG	ko05160	Hepatitis C	79|13055	219|37029	0.383262	0.943757	79	Cluster-60005.27608|Cluster-67839.0|Cluster-8894.0|Cluster-60005.12217|Cluster-60005.46725|Cluster-59244.0|Cluster-5283.0|Cluster-60005.87870|Cluster-60005.40546|Cluster-60005.95436|Cluster-60005.52644|Cluster-60005.38623|Cluster-60005.58776|Cluster-60005.50752|Cluster-60005.97701|Cluster-60005.34489|Cluster-60005.91235|Cluster-28842.0|Cluster-60005.34188|Cluster-60005.47501|Cluster-60005.47059|C…
KEGG	ko00531	Glycosaminoglycan degradation	21|13055	55|37029	0.385712	0.943757	21	Cluster-60005.114960|Cluster-60005.106763|Cluster-52236.0|Cluster-60005.92797|Cluster-60005.13292|Cluster-60005.1870|Cluster-60005.97238|Cluster-60005.45164|Cluster-4771.0|Cluster-60005.108756|Cluster-60005.58306|Cluster-60005.74667|Cluster-57032.0|Cluster-60005.108757|Cluster-70478.0|Cluster-50817.0|Cluster-60005.20273|Cluster-49005.0|Cluster-60005.99129|Cluster-60005.73790|Cluster-60005.42860
KEGG	ko00906	Carotenoid biosynthesis	71|13055	197|37029	0.393922	0.943757	71	Cluster-60005.47958|Cluster-60005.35898|Cluster-60005.74549|Cluster-60005.69956|Cluster-60005.57196|Cluster-38447.0|Cluster-60005.52867|Cluster-6599.0|Cluster-60005.55702|Cluster-60005.84846|Cluster-8903.0|Cluster-60005.121422|Cluster-60005.57732|Cluster-60005.57972|Cluster-60005.51575|Cluster-60005.95102|Cluster-60005.40200|Cluster-60005.51209|Cluster-60005.58262|Cluster-60005.40742|Cluster-6000…
KEGG	ko04931	Insulin resistance	170|13055	481|37029	0.400181	0.943757	170	Cluster-43025.0|Cluster-67839.0|Cluster-44143.0|Cluster-60005.31622|Cluster-60005.49895|Cluster-60005.56841|Cluster-77991.0|Cluster-60005.69962|Cluster-60005.59816|Cluster-60005.34059|Cluster-28842.0|Cluster-60005.52250|Cluster-60005.63593|Cluster-60005.53606|Cluster-60005.5187|Cluster-60005.90222|Cluster-60005.122021|Cluster-60005.31381|Cluster-4831.0|Cluster-60005.28372|Cluster-60005.119476|Clu…
KEGG	ko04970	Salivary secretion	89|13055	249|37029	0.401955	0.943757	89	Cluster-60005.86700|Cluster-60005.75884|Cluster-60005.72439|Cluster-60005.92336|Cluster-60005.114963|Cluster-68747.0|Cluster-81346.0|Cluster-66359.0|Cluster-60005.99666|Cluster-60005.4110|Cluster-60005.73937|Cluster-60005.73936|Cluster-60005.32476|Cluster-60005.55680|Cluster-60005.45821|Cluster-78564.0|Cluster-7711.0|Cluster-79138.0|Cluster-60005.55749|Cluster-60005.60959|Cluster-60005.31842|Clus…
KEGG	ko01212	Fatty acid metabolism	248|13055	706|37029	0.406099	0.943757	248	Cluster-60005.93960|Cluster-60005.57550|Cluster-80144.1|Cluster-60005.81886|Cluster-60005.92335|Cluster-76534.0|Cluster-60005.65178|Cluster-60005.107380|Cluster-60005.75651|Cluster-60005.60062|Cluster-60005.29055|Cluster-60005.61426|Cluster-60005.59420|Cluster-60005.19956|Cluster-60005.34137|Cluster-60005.15817|Cluster-60005.34504|Cluster-54663.0|Cluster-60005.48671|Cluster-60005.70154|Cluster-60…
KEGG	ko04380	Osteoclast differentiation	71|13055	198|37029	0.40789	0.943757	71	Cluster-60005.66858|Cluster-60005.84100|Cluster-60005.94929|Cluster-60005.105244|Cluster-60005.95149|Cluster-60005.102479|Cluster-60005.80595|Cluster-60005.40546|Cluster-8810.0|Cluster-60005.103043|Cluster-6541.0|Cluster-60005.36669|Cluster-60005.2996|Cluster-60005.20219|Cluster-7043.0|Cluster-60005.42031|Cluster-60005.34188|Cluster-60005.105460|Cluster-8986.0|Cluster-60005.34590|Cluster-60005.12…
KEGG	ko03450	Non-homologous end-joining	32|13055	87|37029	0.409248	0.943757	32	Cluster-60005.7801|Cluster-60005.10097|Cluster-60005.95301|Cluster-60005.67631|Cluster-60005.62108|Cluster-60005.54435|Cluster-60005.13224|Cluster-60005.59411|Cluster-60005.40929|Cluster-38404.0|Cluster-60005.88664|Cluster-60005.68574|Cluster-60005.86482|Cluster-60005.112859|Cluster-60005.24424|Cluster-61407.0|Cluster-60005.44552|Cluster-60005.39175|Cluster-60005.111874|Cluster-60005.60916|Cluste…
KEGG	ko00620	Pyruvate metabolism	310|13055	886|37029	0.415688	0.943757	310	Cluster-60005.101421|Cluster-60005.45222|Cluster-60005.66052|Cluster-60541.1|Cluster-60005.53020|Cluster-60005.38829|Cluster-60005.45237|Cluster-56858.0|Cluster-60005.43255|Cluster-60005.75651|Cluster-60005.45233|Cluster-53708.0|Cluster-60005.38740|Cluster-60005.51922|Cluster-60005.104460|Cluster-60005.74944|Cluster-60005.89261|Cluster-60005.89262|Cluster-60005.52414|Cluster-60005.109531|Cluster-…
KEGG	ko05220	Chronic myeloid leukemia	28|13055	76|37029	0.416737	0.943757	28	Cluster-60005.84100|Cluster-60005.28552|Cluster-60005.62607|Cluster-60005.40546|Cluster-60005.34287|Cluster-60005.64253|Cluster-60005.46765|Cluster-60005.34188|Cluster-60005.91544|Cluster-60005.70177|Cluster-60005.51683|Cluster-60005.85604|Cluster-60005.120754|Cluster-60005.31457|Cluster-51449.0|Cluster-78061.0|Cluster-60005.93816|Cluster-60005.27731|Cluster-60005.74092|Cluster-65075.0|Cluster-60…
KEGG	ko05230	Central carbon metabolism in cancer	125|13055	354|37029	0.422206	0.943757	125	Cluster-60005.45222|Cluster-60005.38829|Cluster-60005.45237|Cluster-60005.55753|Cluster-60005.40053|Cluster-60005.34188|Cluster-60005.22243|Cluster-60005.74382|Cluster-60005.92635|Cluster-60005.89305|Cluster-60005.108644|Cluster-60005.18718|Cluster-4831.0|Cluster-60005.119476|Cluster-60005.20427|Cluster-60005.16020|Cluster-60005.16021|Cluster-60005.121172|Cluster-60005.114585|Cluster-60005.92229|…
KEGG	ko04612	Antigen processing and presentation	143|13055	406|37029	0.424636	0.943757	143	Cluster-60005.59182|Cluster-60005.16630|Cluster-60005.52848|Cluster-60005.58057|Cluster-60005.21486|Cluster-60005.17976|Cluster-60005.17975|Cluster-60005.17974|Cluster-69885.0|Cluster-60005.97854|Cluster-60005.56885|Cluster-60005.25290|Cluster-60005.48878|Cluster-60005.31939|Cluster-60005.38357|Cluster-60005.26868|Cluster-60005.18248|Cluster-60005.49964|Cluster-60005.15335|Cluster-10244.0|Cluster…
KEGG	ko04146	Peroxisome	305|13055	873|37029	0.42527	0.943757	305	Cluster-60005.57550|Cluster-60005.29203|Cluster-60005.47859|Cluster-80144.1|Cluster-60005.67770|Cluster-60005.92335|Cluster-60005.56787|Cluster-76534.0|Cluster-60005.12128|Cluster-60005.79026|Cluster-60005.110752|Cluster-60005.101597|Cluster-60005.86058|Cluster-74316.0|Cluster-60005.30913|Cluster-60005.101599|Cluster-60005.29055|Cluster-60005.61394|Cluster-60005.77626|Cluster-60005.61504|Cluster-…
KEGG	ko04750	Inflammatory mediator regulation of TRP channels	59|13055	165|37029	0.427342	0.943757	59	Cluster-60005.93745|Cluster-51497.0|Cluster-60005.79196|Cluster-60005.4110|Cluster-5125.0|Cluster-60005.49895|Cluster-60005.39766|Cluster-60005.99666|Cluster-81346.0|Cluster-60005.34059|Cluster-60005.29555|Cluster-60005.46711|Cluster-66359.0|Cluster-60005.46301|Cluster-60005.40968|Cluster-66452.0|Cluster-60005.21513|Cluster-75025.0|Cluster-43849.0|Cluster-60005.71157|Cluster-60005.79674|Cluster-6…
KEGG	ko00130	Ubiquinone and other terpenoid-quinone biosynthesis	74|13055	208|37029	0.427534	0.943757	74	Cluster-60005.68878|Cluster-60005.57981|Cluster-60005.47488|Cluster-60005.42495|Cluster-60005.6282|Cluster-63078.0|Cluster-60005.65057|Cluster-60005.63915|Cluster-60005.40784|Cluster-60005.15307|Cluster-60005.90815|Cluster-30592.0|Cluster-60005.19821|Cluster-60005.97763|Cluster-60005.33397|Cluster-67242.0|Cluster-60005.84924|Cluster-60005.25516|Cluster-60005.51983|Cluster-60005.58918|Cluster-6000…
KEGG	ko04972	Pancreatic secretion	106|13055	300|37029	0.428955	0.943757	106	Cluster-60005.50732|Cluster-60005.69794|Cluster-60005.68852|Cluster-51226.0|Cluster-60005.44868|Cluster-44001.0|Cluster-60005.85847|Cluster-49839.0|Cluster-60005.87738|Cluster-18638.0|Cluster-4776.0|Cluster-60005.4860|Cluster-60005.76128|Cluster-60005.55749|Cluster-60005.56526|Cluster-60005.60959|Cluster-60005.66858|Cluster-60005.28289|Cluster-60005.81678|Cluster-60005.105363|Cluster-60005.98372|…
KEGG	ko00440	Phosphonate and phosphinate metabolism	26|13055	71|37029	0.432551	0.943757	26	Cluster-13143.0|Cluster-60005.57611|Cluster-60005.104350|Cluster-60005.83101|Cluster-60005.76950|Cluster-60005.54061|Cluster-6894.0|Cluster-60005.105357|Cluster-69612.0|Cluster-60005.59204|Cluster-60005.96220|Cluster-34397.1|Cluster-60005.121882|Cluster-56635.0|Cluster-60005.10486|Cluster-8527.0|Cluster-60005.66064|Cluster-60005.92910|Cluster-60005.54470|Cluster-60005.54322|Cluster-60005.108974|C…
KEGG	ko04925	Aldosterone synthesis and secretion	79|13055	223|37029	0.436326	0.943757	79	Cluster-60005.60801|Cluster-5125.0|Cluster-60005.59187|Cluster-60005.71157|Cluster-60005.78456|Cluster-60005.76073|Cluster-60005.4110|Cluster-60005.100191|Cluster-60005.74233|Cluster-60005.112399|Cluster-68747.0|Cluster-60005.99811|Cluster-60005.39766|Cluster-60005.99666|Cluster-43076.0|Cluster-60005.79196|Cluster-60005.91691|Cluster-60005.12217|Cluster-60005.46966|Cluster-60005.94714|Cluster-600…
KEGG	ko04664	Fc epsilon RI signaling pathway	49|13055	137|37029	0.437836	0.943757	49	Cluster-60005.66858|Cluster-60005.84100|Cluster-60005.24549|Cluster-60005.40546|Cluster-60005.95049|Cluster-60005.103043|Cluster-60005.36669|Cluster-60005.2996|Cluster-60005.34188|Cluster-60005.105460|Cluster-8986.0|Cluster-60005.60745|Cluster-7910.0|Cluster-60005.114573|Cluster-8793.0|Cluster-60005.70177|Cluster-44001.0|Cluster-6541.0|Cluster-60005.41206|Cluster-60005.55788|Cluster-60005.87738|C…
KEGG	ko04710	Circadian rhythm	80|13055	226|37029	0.43801	0.943757	80	Cluster-60005.76716|Cluster-44143.0|Cluster-60005.97628|Cluster-60005.89539|Cluster-25038.0|Cluster-67648.0|Cluster-60005.38547|Cluster-60005.56944|Cluster-60005.81228|Cluster-60005.31622|Cluster-60005.40033|Cluster-60005.49208|Cluster-60005.91763|Cluster-3095.0|Cluster-60005.105632|Cluster-60005.57207|Cluster-60005.55774|Cluster-60005.119541|Cluster-60005.52250|Cluster-60005.61526|Cluster-60005.…
KEGG	ko05219	Bladder cancer	15|13055	40|37029	0.439803	0.943757	15	Cluster-60005.84100|Cluster-51449.0|Cluster-78061.0|Cluster-60005.41969|Cluster-60005.70177|Cluster-60005.40546|Cluster-60005.85604|Cluster-60005.79674|Cluster-60005.93816|Cluster-60005.22806|Cluster-60005.34188|Cluster-60005.42031|Cluster-60005.22137|Cluster-60005.66635|Cluster-60005.71192
KEGG	ko04660	T cell receptor signaling pathway	43|13055	120|37029	0.441263	0.943757	43	Cluster-60005.95149|Cluster-60005.84100|Cluster-67839.0|Cluster-60005.94929|Cluster-60005.105244|Cluster-60005.40546|Cluster-8810.0|Cluster-60005.102479|Cluster-60005.59914|Cluster-60005.50752|Cluster-60005.20219|Cluster-60005.91235|Cluster-28842.0|Cluster-60005.34188|Cluster-60005.34590|Cluster-7373.0|Cluster-60005.122746|Cluster-8793.0|Cluster-60005.124981|Cluster-60005.124982|Cluster-60005.701…
KEGG	ko01210	2-Oxocarboxylic acid metabolism	184|13055	526|37029	0.441853	0.943757	184	Cluster-24534.0|Cluster-60005.50200|Cluster-60005.53919|Cluster-60005.117179|Cluster-60005.48875|Cluster-60005.104179|Cluster-70233.0|Cluster-60005.54400|Cluster-60005.25917|Cluster-60005.54675|Cluster-10076.0|Cluster-60005.33364|Cluster-60005.79716|Cluster-60005.36791|Cluster-60005.29040|Cluster-60005.46827|Cluster-60005.71771|Cluster-60005.12128|Cluster-60005.108403|Cluster-60005.37136|Cluster-…
KEGG	ko04920	Adipocytokine signaling pathway	116|13055	330|37029	0.442718	0.943757	116	Cluster-80144.1|Cluster-44143.0|Cluster-60005.69014|Cluster-36828.0|Cluster-60005.59816|Cluster-60005.52250|Cluster-60005.29055|Cluster-60005.19956|Cluster-60005.104047|Cluster-60005.15817|Cluster-54663.0|Cluster-16586.0|Cluster-60005.70154|Cluster-9163.0|Cluster-60005.28372|Cluster-60005.119476|Cluster-60005.58788|Cluster-60005.99700|Cluster-64157.0|Cluster-60005.16020|Cluster-60005.16021|Cluste…
KEGG	ko04975	Fat digestion and absorption	53|13055	149|37029	0.446589	0.943757	53	Cluster-60005.23295|Cluster-60005.54958|Cluster-60005.68929|Cluster-60005.55382|Cluster-60005.29135|Cluster-60005.38623|Cluster-60005.22003|Cluster-60005.43435|Cluster-60005.12217|Cluster-60005.58919|Cluster-60005.98428|Cluster-60005.42022|Cluster-60005.63472|Cluster-60005.58818|Cluster-60005.54625|Cluster-60005.122169|Cluster-60005.49521|Cluster-60005.108815|Cluster-60005.98570|Cluster-60005.105…
KEGG	ko00332	Carbapenem biosynthesis	1|13055	1|37029	0.446728	0.943757	1	Cluster-60005.87424
KEGG	ko00624	Polycyclic aromatic hydrocarbon degradation	1|13055	1|37029	0.446728	0.943757	1	Cluster-60005.120191
KEGG	ko00621	Dioxin degradation	1|13055	1|37029	0.446728	0.943757	1	Cluster-60005.120191
KEGG	ko04075	Plant hormone signal transduction	86|13055	244|37029	0.447652	0.943757	86	Cluster-60005.51194|Cluster-8969.1|Cluster-60005.85086|Cluster-60005.50445|Cluster-60005.99373|Cluster-60005.87734|Cluster-60005.98013|Cluster-60005.40228|Cluster-60005.34901|Cluster-60005.43776|Cluster-60005.89798|Cluster-60005.53606|Cluster-60005.39464|Cluster-60005.35743|Cluster-60005.36949|Cluster-60005.51235|Cluster-60005.46885|Cluster-60005.106508|Cluster-60005.81547|Cluster-60005.47534|Clu…
KEGG	ko05214	Glioma	71|13055	201|37029	0.450183	0.943757	71	Cluster-60005.16021|Cluster-5125.0|Cluster-60005.66303|Cluster-60005.21893|Cluster-60005.10098|Cluster-60005.16854|Cluster-60005.40546|Cluster-60005.112399|Cluster-60005.58310|Cluster-60005.39766|Cluster-60005.99666|Cluster-81346.0|Cluster-60005.74335|Cluster-60005.85604|Cluster-7868.0|Cluster-60005.34188|Cluster-60005.119476|Cluster-60005.84100|Cluster-63766.0|Cluster-66359.0|Cluster-60005.40968…
KEGG	ko04620	Toll-like receptor signaling pathway	55|13055	155|37029	0.450689	0.943757	55	Cluster-60005.66858|Cluster-60005.84100|Cluster-60005.31085|Cluster-60005.40546|Cluster-60005.95049|Cluster-60005.103043|Cluster-60005.36669|Cluster-60005.2996|Cluster-7043.0|Cluster-60005.113653|Cluster-60005.34188|Cluster-60005.105460|Cluster-8986.0|Cluster-60005.60745|Cluster-7910.0|Cluster-60005.114573|Cluster-60005.70177|Cluster-44001.0|Cluster-60005.8472|Cluster-6541.0|Cluster-60005.41206|C…
KEGG	ko04141	Protein processing in endoplasmic reticulum	604|13055	1743|37029	0.455418	0.943757	604	Cluster-5283.0|Cluster-60005.51195|Cluster-62150.3|Cluster-60005.108194|Cluster-60005.82199|Cluster-60005.49333|Cluster-8308.0|Cluster-60005.46725|Cluster-60005.55043|Cluster-60005.57820|Cluster-63702.0|Cluster-60005.62467|Cluster-60005.18248|Cluster-8376.0|Cluster-60005.55568|Cluster-60005.99148|Cluster-60005.42920|Cluster-60005.119830|Cluster-60005.61164|Cluster-60005.61166|Cluster-76005.0|Clus…
KEGG	ko04923	Regulation of lipolysis in adipocytes	34|13055	95|37029	0.457107	0.943757	34	Cluster-60005.60801|Cluster-60005.86700|Cluster-60005.79196|Cluster-60005.44604|Cluster-26286.1|Cluster-60005.58587|Cluster-60005.72415|Cluster-60005.73936|Cluster-60005.58588|Cluster-60005.91691|Cluster-7711.0|Cluster-60005.73937|Cluster-60005.108747|Cluster-57386.0|Cluster-60005.43991|Cluster-60005.45132|Cluster-60005.28053|Cluster-60005.91739|Cluster-60005.14885|Cluster-60005.94954|Cluster-522…
KEGG	ko04670	Leukocyte transendothelial migration	42|13055	118|37029	0.457259	0.943757	42	Cluster-60005.63236|Cluster-60005.32824|Cluster-60005.95049|Cluster-60005.103043|Cluster-60005.36669|Cluster-60005.2996|Cluster-60005.16867|Cluster-60005.105460|Cluster-8986.0|Cluster-60005.60745|Cluster-7910.0|Cluster-60005.114573|Cluster-44001.0|Cluster-6541.0|Cluster-60005.87738|Cluster-60005.73013|Cluster-60005.88465|Cluster-60005.24665|Cluster-60005.71373|Cluster-60005.4860|Cluster-7043.0|Cl…
KEGG	ko04071	Sphingolipid signaling pathway	184|13055	528|37029	0.459397	0.943757	184	Cluster-60005.111869|Cluster-59244.0|Cluster-60005.40114|Cluster-60005.4940|Cluster-60005.42737|Cluster-60005.95436|Cluster-60005.52644|Cluster-60005.47636|Cluster-60005.34188|Cluster-60005.46720|Cluster-60005.26056|Cluster-60005.21419|Cluster-60005.124888|Cluster-60005.80679|Cluster-60005.46639|Cluster-60005.44521|Cluster-44001.0|Cluster-4831.0|Cluster-60005.87738|Cluster-60005.31388|Cluster-600…
KEGG	ko00520	Amino sugar and nucleotide sugar metabolism	214|13055	615|37029	0.461466	0.943757	214	Cluster-60005.65668|Cluster-60005.85528|Cluster-60005.57712|Cluster-60005.88885|Cluster-60005.29441|Cluster-60005.1870|Cluster-60005.39512|Cluster-60005.42434|Cluster-60005.45025|Cluster-60005.17274|Cluster-60005.40053|Cluster-60005.20273|Cluster-60005.30417|Cluster-60005.75556|Cluster-60005.5187|Cluster-60005.48464|Cluster-60005.32750|Cluster-60005.55270|Cluster-60005.86860|Cluster-60005.115838|…
KEGG	ko05211	Renal cell carcinoma	78|13055	222|37029	0.461608	0.943757	78	Cluster-60005.63798|Cluster-60005.66858|Cluster-60005.84100|Cluster-60005.91763|Cluster-60005.109909|Cluster-6317.0|Cluster-71259.0|Cluster-60005.40546|Cluster-60005.55915|Cluster-60005.95049|Cluster-60005.103043|Cluster-6541.0|Cluster-60005.69812|Cluster-3095.0|Cluster-7043.0|Cluster-60005.34188|Cluster-60005.105460|Cluster-7373.0|Cluster-8986.0|Cluster-60005.35342|Cluster-60005.85546|Cluster-79…
KEGG	ko05145	Toxoplasmosis	152|13055	436|37029	0.464173	0.943757	152	Cluster-60005.21272|Cluster-60005.58057|Cluster-60005.21486|Cluster-60005.75020|Cluster-60005.68850|Cluster-69885.0|Cluster-60005.66360|Cluster-60005.98402|Cluster-60005.34188|Cluster-60005.39613|Cluster-60005.31939|Cluster-60005.75310|Cluster-34706.0|Cluster-60005.8472|Cluster-60005.18248|Cluster-60005.69262|Cluster-60005.52174|Cluster-60005.58496|Cluster-60005.55788|Cluster-60005.51881|Cluster-…
KEGG	ko01220	Degradation of aromatic compounds	14|13055	38|37029	0.46704	0.943757	14	Cluster-60005.116063|Cluster-60005.65830|Cluster-60005.61722|Cluster-60005.86749|Cluster-60005.72494|Cluster-60005.50090|Cluster-60005.120191|Cluster-60005.66008|Cluster-47141.0|Cluster-4397.0|Cluster-11265.0|Cluster-9291.0|Cluster-60005.9022|Cluster-60005.67939
KEGG	ko00643	Styrene degradation	14|13055	38|37029	0.46704	0.943757	14	Cluster-60005.86452|Cluster-67245.0|Cluster-60005.44913|Cluster-57448.0|Cluster-11828.0|Cluster-60005.81786|Cluster-60005.52479|Cluster-60005.77448|Cluster-60005.26737|Cluster-63053.0|Cluster-60005.100645|Cluster-60005.77163|Cluster-10263.0|Cluster-60005.101476
KEGG	ko04623	Cytosolic DNA-sensing pathway	74|13055	211|37029	0.469102	0.943757	74	Cluster-60005.52013|Cluster-60005.63293|Cluster-60005.118456|Cluster-32580.0|Cluster-60005.44279|Cluster-60005.95005|Cluster-55939.0|Cluster-81154.0|Cluster-60005.79473|Cluster-60005.65910|Cluster-60005.69342|Cluster-60005.22368|Cluster-43613.0|Cluster-60005.38074|Cluster-60005.48031|Cluster-60005.38071|Cluster-4396.0|Cluster-60005.55065|Cluster-60005.46390|Cluster-8982.0|Cluster-54280.0|Cluster-…
KEGG	ko00020	Citrate cycle (TCA cycle)	242|13055	697|37029	0.469121	0.943757	242	Cluster-24534.0|Cluster-60005.69346|Cluster-60005.50200|Cluster-60005.38829|Cluster-60005.78012|Cluster-60005.43255|Cluster-60005.18927|Cluster-60005.62584|Cluster-60005.38740|Cluster-60005.26051|Cluster-60005.65817|Cluster-60005.54675|Cluster-10076.0|Cluster-60005.116169|Cluster-60005.114969|Cluster-60005.52392|Cluster-60005.102890|Cluster-60005.61228|Cluster-60005.41334|Cluster-60005.76437|Clus…
KEGG	ko00564	Glycerophospholipid metabolism	196|13055	564|37029	0.470513	0.943757	196	Cluster-60005.38350|Cluster-60005.111869|Cluster-36693.0|Cluster-60005.43311|Cluster-60005.79883|Cluster-32281.0|Cluster-60005.42737|Cluster-60005.74706|Cluster-60005.83101|Cluster-60005.54061|Cluster-60005.76834|Cluster-60005.48586|Cluster-8527.0|Cluster-60005.86382|Cluster-60005.29806|Cluster-60005.87718|Cluster-60005.86608|Cluster-60005.96220|Cluster-60005.94091|Cluster-60005.98921|Cluster-343…
KEGG	ko00720	Carbon fixation pathways in prokaryotes	142|13055	408|37029	0.473298	0.943757	142	Cluster-24534.0|Cluster-60005.50200|Cluster-60005.98734|Cluster-60005.75651|Cluster-60005.45233|Cluster-60005.62584|Cluster-60005.70810|Cluster-60005.49293|Cluster-60005.19827|Cluster-60005.39411|Cluster-60005.76437|Cluster-60005.64239|Cluster-60005.70728|Cluster-60005.17299|Cluster-60005.42928|Cluster-60005.72034|Cluster-5736.0|Cluster-60005.46080|Cluster-60005.46083|Cluster-60005.50874|Cluster-…
KEGG	ko00220	Arginine biosynthesis	103|13055	296|37029	0.4832	0.943757	103	Cluster-60005.83061|Cluster-60005.58050|Cluster-62169.0|Cluster-44249.0|Cluster-60005.14518|Cluster-48636.0|Cluster-60005.54400|Cluster-60005.25917|Cluster-60005.33364|Cluster-60005.48183|Cluster-60005.46827|Cluster-60005.57650|Cluster-44997.0|Cluster-60005.55009|Cluster-60005.52037|Cluster-60005.45504|Cluster-60005.25229|Cluster-60005.46415|Cluster-60005.48003|Cluster-60005.100417|Cluster-60005.…
KEGG	ko04011	MAPK signaling pathway - yeast	110|13055	317|37029	0.491419	0.943757	110	Cluster-60005.109973|Cluster-60005.47854|Cluster-60005.67770|Cluster-60005.61833|Cluster-60005.66361|Cluster-60005.34188|Cluster-60005.72606|Cluster-60005.71385|Cluster-60005.49696|Cluster-60005.95838|Cluster-60005.88798|Cluster-60005.46986|Cluster-60005.100538|Cluster-60005.87782|Cluster-60005.52249|Cluster-60005.99209|Cluster-60005.49687|Cluster-60005.40832|Cluster-60005.84677|Cluster-60005.228…
KEGG	ko04973	Carbohydrate digestion and absorption	62|13055	178|37029	0.494161	0.943757	62	Cluster-4025.0|Cluster-60005.102924|Cluster-60005.10715|Cluster-60005.64209|Cluster-60005.42491|Cluster-60005.2185|Cluster-60005.12311|Cluster-60005.28991|Cluster-60005.98741|Cluster-60005.40053|Cluster-60005.60584|Cluster-60005.62943|Cluster-60005.54416|Cluster-60005.23368|Cluster-60005.117824|Cluster-60005.80578|Cluster-60005.81747|Cluster-60005.14893|Cluster-60005.62196|Cluster-60005.28291|Clu…
KEGG	ko04978	Mineral absorption	42|13055	120|37029	0.494193	0.943757	42	Cluster-60005.12989|Cluster-60005.81036|Cluster-63059.0|Cluster-55466.0|Cluster-60005.98741|Cluster-60005.68982|Cluster-60005.52575|Cluster-60005.105036|Cluster-60005.123144|Cluster-60005.28291|Cluster-60005.89031|Cluster-60005.94219|Cluster-60005.108287|Cluster-60005.111144|Cluster-60005.111146|Cluster-60005.111147|Cluster-60005.56526|Cluster-60005.5102|Cluster-60005.14893|Cluster-60005.50722|Cl…
KEGG	ko00785	Lipoic acid metabolism	13|13055	36|37029	0.496127	0.943757	13	Cluster-60005.70020|Cluster-71860.1|Cluster-60005.31677|Cluster-60005.45048|Cluster-39270.0|Cluster-60005.46249|Cluster-47859.0|Cluster-60005.37175|Cluster-60005.22670|Cluster-60005.42981|Cluster-60005.95625|Cluster-34149.0|Cluster-60005.12056
KEGG	ko04977	Vitamin digestion and absorption	23|13055	65|37029	0.496273	0.943757	23	Cluster-60005.38623|Cluster-32869.0|Cluster-60005.30533|Cluster-60005.65418|Cluster-6840.0|Cluster-60005.12217|Cluster-60005.35346|Cluster-60005.58818|Cluster-60005.117433|Cluster-60005.46639|Cluster-60005.114625|Cluster-60005.31388|Cluster-60005.94919|Cluster-60005.58534|Cluster-60005.29024|Cluster-6068.0|Cluster-76895.0|Cluster-60005.55105|Cluster-60005.55747|Cluster-60005.68191|Cluster-60005.3…
KEGG	ko05213	Endometrial cancer	34|13055	97|37029	0.498209	0.943757	34	Cluster-60005.52845|Cluster-60005.84100|Cluster-67839.0|Cluster-60005.24549|Cluster-60005.16854|Cluster-60005.40546|Cluster-28842.0|Cluster-60005.74335|Cluster-60005.50752|Cluster-60005.91235|Cluster-7868.0|Cluster-60005.34188|Cluster-71287.0|Cluster-60005.60098|Cluster-8793.0|Cluster-60005.76292|Cluster-60005.124982|Cluster-60005.70177|Cluster-60005.11802|Cluster-60005.38975|Cluster-60005.50347|…
KEGG	ko03320	PPAR signaling pathway	159|13055	460|37029	0.499727	0.943757	159	Cluster-60005.57550|Cluster-60005.34216|Cluster-80144.1|Cluster-60005.71420|Cluster-60005.92335|Cluster-76534.0|Cluster-60005.60062|Cluster-60005.29055|Cluster-60005.29056|Cluster-60005.19956|Cluster-60005.34137|Cluster-60005.15817|Cluster-81291.0|Cluster-60005.47450|Cluster-54663.0|Cluster-60005.70154|Cluster-9163.0|Cluster-60005.99700|Cluster-64157.0|Cluster-60005.95178|Cluster-60005.61941|Clus…
KEGG	ko05166	HTLV-I infection	255|13055	739|37029	0.501729	0.943757	255	Cluster-60005.95149|Cluster-67839.0|Cluster-60005.47109|Cluster-60005.10136|Cluster-60005.68709|Cluster-70623.1|Cluster-60005.108249|Cluster-60005.30557|Cluster-6821.2|Cluster-60005.42734|Cluster-60005.56156|Cluster-60005.114059|Cluster-43189.0|Cluster-60005.67205|Cluster-60005.66076|Cluster-60005.77923|Cluster-60005.34590|Cluster-60005.28835|Cluster-60005.122746|Cluster-61390.0|Cluster-60005.486…
KEGG	ko04010	MAPK signaling pathway	153|13055	443|37029	0.503778	0.943757	153	Cluster-60005.95149|Cluster-60005.105244|Cluster-60005.58057|Cluster-60005.21486|Cluster-60005.68850|Cluster-60005.79196|Cluster-69885.0|Cluster-60005.99075|Cluster-60005.34188|Cluster-60005.34590|Cluster-60005.122746|Cluster-60005.31939|Cluster-44001.0|Cluster-60005.8472|Cluster-60005.18248|Cluster-60005.102918|Cluster-60005.87738|Cluster-60005.92436|Cluster-60005.56008|Cluster-60005.64463|Clust…
KEGG	ko00073	Cutin, suberine and wax biosynthesis	16|13055	45|37029	0.505225	0.943757	16	Cluster-60005.29203|Cluster-15561.0|Cluster-60005.36447|Cluster-60005.48885|Cluster-60005.52189|Cluster-60005.50777|Cluster-60005.67710|Cluster-60005.95664|Cluster-27100.0|Cluster-60005.101181|Cluster-60005.32475|Cluster-60005.58259|Cluster-60005.27365|Cluster-60005.59296|Cluster-60005.27366|Cluster-60005.38209
KEGG	ko00604	Glycosphingolipid biosynthesis - ganglio series	16|13055	45|37029	0.505225	0.943757	16	Cluster-60005.114960|Cluster-60005.106763|Cluster-60005.92797|Cluster-60005.13292|Cluster-60005.1870|Cluster-52236.0|Cluster-4771.0|Cluster-60005.108756|Cluster-57032.0|Cluster-60005.108757|Cluster-70478.0|Cluster-50817.0|Cluster-60005.20273|Cluster-60005.99129|Cluster-60005.73790|Cluster-60005.42860
KEGG	ko01522	Endocrine resistance	60|13055	173|37029	0.506469	0.943757	60	Cluster-73550.0|Cluster-43025.0|Cluster-60005.66303|Cluster-60005.21893|Cluster-60005.10098|Cluster-21601.0|Cluster-60005.31567|Cluster-60005.40546|Cluster-60005.84100|Cluster-60005.58310|Cluster-77991.0|Cluster-60005.79196|Cluster-60005.50879|Cluster-60005.64991|Cluster-60005.34188|Cluster-60005.119476|Cluster-60005.97644|Cluster-60005.27289|Cluster-60005.122021|Cluster-60005.74163|Cluster-60005…
KEGG	ko00627	Aminobenzoate degradation	6|13055	16|37029	0.510143	0.943757	6	Cluster-60005.114784|Cluster-60005.13689|Cluster-60005.48470|Cluster-39522.0|Cluster-9303.0|Cluster-69392.0
KEGG	ko00524	Neomycin, kanamycin and gentamicin biosynthesis	6|13055	16|37029	0.510143	0.943757	6	Cluster-60005.20427|Cluster-60005.81747|Cluster-60005.103838|Cluster-60005.25219|Cluster-60005.108644|Cluster-60005.40053
KEGG	ko05223	Non-small cell lung cancer	20|13055	57|37029	0.514971	0.943757	20	Cluster-60005.75266|Cluster-60005.84100|Cluster-8793.0|Cluster-60005.70177|Cluster-59468.0|Cluster-60005.24549|Cluster-60005.41969|Cluster-51449.0|Cluster-60005.40546|Cluster-36992.0|Cluster-78061.0|Cluster-60005.85604|Cluster-60005.34188|Cluster-60005.22806|Cluster-60005.55788|Cluster-60005.42031|Cluster-60005.18447|Cluster-60005.23055|Cluster-60005.22137|Cluster-60005.93816
KEGG	ko05205	Proteoglycans in cancer	167|13055	485|37029	0.516048	0.943757	167	Cluster-43025.0|Cluster-60005.62465|Cluster-60005.59182|Cluster-60005.27055|Cluster-60005.51193|Cluster-60005.45721|Cluster-60005.49895|Cluster-77991.0|Cluster-60005.43398|Cluster-60005.34188|Cluster-60005.119855|Cluster-44001.0|Cluster-60005.122021|Cluster-60005.48184|Cluster-60005.87738|Cluster-60005.119476|Cluster-70569.0|Cluster-57813.0|Cluster-60005.16020|Cluster-60005.16021|Cluster-60005.61…
KEGG	ko04340	Hedgehog signaling pathway	57|13055	165|37029	0.517809	0.943757	57	Cluster-60005.68628|Cluster-67839.0|Cluster-60005.74988|Cluster-60005.47584|Cluster-60005.50565|Cluster-60005.51259|Cluster-60005.38547|Cluster-6374.0|Cluster-28842.0|Cluster-60005.49208|Cluster-9722.0|Cluster-60005.50752|Cluster-60005.91691|Cluster-60005.91235|Cluster-60005.62610|Cluster-60005.96798|Cluster-60005.100860|Cluster-60005.22424|Cluster-60005.124982|Cluster-60005.36445|Cluster-60005.7…
KEGG	ko00360	Phenylalanine metabolism	58|13055	168|37029	0.519156	0.943757	58	Cluster-60005.34966|Cluster-60005.108033|Cluster-42638.0|Cluster-28211.0|Cluster-60005.107935|Cluster-53420.0|Cluster-4639.0|Cluster-60005.11724|Cluster-60005.62863|Cluster-60005.58954|Cluster-60005.107247|Cluster-60005.89656|Cluster-60005.37313|Cluster-60005.66633|Cluster-60005.74056|Cluster-60005.98369|Cluster-60005.74024|Cluster-60005.95749|Cluster-60005.117700|Cluster-60005.112281|Cluster-953…
KEGG	ko05142	Chagas disease (American trypanosomiasis)	60|13055	174|37029	0.521783	0.943757	60	Cluster-60005.27608|Cluster-60005.58073|Cluster-59244.0|Cluster-60005.21454|Cluster-60005.87870|Cluster-60005.40546|Cluster-60005.95436|Cluster-60005.52644|Cluster-60005.113653|Cluster-68918.0|Cluster-60005.3190|Cluster-60005.44967|Cluster-60005.34188|Cluster-60005.47501|Cluster-60005.53776|Cluster-60005.47059|Cluster-60005.56885|Cluster-60005.34089|Cluster-60005.8104|Cluster-60005.71647|Cluster-…
KEGG	ko05202	Transcriptional misregulation in cancer	98|13055	285|37029	0.525025	0.943757	98	Cluster-60005.62465|Cluster-60005.121035|Cluster-60005.69473|Cluster-60005.27055|Cluster-60005.51193|Cluster-60005.74092|Cluster-60005.23714|Cluster-60005.43398|Cluster-66538.0|Cluster-60005.91544|Cluster-60005.97644|Cluster-60005.20275|Cluster-60005.51683|Cluster-60005.70252|Cluster-60005.48184|Cluster-60005.54613|Cluster-55561.0|Cluster-60005.54663|Cluster-60005.49764|Cluster-60005.59506|Cluste…
KEGG	ko04072	Phospholipase D signaling pathway	111|13055	323|37029	0.526377	0.943757	111	Cluster-60005.111869|Cluster-60005.79883|Cluster-60005.42737|Cluster-81886.0|Cluster-60005.16771|Cluster-60005.34188|Cluster-60005.64415|Cluster-60005.64413|Cluster-60005.39199|Cluster-60005.75384|Cluster-57102.0|Cluster-60005.119476|Cluster-60005.100538|Cluster-60005.16020|Cluster-60005.16021|Cluster-60005.97154|Cluster-60005.71865|Cluster-60005.71864|Cluster-57813.0|Cluster-60005.40832|Cluster-…
KEGG	ko00600	Sphingolipid metabolism	100|13055	291|37029	0.527057	0.943757	100	Cluster-60005.106763|Cluster-37478.0|Cluster-60005.71425|Cluster-81886.0|Cluster-60005.104679|Cluster-60005.46720|Cluster-60005.26056|Cluster-60005.21419|Cluster-60005.124888|Cluster-60005.13292|Cluster-6458.0|Cluster-60005.73597|Cluster-36523.0|Cluster-60005.73598|Cluster-60005.62887|Cluster-60005.62882|Cluster-60005.45627|Cluster-60005.84448|Cluster-60005.58271|Cluster-60005.91883|Cluster-60005…
KEGG	ko04341	Hedgehog signaling pathway - fly	78|13055	227|37029	0.528975	0.943757	78	Cluster-60005.68628|Cluster-67839.0|Cluster-25038.0|Cluster-60005.50565|Cluster-60005.51259|Cluster-60005.38547|Cluster-60005.55026|Cluster-60005.45132|Cluster-6374.0|Cluster-28842.0|Cluster-60005.29112|Cluster-9722.0|Cluster-60005.50752|Cluster-60005.91691|Cluster-7512.0|Cluster-60005.91235|Cluster-60005.62610|Cluster-60005.61526|Cluster-60005.96798|Cluster-60005.100860|Cluster-60005.35342|Clust…
KEGG	ko04971	Gastric acid secretion	55|13055	160|37029	0.530992	0.943757	55	Cluster-5125.0|Cluster-60005.79196|Cluster-43849.0|Cluster-60005.112399|Cluster-68747.0|Cluster-60005.39766|Cluster-60005.99666|Cluster-81346.0|Cluster-60005.98741|Cluster-66359.0|Cluster-60005.40968|Cluster-66452.0|Cluster-60005.21513|Cluster-75025.0|Cluster-60005.4110|Cluster-60005.28291|Cluster-60005.71157|Cluster-60005.32476|Cluster-60005.76997|Cluster-57386.0|Cluster-60005.94702|Cluster-6000…
KEGG	ko04915	Estrogen signaling pathway	149|13055	435|37029	0.53893	0.943757	149	Cluster-30157.0|Cluster-60005.38357|Cluster-60005.14457|Cluster-60005.58057|Cluster-60005.83100|Cluster-60005.21486|Cluster-81346.0|Cluster-60005.79196|Cluster-69885.0|Cluster-60005.63320|Cluster-60005.97854|Cluster-60005.34188|Cluster-66359.0|Cluster-60005.31939|Cluster-60005.99666|Cluster-43849.0|Cluster-60005.26868|Cluster-60005.91797|Cluster-60005.18248|Cluster-60005.32476|Cluster-60005.72716…
KEGG	ko04210	Apoptosis	113|13055	330|37029	0.53939	0.943757	113	Cluster-60005.44605|Cluster-60005.85727|Cluster-60005.16630|Cluster-60005.23714|Cluster-60005.66360|Cluster-60005.34188|Cluster-60005.83478|Cluster-60005.59182|Cluster-38068.0|Cluster-60005.98920|Cluster-60005.61491|Cluster-60005.33304|Cluster-6642.0|Cluster-60005.61164|Cluster-60005.61166|Cluster-60005.54052|Cluster-60005.46492|Cluster-60005.51581|Cluster-60005.2114|Cluster-60005.69767|Cluster-5…
KEGG	ko04742	Taste transduction	49|13055	143|37029	0.539901	0.943757	49	Cluster-4025.0|Cluster-60005.102924|Cluster-60005.10715|Cluster-60005.42491|Cluster-60005.77009|Cluster-60005.74456|Cluster-60005.2185|Cluster-80756.0|Cluster-60005.47485|Cluster-60005.43741|Cluster-60005.79196|Cluster-60005.91691|Cluster-60005.37178|Cluster-60005.44149|Cluster-60005.23368|Cluster-52298.0|Cluster-60005.80578|Cluster-60005.81956|Cluster-60005.107080|Cluster-60005.89081|Cluster-600…
KEGG	ko04911	Insulin secretion	26|13055	76|37029	0.549612	0.943757	26	Cluster-60005.79196|Cluster-60005.62581|Cluster-60005.98741|Cluster-60005.64075|Cluster-60005.69739|Cluster-60005.71485|Cluster-60005.28291|Cluster-57386.0|Cluster-60005.56526|Cluster-60005.14893|Cluster-60005.50722|Cluster-60005.45132|Cluster-52298.0|Cluster-71412.0|Cluster-60005.83158|Cluster-60005.55749|Cluster-60005.21473|Cluster-60005.60959|Cluster-60005.91691|Cluster-60005.71390|Cluster-600…
KEGG	ko04720	Long-term potentiation	88|13055	258|37029	0.551917	0.943757	88	Cluster-60005.95149|Cluster-60005.105244|Cluster-5125.0|Cluster-60005.49895|Cluster-81346.0|Cluster-60005.34059|Cluster-60005.34188|Cluster-60005.34590|Cluster-60005.122746|Cluster-66359.0|Cluster-60005.99666|Cluster-60005.4110|Cluster-60005.32476|Cluster-60005.55680|Cluster-60005.45821|Cluster-78564.0|Cluster-60005.64463|Cluster-60005.56007|Cluster-68747.0|Cluster-60005.78311|Cluster-60005.98370…
KEGG	ko00460	Cyanoamino acid metabolism	48|13055	141|37029	0.555555	0.943757	48	Cluster-60005.75067|Cluster-60005.24806|Cluster-60005.76631|Cluster-60005.56407|Cluster-60005.32890|Cluster-60005.78169|Cluster-60467.0|Cluster-57786.0|Cluster-60005.78020|Cluster-60005.68153|Cluster-4907.1|Cluster-4907.0|Cluster-60005.61557|Cluster-60005.47308|Cluster-60005.99474|Cluster-60005.65428|Cluster-60005.47307|Cluster-60005.47244|Cluster-60005.56545|Cluster-60005.33026|Cluster-60005.653…
KEGG	ko05215	Prostate cancer	108|13055	317|37029	0.557399	0.943757	108	Cluster-67839.0|Cluster-30157.0|Cluster-60005.38357|Cluster-60005.82199|Cluster-60005.37937|Cluster-60005.97854|Cluster-60005.34188|Cluster-60005.60558|Cluster-60005.50347|Cluster-60005.31381|Cluster-4831.0|Cluster-60005.119476|Cluster-60005.99148|Cluster-60005.16020|Cluster-10244.0|Cluster-60005.44052|Cluster-60005.36891|Cluster-57813.0|Cluster-60005.51118|Cluster-63766.0|Cluster-60005.22806|Clu…
KEGG	ko04152	AMPK signaling pathway	312|13055	913|37029	0.5587	0.943757	312	Cluster-53237.0|Cluster-60005.26514|Cluster-43025.0|Cluster-60005.62068|Cluster-59244.0|Cluster-60005.95191|Cluster-44143.0|Cluster-60005.43596|Cluster-60005.63691|Cluster-60005.31622|Cluster-60005.52644|Cluster-36828.0|Cluster-60005.68852|Cluster-77991.0|Cluster-60005.47636|Cluster-51226.0|Cluster-60005.25839|Cluster-60005.42455|Cluster-60005.38053|Cluster-60005.52250|Cluster-60005.64415|Cluster…
KEGG	ko00361	Chlorocyclohexane and chlorobenzene degradation	6|13055	17|37029	0.558762	0.943757	6	Cluster-60005.109085|Cluster-52401.0|Cluster-60005.98411|Cluster-60005.49987|Cluster-60005.116852|Cluster-7261.0
KEGG	ko00623	Toluene degradation	6|13055	17|37029	0.558762	0.943757	6	Cluster-60005.109085|Cluster-52401.0|Cluster-60005.98411|Cluster-60005.49987|Cluster-60005.116852|Cluster-7261.0
KEGG	ko00364	Fluorobenzoate degradation	6|13055	17|37029	0.558762	0.943757	6	Cluster-60005.109085|Cluster-52401.0|Cluster-60005.98411|Cluster-60005.49987|Cluster-60005.116852|Cluster-7261.0
KEGG	ko00730	Thiamine metabolism	35|13055	103|37029	0.55992	0.943757	35	Cluster-60005.45630|Cluster-60005.81226|Cluster-60005.30490|Cluster-60005.45699|Cluster-60005.39064|Cluster-60005.63026|Cluster-76112.0|Cluster-60005.59913|Cluster-60005.79133|Cluster-60005.19135|Cluster-60005.26335|Cluster-60005.46717|Cluster-60005.100576|Cluster-60005.70018|Cluster-60005.67282|Cluster-60005.28534|Cluster-69095.1|Cluster-60005.70017|Cluster-60005.39052|Cluster-60005.15334|Cluste…
KEGG	ko00680	Methane metabolism	155|13055	455|37029	0.562488	0.943757	155	Cluster-60005.34382|Cluster-60005.53536|Cluster-60005.51604|Cluster-60005.45233|Cluster-60005.101599|Cluster-60005.42591|Cluster-60005.22243|Cluster-60005.99265|Cluster-60005.67939|Cluster-9291.0|Cluster-60005.35477|Cluster-60005.56545|Cluster-60005.67839|Cluster-60005.63612|Cluster-60005.66008|Cluster-60005.121172|Cluster-60005.114585|Cluster-60005.51342|Cluster-60005.53527|Cluster-60005.46080|C…
KEGG	ko00523	Polyketide sugar unit biosynthesis	3|13055	8|37029	0.563775	0.943757	3	Cluster-60005.65668|Cluster-60005.120911|Cluster-60005.72403
KEGG	ko05410	Hypertrophic cardiomyopathy (HCM)	43|13055	127|37029	0.567787	0.943757	43	Cluster-60005.76716|Cluster-60005.57207|Cluster-60005.73051|Cluster-44143.0|Cluster-60005.56944|Cluster-60005.81228|Cluster-60005.31622|Cluster-60005.59816|Cluster-60005.55774|Cluster-60005.52250|Cluster-60005.55674|Cluster-60005.78330|Cluster-67648.0|Cluster-7422.0|Cluster-60005.69962|Cluster-16586.0|Cluster-60005.125508|Cluster-60005.43112|Cluster-60005.56721|Cluster-26302.0|Cluster-8439.0|Clus…
KEGG	ko00350	Tyrosine metabolism	78|13055	230|37029	0.568717	0.943757	78	Cluster-67245.0|Cluster-60005.34966|Cluster-60005.108033|Cluster-60005.110495|Cluster-28211.0|Cluster-60005.107935|Cluster-53420.0|Cluster-4639.0|Cluster-60005.11724|Cluster-60005.95749|Cluster-60005.56889|Cluster-60005.62863|Cluster-60005.58954|Cluster-60005.26737|Cluster-60005.107247|Cluster-60005.77163|Cluster-60005.44913|Cluster-60005.74056|Cluster-60005.67939|Cluster-60005.98369|Cluster-6041…
KEGG	ko04668	TNF signaling pathway	29|13055	86|37029	0.574713	0.943757	29	Cluster-60005.52178|Cluster-58364.0|Cluster-60005.85356|Cluster-60005.3252|Cluster-60005.68923|Cluster-60005.40546|Cluster-60005.84100|Cluster-60005.68925|Cluster-60005.23743|Cluster-4735.1|Cluster-60005.95040|Cluster-60005.34188|Cluster-60005.70177|Cluster-60005.71485|Cluster-60005.8472|Cluster-60005.55403|Cluster-60005.24472|Cluster-60005.62322|Cluster-60005.55729|Cluster-60005.42031|Cluster-60…
KEGG	ko04392	Hippo signaling pathway -multiple species	31|13055	92|37029	0.576292	0.943757	31	Cluster-45833.0|Cluster-60005.64432|Cluster-60005.26417|Cluster-60005.46763|Cluster-60005.105632|Cluster-60005.20515|Cluster-7373.0|Cluster-17420.0|Cluster-60005.49696|Cluster-60005.24884|Cluster-6271.0|Cluster-49256.0|Cluster-60005.48521|Cluster-60005.46986|Cluster-60005.39681|Cluster-60005.31439|Cluster-60005.75647|Cluster-60005.70062|Cluster-60005.19854|Cluster-60005.35282|Cluster-31418.0|Clus…
KEGG	ko00960	Tropane, piperidine and pyridine alkaloid biosynthesis	36|13055	107|37029	0.580137	0.943757	36	Cluster-60005.69655|Cluster-60005.34966|Cluster-60005.108033|Cluster-60005.94270|Cluster-53420.0|Cluster-60005.11724|Cluster-60005.62863|Cluster-60005.58954|Cluster-60005.107247|Cluster-60005.89656|Cluster-60005.95749|Cluster-60005.53919|Cluster-60005.112281|Cluster-60005.71771|Cluster-60005.29506|Cluster-60005.25277|Cluster-60005.103449|Cluster-60005.25229|Cluster-60005.69869|Cluster-27493.0|Clu…
KEGG	ko00261	Monobactam biosynthesis	42|13055	125|37029	0.584558	0.943757	42	Cluster-60005.11784|Cluster-60005.11783|Cluster-60005.27527|Cluster-60005.44239|Cluster-57635.0|Cluster-37438.0|Cluster-60005.66015|Cluster-60005.56589|Cluster-60005.45140|Cluster-60005.58607|Cluster-60005.51035|Cluster-60005.55232|Cluster-29286.0|Cluster-60005.55467|Cluster-60005.56528|Cluster-60005.48189|Cluster-60005.43073|Cluster-60005.41816|Cluster-60005.66013|Cluster-20936.0|Cluster-60005.8…
KEGG	ko00120	Primary bile acid biosynthesis	1|13055	2|37029	0.588466	0.943757	1	Cluster-60005.82311
KEGG	ko00232	Caffeine metabolism	18|13055	54|37029	0.592541	0.943757	18	Cluster-60005.27456|Cluster-60005.93937|Cluster-60005.41934|Cluster-60005.38236|Cluster-60005.43516|Cluster-60005.29497|Cluster-60005.29500|Cluster-60005.27646|Cluster-60005.33614|Cluster-60005.38237|Cluster-60005.58579|Cluster-60005.98351|Cluster-60005.125024|Cluster-60005.75792|Cluster-60005.79026|Cluster-60005.111009|Cluster-60005.124902|Cluster-7922.0
KEGG	ko04917	Prolactin signaling pathway	19|13055	57|37029	0.592649	0.943757	19	Cluster-60005.84100|Cluster-67839.0|Cluster-60005.34188|Cluster-60005.124981|Cluster-60005.124982|Cluster-60005.70177|Cluster-60005.41969|Cluster-60005.40546|Cluster-60005.83047|Cluster-60005.79674|Cluster-60005.47197|Cluster-60005.50752|Cluster-60005.22806|Cluster-60005.91235|Cluster-28842.0|Cluster-60005.42031|Cluster-60005.71192|Cluster-60005.66635|Cluster-60005.31381
KEGG	ko00920	Sulfur metabolism	95|13055	282|37029	0.593584	0.943757	95	Cluster-25900.0|Cluster-60005.52009|Cluster-60005.57493|Cluster-60005.66360|Cluster-60005.115745|Cluster-6640.0|Cluster-60005.33193|Cluster-60005.48189|Cluster-60005.41816|Cluster-60005.33194|Cluster-60005.27618|Cluster-60005.34989|Cluster-60005.37098|Cluster-60005.37099|Cluster-60005.64178|Cluster-60005.39462|Cluster-60005.47925|Cluster-60005.65060|Cluster-60005.69211|Cluster-60005.121252|Cluste…
KEGG	ko00513	Various types of N-glycan biosynthesis	79|13055	235|37029	0.595346	0.943757	79	Cluster-60005.35083|Cluster-60005.93929|Cluster-40855.0|Cluster-60005.64491|Cluster-60005.67496|Cluster-60005.100009|Cluster-60005.75740|Cluster-60005.61537|Cluster-60005.39309|Cluster-60005.73197|Cluster-60005.57015|Cluster-27881.0|Cluster-60005.112769|Cluster-60005.83660|Cluster-8308.0|Cluster-60005.21659|Cluster-60005.24064|Cluster-60005.120309|Cluster-60005.36476|Cluster-60005.40210|Cluster-6…
KEGG	ko05030	Cocaine addiction	10|13055	30|37029	0.595677	0.943757	10	Cluster-60005.45132|Cluster-60005.71390|Cluster-60005.72716|Cluster-60005.69739|Cluster-52298.0|Cluster-28211.0|Cluster-60005.79196|Cluster-57386.0|Cluster-60005.71485|Cluster-60005.91691
KEGG	ko04940	Type I diabetes mellitus	29|13055	87|37029	0.5958	0.943757	29	Cluster-60005.58739|Cluster-64110.0|Cluster-60005.62745|Cluster-60005.20482|Cluster-60005.47918|Cluster-60005.47030|Cluster-60005.48083|Cluster-60005.105359|Cluster-60005.72931|Cluster-60005.96878|Cluster-60005.72658|Cluster-60005.97409|Cluster-60005.59233|Cluster-13736.0|Cluster-60005.4612|Cluster-60005.29387|Cluster-60005.84428|Cluster-60005.50474|Cluster-60005.40223|Cluster-60005.63685|Cluster…
KEGG	ko04711	Circadian rhythm - fly	9|13055	27|37029	0.597083	0.943757	9	Cluster-67839.0|Cluster-60005.124981|Cluster-60005.124982|Cluster-60005.47197|Cluster-60005.50752|Cluster-60005.31381|Cluster-60005.91235|Cluster-28842.0|Cluster-60005.105632
KEGG	ko00250	Alanine, aspartate and glutamate metabolism	186|13055	550|37029	0.599495	0.943757	186	Cluster-60005.43098|Cluster-35280.0|Cluster-64110.0|Cluster-62169.0|Cluster-60005.45431|Cluster-60005.67777|Cluster-60005.34832|Cluster-60005.36373|Cluster-60005.77744|Cluster-44249.0|Cluster-60005.39340|Cluster-60005.14518|Cluster-60005.37731|Cluster-60005.101599|Cluster-32400.0|Cluster-60005.43497|Cluster-60005.5187|Cluster-60005.36522|Cluster-60005.48183|Cluster-60005.117660|Cluster-60005.6783…
KEGG	ko00626	Naphthalene degradation	7|13055	21|37029	0.601501	0.943757	7	Cluster-60005.66008|Cluster-60005.61722|Cluster-60005.72494|Cluster-60005.120191|Cluster-47141.0|Cluster-9291.0|Cluster-60005.67939
KEGG	ko05231	Choline metabolism in cancer	162|13055	480|37029	0.603495	0.943757	162	Cluster-43025.0|Cluster-60005.79883|Cluster-60005.56262|Cluster-60005.42737|Cluster-60005.111869|Cluster-77991.0|Cluster-63744.0|Cluster-60005.34188|Cluster-60005.64415|Cluster-60005.64413|Cluster-60005.24549|Cluster-44001.0|Cluster-60005.21893|Cluster-60005.122021|Cluster-60005.120749|Cluster-60005.87738|Cluster-60005.119476|Cluster-60005.100538|Cluster-60005.16020|Cluster-52489.1|Cluster-55307.…
KEGG	ko00052	Galactose metabolism	93|13055	277|37029	0.604034	0.943757	93	Cluster-60005.106763|Cluster-60005.42434|Cluster-60005.85528|Cluster-60005.40053|Cluster-60005.22243|Cluster-60005.108644|Cluster-60005.68661|Cluster-60005.114585|Cluster-60005.13292|Cluster-60005.40102|Cluster-60005.48241|Cluster-60005.49175|Cluster-60005.53604|Cluster-27353.0|Cluster-60005.97553|Cluster-35511.0|Cluster-60005.73695|Cluster-60005.67715|Cluster-60005.91883|Cluster-60005.83047|Clus…
KEGG	ko05033	Nicotine addiction	6|13055	18|37029	0.604972	0.943757	6	Cluster-60005.8442|Cluster-60005.116673|Cluster-60005.66392|Cluster-60005.17090|Cluster-60005.51660|Cluster-60005.57683
KEGG	ko00590	Arachidonic acid metabolism	60|13055	180|37029	0.611212	0.949271	60	Cluster-60005.81156|Cluster-60005.111629|Cluster-60005.94622|Cluster-60005.27046|Cluster-59532.0|Cluster-62544.0|Cluster-60005.97153|Cluster-60005.39516|Cluster-60005.41774|Cluster-60005.92216|Cluster-60005.114216|Cluster-34185.0|Cluster-60639.0|Cluster-60005.31212|Cluster-60005.42022|Cluster-62584.0|Cluster-60005.25055|Cluster-60005.6478|Cluster-60005.94444|Cluster-60005.30425|Cluster-71901.0|Cl…
KEGG	ko04510	Focal adhesion	112|13055	334|37029	0.61471	0.950498	112	Cluster-26533.1|Cluster-67839.0|Cluster-60005.74541|Cluster-60005.49895|Cluster-60005.75788|Cluster-60005.34059|Cluster-28842.0|Cluster-60005.34188|Cluster-44001.0|Cluster-60005.117370|Cluster-60005.91820|Cluster-60005.31381|Cluster-4831.0|Cluster-60005.87738|Cluster-60005.58420|Cluster-60005.4860|Cluster-7043.0|Cluster-60005.82057|Cluster-60005.66858|Cluster-60005.81678|Cluster-60005.24492|Clust…
KEGG	ko00010	Glycolysis / Gluconeogenesis	313|13055	925|37029	0.617999	0.950878	313	Cluster-60005.45222|Cluster-60005.97158|Cluster-60005.53536|Cluster-60005.103078|Cluster-60005.34382|Cluster-60005.56503|Cluster-60005.46556|Cluster-60005.45237|Cluster-60005.78012|Cluster-60005.50796|Cluster-60005.40053|Cluster-60005.55614|Cluster-60005.26051|Cluster-60005.65817|Cluster-60005.22243|Cluster-60005.74386|Cluster-60005.99265|Cluster-60005.67939|Cluster-60005.92635|Cluster-60005.9809…
KEGG	ko04213	Longevity regulating pathway - multiple species	243|13055	720|37029	0.620374	0.950878	243	Cluster-60005.29137|Cluster-60005.58154|Cluster-43025.0|Cluster-60005.65669|Cluster-60005.47859|Cluster-44143.0|Cluster-60005.63691|Cluster-60005.79889|Cluster-60005.58057|Cluster-60005.21486|Cluster-77991.0|Cluster-60005.68850|Cluster-60005.79196|Cluster-69885.0|Cluster-60005.101597|Cluster-60005.52250|Cluster-60005.125508|Cluster-60005.91544|Cluster-60005.102554|Cluster-25001.0|Cluster-60005.29…
KEGG	ko04933	AGE-RAGE signaling pathway in diabetic complications	72|13055	217|37029	0.630231	0.957535	72	Cluster-60005.66858|Cluster-26533.1|Cluster-60005.109909|Cluster-58621.0|Cluster-60005.80595|Cluster-60005.9183|Cluster-60005.40546|Cluster-60005.95049|Cluster-60005.103043|Cluster-60005.69812|Cluster-60005.2996|Cluster-60005.54296|Cluster-69388.2|Cluster-60005.34188|Cluster-60005.105460|Cluster-8986.0|Cluster-60005.119855|Cluster-60005.60745|Cluster-7910.0|Cluster-60005.114573|Cluster-79380.0|Cl…
KEGG	ko00562	Inositol phosphate metabolism	146|13055	437|37029	0.640596	0.957535	146	Cluster-60005.90914|Cluster-60005.2705|Cluster-60005.47854|Cluster-60005.57493|Cluster-60005.35199|Cluster-60005.97852|Cluster-60005.69412|Cluster-60005.47326|Cluster-60005.100838|Cluster-60005.63614|Cluster-30527.0|Cluster-4831.0|Cluster-60005.100538|Cluster-60005.84532|Cluster-60005.68178|Cluster-60005.43774|Cluster-60005.73080|Cluster-60005.87782|Cluster-60005.30646|Cluster-60005.30645|Cluster…
KEGG	ko00514	Other types of O-glycan biosynthesis	20|13055	62|37029	0.641751	0.957535	20	Cluster-60005.49485|Cluster-60005.50193|Cluster-60005.99272|Cluster-77883.0|Cluster-60005.46961|Cluster-71061.0|Cluster-60005.111375|Cluster-47785.0|Cluster-51976.0|Cluster-60005.74648|Cluster-60005.79602|Cluster-79185.0|Cluster-60005.51833|Cluster-60005.89880|Cluster-60005.115512|Cluster-60005.55898|Cluster-67299.0|Cluster-50345.0|Cluster-60005.37614|Cluster-60005.84576
KEGG	ko04728	Dopaminergic synapse	114|13055	343|37029	0.646731	0.957535	114	Cluster-60005.95436|Cluster-67839.0|Cluster-60005.63442|Cluster-60005.109973|Cluster-59244.0|Cluster-60005.52644|Cluster-5125.0|Cluster-60005.49895|Cluster-81346.0|Cluster-60005.47636|Cluster-60005.34059|Cluster-60005.66361|Cluster-28842.0|Cluster-66359.0|Cluster-64379.0|Cluster-60005.80679|Cluster-60005.99666|Cluster-60005.4110|Cluster-60005.40064|Cluster-60005.44521|Cluster-60005.31381|Cluster-…
KEGG	ko05310	Asthma	2|13055	6|37029	0.648128	0.957535	2	Cluster-57909.0|Cluster-60005.75404
KEGG	ko00401	Novobiocin biosynthesis	6|13055	19|37029	0.648389	0.957535	6	Cluster-53420.0|Cluster-60005.69087|Cluster-60005.34966|Cluster-60005.107247|Cluster-60005.33426|Cluster-60005.33425
KEGG	ko04964	Proximal tubule bicarbonate reclamation	36|13055	111|37029	0.653586	0.957535	36	Cluster-60005.14109|Cluster-60005.68890|Cluster-60005.83923|Cluster-60005.5799|Cluster-12255.0|Cluster-60005.26222|Cluster-60005.98741|Cluster-60005.38740|Cluster-60005.57139|Cluster-60005.17956|Cluster-60005.34117|Cluster-60005.28291|Cluster-60005.38389|Cluster-7401.0|Cluster-60005.99537|Cluster-60005.56526|Cluster-60005.18327|Cluster-62169.0|Cluster-60005.14893|Cluster-60005.50722|Cluster-60005…
KEGG	ko03018	RNA degradation	307|13055	914|37029	0.659614	0.957535	307	Cluster-46380.0|Cluster-60005.14552|Cluster-60005.38823|Cluster-60005.48970|Cluster-60005.47572|Cluster-60005.65660|Cluster-60005.116490|Cluster-60005.67794|Cluster-60005.104846|Cluster-60005.62745|Cluster-60005.71041|Cluster-60005.17971|Cluster-60005.62967|Cluster-60005.30659|Cluster-60005.90700|Cluster-60005.47918|Cluster-69471.0|Cluster-60005.22243|Cluster-60005.41106|Cluster-60005.76923|Clust…
KEGG	ko00909	Sesquiterpenoid and triterpenoid biosynthesis	10|13055	32|37029	0.663074	0.957535	10	Cluster-60005.25914|Cluster-60005.42372|Cluster-60005.87577|Cluster-60005.48791|Cluster-60005.103276|Cluster-60005.94831|Cluster-40520.0|Cluster-60005.60849|Cluster-60005.60848|Cluster-60005.14810
KEGG	ko03022	Basal transcription factors	103|13055	312|37029	0.663651	0.957535	103	Cluster-63139.0|Cluster-60005.10136|Cluster-60005.81207|Cluster-60005.67202|Cluster-60005.66076|Cluster-60005.57931|Cluster-60005.63193|Cluster-60005.57395|Cluster-60005.91411|Cluster-3309.0|Cluster-60005.55683|Cluster-60005.34939|Cluster-60005.116767|Cluster-60005.89012|Cluster-60005.52321|Cluster-60005.85535|Cluster-60005.56252|Cluster-60005.27355|Cluster-60005.21475|Cluster-60005.31146|Cluster…
KEGG	ko04212	Longevity regulating pathway - worm	189|13055	567|37029	0.665428	0.957535	189	Cluster-43025.0|Cluster-60005.29203|Cluster-60005.47859|Cluster-60005.44765|Cluster-60005.67770|Cluster-60005.55091|Cluster-60005.24369|Cluster-60005.62745|Cluster-60005.65908|Cluster-78700.0|Cluster-60005.101597|Cluster-60005.48486|Cluster-60005.47918|Cluster-60005.102554|Cluster-25001.0|Cluster-56274.0|Cluster-60005.101549|Cluster-60005.36447|Cluster-60005.124640|Cluster-38854.0|Cluster-60005.3…
KEGG	ko05210	Colorectal cancer	78|13055	238|37029	0.66903	0.957535	78	Cluster-60005.109489|Cluster-60005.52845|Cluster-60005.84100|Cluster-67839.0|Cluster-60005.66360|Cluster-60005.108424|Cluster-60005.16548|Cluster-60005.40546|Cluster-60005.53041|Cluster-60005.95049|Cluster-60005.103043|Cluster-60005.36669|Cluster-60005.50752|Cluster-60005.15094|Cluster-60005.91235|Cluster-28842.0|Cluster-60005.34188|Cluster-60005.105460|Cluster-8986.0|Cluster-71287.0|Cluster-6000…
KEGG	ko04622	RIG-I-like receptor signaling pathway	32|13055	100|37029	0.673264	0.957535	32	Cluster-60005.65669|Cluster-60005.45045|Cluster-60005.39515|Cluster-60005.70428|Cluster-60005.66383|Cluster-60005.125347|Cluster-60005.28908|Cluster-60005.8472|Cluster-60005.43698|Cluster-60005.39597|Cluster-60005.99909|Cluster-60005.17441|Cluster-60005.46519|Cluster-60005.95310|Cluster-60005.68958|Cluster-60005.56002|Cluster-60005.24347|Cluster-8661.0|Cluster-60005.47626|Cluster-73894.0|Cluster-…
KEGG	ko04919	Thyroid hormone signaling pathway	137|13055	414|37029	0.673441	0.957535	137	Cluster-67839.0|Cluster-60005.121035|Cluster-60005.108249|Cluster-60005.74092|Cluster-43189.0|Cluster-60005.34220|Cluster-60005.34188|Cluster-60005.64415|Cluster-60005.91544|Cluster-60005.64413|Cluster-60005.20275|Cluster-60005.71864|Cluster-60005.51683|Cluster-60005.31381|Cluster-60005.119476|Cluster-60005.16020|Cluster-60005.16021|Cluster-60005.67982|Cluster-60005.55749|Cluster-60005.71865|Clus…
KEGG	ko00062	Fatty acid elongation	60|13055	185|37029	0.680471	0.957535	60	Cluster-60005.80854|Cluster-32595.0|Cluster-60005.81886|Cluster-60005.108023|Cluster-60005.62044|Cluster-60005.86117|Cluster-60005.107380|Cluster-60005.39575|Cluster-60005.66628|Cluster-60005.50446|Cluster-60005.106362|Cluster-62498.0|Cluster-60005.50878|Cluster-60005.23026|Cluster-60005.34640|Cluster-60005.38640|Cluster-60005.42587|Cluster-60005.57906|Cluster-52393.0|Cluster-60005.59512|Cluster-…
KEGG	ko00100	Steroid biosynthesis	90|13055	275|37029	0.682151	0.957535	90	Cluster-60005.67674|Cluster-60005.59954|Cluster-60005.29520|Cluster-60005.33295|Cluster-60005.64140|Cluster-16912.0|Cluster-60005.25914|Cluster-60005.92738|Cluster-60005.33593|Cluster-60005.17208|Cluster-60005.93242|Cluster-60005.3535|Cluster-8592.0|Cluster-60005.51992|Cluster-60005.16860|Cluster-60005.20367|Cluster-60005.38090|Cluster-60005.54507|Cluster-60005.13604|Cluster-38508.0|Cluster-60005…
KEGG	ko04960	Aldosterone-regulated sodium reabsorption	23|13055	73|37029	0.682492	0.957535	23	Cluster-60005.40546|Cluster-60005.98741|Cluster-60005.34188|Cluster-8793.0|Cluster-60005.70177|Cluster-60005.28291|Cluster-60005.24549|Cluster-60005.55788|Cluster-60005.56526|Cluster-60005.14893|Cluster-60005.50722|Cluster-60005.83158|Cluster-60005.55749|Cluster-60005.42031|Cluster-60005.60959|Cluster-60005.75266|Cluster-60005.28289|Cluster-60005.41969|Cluster-60005.66720|Cluster-60005.69609|Clus…
KEGG	ko00410	beta-Alanine metabolism	103|13055	314|37029	0.684224	0.957535	103	Cluster-60005.120013|Cluster-60005.96737|Cluster-64110.0|Cluster-60005.18368|Cluster-60005.11724|Cluster-60005.92478|Cluster-60005.69412|Cluster-4157.0|Cluster-60005.98364|Cluster-60005.47326|Cluster-60005.100838|Cluster-60005.81936|Cluster-60005.70503|Cluster-60005.69152|Cluster-60541.1|Cluster-60005.45506|Cluster-60005.73080|Cluster-60005.30646|Cluster-60005.30645|Cluster-60005.76829|Cluster-60…
KEGG	ko04745	Phototransduction - fly	39|13055	122|37029	0.68604	0.957535	39	Cluster-5125.0|Cluster-60005.99666|Cluster-43849.0|Cluster-60005.112399|Cluster-68747.0|Cluster-60005.39766|Cluster-81346.0|Cluster-66359.0|Cluster-60005.40968|Cluster-66452.0|Cluster-60005.21513|Cluster-75025.0|Cluster-60005.4110|Cluster-60005.71157|Cluster-60005.32476|Cluster-60005.76997|Cluster-60005.55680|Cluster-60005.98970|Cluster-60005.77215|Cluster-78429.0|Cluster-78564.0|Cluster-60005.29…
KEGG	ko00140	Steroid hormone biosynthesis	19|13055	61|37029	0.68969	0.957535	19	Cluster-32595.0|Cluster-60005.73396|Cluster-60005.109841|Cluster-60005.35254|Cluster-60005.109774|Cluster-5946.0|Cluster-60005.120759|Cluster-60005.95769|Cluster-60005.106362|Cluster-60005.94063|Cluster-60005.69068|Cluster-60005.82251|Cluster-60005.11151|Cluster-60005.70524|Cluster-18342.0|Cluster-35239.0|Cluster-60005.59420|Cluster-60005.63442|Cluster-58996.0
KEGG	ko04115	p53 signaling pathway	68|13055	210|37029	0.692605	0.957535	68	Cluster-60005.81307|Cluster-60005.75285|Cluster-60005.38975|Cluster-60005.66360|Cluster-9815.0|Cluster-60005.16548|Cluster-60005.31445|Cluster-60005.16854|Cluster-60005.59398|Cluster-60005.105660|Cluster-60005.13104|Cluster-60005.74335|Cluster-60005.37937|Cluster-7868.0|Cluster-60005.58956|Cluster-60005.85425|Cluster-60005.28835|Cluster-60005.28836|Cluster-60005.58072|Cluster-60005.99109|Cluster-…
KEGG	ko04391	Hippo signaling pathway - fly	60|13055	186|37029	0.693562	0.957535	60	Cluster-45833.0|Cluster-60005.27608|Cluster-60005.55810|Cluster-60005.104310|Cluster-59244.0|Cluster-31418.0|Cluster-60005.95436|Cluster-60005.52644|Cluster-60005.84677|Cluster-60005.61833|Cluster-60005.97701|Cluster-60005.64432|Cluster-60005.87870|Cluster-60005.47501|Cluster-60005.47059|Cluster-60005.77700|Cluster-60005.62913|Cluster-60005.71647|Cluster-60005.95838|Cluster-60005.76954|Cluster-60…
KEGG	ko04610	Complement and coagulation cascades	1|13055	3|37029	0.693895	0.957535	1	Cluster-60005.81026
KEGG	ko04320	Dorso-ventral axis formation	9|13055	30|37029	0.700069	0.957535	9	Cluster-60005.84100|Cluster-60005.23072|Cluster-60005.70177|Cluster-60005.93696|Cluster-60005.41969|Cluster-60005.40546|Cluster-60005.22806|Cluster-60005.34188|Cluster-60005.42031
KEGG	ko00563	Glycosylphosphatidylinositol(GPI)-anchor biosynthesis	41|13055	129|37029	0.700571	0.957535	41	Cluster-60005.68123|Cluster-60005.66986|Cluster-60005.69836|Cluster-60005.64205|Cluster-60005.38453|Cluster-60005.113345|Cluster-60005.79458|Cluster-58102.0|Cluster-66175.0|Cluster-56612.0|Cluster-60005.122064|Cluster-60005.94333|Cluster-60005.22487|Cluster-60005.22486|Cluster-60005.8361|Cluster-60005.44445|Cluster-43418.0|Cluster-60005.75050|Cluster-60005.82761|Cluster-60005.91209|Cluster-60005.…
KEGG	ko04112	Cell cycle - Caulobacter	37|13055	117|37029	0.703502	0.957535	37	Cluster-60005.74580|Cluster-60005.56137|Cluster-60005.78810|Cluster-60005.54795|Cluster-78700.0|Cluster-60005.122482|Cluster-81399.0|Cluster-65792.0|Cluster-60005.29700|Cluster-60005.91860|Cluster-60005.41425|Cluster-60005.70350|Cluster-60005.93442|Cluster-60005.55709|Cluster-60005.69240|Cluster-60005.60840|Cluster-60005.62787|Cluster-60005.89046|Cluster-60005.74579|Cluster-60005.74403|Cluster-60…
KEGG	ko04390	Hippo signaling pathway	75|13055	232|37029	0.70387	0.957535	75	Cluster-60005.93745|Cluster-51497.0|Cluster-67839.0|Cluster-60005.34059|Cluster-60005.55810|Cluster-60005.104310|Cluster-59244.0|Cluster-60005.52644|Cluster-60005.87870|Cluster-60005.27608|Cluster-60005.49895|Cluster-60005.84677|Cluster-60005.50752|Cluster-60005.97701|Cluster-60005.64432|Cluster-60005.91235|Cluster-28842.0|Cluster-60005.47501|Cluster-60005.47059|Cluster-60005.61833|Cluster-60005.…
KEGG	ko04974	Protein digestion and absorption	69|13055	215|37029	0.716301	0.957535	69	Cluster-60005.61265|Cluster-26533.1|Cluster-60005.81421|Cluster-60005.121256|Cluster-60005.49593|Cluster-58621.0|Cluster-60005.33550|Cluster-60005.26651|Cluster-60005.36150|Cluster-60005.28291|Cluster-60005.75788|Cluster-60005.42776|Cluster-60005.70872|Cluster-60005.54604|Cluster-60005.9183|Cluster-69388.2|Cluster-60005.56038|Cluster-60005.8016|Cluster-60005.30163|Cluster-9506.1|Cluster-79380.0|C…
KEGG	ko05146	Amoebiasis	60|13055	188|37029	0.718888	0.957535	60	Cluster-26533.1|Cluster-60005.79196|Cluster-60005.58070|Cluster-58621.0|Cluster-60005.75385|Cluster-60005.9183|Cluster-60005.45132|Cluster-61922.0|Cluster-60005.54604|Cluster-66759.0|Cluster-60005.75633|Cluster-69388.2|Cluster-67631.0|Cluster-79380.0|Cluster-60005.91691|Cluster-60005.75256|Cluster-60005.93085|Cluster-60005.117370|Cluster-60005.32735|Cluster-60005.11184|Cluster-57386.0|Cluster-600…
KEGG	ko04530	Tight junction	65|13055	204|37029	0.729099	0.957535	65	Cluster-60005.27608|Cluster-60005.80836|Cluster-60005.5792|Cluster-59244.0|Cluster-60005.3404|Cluster-60005.16854|Cluster-60005.95436|Cluster-60005.52644|Cluster-36445.0|Cluster-60005.74335|Cluster-60005.97701|Cluster-60005.87870|Cluster-7868.0|Cluster-60005.47501|Cluster-60005.78054|Cluster-8234.0|Cluster-63766.0|Cluster-60005.81546|Cluster-60005.47391|Cluster-60005.71647|Cluster-60005.81629|Clu…
KEGG	ko05204	Chemical carcinogenesis	58|13055	183|37029	0.732043	0.957535	58	Cluster-71901.0|Cluster-60005.81156|Cluster-60005.86570|Cluster-59532.0|Cluster-60005.37915|Cluster-64040.0|Cluster-60005.1672|Cluster-60005.91161|Cluster-60005.73940|Cluster-60005.56439|Cluster-60005.7006|Cluster-60005.29268|Cluster-60005.51286|Cluster-3866.0|Cluster-50396.0|Cluster-60005.99762|Cluster-60005.5597|Cluster-60005.67939|Cluster-60005.95243|Cluster-60005.72468|Cluster-60005.29089|Clu…
KEGG	ko04139	Regulation of mitophagy - yeast	131|13055	403|37029	0.732902	0.957535	131	Cluster-58364.0|Cluster-60005.86701|Cluster-60005.121035|Cluster-60005.67878|Cluster-60005.3252|Cluster-60005.80836|Cluster-4735.1|Cluster-60005.36999|Cluster-60005.34220|Cluster-60005.20275|Cluster-60005.35518|Cluster-8039.0|Cluster-38854.0|Cluster-26612.0|Cluster-60005.119476|Cluster-60005.100538|Cluster-60005.16020|Cluster-60005.16021|Cluster-60005.37801|Cluster-60005.11462|Cluster-63251.0|Clu…
KEGG	ko00603	Glycosphingolipid biosynthesis - globo series	18|13055	60|37029	0.736025	0.957535	18	Cluster-60005.86408|Cluster-74096.0|Cluster-74096.1|Cluster-60005.49941|Cluster-60005.91883|Cluster-60005.1870|Cluster-60005.71943|Cluster-76623.0|Cluster-57032.0|Cluster-50817.0|Cluster-70478.0|Cluster-60005.70748|Cluster-60005.87371|Cluster-60005.20273|Cluster-60005.99129|Cluster-60005.114960|Cluster-56895.0|Cluster-60005.42860
KEGG	ko04520	Adherens junction	77|13055	241|37029	0.736552	0.957535	77	Cluster-60005.63798|Cluster-60005.66858|Cluster-60005.37171|Cluster-60005.62702|Cluster-60005.87878|Cluster-60005.40546|Cluster-60005.95049|Cluster-60005.103043|Cluster-60005.36669|Cluster-60005.2996|Cluster-60005.109489|Cluster-7043.0|Cluster-60005.36999|Cluster-60005.34188|Cluster-60005.105460|Cluster-60005.47391|Cluster-8234.0|Cluster-60005.60745|Cluster-7910.0|Cluster-60005.114573|Cluster-898…
KEGG	ko04122	Sulfur relay system	35|13055	113|37029	0.737051	0.957535	35	Cluster-26983.1|Cluster-60005.74540|Cluster-60005.79308|Cluster-60005.59913|Cluster-60005.6685|Cluster-60005.79133|Cluster-60005.19135|Cluster-60005.80536|Cluster-60005.46717|Cluster-60005.15379|Cluster-60005.45630|Cluster-60005.79351|Cluster-60005.84553|Cluster-72169.0|Cluster-69095.1|Cluster-60005.73748|Cluster-60005.74618|Cluster-60005.37865|Cluster-60005.89294|Cluster-60005.86309|Cluster-6000…
KEGG	ko01040	Biosynthesis of unsaturated fatty acids	104|13055	323|37029	0.741924	0.957535	104	Cluster-60005.93960|Cluster-60005.57550|Cluster-60005.92335|Cluster-76534.0|Cluster-60005.107380|Cluster-60005.75022|Cluster-60005.59420|Cluster-60005.34137|Cluster-26113.0|Cluster-60005.34504|Cluster-60005.48671|Cluster-60005.27967|Cluster-60005.95178|Cluster-60005.76338|Cluster-60005.11151|Cluster-60005.60062|Cluster-60005.23710|Cluster-60005.31732|Cluster-60005.5217|Cluster-60005.106362|Cluste…
KEGG	ko05217	Basal cell carcinoma	11|13055	38|37029	0.744216	0.957535	11	Cluster-60005.47959|Cluster-67839.0|Cluster-60005.124981|Cluster-60005.124982|Cluster-43139.0|Cluster-60005.47197|Cluster-60005.50752|Cluster-60005.31381|Cluster-60005.91235|Cluster-28842.0|Cluster-60005.105717
KEGG	ko00940	Phenylpropanoid biosynthesis	30|13055	98|37029	0.744539	0.957535	30	Cluster-60005.75067|Cluster-60005.17326|Cluster-60005.56407|Cluster-57786.0|Cluster-60005.37313|Cluster-60005.61557|Cluster-39566.0|Cluster-60005.35163|Cluster-60005.33026|Cluster-60005.65372|Cluster-60005.37079|Cluster-60005.84253|Cluster-60005.68153|Cluster-60005.81185|Cluster-60005.52161|Cluster-60005.57358|Cluster-54653.0|Cluster-60005.20528|Cluster-60005.59473|Cluster-60005.7012|Cluster-6000…
KEGG	ko00480	Glutathione metabolism	184|13055	563|37029	0.744897	0.957535	184	Cluster-60005.81156|Cluster-60005.43637|Cluster-59532.0|Cluster-64040.0|Cluster-60005.3344|Cluster-60005.102414|Cluster-60005.66079|Cluster-70644.0|Cluster-60005.7006|Cluster-60005.73441|Cluster-48863.0|Cluster-60005.57825|Cluster-60005.74382|Cluster-60005.91829|Cluster-4157.0|Cluster-60005.5597|Cluster-60005.49057|Cluster-60005.119722|Cluster-60005.95936|Cluster-60005.39628|Cluster-3866.0|Cluste…
KEGG	ko04611	Platelet activation	81|13055	254|37029	0.745846	0.957535	81	Cluster-60005.93745|Cluster-51497.0|Cluster-60005.79196|Cluster-60005.91739|Cluster-60005.72439|Cluster-58621.0|Cluster-60005.82844|Cluster-60005.40546|Cluster-26533.1|Cluster-60005.49895|Cluster-60005.58587|Cluster-60005.31212|Cluster-34185.0|Cluster-60005.72415|Cluster-60005.46301|Cluster-60005.34059|Cluster-60005.54296|Cluster-69388.2|Cluster-60005.34188|Cluster-60005.90188|Cluster-60005.58588…
KEGG	ko04064	NF-kappa B signaling pathway	39|13055	126|37029	0.746899	0.957535	39	Cluster-60005.75285|Cluster-60005.20800|Cluster-60005.31085|Cluster-60005.80836|Cluster-60005.52909|Cluster-60005.113653|Cluster-60005.47391|Cluster-8234.0|Cluster-60005.75046|Cluster-60005.99109|Cluster-19992.1|Cluster-60005.81629|Cluster-8039.0|Cluster-63475.0|Cluster-60005.8472|Cluster-60005.55010|Cluster-60005.14768|Cluster-60005.68340|Cluster-60005.104509|Cluster-60005.111043|Cluster-60005.5…
KEGG	ko04330	Notch signaling pathway	50|13055	160|37029	0.749577	0.957535	50	Cluster-60005.63798|Cluster-60005.66789|Cluster-60005.62607|Cluster-60005.108249|Cluster-60005.34287|Cluster-60005.64253|Cluster-60005.46765|Cluster-60005.29529|Cluster-60005.91544|Cluster-60005.28552|Cluster-44446.0|Cluster-60005.48642|Cluster-44383.0|Cluster-60005.37171|Cluster-60005.51683|Cluster-60005.123847|Cluster-60005.38968|Cluster-60005.49587|Cluster-45776.0|Cluster-53067.0|Cluster-60005…
KEGG	ko05221	Acute myeloid leukemia	36|13055	117|37029	0.750729	0.957535	36	Cluster-43025.0|Cluster-60005.66303|Cluster-60005.21893|Cluster-60005.10098|Cluster-60005.31567|Cluster-60005.40546|Cluster-60005.84100|Cluster-60005.58310|Cluster-77991.0|Cluster-60005.119476|Cluster-60005.64991|Cluster-60005.34188|Cluster-60005.27289|Cluster-60005.74163|Cluster-60005.70177|Cluster-60005.5490|Cluster-60005.5491|Cluster-60005.122021|Cluster-58959.0|Cluster-60005.16020|Cluster-600…
KEGG	ko00950	Isoquinoline alkaloid biosynthesis	36|13055	117|37029	0.750729	0.957535	36	Cluster-60005.108033|Cluster-60005.29506|Cluster-28211.0|Cluster-60005.11724|Cluster-60005.62863|Cluster-60005.58954|Cluster-60005.89656|Cluster-60005.54722|Cluster-60005.95749|Cluster-6041.0|Cluster-60005.25229|Cluster-60005.53919|Cluster-60005.112281|Cluster-60005.71771|Cluster-60005.71442|Cluster-60005.25277|Cluster-60005.103449|Cluster-47330.0|Cluster-60005.69869|Cluster-27493.0|Cluster-60005…
KEGG	ko04916	Melanogenesis	67|13055	212|37029	0.750881	0.957535	67	Cluster-60005.63798|Cluster-5125.0|Cluster-67839.0|Cluster-60005.4110|Cluster-60005.40546|Cluster-60005.112399|Cluster-68747.0|Cluster-60005.39766|Cluster-60005.99666|Cluster-81346.0|Cluster-60005.79196|Cluster-60005.50752|Cluster-60005.91235|Cluster-28842.0|Cluster-60005.34188|Cluster-60005.84100|Cluster-66359.0|Cluster-60005.40968|Cluster-66452.0|Cluster-60005.124982|Cluster-60005.21513|Cluster…
KEGG	ko00905	Brassinosteroid biosynthesis	4|13055	15|37029	0.756437	0.957535	4	Cluster-60005.119636|Cluster-60005.72946|Cluster-60005.111187|Cluster-47540.0
KEGG	ko04110	Cell cycle	235|13055	717|37029	0.757326	0.957535	235	Cluster-67839.0|Cluster-60005.68709|Cluster-60005.29112|Cluster-60005.52249|Cluster-60005.52315|Cluster-60005.45236|Cluster-60005.49208|Cluster-60005.61833|Cluster-60005.37937|Cluster-28842.0|Cluster-60005.61655|Cluster-60005.91544|Cluster-60005.28835|Cluster-60005.35342|Cluster-60005.37984|Cluster-60005.37985|Cluster-60005.72606|Cluster-60005.60558|Cluster-60005.95838|Cluster-78061.0|Cluster-981…
KEGG	ko04261	Adrenergic signaling in cardiomyocytes	118|13055	367|37029	0.757913	0.957535	118	Cluster-60005.95436|Cluster-60005.75884|Cluster-59244.0|Cluster-60005.52644|Cluster-5125.0|Cluster-60005.49895|Cluster-81346.0|Cluster-60005.47636|Cluster-60005.34059|Cluster-60005.34188|Cluster-66359.0|Cluster-64379.0|Cluster-60005.80679|Cluster-60005.99666|Cluster-60005.4110|Cluster-60005.44521|Cluster-60005.55680|Cluster-60005.45821|Cluster-78564.0|Cluster-60005.28569|Cluster-60005.42723|Clust…
KEGG	ko00660	C5-Branched dibasic acid metabolism	22|13055	74|37029	0.762448	0.957535	22	Cluster-60005.4763|Cluster-60005.33456|Cluster-60005.38561|Cluster-60005.79279|Cluster-60005.54699|Cluster-60005.59372|Cluster-60005.46368|Cluster-60005.64975|Cluster-60005.117741|Cluster-60005.117743|Cluster-60005.109056|Cluster-60005.51506|Cluster-60005.67748|Cluster-60005.57046|Cluster-60005.44032|Cluster-50215.0|Cluster-60005.44031|Cluster-60005.89359|Cluster-60005.53194|Cluster-60005.80235|C…
KEGG	ko05414	Dilated cardiomyopathy	8|13055	29|37029	0.767485	0.957535	8	Cluster-60005.45132|Cluster-60005.71390|Cluster-60005.72716|Cluster-60005.69739|Cluster-52298.0|Cluster-60005.79196|Cluster-57386.0|Cluster-60005.91691
KEGG	ko00980	Metabolism of xenobiotics by cytochrome P450	55|13055	177|37029	0.769579	0.957535	55	Cluster-60005.81156|Cluster-60005.86570|Cluster-60005.3344|Cluster-59532.0|Cluster-60005.37915|Cluster-64040.0|Cluster-39422.0|Cluster-60005.91161|Cluster-60005.73940|Cluster-60005.56439|Cluster-66668.0|Cluster-60005.29268|Cluster-60005.51286|Cluster-3866.0|Cluster-60005.1672|Cluster-60005.99762|Cluster-60005.5597|Cluster-60005.67939|Cluster-60005.7006|Cluster-60005.95243|Cluster-60005.29089|Clus…
KEGG	ko00982	Drug metabolism - cytochrome P450	55|13055	177|37029	0.769579	0.957535	55	Cluster-71901.0|Cluster-60005.81156|Cluster-60005.39041|Cluster-60005.14361|Cluster-60005.86570|Cluster-59532.0|Cluster-28211.0|Cluster-64040.0|Cluster-39422.0|Cluster-60005.91161|Cluster-60005.73940|Cluster-66668.0|Cluster-60005.29268|Cluster-60005.51286|Cluster-3866.0|Cluster-50396.0|Cluster-60005.99762|Cluster-60005.5597|Cluster-60005.67939|Cluster-60005.7006|Cluster-60005.95243|Cluster-60005.…
KEGG	ko04066	HIF-1 signaling pathway	142|13055	441|37029	0.77165	0.957535	142	Cluster-60005.64500|Cluster-43025.0|Cluster-64348.0|Cluster-60005.38829|Cluster-77991.0|Cluster-60005.77535|Cluster-60005.40053|Cluster-60005.34188|Cluster-60005.45335|Cluster-60005.35342|Cluster-60005.74386|Cluster-60005.60244|Cluster-60005.99265|Cluster-60005.26952|Cluster-60005.122021|Cluster-60005.108644|Cluster-60005.61228|Cluster-60005.119476|Cluster-70569.0|Cluster-60005.73367|Cluster-5781…
KEGG	ko00941	Flavonoid biosynthesis	1|13055	4|37029	0.772316	0.957535	1	Cluster-60005.69305
KEGG	ko00071	Fatty acid degradation	144|13055	448|37029	0.778701	0.957535	144	Cluster-60005.57550|Cluster-80144.1|Cluster-60005.92335|Cluster-76534.0|Cluster-60005.75651|Cluster-60005.60062|Cluster-60005.29055|Cluster-60005.19956|Cluster-60005.34137|Cluster-60005.15817|Cluster-9291.0|Cluster-54663.0|Cluster-60005.98364|Cluster-60005.70154|Cluster-60005.52245|Cluster-9163.0|Cluster-60005.53262|Cluster-60541.1|Cluster-60005.99700|Cluster-64157.0|Cluster-60005.70728|Cluster-6…
KEGG	ko05164	Influenza A	167|13055	518|37029	0.784339	0.957535	167	Cluster-60005.58154|Cluster-67839.0|Cluster-5283.0|Cluster-6821.2|Cluster-60005.58057|Cluster-6821.1|Cluster-60005.21486|Cluster-60005.59434|Cluster-8399.0|Cluster-69885.0|Cluster-60005.66360|Cluster-28842.0|Cluster-60005.34188|Cluster-60005.31939|Cluster-60005.26868|Cluster-60005.18248|Cluster-60005.40942|Cluster-60005.31381|Cluster-60005.35590|Cluster-60005.106434|Cluster-79656.1|Cluster-60005.…
KEGG	ko00471	D-Glutamine and D-glutamate metabolism	9|13055	33|37029	0.784596	0.957535	9	Cluster-60005.100417|Cluster-60005.68890|Cluster-60005.32297|Cluster-62169.0|Cluster-60005.51426|Cluster-60005.95608|Cluster-7401.0|Cluster-60005.106052|Cluster-60005.17956
KEGG	ko00561	Glycerolipid metabolism	149|13055	464|37029	0.785292	0.957535	149	Cluster-60005.65986|Cluster-60005.65985|Cluster-60005.79883|Cluster-60005.35198|Cluster-81886.0|Cluster-60005.22003|Cluster-60005.58919|Cluster-60005.60908|Cluster-60005.44604|Cluster-60005.98364|Cluster-60005.117476|Cluster-60005.112171|Cluster-60005.103866|Cluster-60005.46495|Cluster-60005.94091|Cluster-56785.0|Cluster-61793.0|Cluster-60005.73959|Cluster-60005.36548|Cluster-7424.0|Cluster-60005…
KEGG	ko00300	Lysine biosynthesis	50|13055	163|37029	0.78567	0.957535	50	Cluster-60005.96737|Cluster-60005.11784|Cluster-60005.11783|Cluster-60005.27527|Cluster-57635.0|Cluster-37438.0|Cluster-60005.49896|Cluster-60005.45140|Cluster-60005.58607|Cluster-60005.42708|Cluster-60005.22691|Cluster-81576.0|Cluster-60005.55232|Cluster-29286.0|Cluster-60005.48898|Cluster-60005.98364|Cluster-60005.74485|Cluster-60005.55467|Cluster-60005.86140|Cluster-60005.111532|Cluster-60005.…
KEGG	ko00521	Streptomycin biosynthesis	28|13055	95|37029	0.794904	0.96144	28	Cluster-60005.68602|Cluster-60005.68601|Cluster-60005.25219|Cluster-60005.42434|Cluster-60005.97700|Cluster-60005.40053|Cluster-60005.23213|Cluster-60005.124474|Cluster-60005.63614|Cluster-60005.108644|Cluster-60005.72080|Cluster-60005.67049|Cluster-60005.48860|Cluster-60005.103838|Cluster-60005.40102|Cluster-60005.48241|Cluster-60005.49175|Cluster-60005.53604|Cluster-50041.0|Cluster-60005.20427|…
KEGG	ko00053	Ascorbate and aldarate metabolism	90|13055	287|37029	0.797954	0.96144	90	Cluster-60005.90914|Cluster-60005.88885|Cluster-60005.48323|Cluster-60788.0|Cluster-60005.86749|Cluster-60005.39628|Cluster-60005.12800|Cluster-60005.84532|Cluster-60005.27961|Cluster-60005.76829|Cluster-60005.46495|Cluster-60005.1341|Cluster-10328.1|Cluster-63669.0|Cluster-60005.48803|Cluster-35336.0|Cluster-60005.70967|Cluster-60005.59536|Cluster-48970.0|Cluster-60005.104120|Cluster-60005.75059…
KEGG	ko04012	ErbB signaling pathway	49|13055	161|37029	0.79805	0.96144	49	Cluster-43025.0|Cluster-67839.0|Cluster-60005.21893|Cluster-60005.10098|Cluster-60005.31567|Cluster-60005.40546|Cluster-60005.84100|Cluster-60005.58310|Cluster-77991.0|Cluster-60005.66303|Cluster-60005.50752|Cluster-60005.64991|Cluster-60005.91235|Cluster-28842.0|Cluster-60005.34188|Cluster-60005.119476|Cluster-7373.0|Cluster-60005.27289|Cluster-71412.0|Cluster-60005.74163|Cluster-60005.124981|Cl…
KEGG	ko05140	Leishmaniasis	21|13055	73|37029	0.79983	0.96144	21	Cluster-60005.50198|Cluster-8105.0|Cluster-61096.0|Cluster-60005.40546|Cluster-60005.70177|Cluster-4757.0|Cluster-60005.49575|Cluster-60005.41969|Cluster-60005.74246|Cluster-60005.8472|Cluster-60005.41175|Cluster-41387.0|Cluster-60005.58616|Cluster-60005.113653|Cluster-60005.22806|Cluster-60005.34188|Cluster-60005.42031|Cluster-60005.24347|Cluster-60005.49350|Cluster-60005.31085|Cluster-60005.159…
KEGG	ko00330	Arginine and proline metabolism	158|13055	494|37029	0.804133	0.962215	158	Cluster-60005.11612|Cluster-60005.38795|Cluster-43172.0|Cluster-60005.93841|Cluster-60005.34832|Cluster-60005.66079|Cluster-60005.59424|Cluster-60005.43098|Cluster-48636.0|Cluster-60005.45887|Cluster-60005.57825|Cluster-60005.105473|Cluster-81994.1|Cluster-4157.0|Cluster-60005.98364|Cluster-26076.1|Cluster-60005.70503|Cluster-60005.40941|Cluster-60005.57650|Cluster-60005.105968|Cluster-60005.9729…
KEGG	ko00965	Betalain biosynthesis	5|13055	20|37029	0.805958	0.962215	5	Cluster-60005.71442|Cluster-60005.86591|Cluster-79615.0|Cluster-60005.63442|Cluster-60005.114394
KEGG	ko04350	TGF-beta signaling pathway	83|13055	267|37029	0.809681	0.963383	83	Cluster-60005.63798|Cluster-43025.0|Cluster-60005.97628|Cluster-7512.0|Cluster-25038.0|Cluster-59244.0|Cluster-60005.29112|Cluster-60005.55026|Cluster-60005.40546|Cluster-60005.27608|Cluster-60005.87870|Cluster-77991.0|Cluster-60005.49208|Cluster-60005.91763|Cluster-3095.0|Cluster-60005.97701|Cluster-60005.64991|Cluster-60005.34188|Cluster-60005.37342|Cluster-60005.54645|Cluster-60005.47501|Clust…
KEGG	ko00532	Glycosaminoglycan biosynthesis - chondroitin sulfate / dermatan sulfate	2|13055	9|37029	0.815362	0.964985	2	Cluster-60005.59839|Cluster-60005.70235
KEGG	ko00983	Drug metabolism - other enzymes	72|13055	234|37029	0.816526	0.964985	72	Cluster-60005.77344|Cluster-60005.38237|Cluster-60005.38236|Cluster-43527.0|Cluster-60005.124710|Cluster-60005.27646|Cluster-60005.56328|Cluster-60005.43516|Cluster-60005.114072|Cluster-60005.75792|Cluster-60005.73098|Cluster-32374.0|Cluster-60327.0|Cluster-60005.19570|Cluster-7922.0|Cluster-7184.0|Cluster-60005.53404|Cluster-60005.46021|Cluster-60005.41934|Cluster-60005.37472|Cluster-60005.11241…
KEGG	ko01230	Biosynthesis of amino acids	657|13055	1987|37029	0.82745	0.966248	657	Cluster-60005.119560|Cluster-60005.96343|Cluster-60005.21366|Cluster-24534.0|Cluster-60005.20867|Cluster-60005.117179|Cluster-60005.59950|Cluster-60005.104179|Cluster-60005.34599|Cluster-70233.0|Cluster-60005.22243|Cluster-60005.54400|Cluster-60005.50846|Cluster-40620.0|Cluster-60005.89305|Cluster-60005.98364|Cluster-60005.56545|Cluster-60005.18718|Cluster-60005.71771|Cluster-60005.73367|Cluster-…
KEGG	ko05020	Prion diseases	49|13055	164|37029	0.829548	0.966248	49	Cluster-60005.84100|Cluster-60005.79196|Cluster-60005.62467|Cluster-60005.94821|Cluster-60005.54862|Cluster-60005.18990|Cluster-60005.45132|Cluster-60005.39001|Cluster-16564.0|Cluster-60005.20508|Cluster-54442.0|Cluster-60005.34188|Cluster-60005.46072|Cluster-60005.2281|Cluster-60005.45591|Cluster-60005.102567|Cluster-60005.42297|Cluster-65540.0|Cluster-60005.91691|Cluster-60005.1296|Cluster-6000…
KEGG	ko00254	Aflatoxin biosynthesis	7|13055	28|37029	0.829691	0.966248	7	Cluster-60005.54451|Cluster-60005.54452|Cluster-60005.117632|Cluster-60005.69244|Cluster-60005.42455|Cluster-60005.22833|Cluster-60005.58934
KEGG	ko00270	Cysteine and methionine metabolism	232|13055	722|37029	0.831924	0.966248	232	Cluster-60005.117179|Cluster-60005.48875|Cluster-60005.49897|Cluster-60005.104179|Cluster-60005.43255|Cluster-60005.81694|Cluster-70233.0|Cluster-60005.39340|Cluster-60005.82784|Cluster-60005.69376|Cluster-60005.110202|Cluster-60005.39462|Cluster-60005.105473|Cluster-53219.0|Cluster-4157.0|Cluster-30709.0|Cluster-60005.98718|Cluster-79988.0|Cluster-60005.52392|Cluster-26076.1|Cluster-60005.16449|…
KEGG	ko02010	ABC transporters	113|13055	362|37029	0.833442	0.966248	113	Cluster-25900.0|Cluster-60005.14485|Cluster-60005.113324|Cluster-60005.42523|Cluster-60005.32268|Cluster-60005.54961|Cluster-51829.0|Cluster-60005.74720|Cluster-60005.47479|Cluster-60005.111452|Cluster-47945.0|Cluster-34742.0|Cluster-60005.24640|Cluster-60005.103652|Cluster-39972.0|Cluster-60005.46639|Cluster-60005.57558|Cluster-60005.31388|Cluster-60005.19264|Cluster-60005.94919|Cluster-60005.42…
KEGG	ko05143	African trypanosomiasis	24|13055	85|37029	0.834112	0.966248	24	Cluster-60005.58073|Cluster-60005.102295|Cluster-60005.93805|Cluster-60005.94823|Cluster-60005.68876|Cluster-60005.99365|Cluster-60005.34089|Cluster-60005.8104|Cluster-60005.79390|Cluster-60005.105905|Cluster-60005.25568|Cluster-60005.55835|Cluster-61096.0|Cluster-60005.24290|Cluster-60005.78003|Cluster-60005.21454|Cluster-60005.21453|Cluster-8105.0|Cluster-4757.0|Cluster-60005.109501|Cluster-695…
KEGG	ko00750	Vitamin B6 metabolism	27|13055	95|37029	0.838071	0.967641	27	Cluster-60005.45776|Cluster-60005.124968|Cluster-60005.79192|Cluster-55302.0|Cluster-60005.84066|Cluster-60005.81848|Cluster-5809.0|Cluster-60005.44769|Cluster-60005.60724|Cluster-60005.60072|Cluster-60005.97092|Cluster-60005.97093|Cluster-60005.72181|Cluster-60005.17635|Cluster-60005.58851|Cluster-40550.0|Cluster-81247.0|Cluster-60005.81181|Cluster-69590.0|Cluster-60005.44585|Cluster-60005.56458…
KEGG	ko04550	Signaling pathways regulating pluripotency of stem cells	17|13055	63|37029	0.847366	0.97047	17	Cluster-60005.84100|Cluster-67839.0|Cluster-60005.34188|Cluster-60005.124981|Cluster-60005.124982|Cluster-60005.70177|Cluster-60005.41969|Cluster-60005.40546|Cluster-60005.42525|Cluster-60005.42031|Cluster-60005.47197|Cluster-60005.30282|Cluster-60005.31381|Cluster-60005.91235|Cluster-28842.0|Cluster-60005.50752|Cluster-60005.22806
KEGG	ko04024	cAMP signaling pathway	192|13055	605|37029	0.849485	0.97047	192	Cluster-60005.60801|Cluster-60005.57550|Cluster-60005.111869|Cluster-60005.28271|Cluster-60005.113324|Cluster-60005.92335|Cluster-60005.42737|Cluster-51829.0|Cluster-60005.49895|Cluster-81346.0|Cluster-60005.34059|Cluster-60005.34188|Cluster-5125.0|Cluster-60005.119855|Cluster-66359.0|Cluster-60005.49636|Cluster-44001.0|Cluster-60005.99666|Cluster-60005.4110|Cluster-60005.32476|Cluster-60005.1012…
KEGG	ko04512	ECM-receptor interaction	19|13055	70|37029	0.852505	0.97047	19	Cluster-60005.82844|Cluster-26533.1|Cluster-79380.0|Cluster-60005.80467|Cluster-58621.0|Cluster-60005.82823|Cluster-60005.74541|Cluster-60005.117370|Cluster-60005.91820|Cluster-60005.75788|Cluster-60005.24492|Cluster-28715.0|Cluster-60005.54604|Cluster-60005.82057|Cluster-60005.58466|Cluster-69388.2|Cluster-60005.33550|Cluster-60005.58420|Cluster-60005.94656
KEGG	ko04918	Thyroid hormone synthesis	82|13055	270|37029	0.856113	0.97047	82	Cluster-60005.98741|Cluster-60005.99679|Cluster-60005.94622|Cluster-60005.27046|Cluster-60005.62467|Cluster-60005.67742|Cluster-60005.67593|Cluster-60005.97153|Cluster-60005.50187|Cluster-60005.66720|Cluster-60005.92216|Cluster-60005.104524|Cluster-60005.82199|Cluster-54442.0|Cluster-60639.0|Cluster-60005.71390|Cluster-60005.54644|Cluster-60005.51531|Cluster-60005.46072|Cluster-8732.0|Cluster-600…
KEGG	ko00450	Selenocompound metabolism	92|13055	301|37029	0.85648	0.97047	92	Cluster-41570.0|Cluster-60005.43499|Cluster-60005.43498|Cluster-60005.102399|Cluster-60005.50440|Cluster-56237.0|Cluster-60005.69416|Cluster-53219.0|Cluster-60005.69418|Cluster-60005.49056|Cluster-60005.48189|Cluster-60005.41816|Cluster-60005.45501|Cluster-60005.111916|Cluster-60005.69780|Cluster-60005.37098|Cluster-60005.37099|Cluster-60005.99275|Cluster-60005.39260|Cluster-60005.81677|Cluster-5…
KEGG	ko00770	Pantothenate and CoA biosynthesis	69|13055	230|37029	0.859193	0.97047	69	Cluster-60005.75160|Cluster-60005.7800|Cluster-60005.72518|Cluster-60005.64078|Cluster-60005.117179|Cluster-60005.48875|Cluster-60005.40434|Cluster-60005.84636|Cluster-60005.124710|Cluster-60005.59461|Cluster-60005.83386|Cluster-60005.114072|Cluster-7766.0|Cluster-60005.102535|Cluster-60005.73098|Cluster-32374.0|Cluster-60005.71858|Cluster-60005.60335|Cluster-60005.36197|Cluster-60005.20706|Clust…
KEGG	ko00400	Phenylalanine, tyrosine and tryptophan biosynthesis	84|13055	277|37029	0.861526	0.97047	84	Cluster-60005.93947|Cluster-60005.85538|Cluster-60005.43053|Cluster-60005.34966|Cluster-60005.108033|Cluster-60005.91767|Cluster-60005.21147|Cluster-42638.0|Cluster-60005.117881|Cluster-60005.55387|Cluster-60005.40782|Cluster-60005.45274|Cluster-60005.115728|Cluster-60005.39546|Cluster-60005.43929|Cluster-60005.82714|Cluster-60005.58954|Cluster-60005.53750|Cluster-60005.89656|Cluster-60005.34877|…
KEGG	ko03015	mRNA surveillance pathway	264|13055	827|37029	0.868287	0.97047	264	Cluster-60005.95436|Cluster-60005.38823|Cluster-59244.0|Cluster-60005.39820|Cluster-47757.0|Cluster-60005.14552|Cluster-60005.49895|Cluster-69760.0|Cluster-60005.79548|Cluster-60005.47636|Cluster-60005.35290|Cluster-60005.67208|Cluster-60005.36917|Cluster-60005.35468|Cluster-60005.61840|Cluster-60005.47121|Cluster-60005.88712|Cluster-60005.69985|Cluster-64379.0|Cluster-60005.54676|Cluster-60005.8…
KEGG	ko03060	Protein export	116|13055	377|37029	0.868563	0.97047	116	Cluster-60005.36030|Cluster-60005.62467|Cluster-60005.96561|Cluster-60005.57711|Cluster-60005.43761|Cluster-54442.0|Cluster-32511.0|Cluster-60005.55040|Cluster-7779.0|Cluster-60005.7889|Cluster-60005.92639|Cluster-32471.0|Cluster-60005.53874|Cluster-39841.0|Cluster-60005.69261|Cluster-60005.63251|Cluster-60005.62361|Cluster-60005.53235|Cluster-60005.74554|Cluster-60005.29735|Cluster-60005.20178|C…
KEGG	ko00760	Nicotinate and nicotinamide metabolism	66|13055	222|37029	0.869234	0.97047	66	Cluster-11976.0|Cluster-60005.110476|Cluster-60005.100001|Cluster-60005.42392|Cluster-35280.0|Cluster-60005.44483|Cluster-60005.66989|Cluster-60005.75120|Cluster-73461.0|Cluster-60005.47957|Cluster-60005.66233|Cluster-60005.46870|Cluster-60005.104658|Cluster-45013.0|Cluster-60005.52602|Cluster-73619.0|Cluster-64038.0|Cluster-60005.83451|Cluster-60005.37731|Cluster-60005.41534|Cluster-73461.1|Clus…
KEGG	ko04070	Phosphatidylinositol signaling system	155|13055	497|37029	0.870934	0.97047	155	Cluster-60005.2705|Cluster-60005.79883|Cluster-60005.47854|Cluster-60005.57493|Cluster-60005.35199|Cluster-60005.74706|Cluster-68747.0|Cluster-81346.0|Cluster-66359.0|Cluster-60005.37981|Cluster-60005.99666|Cluster-60005.4110|Cluster-60005.32476|Cluster-30527.0|Cluster-60005.55680|Cluster-60005.100538|Cluster-60005.84532|Cluster-60005.45821|Cluster-60005.68178|Cluster-78564.0|Cluster-60005.43774|…
KEGG	ko00040	Pentose and glucuronate interconversions	59|13055	202|37029	0.88357	0.981433	59	Cluster-60005.85528|Cluster-60005.46294|Cluster-60005.76366|Cluster-60005.88885|Cluster-60005.51723|Cluster-60005.70967|Cluster-60005.5314|Cluster-4397.0|Cluster-60005.72277|Cluster-60005.52061|Cluster-8182.0|Cluster-60005.96343|Cluster-60005.110691|Cluster-60005.109841|Cluster-60005.116063|Cluster-71305.0|Cluster-60005.101717|Cluster-59757.0|Cluster-60005.50846|Cluster-65413.0|Cluster-60005.2949…
KEGG	ko00310	Lysine degradation	98|13055	325|37029	0.888368	0.98365	98	Cluster-60005.49898|Cluster-39745.0|Cluster-60005.69346|Cluster-60005.75651|Cluster-60005.60318|Cluster-60005.26590|Cluster-8830.0|Cluster-60005.98364|Cluster-60541.1|Cluster-60005.108403|Cluster-60005.35840|Cluster-60005.70728|Cluster-60005.90645|Cluster-60005.93114|Cluster-76022.0|Cluster-60005.76829|Cluster-60005.52245|Cluster-60005.74485|Cluster-60005.46495|Cluster-60005.58850|Cluster-60005.6…
KEGG	ko00380	Tryptophan metabolism	84|13055	282|37029	0.891966	0.984528	84	Cluster-60005.72468|Cluster-60005.96737|Cluster-60005.15326|Cluster-60005.70810|Cluster-60005.102295|Cluster-60005.5942|Cluster-60005.54591|Cluster-60005.76366|Cluster-28211.0|Cluster-60005.58701|Cluster-60005.68876|Cluster-60005.38313|Cluster-60005.87697|Cluster-60005.98364|Cluster-60005.75651|Cluster-8182.0|Cluster-60005.115892|Cluster-60005.26590|Cluster-60005.80031|Cluster-60005.1662|Cluster-…
KEGG	ko00670	One carbon pool by folate	73|13055	248|37029	0.894962	0.984739	73	Cluster-42905.1|Cluster-60005.101250|Cluster-60005.76631|Cluster-60005.32890|Cluster-60005.17876|Cluster-60005.37670|Cluster-60005.22359|Cluster-60005.22358|Cluster-60005.65428|Cluster-60005.61295|Cluster-60005.41533|Cluster-4907.1|Cluster-4907.0|Cluster-60005.34323|Cluster-60005.85582|Cluster-60005.56545|Cluster-60005.47308|Cluster-60005.68043|Cluster-60005.20346|Cluster-60005.47307|Cluster-7131…
KEGG	ko00592	alpha-Linolenic acid metabolism	63|13055	219|37029	0.91001	0.986523	63	Cluster-60005.57550|Cluster-60005.42342|Cluster-62544.0|Cluster-60005.92335|Cluster-76534.0|Cluster-60005.8857|Cluster-60005.50514|Cluster-60005.60062|Cluster-60005.20625|Cluster-60005.42022|Cluster-60005.64314|Cluster-60005.30353|Cluster-47953.0|Cluster-60005.54829|Cluster-60005.26094|Cluster-36255.0|Cluster-51371.0|Cluster-60005.34137|Cluster-60005.78336|Cluster-60005.104726|Cluster-60005.11169…
KEGG	ko04514	Cell adhesion molecules (CAMs)	9|13055	40|37029	0.911894	0.986523	9	Cluster-60005.34761|Cluster-65515.0|Cluster-60005.32529|Cluster-60005.40441|Cluster-60005.51760|Cluster-60005.41080|Cluster-60005.48238|Cluster-60005.35410|Cluster-60005.57691
KEGG	ko00908	Zeatin biosynthesis	5|13055	25|37029	0.914431	0.986523	5	Cluster-60005.61818|Cluster-34813.0|Cluster-60005.28966|Cluster-60005.71840|Cluster-60005.15389
KEGG	ko04113	Meiosis - yeast	116|13055	387|37029	0.915673	0.986523	116	Cluster-60005.95436|Cluster-59244.0|Cluster-60005.49895|Cluster-60005.45236|Cluster-60005.54065|Cluster-60005.34059|Cluster-60005.61655|Cluster-64379.0|Cluster-60005.70509|Cluster-60005.3003|Cluster-60005.91776|Cluster-60005.28569|Cluster-60005.60952|Cluster-60005.209|Cluster-60005.55969|Cluster-71330.0|Cluster-60005.27427|Cluster-60005.26874|Cluster-60005.43362|Cluster-60005.74794|Cluster-60005.…
KEGG	ko03460	Fanconi anemia pathway	106|13055	356|37029	0.916562	0.986523	106	Cluster-60005.39829|Cluster-60005.52845|Cluster-38282.1|Cluster-60005.53436|Cluster-60005.59813|Cluster-60005.72320|Cluster-60005.27113|Cluster-60005.61654|Cluster-71287.0|Cluster-60005.28836|Cluster-61802.0|Cluster-60005.76292|Cluster-60005.52557|Cluster-31864.0|Cluster-60005.11802|Cluster-60005.32664|Cluster-60005.90854|Cluster-60005.6007|Cluster-60005.90851|Cluster-60005.90852|Cluster-60005.53…
KEGG	ko00780	Biotin metabolism	35|13055	131|37029	0.925855	0.986523	35	Cluster-60005.93960|Cluster-60005.80014|Cluster-60005.112265|Cluster-60005.51333|Cluster-60005.76718|Cluster-60005.107588|Cluster-60005.75022|Cluster-60005.56897|Cluster-60005.63025|Cluster-60005.1707|Cluster-60005.47817|Cluster-60005.82441|Cluster-60005.34504|Cluster-60005.48671|Cluster-60005.99894|Cluster-60005.77328|Cluster-60005.42813|Cluster-60005.61368|Cluster-60005.41661|Cluster-60005.1203…
KEGG	ko01524	Platinum drug resistance	117|13055	393|37029	0.926418	0.986523	117	Cluster-60005.39829|Cluster-60005.52845|Cluster-60005.14258|Cluster-60005.14257|Cluster-64040.0|Cluster-60005.3344|Cluster-60005.66360|Cluster-60005.34188|Cluster-60005.61654|Cluster-60005.7006|Cluster-60005.60098|Cluster-60005.33302|Cluster-60005.39217|Cluster-60005.52557|Cluster-60005.11802|Cluster-60005.5597|Cluster-60005.49057|Cluster-60005.67818|Cluster-60005.12181|Cluster-60005.33304|Cluste…
KEGG	ko00510	N-Glycan biosynthesis	102|13055	346|37029	0.92651	0.986523	102	Cluster-40855.0|Cluster-60005.64491|Cluster-60005.83105|Cluster-61899.0|Cluster-60005.57015|Cluster-60005.83660|Cluster-60005.104514|Cluster-8308.0|Cluster-60005.40210|Cluster-60005.61537|Cluster-63145.0|Cluster-60005.80308|Cluster-60005.98237|Cluster-60005.34420|Cluster-52258.0|Cluster-7060.0|Cluster-60005.90798|Cluster-60005.39503|Cluster-60005.99041|Cluster-60005.75033|Cluster-60005.49177|Clus…
KEGG	ko04976	Bile secretion	66|13055	232|37029	0.927048	0.986523	66	Cluster-60005.49909|Cluster-60005.17180|Cluster-60005.79196|Cluster-60005.113324|Cluster-60005.42523|Cluster-60005.38623|Cluster-60005.54961|Cluster-51829.0|Cluster-60005.102259|Cluster-60005.66749|Cluster-60005.98741|Cluster-60005.12217|Cluster-69258.1|Cluster-60005.58818|Cluster-60005.57139|Cluster-38567.0|Cluster-60005.111452|Cluster-47945.0|Cluster-60005.55037|Cluster-7107.0|Cluster-60005.916…
KEGG	ko00290	Valine, leucine and isoleucine biosynthesis	55|13055	197|37029	0.928962	0.986523	55	Cluster-60005.75160|Cluster-60005.4763|Cluster-60005.93747|Cluster-60005.33456|Cluster-60005.117179|Cluster-60005.48875|Cluster-60005.104179|Cluster-60005.79279|Cluster-60005.59461|Cluster-60005.95597|Cluster-70233.0|Cluster-55991.0|Cluster-60005.60335|Cluster-60005.54699|Cluster-60005.53952|Cluster-60005.59372|Cluster-60005.46368|Cluster-60005.40963|Cluster-60005.64975|Cluster-60005.117741|Clust…
KEGG	ko00311	Penicillin and cephalosporin biosynthesis	1|13055	8|37029	0.930311	0.986523	1	Cluster-60005.11612
KEGG	ko00472	D-Arginine and D-ornithine metabolism	1|13055	8|37029	0.930311	0.986523	1	Cluster-60005.11612
KEGG	ko00790	Folate biosynthesis	45|13055	166|37029	0.936628	0.99023	45	Cluster-60005.119627|Cluster-60005.55913|Cluster-60005.45351|Cluster-60005.12454|Cluster-60005.43437|Cluster-60005.48132|Cluster-60005.91373|Cluster-60005.74051|Cluster-37035.0|Cluster-60005.16668|Cluster-60005.55051|Cluster-60005.53766|Cluster-60005.114784|Cluster-60005.37744|Cluster-60005.95930|Cluster-60005.98978|Cluster-60005.41188|Cluster-9303.0|Cluster-60005.54378|Cluster-60005.46822|Cluste…
KEGG	ko00625	Chloroalkane and chloroalkene degradation	20|13055	83|37029	0.943683	0.994693	20	Cluster-60005.38313|Cluster-60005.101717|Cluster-34514.1|Cluster-60005.61722|Cluster-60005.67939|Cluster-9291.0|Cluster-60005.76366|Cluster-10454.0|Cluster-81624.0|Cluster-60005.70967|Cluster-60005.72494|Cluster-60005.76829|Cluster-10328.1|Cluster-60005.66008|Cluster-47141.0|Cluster-65413.0|Cluster-8182.0|Cluster-60005.102590|Cluster-60005.85923|Cluster-60005.46495
KEGG	ko00903	Limonene and pinene degradation	14|13055	63|37029	0.952467	0.999995	14	Cluster-60005.101717|Cluster-34514.1|Cluster-60005.76366|Cluster-10454.0|Cluster-81624.0|Cluster-60005.70967|Cluster-10328.1|Cluster-60005.102590|Cluster-60005.76829|Cluster-65413.0|Cluster-8182.0|Cluster-60005.38313|Cluster-60005.85923|Cluster-60005.46495
KEGG	ko04630	Jak-STAT signaling pathway	24|13055	100|37029	0.959018	0.999995	24	Cluster-60005.63798|Cluster-60005.66303|Cluster-60005.10098|Cluster-60005.31567|Cluster-60005.58310|Cluster-60005.43742|Cluster-60005.21893|Cluster-60005.9468|Cluster-60005.37171|Cluster-60005.119476|Cluster-60005.16020|Cluster-60005.16021|Cluster-60005.65223|Cluster-60005.39443|Cluster-60005.56892|Cluster-60005.113750|Cluster-57813.0|Cluster-60005.26952|Cluster-60005.53846|Cluster-60005.50879|Cl…
KEGG	ko03420	Nucleotide excision repair	147|13055	504|37029	0.967554	0.999995	147	Cluster-60005.39829|Cluster-60005.14559|Cluster-58093.0|Cluster-60005.116709|Cluster-60005.35342|Cluster-60005.106009|Cluster-60005.54673|Cluster-60005.49446|Cluster-60005.50842|Cluster-60005.47687|Cluster-60005.34939|Cluster-60005.93607|Cluster-60005.85267|Cluster-35686.0|Cluster-60005.89012|Cluster-60005.13687|Cluster-58751.0|Cluster-60005.63367|Cluster-60005.82213|Cluster-60005.52321|Cluster-6…
KEGG	ko03430	Mismatch repair	82|13055	298|37029	0.970823	0.999995	82	Cluster-60005.52845|Cluster-60005.62603|Cluster-60005.11802|Cluster-60005.31373|Cluster-60005.108424|Cluster-60005.2350|Cluster-60005.70737|Cluster-31468.0|Cluster-60005.38371|Cluster-60005.106669|Cluster-60005.53041|Cluster-60005.64122|Cluster-60005.73805|Cluster-60005.20842|Cluster-60005.116709|Cluster-60005.15094|Cluster-60005.72320|Cluster-60005.8837|Cluster-60005.49515|Cluster-60005.47767|Cl…
KEGG	ko03030	DNA replication	97|13055	348|37029	0.973268	0.999995	97	Cluster-60005.58356|Cluster-60005.14559|Cluster-60005.48444|Cluster-60005.49446|Cluster-60005.68574|Cluster-60005.50842|Cluster-60005.47687|Cluster-35686.0|Cluster-60005.39175|Cluster-58751.0|Cluster-60005.63367|Cluster-60005.67064|Cluster-60005.59737|Cluster-60005.41118|Cluster-60005.60066|Cluster-80691.0|Cluster-60005.58373|Cluster-60005.47130|Cluster-60005.91789|Cluster-60005.106009|Cluster-52…
KEGG	ko00340	Histidine metabolism	57|13055	218|37029	0.975282	0.999995	57	Cluster-60005.34599|Cluster-60005.96737|Cluster-60005.98364|Cluster-60005.83161|Cluster-60005.108301|Cluster-60005.76366|Cluster-28211.0|Cluster-60005.70967|Cluster-53420.0|Cluster-60005.38313|Cluster-60005.52656|Cluster-8182.0|Cluster-60005.68386|Cluster-60005.107247|Cluster-60005.102590|Cluster-60005.54366|Cluster-72463.0|Cluster-81877.0|Cluster-60005.31078|Cluster-75397.0|Cluster-60005.26869|C…
KEGG	ko04111	Cell cycle - yeast	175|13055	600|37029	0.977732	0.999995	175	Cluster-60005.95436|Cluster-60005.68709|Cluster-59244.0|Cluster-60005.29112|Cluster-31418.0|Cluster-60005.52644|Cluster-60005.45236|Cluster-60005.49208|Cluster-60005.47771|Cluster-60005.61655|Cluster-60005.35342|Cluster-64379.0|Cluster-60005.38909|Cluster-25038.0|Cluster-60005.31387|Cluster-57794.0|Cluster-60005.59333|Cluster-60005.45308|Cluster-60005.59218|Cluster-60005.31439|Cluster-60005.3003|…
KEGG	ko05340	Primary immunodeficiency	3|13055	23|37029	0.977936	0.999995	3	Cluster-60005.22593|Cluster-60005.124780|Cluster-60005.72238
KEGG	ko00511	Other glycan degradation	40|13055	162|37029	0.978347	0.999995	40	Cluster-60005.114960|Cluster-60005.106763|Cluster-70478.0|Cluster-60005.54379|Cluster-60005.34097|Cluster-60005.1870|Cluster-60005.94061|Cluster-60005.53045|Cluster-13183.0|Cluster-60005.20273|Cluster-63614.0|Cluster-55342.0|Cluster-60005.78378|Cluster-50817.0|Cluster-56419.0|Cluster-60005.20672|Cluster-60005.35439|Cluster-60005.20107|Cluster-60005.19306|Cluster-60005.62448|Cluster-56403.0|Cluste…
KEGG	ko00910	Nitrogen metabolism	57|13055	224|37029	0.984777	0.999995	57	Cluster-60005.14518|Cluster-60005.68890|Cluster-62169.0|Cluster-60005.91604|Cluster-60005.112250|Cluster-60005.51426|Cluster-60005.91037|Cluster-60005.39209|Cluster-60005.66962|Cluster-59060.0|Cluster-60005.52114|Cluster-60005.66368|Cluster-60005.17956|Cluster-60005.45849|Cluster-60005.37577|Cluster-60005.103168|Cluster-60005.99474|Cluster-60005.49401|Cluster-39403.0|Cluster-69214.0|Cluster-60005…
KEGG	ko03410	Base excision repair	68|13055	263|37029	0.986983	0.999995	68	Cluster-60005.80850|Cluster-60005.77658|Cluster-60005.62603|Cluster-51922.0|Cluster-60005.41118|Cluster-60005.74432|Cluster-60005.70737|Cluster-60871.0|Cluster-60005.72023|Cluster-60005.106669|Cluster-60005.13827|Cluster-60005.98330|Cluster-60005.68910|Cluster-60005.7144|Cluster-60005.13224|Cluster-60005.7723|Cluster-34140.0|Cluster-50947.0|Cluster-60005.44552|Cluster-38404.0|Cluster-60005.50842|…
KEGG	ko03020	RNA polymerase	131|13055	473|37029	0.989322	0.999995	131	Cluster-60005.51511|Cluster-60005.69342|Cluster-32580.0|Cluster-60005.58051|Cluster-60005.63293|Cluster-60005.57152|Cluster-60005.118287|Cluster-50145.0|Cluster-60005.22791|Cluster-60005.81563|Cluster-60005.41953|Cluster-60005.41954|Cluster-54280.0|Cluster-79732.0|Cluster-60005.55876|Cluster-60005.53871|Cluster-60005.24038|Cluster-60005.119473|Cluster-60005.31533|Cluster-60005.62474|Cluster-60005…
KEGG	ko05206	MicroRNAs in cancer	102|13055	384|37029	0.992702	0.999995	102	Cluster-60005.63691|Cluster-7994.0|Cluster-60005.91545|Cluster-47945.0|Cluster-60005.102259|Cluster-39972.0|Cluster-60005.46639|Cluster-60005.32471|Cluster-4831.0|Cluster-60005.119476|Cluster-60005.31388|Cluster-60005.19264|Cluster-60005.94919|Cluster-60005.16020|Cluster-60005.16021|Cluster-60005.54961|Cluster-60005.93816|Cluster-60005.70725|Cluster-71051.0|Cluster-60005.47439|Cluster-60005.23714…
KEGG	ko00240	Pyrimidine metabolism	338|13055	1137|37029	0.992968	0.999995	338	Cluster-60005.77344|Cluster-60005.69342|Cluster-60005.58356|Cluster-41570.0|Cluster-60005.43499|Cluster-60005.43498|Cluster-60005.57967|Cluster-60005.51511|Cluster-60005.57152|Cluster-60005.40799|Cluster-60005.118456|Cluster-60005.6594|Cluster-60005.91537|Cluster-60005.118287|Cluster-32580.0|Cluster-60005.102551|Cluster-77571.0|Cluster-50145.0|Cluster-60005.22791|Cluster-67394.0|Cluster-60005.815…
KEGG	ko00230	Purine metabolism	473|13055	1579|37029	0.997047	0.999995	473	Cluster-60005.62185|Cluster-60005.72439|Cluster-60005.17325|Cluster-60005.97210|Cluster-60005.69342|Cluster-32580.0|Cluster-50145.0|Cluster-60005.22791|Cluster-60005.33614|Cluster-60005.89305|Cluster-60005.50842|Cluster-60005.51047|Cluster-60005.98856|Cluster-60005.86219|Cluster-60005.18718|Cluster-60005.95936|Cluster-60005.119473|Cluster-60005.82100|Cluster-60005.54580|Cluster-60005.80000|Cluste…
KEGG	ko03440	Homologous recombination	68|13055	285|37029	0.998017	0.999995	68	Cluster-79315.0|Cluster-60005.50842|Cluster-60005.106669|Cluster-60005.53436|Cluster-60005.59813|Cluster-60005.104299|Cluster-60005.31373|Cluster-60005.47767|Cluster-60005.9442|Cluster-60005.7723|Cluster-60005.46199|Cluster-60005.106775|Cluster-50947.0|Cluster-7514.0|Cluster-60005.40929|Cluster-37092.0|Cluster-60005.24603|Cluster-27479.0|Cluster-60005.47669|Cluster-60005.32664|Cluster-60005.57259…
KEGG	ko00970	Aminoacyl-tRNA biosynthesis	266|13055	961|37029	0.999467	0.999995	266	Cluster-23963.0|Cluster-60005.56019|Cluster-60005.30717|Cluster-60005.30719|Cluster-60005.57808|Cluster-60005.81880|Cluster-60005.58054|Cluster-60005.86594|Cluster-50198.1|Cluster-47199.1|Cluster-60005.12020|Cluster-60005.83577|Cluster-60005.57934|Cluster-9673.0|Cluster-9673.1|Cluster-60005.41650|Cluster-52124.0|Cluster-34946.0|Cluster-60005.73883|Cluster-60005.80499|Cluster-60005.67935|Cluster-6…
KEGG	ko03040	Spliceosome	523|13055	1872|37029	0.999995	0.999995	523	Cluster-60005.51193|Cluster-60005.46338|Cluster-60005.43398|Cluster-60005.47122|Cluster-60005.51040|Cluster-60005.78768|Cluster-60005.18248|Cluster-60005.55567|Cluster-60005.47990|Cluster-71245.0|Cluster-60005.36147|Cluster-60005.92429|Cluster-60005.42551|Cluster-60005.54613|Cluster-60005.64707|Cluster-55561.0|Cluster-60005.55744|Cluster-60005.55367|Cluster-60005.64063|Cluster-60005.66859|Cluster…
